# Supplementary material for: p-TsOH promoted synthesis of benzo-fused O-heterocycles from alkynolsviaring contraction and C–O scission strategy
Source: Royal Society of Chemistry journal article supplement (doi:10.1039/c8gc00749g), 2018-01-01

## Supporting Information

For

### ***p*-TsOH Promoted Synthesis of Benzo-Fused O-Heterocycles from Alkynols via Ring Contraction and C-O Scission Strategy**

Gopal Chandru Senadi,<sup>a</sup> and Jeh-Jeng Wang<sup>\*,a,b</sup>

<sup>a</sup>Department of Medicinal and Applied Chemistry, Kaohsiung Medical University, No. 100, Shih-Chuan 1<sup>st</sup> Rd, Sanmin district, Kaohsiung City, 807 (Taiwan).

<sup>b</sup>Department of Medical Research, Kaohsiung Medical University Hospital, No. 100, Tzyou 1<sup>st</sup> Rd, Sanmin District, Kaohsiung City, 807 (Taiwan).

*E-mail: jjwang@kmu.edu.tw*



## **Table of Contents**

|                                                      |          |
|------------------------------------------------------|----------|
| 1. General information                               | S3       |
| 2. Studies on parameters                             | S3-S5    |
| 3. Experimental procedures                           | S6-S9    |
| 4. References                                        | S9       |
| 5. Reaction Mechanisms                               | S9-S10   |
| 6. Spectral Characterization                         | S11-S34  |
| 7. Copies of $^1\text{H}$ , $^{13}\text{C}$ and DEPT | S35-S94  |
| 8. Check CIF File                                    | S95-S110 |



## (1) General Information

$^1\text{H}$ ,  $^{13}\text{C}$  and DEPT NMR spectra were recorded on a 400 MHz Varian Unity Plus or Varian Mercury plus spectrometer or JEOL ECS-400. The chemical shift ( $\delta$ ) values are reported in parts per million (ppm), and the coupling constants (J) are given in Hz. The spectra were recorded using  $\text{CDCl}_3$  as a solvent.  $^1\text{H}$  NMR chemical shifts are referenced to tetramethylsilane (TMS) (0 ppm).  $^{13}\text{C}$  NMR was referenced to  $\text{CDCl}_3$  (77.0 ppm) or d-acetone (29.92 ppm). The abbreviations used are as follows: s, singlet; d, doublet; t, triplet; q, quartet; dd, doublet of doublet; ddd, doublet of doublet of doublet; dt, doublet of triplets; td, triplet of doublet; m, multiplet. Mass spectra and high resolution mass spectra (HRMS) were measured using the ESI (FT-MS solariX) at National Sun Yat-Sen University, Kaohsiung, Taiwan and LTQ Orbitrap XL (Thermo Fischer Scientific) at National Chung Hsing University. Melting points were determined on an EZ-Melt (Automated melting point apparatus). All products reported showed  $^1\text{H}$  NMR spectra in agreement with the assigned structures. Reaction progress and product mixtures were routinely monitored by TLC using Merck TLC aluminum sheets (silica gel 60 F254). Column chromatography was carried out with 230–400 mesh silica gel 60 (Merck) and a mixture of hexane/ethyl acetate or hexane as an eluent. Preparative TLC was run on a Merck TLC aluminum sheets (silica gel 60 F254).

## (2) Studies on reaction parameters

Initially, the reaction was performed using **1a** as the model substrate to optimize the reaction conditions. Control reactions establish that the desired product **2a** was not formed in the absence of TsOH (Table S1, entry 1). Similarly, the reaction gave <10% of product formation in the presence of Lewis acids such as  $\text{AuCl}(\text{PPh}_3)$ ,  $\text{AgOTf}$ ,  $\text{AgSbF}_6$  and  $\text{FeCl}_3$  (Table S1, entries 2-5). Subsequent investigation of reaction under catalytic “iodo” sources like  $\text{I}_2$ , NIS and TBAI gave trace amount of **2a** (Table S1, entries 6-8). The desired product **2a** was obtained in 60% yield when



the reaction was performed with 20% of TsOH.H<sub>2</sub>O for 16 h (Table S1, entry 9). By increasing the equivalents of TsOH to 0.5 and 1.0 resulted in a higher yields than that of catalytic version (Table 1, entry 10-11). Replacing TsOH with other acids such as BF<sub>3</sub>-Et<sub>2</sub>O, TfOH, TFA and

**Table S1. Studies on reaction parameters<sup>a</sup>**

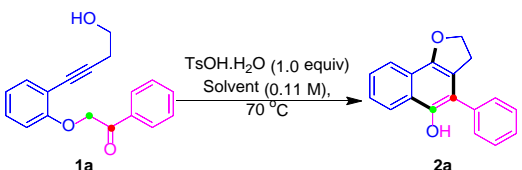

| entry | reagents (equiv)                         | solvent                          | time, h | Yield (%) <sup>b</sup> |
|-------|------------------------------------------|----------------------------------|---------|------------------------|
| 1     | -                                        | 1,2-DCE                          | 16      | 0                      |
| 2     | 5% AuCl(PPh <sub>3</sub> ) (0.05)        | 1,2-DCE                          | 16      | <10                    |
| 3     | 5% AgOTf (0.05)                          | 1,2-DCE                          | 16      | <10                    |
| 4     | 5% AgSbF <sub>6</sub> (0.05)             | 1,2-DCE                          | 16      | <10                    |
| 5     | 5% FeCl <sub>3</sub> (0.05)              | 1,2-DCE                          | 16      | <10                    |
| 6     | I <sub>2</sub> (0.2)                     | 1,2-DCE                          | 16      | <10                    |
| 7     | NIS (0.2)                                | 1,2-DCE                          | 16      | <10                    |
| 8     | TBAI (0.2)                               | 1,2-DCE                          | 16      | 0                      |
| 9     | TsOH (0.2)                               | 1,2-DCE                          | 16      | 60                     |
| 10    | TsOH (0.5)                               | 1,2-DCE                          | 8       | 71                     |
| 11    | TsOH (1.0)                               | 1,2-DCE                          | 6       | 91                     |
| 12    | BF <sub>3</sub> -Et <sub>2</sub> O (1.0) | 1,2-DCE                          | 6       | 40                     |
| 13    | TfOH (1.0)                               | 1,2-DCE                          | 6       | 35                     |
| 14    | TFA (1.0)                                | 1,2-DCE                          | 6       | <10                    |
| 15    | CH <sub>3</sub> COOH (1.0)               | 1,2-DCE                          | 6       | trace                  |
| 16    | TsOH (1.0)                               | H <sub>2</sub> O:1-butanol (9:1) | 6       | 20 <sup>c</sup>        |
| 17    | TsOH (1.0)                               | Acetone                          | 6       | 58 <sup>c</sup>        |
| 18    | TsOH (1.0)                               | Ethanol                          | 6       | 83(88) <sup>c</sup>    |
| 19    | TsOH (1.0)                               | 2-propanol                       | 6       | 75                     |
| 20    | TsOH (1.0)                               | Ethyl acetate                    | 6       | 87(92) <sup>c</sup>    |
| 21    | TsOH (1.0)                               | Methanol                         | 6       | 45 <sup>c</sup>        |
| 22    | TsOH (1.0)                               | Methyl ethyl ketone (MEK)        | 6       | 30 <sup>c</sup>        |
| 23    | TsOH (1.0)                               | 1-butanol                        | 6       | 54 <sup>c</sup>        |
| 25    | TsOH (1.0)                               | Toluene                          | 6       | 90(94) <sup>c</sup>    |
| 25    | TsOH (1.0)                               | Acetonitrile                     | 6       | 82 <sup>c</sup>        |
| 26    | TsOH (1.0)                               | THF                              | 6       | 74 <sup>c</sup>        |
| 27    | TsOH (1.0)                               | DMSO                             | 6       | 60 <sup>c,d</sup>      |
| 28    | TsOH (1.0)                               | Ethylene glycol                  | 6       | 20 <sup>c</sup>        |
| 29    | TsOH (1.0)                               | DMSO                             | 6       | - <sup>e</sup>         |

<sup>a</sup>All reactions were performed with 0.25 mmol of **1a** in 0.11 M of solvent. <sup>b</sup>Isolated yields. <sup>c</sup>Yields were determined by NMR spectra using 1,3,5-trimethoxy benzene as an internal standard. <sup>d</sup>20% of 2-(2-hydroxyethyl)-3-phenylnaphthalene-1,4-dione **12a** was also observed. <sup>e</sup>After 24 h of heating at 100 °C, compound **12a** has been completely converted to **12a** in 80% yields.

CH<sub>3</sub>COOH also failed to improve the yield of **2a** (Table S1, entries 12-15). With the optimized reagent in hand, we next focused on identifying the greener solvent to replace 1,2-dichloroethane.



In this context, preferred and usable green solvents<sup>1</sup> such as water, acetone, ethanol, 2-propanol, ethylacetate, methanol, methyl ethyl ketone, 1-butanol, toluene, acetonitrile, tetrahydrofuran, dimethylsulfoxide and ethylene glycol were tested using 0.25 mmol of **1a** with 1.0 equiv of TsOH.H<sub>2</sub>O at 70 °C for 6 h as shown in Table S1. The reaction proceeded smoothly with ethanol (Table S1, entry 18), ethyl acetate (Table S1, entry 20) and toluene (Table S1, entry 25) in 83-90% yields respectively as compared with other solvents (Table S1, 16-28). While using DMSO as a solvent, 20% of 2-(2-hydroxyethyl)-3-phenylnaphthalene-1,4-dione **12a** was observed as by-product (Table S1, entry 27). When the reaction time and temperature was increased to 100 °C and 24h, the expected **12a** was obtained in 80% yield thus suggesting the role of DMSO also as an oxidant (Table S1, 29).

To finalize the optimum solvent, random reaction was performed with substrate **3o** with ethanol, ethyl acetate and toluene as shown in Table S2. Unfortunately, the reaction gave compound **8b** rather than the desired product **4o** in ethanol and ethylacetate. In case of toluene, the required product in 53% yield. Thus, 1.0 equiv of TsOH.H<sub>2</sub>O in 0.11M of Toluene at 70 °C (Table S2, entry 9) was considered as the optimum reaction conditions.

**Table S2. Solvent finalization study**

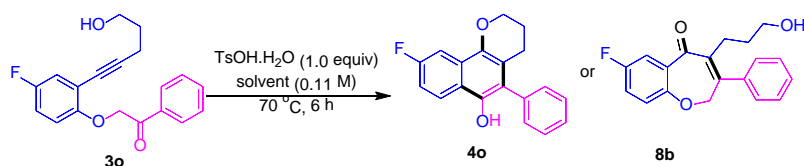

| entry | product   | ethanol | ethylacetate | toluene |
|-------|-----------|---------|--------------|---------|
| 1     | <b>4o</b> | 0%      | 0%           | 51%     |
| 2     | <b>8b</b> | 82%     | 91%          | 0%      |

<sup>a</sup>All reactions were performed with 0.25 mmol of **1a** in 0.11 M of solvents.



### (3) Experimental procedures

#### General procedure A for the synthesis of starting materials 1a-k, 3a-r and 5a-f

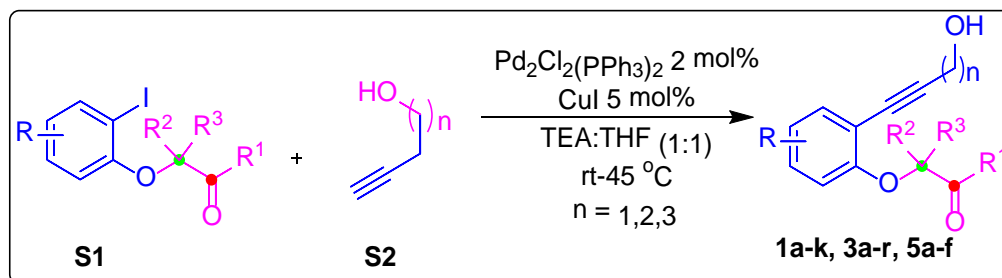

To a stirred solution of **S1** (1.0 equiv) in 1:1 mixture of triethylamine (TEA) and THF were added alkynol (**S2**, 1.5 equiv),  $\text{PdCl}_2(\text{PPh}_3)_2$  catalyst (2.0 mol %) at rt under  $\text{N}_2$  atmosphere. After stirring at room temperature for 5 minutes  $\text{CuI}$  (5.0 mol %) was added and the resultant reaction mixture was allowed to stir at rt-45 °C. The completion of the reaction was monitored with the help of TLC. After completion, the reaction mixture was concentrated under vacuum to remove excess solvent and then diluted using water followed by extraction with ethyl acetate. Combined ethyl acetate layer was washed with water, brine, dried over sodium sulfate and evaporated under reduced pressure. The obtained crude compound was purified by column chromatography (hexane to 25% EA/Hex) to obtain pure starting materials respectively. The structure of compounds **3a**, **3b**, **3c**, **3d**, **3f**, **3g**, **3h**, **3i**, **3l**, **3n**, **3o**, **3p**, **3q**, **5b**, **5c**, **5d** and **5e** were matched with our previous reported literature data.<sup>2</sup>

#### Procedure for the synthesis of starting materials 9a and 9b

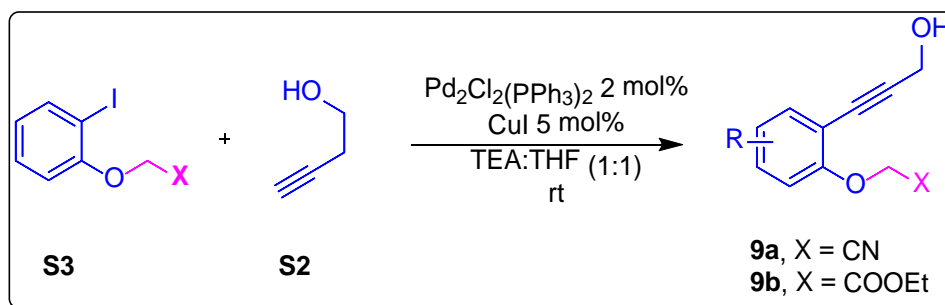



To the stirred solution of **S3** (1.0 equiv) in 1:1 mixture of triethylamine (TEA) and THF were added 3-butyne-1-ol (**S2**, 1.5 equiv),  $\text{PdCl}_2(\text{PPh}_3)_2$  catalyst (2.0 mol %) at rt under  $\text{N}_2$  atmosphere. After stirring at room temperature for 5 minutes CuI (5.0 mol %) was added and the resultant reaction mixture was allowed to stir at rt. The completion of the reaction was monitored with the help of TLC. After completion, the reaction mixture was concentrated under vacuum to remove excess solvent and then diluted using water followed by extraction with ethyl acetate. Combined ethyl acetate layer was washed with water, brine, dried over sodium sulfate and evaporated under reduced pressure. The obtained crude compound was purified by column chromatography (hexane to 25% EA/Hex) to obtain pure starting material **9a** and **9b**.

#### **General procedure B for the TsOH promoted cyclization**

To the stirred solution of **1**, **3**, **5** and **9** (0.25 mmol, 1.0 equiv) in 0.11 M of toluene or 1,2-dichloroethane (1,2-DCE) was added TsOH.  $\text{H}_2\text{O}$  (0.25 mmol, 1.0 equiv) at room temperature and allowed to stir at 70 °C until the completion of reaction was analysed by TLC. After completion, the reaction mixture was diluted using water followed by extraction with dichloromethane or ethylacetate. Combined organic layer was washed with water, brine, dried over sodium sulfate and evaporated under reduced pressure. The obtained crude products were purified by column chromatography (hexane to hexane to 0.25% EA/Hexane) to afford the pure compounds respectively.



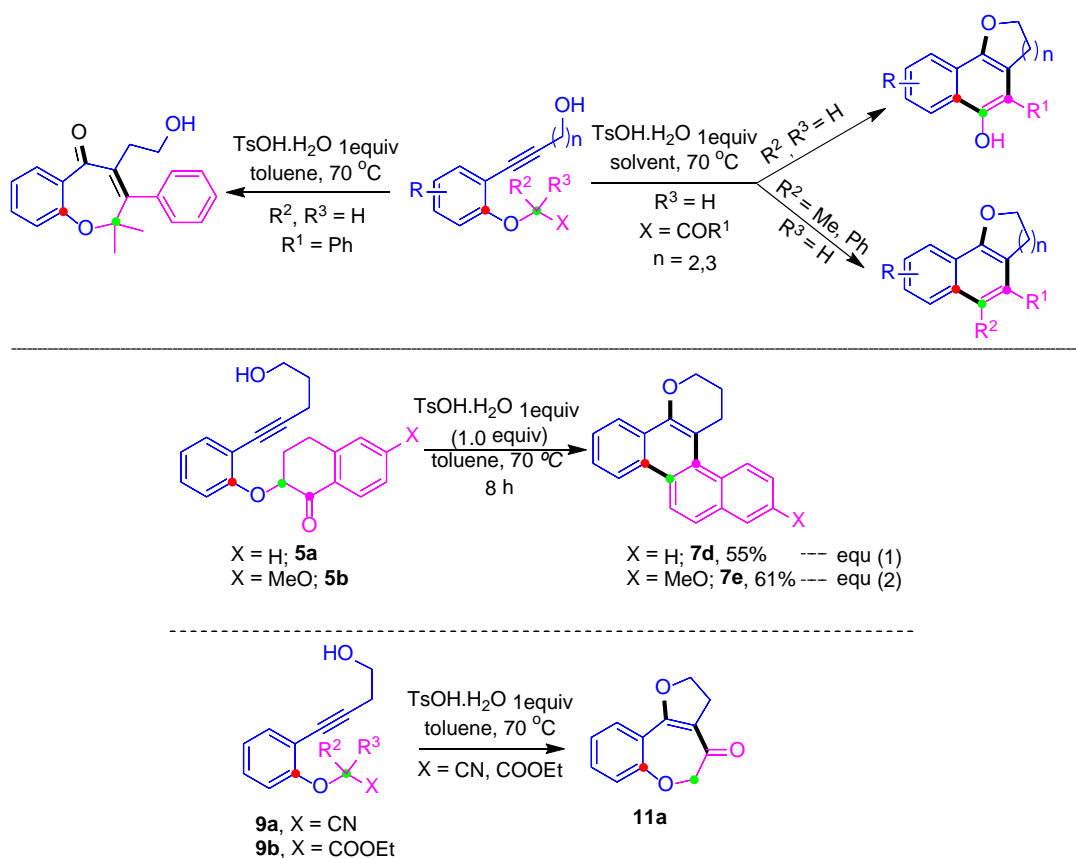

### General procedure C for the synthesis of 1,4-naphthaquinone derivatives

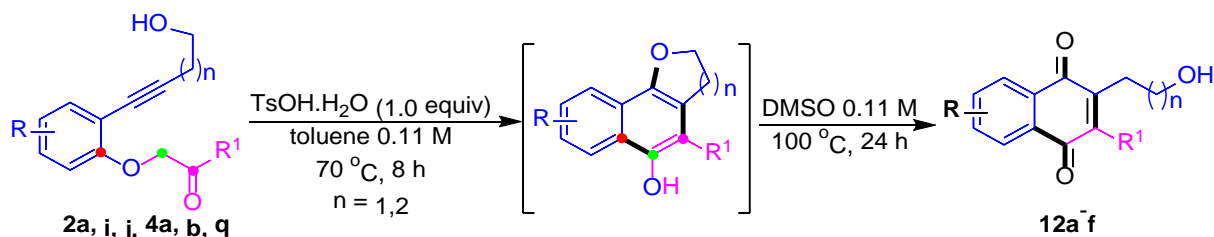

To the stirred solution of **2a, i, j, 4a, b, q** (0.25 mmol, 1.0 equiv) in 0.11M of toluene was added  $\text{TsOH} \cdot \text{H}_2\text{O}$  (0.25 mmol, 1.0 equiv) at room temperature and allowed to stir at  $70^\circ\text{C}$  until the completion of reaction was analysed by TLC. After completion of the reaction, excess toluene was removed under vacuum followed by the addition of DMSO (0.11 M) and continued stirring under air for another 24 h at  $100^\circ\text{C}$ . After completion of the reaction monitored by TLC, the reaction mixture was diluted using water followed by extraction with ethyl acetate. Combined ethyl acetate layer was washed with water followed by brine, dried over sodium sulfate and evaporated under



reduced pressure. The crude products were purified by column chromatography (hexane to 25% EA/Hex) to afford the pure compounds **12a-f**.

#### (4) References

1. K. Alfonsi, J. Colberg, P. J. Dunn, T. Fevig, S. Jennings, T. A. Johnson, H. P. Kleine, C. Knight, M. A. Nagy, D. A. Perry and M. Stefaniak, *Green Chem.* 2008, **10**, 31-36.
2. A. M. Garkhedkar, G. C. Senadi and J. -J. Wang, *Org. Lett.* 2017, **19**, 488-491.

#### (5) Alternative mechanisms from intermediate G

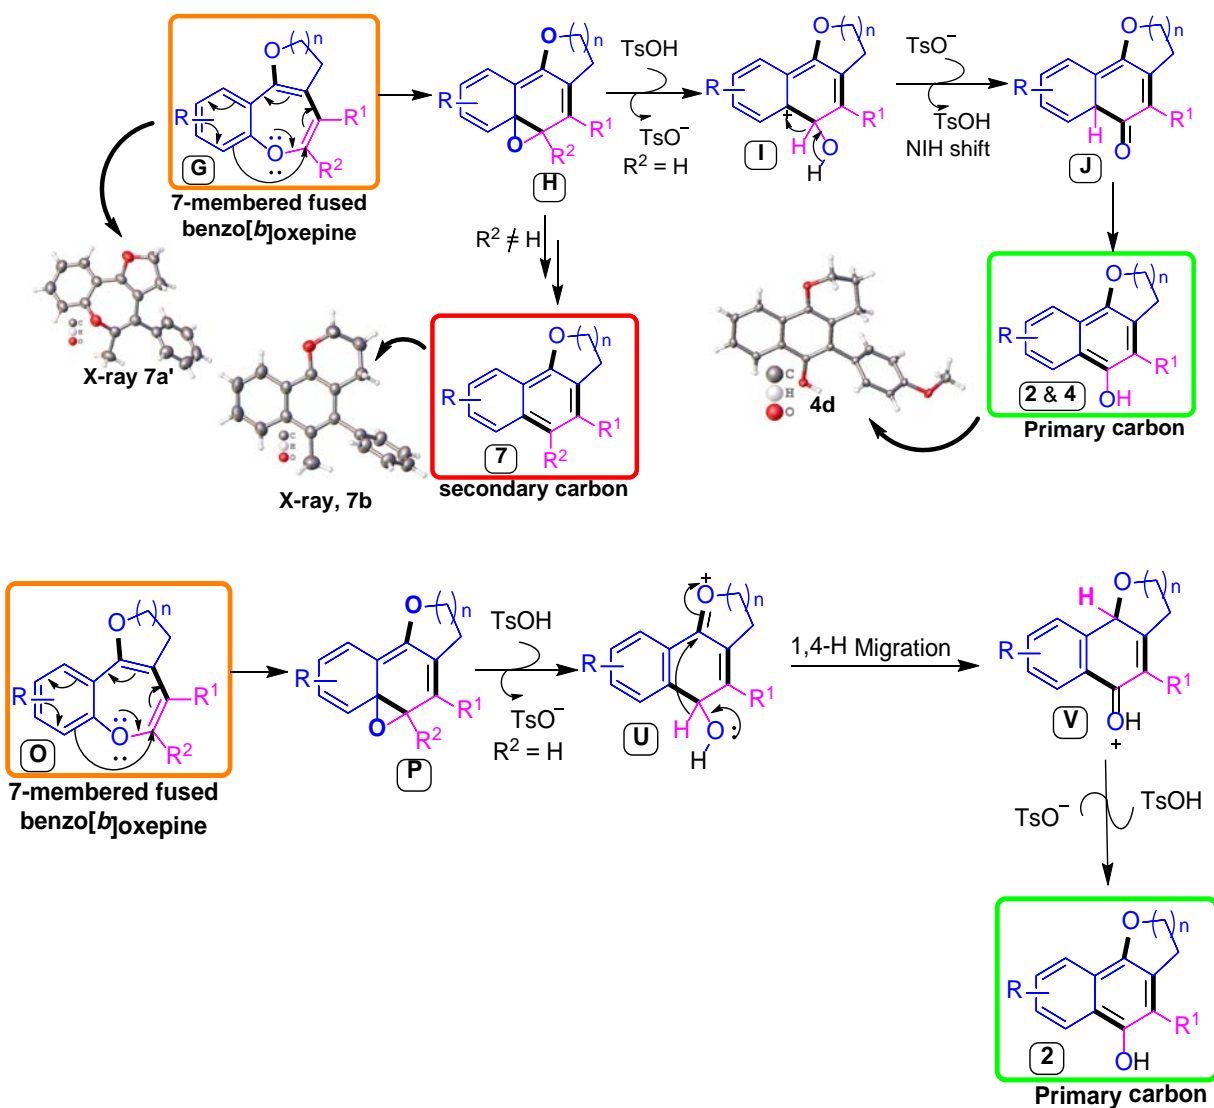



## (6) Mechanism for product 11a and 7d, e

### (i) From nitrile starting material 9a:

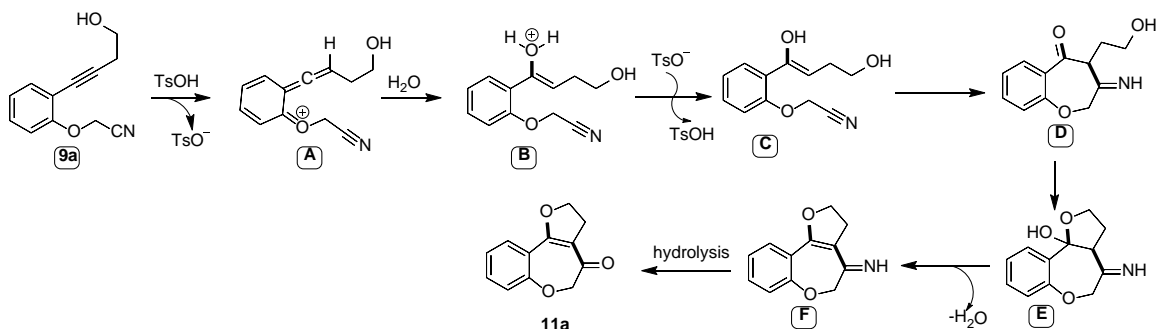

### (ii) From ester starting material 9b:

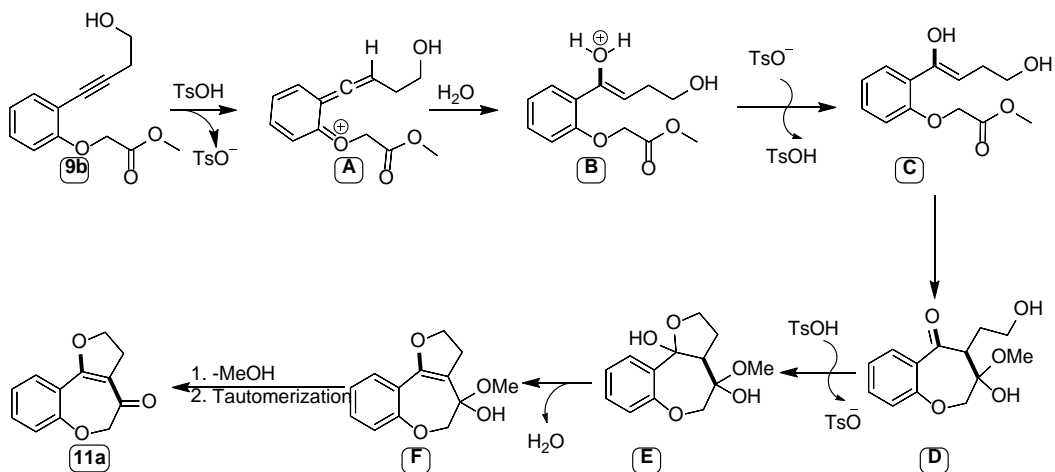

### (iii) From tetralone derivatives 5d and e:

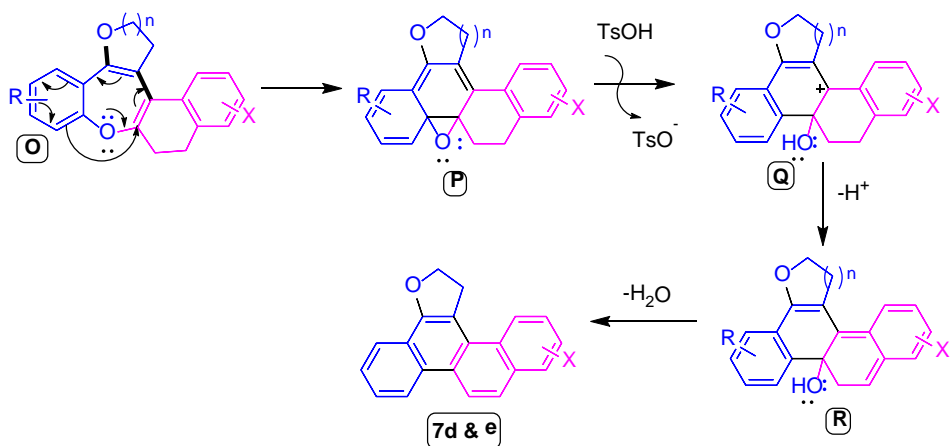



## (7) Spectral Characterization

**2-(2-(4-hydroxybut-1-yn-1-yl)phenoxy)-1-phenylethan-1-one (1a):** The title compound was

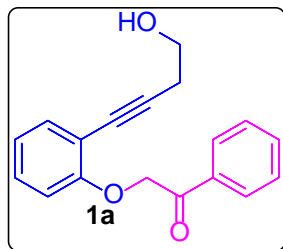

prepared according to the general procedure A as a yellow solid; M.P.

55 °C ~ 57 °C;  $^1\text{H}$  NMR (400 MHz,  $\text{CDCl}_3$ )  $\delta$  8.02 (dt,  $J = 8.5, 1.6$  Hz, 2H), 7.61 (tt,  $J = 7.2, 2.4$  Hz, 1H), 7.53 – 7.47 (m, 2H), 7.39 (dd,  $J = 7.6,$

1.7 Hz, 1H), 7.23 (ddd,  $J = 9.2, 7.7, 3.6$  Hz, 1H), 6.93 (td,  $J = 7.5, 1.0$  Hz, 1H), 6.82 (d,  $J = 8.3$  Hz, 1H), 5.33 (s, 2H), 3.82 (q,  $J = 6.0$  Hz, 2H), 2.84 (t,  $J = 6.4$  Hz, 1H), 2.71 (t,  $J = 5.9$  Hz, 2H);  $^{13}\text{C}$  NMR (101 MHz,  $\text{CDCl}_3$ )  $\delta$  193.81, 158.46, 134.32, 133.91, 133.17, 129.07, 128.77, 128.07, 121.45, 113.40, 112.18, 91.75, 78.37, 71.05, 60.96, 24.23; HR-MS (ESI):  $m/z = 281.1176$ , calcd. for  $\text{C}_{18}\text{H}_{17}\text{O}_3$   $[\text{M}+\text{H}]^+$ : 281.1172.

**2-(2-(4-hydroxybut-1-yn-1-yl)phenoxy)-1-phenylethan-1-one-2,2- $\text{d}_2$  (1a- $\text{D}_2$ ):** The title

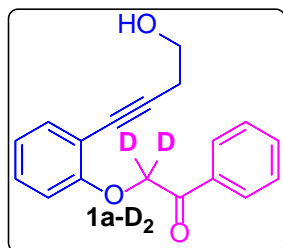

compound was prepared using 1.0 mmol of **1a** and 10 mol% of NaOH in a 1:1 mixture of  $\text{D}_2\text{O}$ /THF (5.6 mL) at room temperature for 16 h. Then the reaction mixture was diluted with ethylacetate and layers were

separated, dried over sodium sulfate. The crude product obtained after evaporation was purified by column chromatography (hexane to 20% EA/Hex) to afford the pure compound as an off-white sticky mass (142 mg, 50% yield).  $^1\text{H}$  NMR (400 MHz,  $\text{CDCl}_3$ )  $\delta$  8.04 – 8.00 (m, 2H), 7.66 – 7.58 (m, 1H), 7.54 – 7.47 (m, 2H), 7.40 (dd,  $J = 7.6, 1.7$  Hz, 1H), 7.26 – 7.19 (m, 2H), 6.94 (td,  $J = 7.5, 1.0$  Hz, 1H), 6.82 (dd,  $J = 8.3, 0.8$  Hz, 1H), 3.82 (d,  $J = 5.3$  Hz, 2H), 2.71 (t,  $J = 5.9$  Hz, 3H);  $^{13}\text{C}$  NMR (101 MHz,  $\text{CDCl}_3$ )  $\delta$  193.96, 158.53, 134.42, 133.95, 133.24, 129.12, 128.81, 128.14, 121.50, 113.45, 112.23, 91.72, 78.47, 61.00, 24.28.; HR-MS (ESI):  $m/z = 305.1117$ , calcd. for  $\text{C}_{18}\text{H}_{14}\text{NaD}_2\text{O}_3$   $[\text{M}+\text{Na}]^+$ : 305.1116.



**2-(2-(4-hydroxybut-1-yn-1-yl)phenoxy)-1-(*p*-tolyl)ethan-1-one (1b):** The title compound was

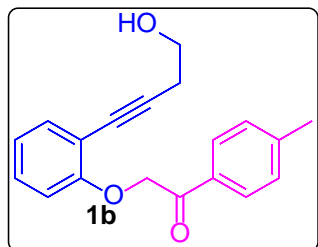

prepared according to the general procedure A as a yellow viscous oil;  $^1\text{H}$  NMR (400 MHz,  $\text{CDCl}_3$ )  $\delta$  7.86 (dt,  $J = 8.4, 1.6$  Hz 2H), 7.34 (dd,  $J = 7.6, 1.7$  Hz, 1H), 7.23 (dd,  $J = 8.5, 0.6$  Hz, 2H), 7.16 (ddd,  $J = 8.3, 7.5, 1.7$  Hz, 1H), 6.87 (td,  $J = 7.5, 1.0$  Hz, 1H), 6.77 (dd,  $J = 8.4, 0.7$  Hz, 1H), 5.24 (s, 2H), 3.80 (t,  $J = 6.1$  Hz, 2H), 3.46 – 3.27 (m, 1H), 2.67 (t,  $J = 6.1$  Hz, 2H), 2.36 (s, 3H);  $^{13}\text{C}$  NMR (101 MHz,  $\text{CDCl}_3$ )  $\delta$  193.37, 158.32, 144.65, 132.97, 131.60, 129.22, 128.80, 127.93, 121.11, 113.23, 112.15, 91.69, 78.05, 70.77, 60.74, 23.98, 21.47; HR-MS (ESI):  $m/z = 317.1148$ , calcd. for  $\text{C}_{19}\text{H}_{18}\text{NaO}_3$   $[\text{M}+\text{Na}]^+$ : 317.1147.

**2-(2-(4-hydroxybut-1-yn-1-yl)phenoxy)-1-(*m*-tolyl)ethan-1-one (1c):** The title compound was

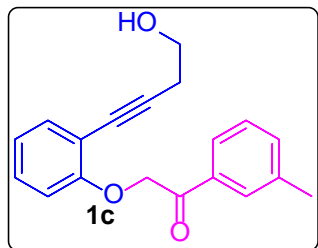

prepared according to the general procedure A as a yellow viscous oil;  $^1\text{H}$  NMR (400 MHz,  $\text{CDCl}_3$ )  $\delta$  7.84 – 7.78 (m, 2H), 7.45 – 7.34 (m, 3H), 7.23 (ddd,  $J = 8.3, 7.6, 1.7$  Hz, 1H), 6.93 (td,  $J = 7.5, 1.0$  Hz, 1H), 6.82 (dd,  $J = 8.3, 0.7$  Hz, 1H), 5.32 (s, 2H), 3.83 (t,  $J = 5.4$  Hz, 2H), 2.88 (s, 1H), 2.71 (t,  $J = 5.9$  Hz, 2H), 2.42 (s, 3H);  $^{13}\text{C}$  NMR (101 MHz,  $\text{CDCl}_3$ )  $\delta$  193.92, 158.53, 138.71, 134.70, 134.36, 133.16, 129.06, 128.64, 128.54, 125.19, 121.42, 113.45, 112.23, 91.77, 78.42, 71.06, 60.97, 24.27, 21.30; HR-MS (ESI):  $m/z = 317.1148$ , calcd. for  $\text{C}_{19}\text{H}_{18}\text{NaO}_3$   $[\text{M}+\text{Na}]^+$ : 317.1146.

**2-(2-(4-hydroxybut-1-yn-1-yl)phenoxy)-1-(4-methoxyphenyl)ethan-1-one (1d):** The title

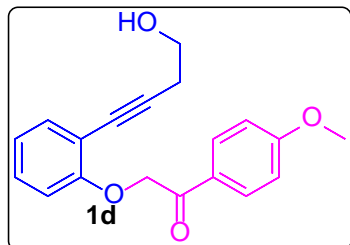

compound was prepared according to the general procedure A as a yellow viscous oil;  $^1\text{H}$  NMR (400 MHz,  $\text{CDCl}_3$ )  $\delta$  8.01 (dt,  $J = 9.2, 2.8$  Hz, 2H), 7.38 (dd,  $J = 7.6, 1.7$  Hz, 1H), 7.21 (ddd,  $J = 8.3, 7.6, 1.7$  Hz, 1H), 6.95 (dt,  $J = 8.0, 2.8$  Hz, 2H), 6.92 (td,  $J = 7.6, 0.8$  Hz, 1H), 6.81 (dd,  $J = 8.3, 0.7$  Hz, 1H), 5.27 (s, 2H), 3.86 (s, 3H), 3.85 – 3.78 (m, 2H), 3.05 (s, 1H), 2.70 (t,  $J = 6.0$  Hz, 2H);  $^{13}\text{C}$



NMR (101 MHz,  $\text{CDCl}_3$ )  $\delta$  192.42, 164.01, 158.52, 133.12, 130.44, 129.02, 127.31, 121.31, 113.91, 113.34, 112.20, 91.73, 78.34, 70.89, 60.92, 55.45, 24.19; HR-MS (ESI):  $m/z$  = 333.1097, calcd. for  $\text{C}_{19}\text{H}_{18}\text{NaO}_4$   $[\text{M}+\text{Na}]^+$ : 333.1094.

**1-(4-fluorophenyl)-2-(2-(4-hydroxybut-1-yn-1-yl)phenoxy)ethan-1-one (1e):** The title

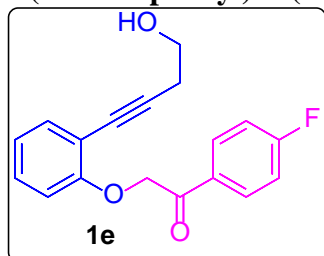

compound was prepared according to the general procedure A as a

yellow viscous oil;  $^1\text{H}$  NMR (400 MHz,  $\text{CDCl}_3$ )  $\delta$  8.08 – 8.01 (m, 2H),

7.36 (dd,  $J$  = 7.6, 1.7 Hz, 1H), 7.23 – 7.09 (m, 3H), 6.90 (td,  $J$  = 7.5,

1.0 Hz, 1H), 6.79 (dd,  $J$  = 8.4, 0.8 Hz, 1H), 5.26 (s, 2H), 3.80 (t,  $J$  = 6.0 Hz, 2H), 3.08 (s, 1H), 2.68

(t,  $J$  = 6.1 Hz, 2H);  $^{13}\text{C}$  NMR (101 MHz,  $\text{CDCl}_3$ )  $\delta$  192.61, 165.95 (d,  $J_F$  = 254.7 Hz) 158.24,

133.20, 130.88 (d,  $J_F$  = 9.2 Hz), 130.69 (d,  $J_F$  = 3.1 Hz), 128.99, 121.46, 115.88 (d,  $J_F$  = 21.8 Hz),

113.32, 112.22, 91.77, 78.14, 71.04, 60.83, 24.05; HR-MS (ESI):  $m/z$  = 321.0897, calcd. for

$\text{C}_{18}\text{H}_{15}\text{FNaO}_3$   $[\text{M}+\text{Na}]^+$ : 321.0894.

**1-(4-chlorophenyl)-2-(2-(4-hydroxybut-1-yn-1-yl)phenoxy)ethan-1-one (1f):** The title

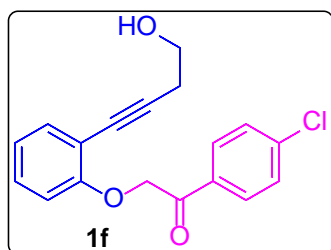

compound was prepared using the general procedure A as a yellow

viscous oil;  $^1\text{H}$  NMR (400 MHz,  $\text{CDCl}_3$ )  $\delta$  7.94 (dt,  $J$  = 8.8, 2.4 Hz,

2H), 7.43 (dt,  $J$  = 6.8, 2.4 Hz, 2H), 7.36 (dd,  $J$  = 7.6, 1.6 Hz, 1H), 7.19

(ddd,  $J$  = 8.4, 7.6, 1.6 Hz, 1H), 6.90 (td,  $J$  = 7.2, 0.8 Hz, 1H), 6.78 (d,  $J$  = 8.4 Hz, 1H), 5.25 (s,

2H), 3.80 (t,  $J$  = 6.0 Hz, 2H), 2.68 (t,  $J$  = 6.0 Hz, 1H);  $^{13}\text{C}$  NMR (101 MHz,  $\text{CDCl}_3$ )  $\delta$  193.14,

158.26, 140.35, 133.30, 132.61, 129.60, 129.06, 121.60, 113.41, 112.28, 91.8, 78.23, 71.15, 60.89,

24.11; HR-MS (ESI):  $m/z$  = 315.0779, calcd. for  $\text{C}_{18}\text{H}_{16}\text{O}_3\text{Cl}$   $[\text{M}+\text{H}]^+$ : 315.0782.



**Methyl 4-(2-(2-(4-hydroxybut-1-yn-1-yl)phenoxy)acetyl)benzoate (1g):** The title compound

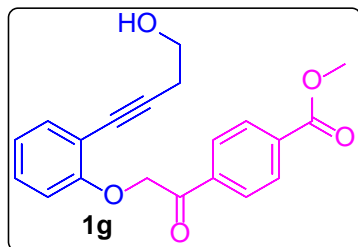

was prepared using the general procedure A as a yellow solid; M.P.

99 °C ~ 101 °C;  $^1\text{H}$  NMR (400 MHz,  $\text{CDCl}_3$ )  $\delta$  8.13-8.04 (m, 4H),

7.37 (dd,  $J = 7.6, 2.0$  Hz, 1H), 7.22 (ddd,  $J = 8.4, 7.6, 1.2$  Hz, 1H),

6.92 (tt,  $J = 7.6, 0.8$  Hz, 1H), 6.81 (d,  $J = 8.4$  Hz, 1H); 5.31 (s, 2H), 3.93 (s, 3H), 3.80 (t,  $J = 6.0$

Hz, 1H), 2.68 (t,  $J = 6.0$  Hz, 2H);  $^{13}\text{C}$  NMR (101 MHz,  $\text{CDCl}_3$ )  $\delta$  193.84, 166.01, 158.29, 137.53,

134.50, 133.31, 129.88, 129.10, 128.15, 121.67, 113.50, 112.34, 91.82, 71.40, 60.94, 52.51, 24.17;

HR-MS (ESI):  $m/z = 339.1226$ , calcd. for  $\text{C}_{20}\text{H}_{19}\text{O}_5$   $[\text{M}+\text{H}]^+$ : 339.1227.

**1-(3,4-dichlorophenyl)-2-(2-(4-hydroxybut-1-yn-1-yl)phenoxy)ethan-1-one (1h):** The title

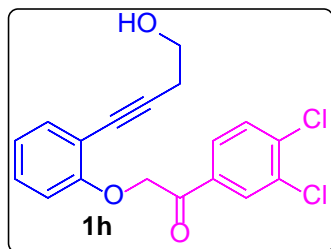

compound was prepared according to the general procedure A as a

yellow viscous oil;  $^1\text{H}$  NMR (400 MHz,  $\text{CDCl}_3$ )  $\delta$  8.15 – 8.11 (m,

1H), 7.86 (dd,  $J = 8.4, 2.0$  Hz, 1H), 7.56 (d,  $J = 8.4$  Hz, 1H), 7.38 (dd,

$J = 7.6, 1.7$  Hz, 1H), 7.23 (ddd,  $J = 8.3, 7.5, 1.7$  Hz, 1H), 6.94 (td,  $J = 7.5, 1.0$  Hz, 1H), 6.81 (dd,

$J = 8.4, 0.8$  Hz, 1H), 5.24 (s, 2H), 3.82 (t,  $J = 6.0$  Hz, 2H), 2.71 (t,  $J = 6.0$  Hz, 2H);  $^{13}\text{C}$  NMR

(101 MHz,  $\text{CDCl}_3$ )  $\delta$  192.44, 158.07, 138.53, 133.81, 133.45, 133.39, 130.88, 130.32, 129.14,

127.32, 121.78, 113.44, 112.24, 91.82, 78.19, 71.29, 60.94, 24.16; HR-MS (ESI):  $m/z = 371.0212$ ,

calcd. for  $\text{C}_{18}\text{H}_{14}\text{Cl}_2\text{NaO}_3$   $[\text{M}+\text{Na}]^+$ : 371.0211.

**2-(2-(4-hydroxybut-1-yn-1-yl)phenoxy)-1-(naphthalen-2-yl)ethan-1-one (1i):** The title

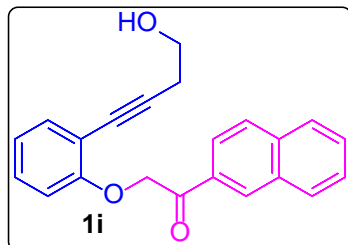

compound was prepared according to the general procedure A as a

yellow viscous oil;  $^1\text{H}$  NMR (400 MHz,  $\text{CDCl}_3$ )  $\delta$  8.56 (d,  $J = 1.1$

Hz, 1H), 8.04 (dd,  $J = 8.6, 1.8$  Hz, 1H), 7.97 (dd,  $J = 8.0, 0.6$  Hz,

1H), 7.93 – 7.85 (m, 2H), 7.59 (dddd,  $J = 22.1, 8.1, 6.9, 1.3$  Hz, 2H), 7.39 (dd,  $J = 7.6, 1.7$  Hz,

1H), 7.27 – 7.19 (m, 1H), 6.93 (td,  $J = 7.5, 1.0$  Hz, 1H), 6.87 (dd,  $J = 8.3, 0.7$  Hz, 1H), 5.43 (s,



2H), 3.79 (t,  $J = 5.9$  Hz, 2H), 2.85 (s, 1H), 2.67 (t,  $J = 5.9$  Hz, 2H);  $^{13}\text{C}$  NMR (101 MHz,  $\text{CDCl}_3$ )  $\delta$  193.90, 158.51, 135.86, 133.21, 132.32, 131.64, 130.06, 129.61, 129.09, 128.87, 128.67, 127.80, 126.96, 123.52, 121.47, 113.45, 112.27, 91.79, 78.41, 71.26, 60.94, 24.22; HR-MS (ESI):  $m/z = 353.11482$ , calcd. for  $\text{C}_{22}\text{H}_{18}\text{NaO}_3$   $[\text{M}+\text{Na}]^+$ : 353.11482.

**2-(2-(4-hydroxybut-1-yn-1-yl)phenoxy)-1-(thiophen-2-yl)ethan-1-one (1j):** The title

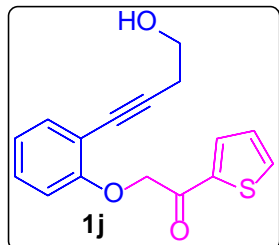

compound was prepared according to the general procedure A as a brown viscous oil;  $^1\text{H}$  NMR (400 MHz,  $\text{CDCl}_3$ )  $\delta$  8.09 (dd,  $J = 3.9, 1.1$  Hz, 1H), 7.72 (dd,  $J = 4.9, 1.1$  Hz, 1H), 7.41 (dd,  $J = 7.6, 1.7$  Hz, 1H), 7.27 – 7.21 (m, 1H), 7.17 (dd,  $J = 4.9, 3.9$  Hz, 1H), 6.95 (td,  $J = 7.5, 1.0$  Hz, 1H), 6.85 (dd,  $J = 8.4, 0.7$  Hz, 1H), 5.15 (s, 2H), 3.83 (m, 2H), 2.73 (t,  $J = 6.0$  Hz, 2H), 2.51 (s, 1H);  $^{13}\text{C}$  NMR (101 MHz,  $\text{CDCl}_3$ )  $\delta$  187.73, 158.37, 134.75, 133.44, 133.39, 129.26, 128.32, 121.65, 112.14, 91.63, 78.53, 71.78, 61.00, 24.21; HR-MS (ESI):  $m/z = 309.05559$ , calcd. for  $\text{C}_{16}\text{H}_{14}\text{NaO}_3\text{S}$   $[\text{M}+\text{Na}]^+$ : 309.05552.

**1-(4-fluorophenyl)-2-(2-(5-hydroxypent-1-yn-1-yl)phenoxy)ethan-1-one (3e):** The title

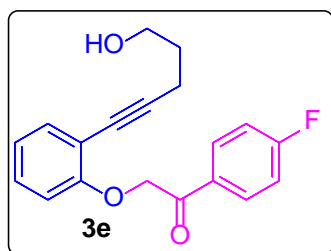

compound was prepared according to the general procedure A as a yellow viscous oil;  $^1\text{H}$  NMR (400 MHz,  $\text{CDCl}_3$ )  $\delta$  8.13 – 8.04 (m, 2H), 7.37 (dd,  $J = 7.6, 1.7$  Hz, 1H), 7.24 – 7.11 (m, 3H), 6.92 (td,  $J = 7.5, 1.0$  Hz, 1H), 6.79 (dd,  $J = 8.4, 0.9$  Hz, 1H), 5.26 (s, 2H), 3.83 (t,  $J = 5.9$  Hz, 2H), 2.57 (t,  $J = 6.8$  Hz, 2H), 2.17 (s, 1H), 1.84 (quin,  $J = 6.8$  Hz, 2H);  $^{13}\text{C}$  NMR (101 MHz,  $\text{CDCl}_3$ )  $\delta$  193.08, 167.58 (d,  $J_F = 254.3$  Hz), 158.34, 133.47, 131.18 (d,  $J_F = 9.5$  Hz), 130.95 (d,  $J_F = 2.7$  Hz), 128.92, 121.63, 115.92 (d,  $J_F = 21.7$  Hz), 113.67, 112.43, 94.26, 71.60, 61.84, 31.08, 16.49; HR-MS (ESI):  $m/z = 335.10539$ , calcd. for  $\text{C}_{19}\text{H}_{17}\text{FNaO}_3$   $[\text{M}+\text{Na}]^+$ : 335.10536.



**4-(2-(2-(5-hydroxypent-1-yn-1-yl)phenoxy)acetyl)benzonitrile (3i):** The title compound was

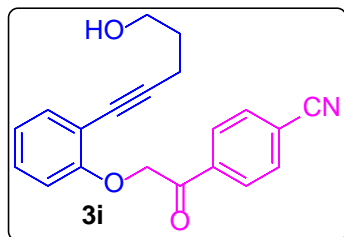

prepared according to the general procedure A as a yellow viscous oil;  $^1\text{H}$  NMR (400 MHz,  $\text{CDCl}_3$ )  $\delta$  8.20 – 8.13 (m, 2H), 7.83 – 7.77 (m, 2H), 7.38 (dd,  $J$  = 7.6, 1.7 Hz, 1H), 7.22 (ddd,  $J$  = 8.3, 7.5, 1.7 Hz, 1H), 6.95 (td,  $J$  = 7.5, 1.0 Hz, 1H), 6.79 (dd,  $J$  = 8.3, 0.8 Hz, 1H), 5.27 (s, 2H), 3.83 (t,  $J$  = 5.9 Hz, 2H), 2.56 (t,  $J$  = 6.8 Hz, 2H), 1.87 – 1.79 (quin,  $J$  = 6.8 Hz, 2H), 1.61 (s, 1H);  $^{13}\text{C}$  NMR (101 MHz,  $\text{CDCl}_3$ )  $\delta$  193.99, 158.03, 137.47, 133.66, 132.51, 129.04, 121.97, 117.75, 117.00, 113.72, 112.42, 94.41, 71.93, 61.96, 31.11, 17.27, 16.55; HR-MS (ESI):  $m/z$  = 342.11006, calcd. for  $\text{C}_{20}\text{H}_{17}\text{NNaO}_3$   $[\text{M}+\text{Na}]^+$ : 342.11002.

**Methyl 4-(2-(2-(5-hydroxypent-1-yn-1-yl)phenoxy)acetyl)benzoate (3j):** The title compound

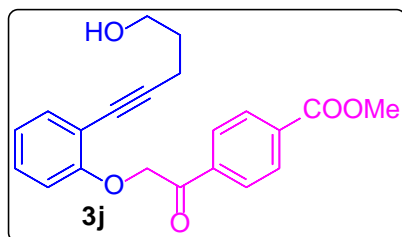

was prepared according to the general procedure A as a yellow solid; M.P. 82 °C ~ 84 °C;  $^1\text{H}$  NMR (400 MHz,  $\text{CDCl}_3$ )  $\delta$  8.17 – 8.07 (m, 4H), 7.37 (dd,  $J$  = 7.6, 1.7 Hz, 1H), 7.24 – 7.16 (m, 1H), 6.93 (td,  $J$  = 7.5, 1.0 Hz, 1H), 6.82 – 6.78 (m, 1H), 5.30 (d,  $J$  = 4.5 Hz, 2H), 3.96 (s, 3H), 3.82 (t,  $J$  = 6.0 Hz, 2H), 2.56 (t,  $J$  = 6.8 Hz, 2H), 2.09 (s, 1H), 1.83 (quin,  $J$  = 6.4 Hz, 2H);  $^{13}\text{C}$  NMR (101 MHz,  $\text{CDCl}_3$ )  $\delta$  194.34, 166.09, 158.25, 137.68, 134.43, 133.54, 129.86, 128.93, 128.37, 121.73, 113.74, 112.47, 94.34, 71.80, 61.88, 52.55, 31.11, 16.50.; HR-MS (ESI):  $m/z$  = 389.1359, calcd. for  $\text{C}_{22}\text{H}_{22}\text{NaO}_5$   $[\text{M}+\text{Na}]^+$ : 389.1356.

**2-(2-(4-hydroxybut-1-yn-1-yl)phenoxy)-1-phenylpropan-1-one (5a):** The title compound was

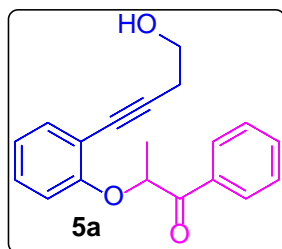

prepared according to the general procedure A as a yellow solid; M.P. 59 °C ~ 61 °C;  $^1\text{H}$  NMR (400 MHz,  $\text{CDCl}_3$ ) 8.10-8.08 (m, 2H), 7.58 (tt,  $J$  = 7.6, 1.2 Hz, 1H), 7.48-7.43 (m, 2H), 7.36 (dd,  $J$  = 7.6, 1.6 Hz), 7.14 (ddd,  $J$  = 8.4, 7.6, 2.0 Hz, 1H), 6.88 (td,  $J$  = 7.2, 0.8 Hz, 1H), 6.77 (d,  $J$  = 8.0 Hz, 1 H), 5.55 (q,  $J$



= 6.8 Hz, 1H), 3.97-3.78 (m, 2H), 2.69 (t,  $J$  = 6.0 Hz, 2H), 2.50 (s, 1H), 1.73 (d,  $J$  = 6.8 Hz, 3H);  $^{13}\text{C}$  NMR (101 MHz,  $\text{CDCl}_3$ )  $\delta$ : 198.55, 158.08, 134.00, 133.66, 133.34, 129.09, 128.90, 128.68, 121.48, 113.83, 113.66, 91.21, 78.88, 60.97, 24.14, 18.79; HR-MS (ESI):  $m/z$  = 295.1335, calcd. for  $\text{C}_{19}\text{H}_{19}\text{O}_3$   $[\text{M}+\text{H}]^+$ : 295.1329.

**2-(2-(4-hydroxybut-1-yn-1-yl)phenoxy)acetonitrile (9a):** The title compound was

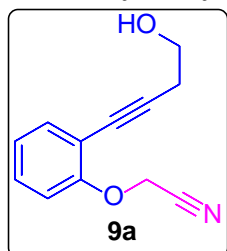

prepared according to the general procedure A as a red viscous oil;  $^1\text{H}$  NMR (400 MHz,  $\text{CDCl}_3$ )  $\delta$  7.44 (dd,  $J$  = 7.6, 1.6 Hz, 1H), 7.29 (t,  $J$  = 7.2 Hz, 1H), 7.07 (t,  $J$  = 7.2 Hz, 1H), 6.99 (d,  $J$  = 7.6 Hz, 1H), 4.85 (s, 2H), 3.83 (q,  $J$  = 6.0

Hz, 2H), 2.73 (t,  $J$  = 6.8 Hz, 2H); 2.1 (t,  $J$  = 6.0 Hz, 1H);  $^{13}\text{C}$  NMR (101 MHz,  $\text{CDCl}_3$ )  $\delta$  157.02, 134.01, 129.42, 123.46, 115.03, 114.37, 114.26, 92.19, 60.96, 54.82, 24.03; HR-MS (ESI):  $m/z$  = 202.0861, calcd. for  $\text{C}_{12}\text{H}_{12}\text{O}_2\text{N}$   $[\text{M}+\text{H}]^+$ : 202.0863.

**Methyl 2-(2-(4-hydroxybut-1-yn-1-yl)phenoxy)acetate (9b):** The title compound was

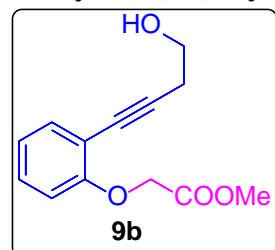

prepared according to the general procedure A as a red viscous oil;  $^1\text{H}$  NMR (400 MHz,  $\text{CDCl}_3$ )  $\delta$  7.36 (d,  $J$  = 7.5 Hz, 1H), 7.18 (dd,  $J$  = 11.5, 4.3 Hz, 1H), 6.89 (t,  $J$  = 7.5 Hz, 1H), 6.73 (d,  $J$  = 8.4 Hz, 1H), 4.64 (s, 2H),

4.21 (q,  $J$  = 7.1 Hz, 2H), 3.77 (t,  $J$  = 6.4 Hz, 2H), 2.66 (t,  $J$  = 6.4 Hz, 2H), 1.23 (t,  $J$  = 7.1 Hz, 3H);  $^{13}\text{C}$  NMR (101 MHz,  $\text{CDCl}_3$ )  $\delta$  168.24, 157.67, 132.79, 128.44, 120.94, 112.89, 111.74, 91.40, 65.18, 60.83, 60.25, 23.44, 13.50; HR-MS (ESI):  $m/z$  = 249.1123, calcd. for  $\text{C}_{14}\text{H}_{17}\text{O}_4\text{N}$   $[\text{M}+\text{H}]^+$ : 249.1121.

**4-phenyl-2,3-dihydronaphtho[1,2-*b*]furan-5-ol (2a):** The title compound was

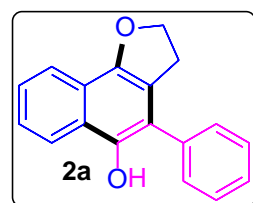

prepared according to the general procedure B on a 0.25 mmol of **1a** to afford an off-white solid (59 mg, 90% yield); M.P. 101 °C ~ 103 °C;  $^1\text{H}$  NMR (400 MHz, D-ACETONE)  $\delta$  8.39 – 8.15 (m, 1H), 7.97 – 7.77 (m, 1H),



7.50 – 7.34 (m, 8H), 4.65 (t,  $J = 8.8$  Hz, 2H), 3.15 (t,  $J = 8.8$  Hz, 2H);  $^{13}\text{C}$  NMR (101 MHz, D-ACETONE)  $\delta$  149.90, 144.09, 138.17, 131.51, 130.10, 128.81, 126.97, 126.94, 126.26, 124.54, 122.58, 122.49, 121.78, 121.17, 72.60, 32.34; HR-MS (ESI):  $m/z = 261.0920$ , calcd. for  $\text{C}_{18}\text{H}_{13}\text{O}_2$   $[\text{M-H}]^-$ : 261.0910.

**4-(*p*-tolyl)-2,3-dihydronaphtho[1,2-*b*]furan-5-ol (2b):** The title compound was

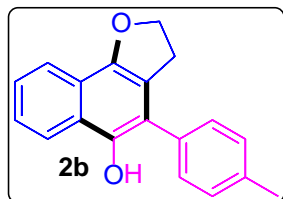

prepared according to the general procedure B on a 0.25 mmol of **1b** to afford an off-white solid (57 mg, 85% yield); M.P. 120 °C ~ 122 °C;  $^1\text{H}$  NMR (400 MHz, D-ACETONE)  $\delta$  8.27 – 8.22 (m, 1H), 7.88 – 7.82 (m, 1H), 7.49 – 7.40 (m, 2H), 7.38 – 7.34 (m, 2H), 7.29 (m,  $J = 3$  Hz), 4.65 (t,  $J = 8.8$  Hz, 2H), 3.16 (t,  $J = 8.8$  Hz, 2H), 2.39 (s, 3H);  $^{13}\text{C}$  NMR (101 MHz, D-ACETONE)  $\delta$  149.83, 144.15, 138.32, 135.08, 131.40, 130.81, 126.88, 126.85, 126.20, 124.54, 122.48, 122.39, 121.71, 121.28, 72.59, 32.39, 21.91; HR-MS (EI) calcd for  $\text{C}_{19}\text{H}_{16}\text{O}_2$  276.1150, found 276.1148.

**4-(*m*-tolyl)-2,3-dihydronaphtho[1,2-*b*]furan-5-ol (2c):** The title compound was

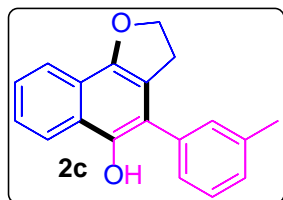

prepared according to the general procedure B on a 0.25 mmol of **1c** to afford a pale-yellow viscous gel (47 mg, 69% yield);  $^1\text{H}$  NMR (400 MHz, D-ACETONE)  $\delta$  8.24 (dd,  $J = 6.8, 2.4$  Hz, 1H), 7.89 – 7.81 (m, 1H), 7.49 – 7.41 (m, 2H), 7.36 (t,  $J = 7.5$  Hz, 1H), 7.28 (ddd,  $J = 8.1, 4.4, 0.9$  Hz, 2H), 7.20 (d,  $J = 7.5$  Hz, 1H), 4.66 (t,  $J = 8.8$  Hz, 2H), 3.16 (t,  $J = 8.8$  Hz, 2H), 2.39 (s, 3H);  $^{13}\text{C}$  NMR (101 MHz, D-ACETONE)  $\delta$  149.84, 144.11, 139.61, 138.02, 132.09, 130.13, 129.57, 128.51, 126.90, 126.22, 124.57, 122.49, 121.77, 121.18, 72.61, 32.39, 22.16; HR-MS (EI) calcd for  $\text{C}_{19}\text{H}_{16}\text{O}_2$  276.1150, found 276.1143.



**4-(3-methoxyphenyl)-2,3-dihydronaphtho[1,2-*b*]furan-5-ol (2d):** The title compound was

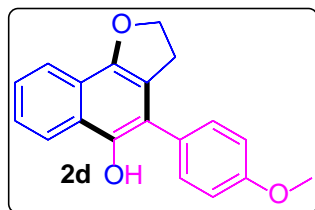

prepared according to the general procedure B on a 0.25 mmol of **1d** to afford an off-white solid (67 mg, 92% yield); M.P. 144 °C ~ 146 °C; <sup>1</sup>H NMR (400 MHz, D-ACETONE) δ 8.24 (dd, *J* = 6.7, 3.0 Hz, 1H), 7.88 – 7.82 (m, 1H), 7.48 – 7.36 (m, 4H), 7.06 – 7.00 (m, 2H), 4.65 (t, *J* = 8.8 Hz, 2H), 3.85

(s, 3H), 3.16 (t, *J* = 8.8 Hz, 2H); <sup>13</sup>C NMR (101 MHz, D-ACETONE) δ 160.61, 149.77, 144.23, 132.66, 130.02, 126.82, 126.78, 126.16, 124.52, 122.46, 122.13, 121.64, 121.44, 115.57, 72.57, 56.19, 32.40; HR-MS (EI) calcd for C<sub>19</sub>H<sub>16</sub>O<sub>3</sub> 292.1099, found 292.1093.

**4-(4-fluorophenyl)-2,3-dihydronaphtho[1,2-*b*]furan-5-ol (2e):** The title compound was

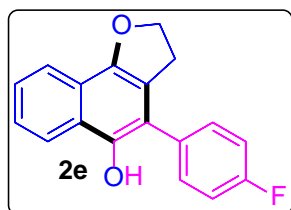

prepared according to the general procedure B on a 0.25 mmol of **1e** to afford an off-white solid (49 mg, 71% yield); M.P. 138 °C ~ 140 °C; <sup>1</sup>H NMR (400 MHz, D-ACETONE) δ 8.25 (dd, *J* = 6.8, 2.5 Hz, 1H), 7.91 –

7.78 (m, 1H), 7.57 – 7.39 (m, 5H), 7.24 (ddd, *J* = 8.9, 5.9, 2.5 Hz, 2H), 4.66 (t, *J* = 8.8 Hz, 2H), 3.16 (t, *J* = 8.8 Hz, 2H); <sup>13</sup>C NMR (101 MHz, D-ACETONE) δ 164.10 (d, *J<sub>F</sub>* = 242 Hz), 149.96, 144.26, 134.42, 133.58 (d, *J<sub>F</sub>* = 8.2 Hz), 127.03, 126.34, 124.52, 122.53, 121.85, 121.72, 121.66, 121.19, 116.80 (d, *J<sub>F</sub>* = 21.2 Hz), 72.63; HR-MS (EI) calcd for C<sub>18</sub>H<sub>13</sub>FO<sub>2</sub> 280.0900, found 280.0909.

**4-(4-chlorophenyl)-2,3-dihydronaphtho[1,2-*b*]furan-5-ol (2f):** The title compound was

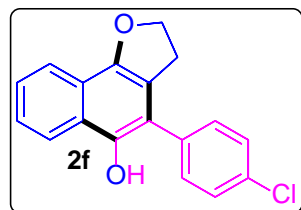

prepared according to the general procedure B on a 0.25 mmol of **1f** to afford an off-white solid (55mg, 75% yield); M.P. 93 °C ~ 95 °C; <sup>1</sup>H NMR (400 MHz, D-ACETONE) δ 8.25 (dd, *J* = 7.2, 2.4 Hz 1H), 7.86

(dd, *J* = 6.8, 2.0 Hz, 1H), 7.58 (s, 1H), 7.55 – 7.43 (m, 6H), 4.68 (t, *J* = 8.8 Hz, 2H), 3.19 (t, *J* = 8.8 Hz, 2H); <sup>13</sup>C NMR (101 MHz, D-ACETONE) δ 150.06, 144.24, 137.16, 134.15, 133.39,



130.12, 127.14, 127.09, 126.41, 124.53, 122.55, 121.94, 121.55, 120.96, 72.66, 32.25, 31.07; HR-MS (ESI):  $m/z = 295.05313$ , calcd. for  $C_{18}H_{12}ClO_2$   $[M-H]^-$ : 295.05291.

**Methyl 4-(5-hydroxy-2,3-dihydronaphtho[1,2-*b*]furan-4-yl)benzoate (2g):** The title compound

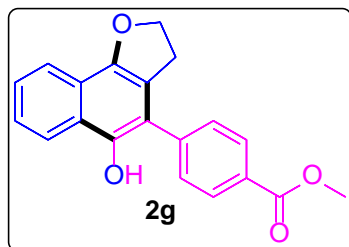

was prepared according to the general procedure B on a 0.25 mmol of **1g** to afford an off-white solid (50 mg, 63% yield); M.P. 168 °C ~ 170 °C;  $^1H$  NMR (400 MHz, D-ACETONE)  $\delta$  8.27 (dd,  $J = 7.1, 2.1$  Hz, 1H), 8.10 (d,  $J = 8.3$  Hz, 2H), 7.88 (dd,  $J = 6.9, 2.2$  Hz, 1H),

7.69 – 7.59 (m, 3H), 7.52 – 7.44 (m, 2H), 4.68 (t,  $J = 8.8$  Hz, 2H), 3.92 (s, 3H), 3.19 (t,  $J = 8.8$  Hz, 2H);  $^{13}C$  NMR (101 MHz, D-ACETONE)  $\delta$  167.81, 150.23, 144.19, 143.47, 131.88, 130.97, 130.50, 127.28, 127.18, 126.50, 124.53, 122.60, 122.07, 121.99, 120.73, 72.69, 53.04, 32.26; HR-MS (ESI):  $m/z = 321.1113$ , calcd. for  $C_{20}H_{17}O_4$   $[M+H]^+$ : 321.1121.

**4-(3,4-dichlorophenyl)-2,3-dihydronaphtho[1,2-*b*]furan-5-ol (2h):** The title compound was

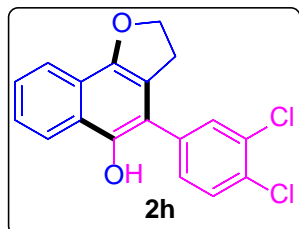

prepared according to the general procedure B on a 0.25 mmol of **1h** to afford an off-white solid (55 mg, 67% yield); M.P. 140 °C ~ 142 °C;  $^1H$  NMR (400 MHz, D-ACETONE)  $\delta$  8.30 – 8.17 (m, 1H), 7.93 – 7.78 (m, 1H), 7.76 (s, 1H), 7.68 (dd,  $J = 10.3, 5.1$  Hz, 2H), 7.56 – 7.39 (m, 3H),

4.68 (t,  $J = 8.8$  Hz, 2H), 3.21 (t,  $J = 8.8$  Hz, 2H);  $^{13}C$  NMR (101 MHz, D-ACETONE)  $\delta$  150.20, 144.36, 144.25, 139.14, 133.67, 133.29, 132.15, 131.84, 127.39, 127.12, 126.56, 124.54, 122.60, 122.14, 120.70, 120.49, 72.73, 32.13; HR-MS (EI) calcd for  $C_{18}H_{12}Cl_2O_2$  280.0900, found 330.0207.



**4-(naphthalen-2-yl)-2,3-dihydronaphtho[1,2-*b*]furan-5-ol (2i):** The title compound was

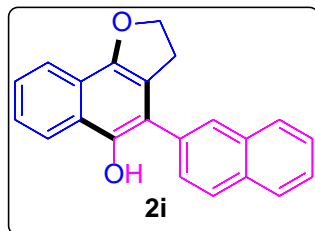

prepared according to the general procedure B on a 0.25 mmol of **1i** to afford a pale yellow solid (62 mg, 80% yield); M.P. 123 °C ~ 125 °C; <sup>1</sup>H NMR (400 MHz, D-ACETONE) δ 8.29 (dd, *J* = 7.2, 2.4 Hz, 1H), 8.03 – 7.93 (m, 4H), 7.89 (dd, *J* = 6.8, 2.3 Hz, 1H), 7.58 (m, 4H), 7.53 –

7.44 (m, 2H), 4.69 (t, *J* = 8.8 Hz, 2H), 3.23 (t, *J* = 8.8 Hz, 2H); <sup>13</sup>C NMR (101 MHz, D-ACETONE) δ 149.91, 144.45, 135.75, 135.25, 134.28, 130.48, 129.74, 129.67, 129.59, 129.17, 127.66, 127.60, 127.04, 126.98, 126.30, 124.63, 122.52, 122.27, 121.90, 121.28, 111.52, 72.66, 32.37; HR-MS (EI) calcd for C<sub>22</sub>H<sub>16</sub>O<sub>2</sub> 312.1150, found 312.1158.

**4-(thiophen-2-yl)-2,3-dihydronaphtho[1,2-*b*]furan-5-ol (2j):** The title compound was

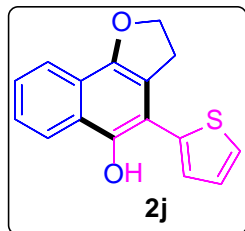

prepared according to the general procedure B on a 0.25 mmol of **1j** to afford an off-white solid (43mg, 64% yield) <sup>1</sup>H NMR (400 MHz, D-ACETONE) δ 8.25 (s, 1H), 7.91 – 7.70 (m, 2H), 7.65 – 7.40 (m, 3H), 7.33 (s, 1H), 7.19 (dd, *J* = 5.1, 3.6 Hz, 10H), 4.70 (m, , 20H), 3.39 (m, 2H); HR-MS (ESI): *m/z*

= 267.04852, calcd. for C<sub>16</sub>H<sub>11</sub>O<sub>2</sub>S [M-H]<sup>-</sup>: 267.04855.

**5-phenyl-3,4-dihydro-2*H*-benzo[*h*]chromen-6-ol (4a):** The title compound

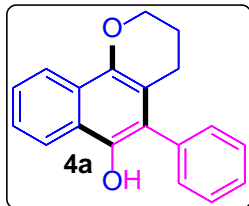

was prepared according to the general procedure B on a 0.25 mmol of **3a** to afford a yellow sticky mass (56 mg, 83% yield); <sup>1</sup>H NMR (400 MHz, D-ACETONE) δ 8.23 – 8.09 (m, 2H), 7.51 – 7.36 (m, 5H), 7.33 – 7.30 (m,

2H), 6.91 (s, 1H), 4.24 (t, *J* = 5.2 Hz, 2H), 2.39 (t, *J* = 6.5 Hz, 2H), 1.97 – 1.90 (m, 2H); <sup>13</sup>C NMR (101 MHz, D-ACETONE) δ 144.93, 143.53, 137.83, 132.16, 130.28, 128.98, 126.93, 126.76, 126.34, 126.16, 124.67, 123.66, 122.57, 116.46, 67.20, 25.69, 24.00; HR-MS (ESI): *m/z* = 275.1066, calcd. for C<sub>19</sub>H<sub>15</sub>O<sub>2</sub> [M-H]<sup>-</sup>: 275.1066.



**5-(*p*-tolyl)-3,4-dihydro-2*H*-benzo[*h*]chromen-6-ol (4b):** The title compound was

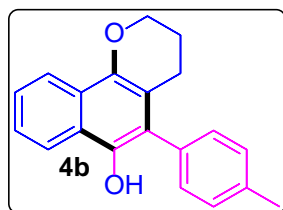

prepared according to the general procedure B on a 0.25 mmol of **3b** to

afford an off-white solid (62 mg, 85% yield); M.P. 142 °C ~ 144 °C; <sup>1</sup>H

NMR (400 MHz, D-ACETONE) δ 8.22 – 8.15 (m, 1H), 8.11 (ddd, *J* =

4.8, 2.3, 0.5 Hz, 1H), 7.49 – 7.41 (m, 2H), 7.34 – 7.27 (m, 2H), 7.23 – 7.17 (m, 2H), 6.83 (s, 1H),

4.25 (t, *J* = 5.2 Hz, 2H), 2.44 – 2.37 (m, 5H), 1.99 – 1.91 (m, 2H); <sup>13</sup>C NMR (101 MHz, D-

ACETONE) δ 144.89, 143.65, 138.48, 134.67, 132.07, 131.01, 126.89, 126.70, 126.30, 126.08,

124.44, 124.36, 123.68, 122.56, 116.66, 67.22, 25.73, 24.06, 21.94; HR-MS (ESI): *m/z* =

289.1224, calcd. for C<sub>20</sub>H<sub>17</sub>O<sub>2</sub> [M-H]<sup>-</sup>: 289.1223.

**5-(2-methoxyphenyl)-3,4-dihydro-2*H*-benzo[*h*]chromen-6-ol (4c):** The title compound was

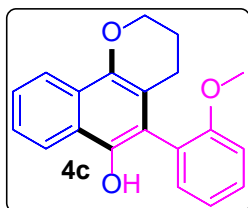

prepared according to the general procedure B on a 0.25 mmol of **3c** to

afford an off-white solid (58 mg, 76% yield); M.P. 106 °C ~ 107 °C; <sup>1</sup>H

NMR (400 MHz, CDCl<sub>3</sub>) δ 8.26 – 8.05 (m, 2H), 7.51 – 7.40 (m, 3H), 7.25

(dd, *J* = 7.6, 1.6 Hz, 1H), 7.14 – 7.05 (m, 2H), 4.96 (s, 1H), 4.34-4.25 (m, 2H), 3.78 (s, 3H), 2.51

– 2.36 (m, 2H), 2.04 – 1.95 (m, 2H); <sup>13</sup>C NMR (101 MHz, CDCl<sub>3</sub>) δ 157.61, 143.72, 141.56,

132.37, 130.04, 125.61, 125.45, 125.04, 123.52, 123.29, 122.07, 121.41, 121.14, 118.42, 115.19,

111.63, 66.01, 55.64, 23.61, 22.61; HR-MS (ESI): *m/z* = 307.1327, calcd. for C<sub>20</sub>H<sub>19</sub>O<sub>3</sub> [M+H]<sup>+</sup>:

307.1329.

**5-(4-methoxyphenyl)-3,4-dihydro-2*H*-benzo[*h*]chromen-6-ol (4d):** The title compound was

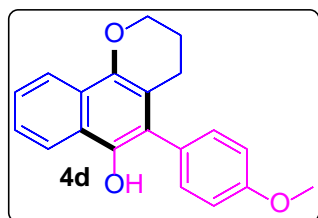

prepared according to the general procedure B on a 0.25 mmol of **3d** to

afford as light yellow solid (66 mg, 87% yield); M.P. 175 °C ~ 177

°C; <sup>1</sup>H NMR (400 MHz, D-ACETONE) δ 8.19 (ddd, *J* = 4.1, 2.4, 0.6

Hz, 1H), 8.14 – 8.07 (m, 1H), 7.49 – 7.40 (m, 2H), 7.23 (dt, *J* = 8.8, 2.8 Hz, 2H), 7.04 (dt, *J* = 8.8,



2.8 Hz, 2H), 4.25 (t,  $J = 5.2$  Hz, 2H), 3.86 (s, 3H), 2.41 (t,  $J = 6.5$  Hz, 2H), 1.99 – 1.90 (m, 2H);  $^{13}\text{C}$  NMR (101 MHz, D-ACETONE)  $\delta$  160.80, 144.83, 143.88, 133.32, 129.49, 126.87, 126.68, 126.27, 125.99, 124.08, 123.69, 122.55, 116.91, 115.79, 67.20, 56.20, 25.74, 24.08; HR-MS (ESI):  $m/z = 307.1324$ , calcd. for  $\text{C}_{20}\text{H}_{19}\text{O}_3$   $[\text{M}+\text{H}]^+$ : 307.1329.

**5-(4-fluorophenyl)-3,4-dihydro-2H-benzo[*h*]chromen-6-ol (4e):** The title compound was

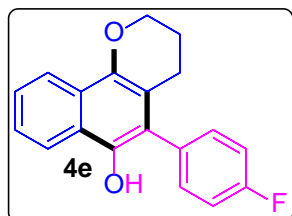

prepared according to the general procedure B on a 0.25 mmol of **3e** to afford an off-white solid (49 mg, 68% yield); M.P. 127 °C ~ 129 °C;  $^1\text{H}$  NMR (400 MHz, D-ACETONE)  $\delta$  8.16 (dddd,  $J = 7.7, 4.3, 1.8, 0.6$  Hz,

2H), 7.50 – 7.43 (m, 2H), 7.38 – 7.32 (m, 2H), 7.25 (ddd,  $J = 8.9, 5.8, 2.5$  Hz, 2H), 7.10 (s, 1H), 4.25 (t,  $J = 5.2$  Hz, 2H), 2.40 (t,  $J = 6.5$  Hz, 2H), 1.99 – 1.92 (m, 2H);  $^{13}\text{C}$  NMR (101 MHz, D-ACETONE)  $\delta$  163.83 (d,  $J_{\text{CF}} = 242$  Hz), 144.97, 143.85, 134.18 (d,  $J_{\text{CF}} = 8.1$  Hz), 134.04, 127.03, 126.88, 126.42, 126.21, 123.67, 122.59, 117.01 (d,  $J_{\text{CF}} = 21.0$  Hz), 116.51, 67.21, 25.68, 24.02; HR-MS (ESI):  $m/z = 295.1130$ , calcd. for  $\text{C}_{19}\text{H}_{16}\text{O}_2\text{F}$   $[\text{M}+\text{H}]^+$ : 295.1129.

**5-(2-chlorophenyl)-3,4-dihydro-2H-benzo[*h*]chromen-6-ol (4f):** The title compound was

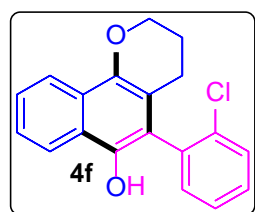

prepared according to the general procedure B on a 0.25 mmol of **3f** to afford an off-white solid (56 mg, 73% yield); M.P. 63 °C ~ 65 °C;  $^1\text{H}$  NMR (400 MHz, D-ACETONE)  $\delta$  8.25 – 8.19 (m, 1H), 8.16 – 8.11 (m, 1H), 7.59 – 7.53

(m, 1H), 7.52 – 7.45 (m, 2H), 7.45 – 7.39 (m, 2H), 7.36 (dt,  $J = 4.9, 3.1$  Hz, 1H), 7.32 (s, 1H), 4.26 (t,  $J = 4.8$  Hz, 2H), 2.34 (t,  $J = 6.5$  Hz, 2H), 2.02 – 1.93 (m, 2H);  $^{13}\text{C}$  NMR (101 MHz, D-ACETONE)  $\delta$  144.95, 143.89, 136.97, 136.32, 134.25, 131.15, 130.99, 128.91, 127.30, 126.96, 126.34, 126.29, 123.69, 122.62, 122.15, 116.45, 67.26, 24.90, 23.93; HR-MS (ESI):  $m/z = 311.0825$ , calcd. for  $\text{C}_{19}\text{H}_{16}\text{O}_2\text{Cl}$   $[\text{M}+\text{H}]^+$ : 311.0833.



**5-(4-chlorophenyl)-3,4-dihydro-2H-benzo[h]chromen-6-ol (4g):** The title compound was

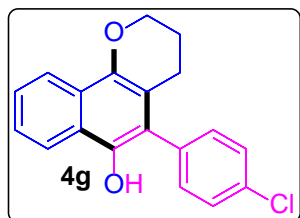

prepared according to the general procedure B on a 0.25 mmol of **3g** to

afford an off-white solid (60 mg, 78% yield); M.P. 150 °C ~ 152 °C; <sup>1</sup>H

NMR (400 MHz, D-ACETONE) δ 8.23 – 8.17 (m, 1H), 8.14 – 8.09 (m,

1H), 7.53 – 7.43 (m, 4H), 7.34 (dt, *J* = 8.4, 2.4 Hz, 2H), 7.21 (s, 1H), 4.26 (t, *J* = 5.2 Hz, 2H), 2.40

(t, *J* = 6.5 Hz, 2H), 2.01 – 1.92 (m, 2H); <sup>13</sup>C NMR (101 MHz, D-ACETONE) δ 145.04, 143.75,

143.64, 136.89, 134.41, 134.09, 130.32, 127.10, 126.96, 126.48, 126.30, 123.69, 123.58, 123.51,

122.63, 116.24, 111.55, 67.23, 25.68, 24.01; HR-MS (ESI): *m/z* = 309.0687, calcd. for

C<sub>19</sub>H<sub>14</sub>O<sub>2</sub>Cl [M-H]<sup>-</sup>: 309.0677.

**5-(3,4-dichlorophenyl)-3,4-dihydro-2H-benzo[h]chromen-6-ol (4h):** The title compound was

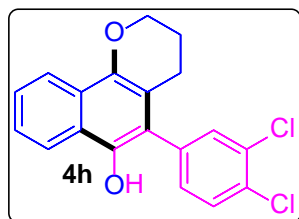

prepared according to the general procedure B on a 0.25 mmol of **3h** to

afford an off-white solid (59 mg, 69% yield); M.P. 158 °C ~ 162 °C; <sup>1</sup>H

NMR (400 MHz, D-ACETONE) δ 8.23 – 8.09 (m, 2H), 7.67 (d, *J* = 8.2

Hz, 1H), 7.54 (d, *J* = 2.0 Hz, 1H), 7.53 – 7.44 (m, 3H), 7.32 (dd, *J* = 8.2, 2.0 Hz, 1H), 4.27 (dd, *J*

= 5.7, 4.5 Hz, 2H), 2.44 (t, *J* = 6.5 Hz, 2H), 2.02 – 1.94 (m, 2H); <sup>13</sup>C NMR (101 MHz, D-

ACETONE) δ 145.08, 143.86, 138.98, 134.37, 133.47, 132.61, 132.36, 132.31, 127.26, 127.17,

126.59, 126.34, 123.70, 122.64, 122.55, 115.93, 67.23, 25.60, 23.94; HR-MS (ESI): *m/z* =

345.0438, calcd. for C<sub>19</sub>H<sub>15</sub>O<sub>2</sub>Cl<sub>2</sub> [M+H]<sup>+</sup>: 345.0444.

**4-(6-hydroxy-3,4-dihydro-2H-benzo[h]chromen-5-yl)benzonitrile (4i):** The title compound

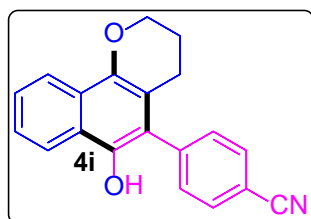

was prepared according to the general procedure B on a 0.25 mmol of

**3i** to afford an off-white solid (47 mg, 63% yield); M.P. 218 °C ~

220 °C; <sup>1</sup>H NMR (400 MHz, D-ACETONE) δ 8.21 (ddd, *J* = 6.4, 2.2,

0.6 Hz, 1H), 8.16 – 8.09 (m, 1H), 7.88 (dt, *J* = 8.4, 1.6 Hz, 2H), 7.57 (dt, *J* = 8.4, 1.6 Hz, 2H), 7.54



– 7.45 (m, 2H), 7.42 (s, 1H), 4.29 (t,  $J = 5.2$  Hz, 2H), 2.41 (t,  $J = 6.5$  Hz, 2H), 2.01 – 1.93 (m, 2H);  $^{13}\text{C}$  NMR (101 MHz, D-ACETONE)  $\delta$  145.27, 144.72, 143.76, 138.96, 133.85, 133.53, 129.39, 127.29, 127.20, 126.68, 126.51, 125.36, 123.83, 123.64, 123.12, 122.73, 121.80, 120.16, 115.72, 114.95, 112.58, 112.49, 111.56, 67.28, 25.63, 23.92; HR-MS (ESI):  $m/z = 300.1030$ , calcd. for  $\text{C}_{20}\text{H}_{14}\text{NO}_2$   $[\text{M}-\text{H}]^-$ : 300.1031.

**Methyl 4-(6-hydroxy-3,4-dihydro-2H-benzo[*h*]chromen-5-yl)benzoate (4j)** : The title

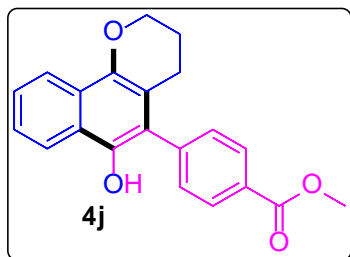

compound was prepared according to the general procedure B on a 0.25 mmol of **3j** to afford an off-white solid (51 mg, 62% yield); M.P. 170 °C ~ 173 °C;  $^1\text{H}$  NMR (400 MHz, D-ACETONE)  $\delta$  8.24 – 8.19 (m, 1H), 8.16 – 7.99 (m, 3H), 7.53 – 7.45 (m, 4H), 7.24 (s, 1H), 4.27

(t,  $J = 5.2$  Hz, 2H), 3.93 (s, 3H), 2.42 (t,  $J = 6.5$  Hz, 2H), 2.01 – 1.91 (m, 2H);  $^{13}\text{C}$  NMR (101 MHz, D-ACETONE)  $\delta$  167.88, 145.13, 143.41, 132.61, 131.14, 130.79, 127.15, 127.03, 126.55, 126.41, 124.17, 123.65, 122.67, 115.95, 111.54, 67.25, 53.06, 25.65, 23.95; HR-MS (ESI):  $m/z = 334.1200$ , calcd. for  $\text{C}_{21}\text{H}_{18}\text{O}_4$   $[\text{M}+\text{H}]^+$ : 334.1200.

**5-(naphthalen-2-yl)-3,4-dihydro-2H-benzo[*h*]chromen-6-ol (4k)**: The title compound was

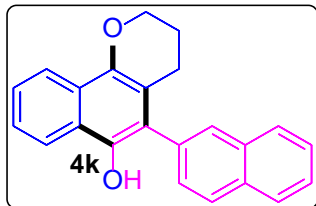

prepared according to the general procedure B on a 0.25 mmol of **3k** to afford an off-white solid (65 mg, 80% yield); M.P. 157 °C ~ 159 °C;

$^1\text{H}$  NMR (400 MHz,  $\text{CDCl}_3$ )  $\delta$  8.18 (dd,  $J = 6.5, 2.2$  Hz, 2H), 7.99 (d,  $J = 8.4$  Hz, 1H), 7.94 – 7.84 (m, 3H), 7.58 – 7.47 (m, 4H), 7.43 (dd,  $J = 8.3, 1.6$  Hz, 1H), 5.00 (s, 1H), 4.35 – 4.23 (m, 2H), 2.48 (qt,  $J = 17.0, 6.5$  Hz, 2H), 2.04 – 1.92 (m, 2H);  $^{13}\text{C}$  NMR (101 MHz,  $\text{CDCl}_3$ )  $\delta$  143.80, 141.45, 133.69, 132.88, 132.58, 129.52, 129.29, 128.29, 127.94, 127.84, 126.62, 126.61, 125.84, 125.42, 125.33, 123.37, 122.03, 121.44, 121.18, 114.42, 66.00, 24.28, 22.59; HR-MS (ESI):  $m/z = 327.1382$ , calcd. for  $\text{C}_{23}\text{H}_{19}\text{O}_2$   $[\text{M}+\text{H}]^+$ : 327.1380.



**5-(thiophen-2-yl)-3,4-dihydro-2H-benzo[*h*]chromen-6-ol (4l):** The title compound was

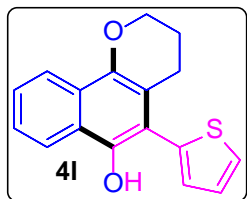

prepared according to the general procedure B on a 0.25 mmol of **3l** to afford an off-white solid (44 mg, 61% yield); M.P. 82 °C ~ 84 °C; <sup>1</sup>H NMR (400 MHz, CDCl<sub>3</sub>) δ 8.19 – 8.12 (m, 2H), 7.54 (dd, *J* = 5.2, 0.8 Hz, 1H), 7.49 (tt, *J* = 7.9, 3.4 Hz, 2H), 7.22 (dd, *J* = 5.2, 3.4 Hz, 1H), 7.08 (d, *J* = 2.6 Hz, 1H), 5.33 (s, 8H), 4.29 (t, *J* = 5.2 Hz, 2H), 2.60 (t, *J* = 6.5 Hz, 2H), 2.06 – 1.97 (m, 2H); <sup>13</sup>C NMR (101 MHz, CDCl<sub>3</sub>) δ 143.65, 143.45, 129.00, 128.00, 127.92, 126.39, 125.42, 122.27, 121.19, 115.12, 113.37, 65.98, 24.00, 22.56; HR-MS (ESI): *m/z* = 283.0788, calcd. for C<sub>17</sub>H<sub>15</sub>O<sub>2</sub>S [M+H]<sup>+</sup>: 283.0787.

**9-methyl-5-phenyl-3,4-dihydro-2H-benzo[*h*]chromen-6-ol (4n):** The title compound was

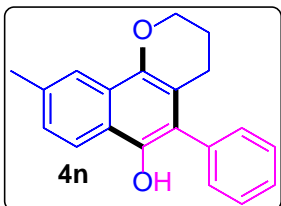

prepared according to the general procedure B on a 0.25 mmol of **3n** to afford an off-white solid (57 mg, 79% yield); M.P. 124 °C ~ 127 °C; <sup>1</sup>H NMR (400 MHz, D-ACETONE) δ 8.09 (d, *J* = 8.5 Hz, 1H), 7.90 (s, 1H), 7.51 – 7.44 (m, 2H), 7.42 – 7.38 (tt, *J* = 6.8, 2.8 Hz, 1H), 7.32– 7.28 (m, 3H), 6.82 (s, 1H), 4.25 (dd, *J* = 10.1, 5.0 Hz, 2H), 2.50 (s, 3H), 2.39 (t, *J* = 6.5 Hz, 2H), 1.97 – 1.90 (m, 2H); <sup>13</sup>C NMR (101 MHz, D-ACETONE) δ 144.57, 143.60, 137.98, 136.27, 132.26, 130.26, 128.92, 128.38, 127.15, 124.44, 123.77, 123.70, 121.74, 116.50, 67.15, 25.74, 24.09, 22.55; HR-MS (ESI): *m/z* = 289.1234, calcd. for C<sub>20</sub>H<sub>17</sub>O<sub>2</sub> [M-H]<sup>-</sup>: 289.1235.

**9-fluoro-5-phenyl-3,4-dihydro-2H-benzo[*h*]chromen-6-ol (4o):** The title compound was

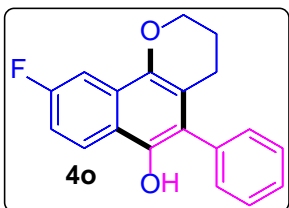

prepared according to the general procedure B on a 0.25 mmol of **3n** to afford an off-white sticky mass (36 mg, 51% yield); <sup>1</sup>H NMR (400 MHz, D-ACETONE) δ 8.25 (dd, *J* = 9.2, 5.8 Hz, 1H), 7.69 (dd, *J* = 11.0, 2.6 Hz, 1H), 7.51 – 7.46 (m, 2H), 7.41 (dt, *J* = 9.6, 4.4 Hz, 1H), 7.35 – 7.31 (m, 2H), 7.28 (ddd, *J* = 9.1, 8.5, 2.7 Hz, 1H), 7.09 (s, 1H), 4.26 (t, *J* = 5.2 Hz, 2H), 2.40 (t, *J* = 6.5 Hz, 2H), 1.97 – 1.91



(m, 2H);  $^{13}\text{C}$  NMR (101 MHz, D-ACETONE)  $\delta$  162.46 (d,  $J_F = 241.2$  Hz), 144.44 (d,  $J_F = 5.0$  Hz), 143.80, 137.50, 132.21, 130.35, 129.13, 127.76 (d,  $J_F = 8.8$  Hz), 126.91 (d,  $J_F = 9.1$  Hz), 124.17, 123.28, 118.29, 115.96 (d,  $J_F = 25.2$  Hz), 106.27, 106.05, 67.33, 25.71, 23.92; HR-MS (ESI):  $m/z = 293.0982$ , calcd. for  $\text{C}_{29}\text{H}_{14}\text{FO}_2$   $[\text{M-H}]^-$ : 293.0983.

**9-chloro-5-phenyl-3,4-dihydro-2H-benzo[h]chromen-6-ol (4p):** The title compound was

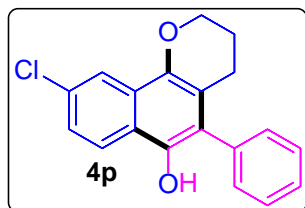

prepared according to the general procedure B on a 0.25 mmol of **3p** to afford an off-white solid (52 mg, 67% yield); M.P. 116 °C ~ 118 °C;  $^1\text{H}$  NMR (400 MHz,  $\text{CDCl}_3$ )  $\delta$  8.14 (s, 1H), 8.09 (d,  $J = 8.9$  Hz, 1H), 7.54

(t,  $J = 7.2$  Hz, 2H), 7.47 (d,  $J = 7.3$  Hz, 1H), 7.39 (d,  $J = 10.0$  Hz, 1H), 7.34 (d,  $J = 7.2$  Hz, 2H), 4.90 (s, 1H), 4.28 (t,  $J = 4.8$  Hz, 2H), 2.44 (t,  $J = 6.4$  Hz, 2H), 2.03 – 1.93 (m, 2H);  $^{13}\text{C}$  NMR (101 MHz,  $\text{CDCl}_3$ )  $\delta$  143.02, 141.36, 134.64, 131.96, 130.49, 129.58, 128.44, 125.99, 123.96, 121.94, 121.58, 120.51, 115.82, 66.04, 24.21, 22.50; HR-MS (ESI):  $m/z = 311.0832$ , calcd. for  $\text{C}_{19}\text{H}_{16}\text{O}_2\text{Cl}$   $[\text{M+H}]^+$ : 311.0833.

**9-bromo-5-phenyl-3,4-dihydro-2H-benzo[h]chromen-6-ol (4q):** The title compound was

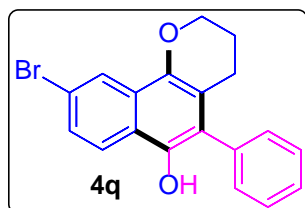

prepared according to the general procedure B on a 0.25 mmol of **3q** to afford an off-white solid (62 mg, 71% yield); M.P. 153 °C ~ 154 °C;  $^1\text{H}$  NMR (400 MHz,  $\text{CDCl}_3$ )  $\delta$  8.32 (d,  $J = 1.6$  Hz, 1H), 8.02 (d,  $J = 8.9$  Hz,

1H), 7.52 (ddd,  $J = 19.6, 14.8, 7.3$  Hz, 4H), 7.34 (d,  $J = 7.0$  Hz, 2H), 4.89 (s, 1H), 4.27 (t,  $J = 5.2$  Hz, 2H), 2.44 (t,  $J = 6.5$  Hz, 2H), 2.05 – 1.91 (m, 2H);  $^{13}\text{C}$  NMR (101 MHz,  $\text{CDCl}_3$ )  $\delta$  142.90, 141.37, 134.60, 130.43, 129.58, 128.49, 128.45, 126.37, 124.03, 123.76, 122.08, 121.75, 120.26, 115.81, 66.02, 24.19, 22.46; HR-MS (ESI):  $m/z = 327.1382$ , calcd. for  $\text{C}_{19}\text{H}_{14}\text{O}_2\text{Br}$   $[\text{M-H}]^-$ : 327.1380.



**5-methyl-4-phenyl-2,3-dihydronaphtho[1,2-*b*]furan (7a):** The title compound was

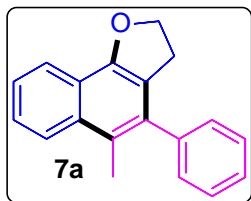

prepared according to the general procedure B on a 0.25 mmol of **5a** to

afford a light yellow solid (42 mg, 65% yield); M.P. 128 °C ~ 130 °C; <sup>1</sup>H

NMR (400 MHz, CDCl<sub>3</sub>) δ 8.01 (td, *J* = 8.3, 1.4 Hz, 2H), 7.54 – 7.41 (m,

4H), 7.41 – 7.33 (m, 1H), 7.32 – 7.26 (m, 2H), 4.71 (t, *J* = 8.9 Hz, 2H), 3.10 (t, *J* = 8.9 Hz, 2H),

2.42 (s, 3H); <sup>13</sup>C NMR (101 MHz, CDCl<sub>3</sub>) δ 153.14, 140.68, 136.54, 132.96, 129.24, 128.20,

126.86, 125.83, 124.87, 124.86, 123.04, 121.79, 120.03, 119.59, 71.55, 31.02, 15.69; HR-MS

(ESI): *m/z* = 261.12740, calcd. for C<sub>19</sub>H<sub>17</sub>O [M+H]<sup>+</sup>: 261.12739.

**6-methyl-5-phenyl-3,4-dihydro-2H-benzo[*h*]chromene (7b):** The title compound was prepared

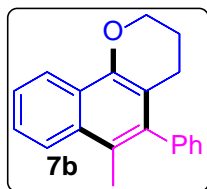

according to the general procedure B on a 0.25 mmol of **5b** to afford a yellow

viscous oil (38 mg, 55% yield); <sup>1</sup>H NMR (400 MHz, CDCl<sub>3</sub>) δ 8.28 – 8.21 (m,

1H), 8.01 – 7.94 (m, 1H), 7.53 – 7.46 (m, 2H), 7.43 (d, *J* = 7.5 Hz, 2H), 7.37 (d,

*J* = 7.4 Hz, 1H), 7.21 – 7.17 (m, 2H), 4.29 (t, *J* = 5.2 Hz, 2H), 2.38 (t, *J* = 6.5 Hz, 2H), 2.28 (s,

3H), 1.96 (dd, *J* = 11.1, 5.9 Hz, 2H); <sup>13</sup>C NMR (101 MHz, CDCl<sub>3</sub>) δ 141.09, 139.81, 131.91,

129.41, 128.27, 126.67, 125.81, 124.79, 124.13, 121.71, 114.87, 66.10, 24.66, 22.68, 15.91; HR-

MS (ESI): *m/z* = 275.1422, calcd. for C<sub>20</sub>H<sub>19</sub>O [M+H]<sup>+</sup>: 275.1430.

**5,6-diphenyl-3,4-dihydro-2H-benzo[*h*]chromene (7c) :** The title compound was prepared

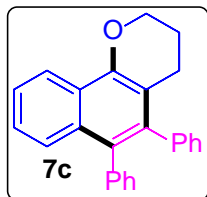

according to the general procedure B on a 0.25 mmol of **5c** to afford a yellow

viscous oil (37 mg, 45% yield); <sup>1</sup>H NMR (400 MHz, CDCl<sub>3</sub>) δ 7.90 – 7.84 (m,

1H), 7.73 (d, *J* = 7.9 Hz, 1H), 7.59 (td, *J* = 7.6, 1.3 Hz, 1H), 7.28 – 7.24 (m,

11H), 4.19 (t, *J* = 5.2 Hz, 2H), 2.02 – 1.92 (m, 2H), 1.69 (t, *J* = 6.4 Hz, 2H); <sup>13</sup>C NMR (101 MHz,

CDCl<sub>3</sub>) δ 144.00, 141.08, 135.25, 134.24, 129.84, 128.83, 128.11, 127.87, 127.34, 127.17, 121.52,



114.15, 65.83, 23.61, 22.62; HR-MS (ESI):  $m/z = 336.1522$ , calcd. for  $C_{25}H_{20}O$   $[M+H]^+$ : 336.1509.

**12,13-dihydro-11H-benzo[*h*]naphtho[1,2-*f*]chromene (7d):** The title compound was prepared

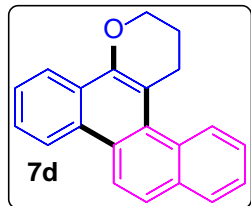

according to the general procedure B on a 0.25 mmol of **5d** to afford a yellow viscous oil (36 mg, 51% yield);  $^1H$  NMR (400 MHz,  $CDCl_3$ )  $\delta$  9.00 (dd,  $J = 9.4, 3.0$  Hz, 2H), 8.43 – 8.36 (m, 1H), 7.98 (dd,  $J = 7.9, 1.5$  Hz, 1H), 7.90 (s,

2H), 7.67 – 7.57 (m, 3H), 7.54 (ddd,  $J = 7.9, 6.9, 1.1$  Hz, 1H), 4.43 (t,  $J = 5.2$  Hz, 2H), 3.17 (t,  $J = 6.6$  Hz, 2H), 2.35 – 2.23 (m, 2H);  $^{13}C$  NMR (101 MHz,  $CDCl_3$ )  $\delta$  148.74, 131.89, 131.02, 130.33, 129.87, 128.23, 127.91, 127.77, 127.52, 126.54, 125.96, 125.71, 125.61, 124.76, 122.22, 121.67, 120.88, 110.68, 66.22, 29.68, 22.64, 22.24; HR-MS (ESI):  $m/z = 285.1268$ , calcd. for  $C_{21}H_{17}O$   $[M+H]^+$ : 285.1274.

**8-methoxy-12,13-dihydro-11H-benzo[*h*]naphtho[1,2-*f*]chromene (7e):** The title compound

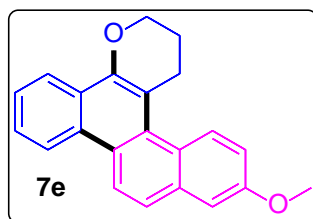

was prepared according to the general procedure B on a 0.25 mmol of **5e** to afford a yellow viscous oil (44 mg, 57% yield);  $^1H$  NMR (400 MHz,  $CDCl_3$ )  $\delta$  8.97 – 8.85 (m, 2H), 8.42 – 8.35 (m, 1H), 7.87 (dd,  $J = 25.2, 8.9$  Hz, 2H), 7.63 – 7.58 (m, 2H), 7.33 (d,  $J = 2.8$  Hz, 1H), 7.28 (dd,  $J = 9.3, 2.8$  Hz, 1H),

4.43 (t,  $J = 5.2$  Hz, 2H), 4.00 (s, 3H), 3.17 (t,  $J = 6.6$  Hz, 2H), 2.33 – 2.24 (m, 2H);  $^{13}C$  NMR (101 MHz,  $CDCl_3$ )  $\delta$  156.71, 148.03, 133.30, 129.64, 129.34, 127.88, 126.82, 126.64, 125.63, 125.57, 125.22, 124.28, 122.61, 121.64, 121.48, 117.11, 110.70, 107.44, 66.18, 55.37, 22.69, 22.24; HR-MS (ESI):  $m/z = 315.1372$ , calcd. for  $C_{22}H_{19}O_2$   $[M+H]^+$ : 315.1380.



**4-(2-hydroxyethyl)-2,2-dimethyl-3-phenylbenzo[*b*]oxepin-5(2*H*)-one (8a):** The title compound

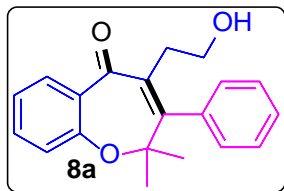

was prepared according to the general procedure B on a 0.25 mmol of **5f** to afford a yellow viscous oil (46 mg, 73% yield);  $^1\text{H}$  NMR (400 MHz,  $\text{CDCl}_3$ )  $\delta$  7.93 (dd,  $J = 8.0, 1.7$  Hz, 1H), 7.47 (ddd,  $J = 8.3, 7.2, 1.8$  Hz, 1H), 7.38 (tt,  $J = 8.0, 1.8$  Hz, 2H), 7.36 – 7.29 (m, 1H), 7.13 – 7.06 (m, 3H), 7.00 (dd,  $J = 8.2, 1.0$  Hz, 1H), 3.49 – 3.41 (m, 2H), 2.74 (s, 1H), 2.33 (t,  $J = 6.2$  Hz, 2H), 1.39 (s, 6H);  $^{13}\text{C}$  NMR (101 MHz,  $\text{CDCl}_3$ )  $\delta$  195.43, 155.95, 155.16, 139.21, 138.70, 135.19, 130.24, 128.55, 128.54, 128.53, 127.75, 127.63, 122.43, 122.26, 81.72, 62.37, 35.29, 28.85; HR-MS (ESI):  $m/z = 309.1487$ , calcd. for  $\text{C}_{20}\text{H}_{21}\text{O}_3$   $[\text{M}+\text{H}]^+$ : 309.1485.

**2,3-dihydrobenzo[*b*]furo[2,3-*d*]oxepin-4(5*H*)-one (11a):** The title compound was prepared

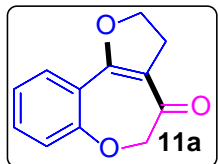

according to the general procedure B on a 0.25 mmol of **9a** to afford a yellow viscous oil (31 mg, 62% yield); M.P. 109 °C ~ 111 °C;  $^1\text{H}$  NMR (400 MHz,

$\text{CDCl}_3$ )  $\delta$  7.72 (dd,  $J = 7.9, 1.7$  Hz, 1H), 7.44 – 7.37 (m, 1H), 7.22 – 7.14 (m, 2H), 4.63 (t,  $J = 9.7$  Hz, 2H), 4.52 (s, 2H), 3.16 (t,  $J = 9.7$  Hz, 2H);  $^{13}\text{C}$  NMR (101 MHz,  $\text{CDCl}_3$ )  $\delta$  192.50, 164.36, 158.49, 132.81, 128.52, 124.28, 121.58, 121.19, 115.68, 70.97, 29.38; HR-MS (ESI):  $m/z = 203.0699$ , calcd. for  $\text{C}_{12}\text{H}_{11}\text{O}_3$   $[\text{M}+\text{H}]^+$ : 203.0703.

**Methyl 4-(2,3-dihydrobenzo[*b*]furo[2,3-*d*]oxepin-4-yl)benzoate (2c'):** The title compound

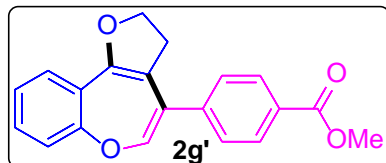

was prepared according to the general procedure B on a 0.25 mmol of **1g** to afford a light yellow viscous oil (38 mg, 48%

yield);  $^1\text{H}$  NMR (400 MHz,  $\text{CDCl}_3$ )  $\delta$  8.03 – 7.91 (m, 2H), 7.49 (dd,  $J = 7.7, 1.7$  Hz, 1H), 7.36 (td,  $J = 7.7, 1.7$  Hz, 1H), 7.33 – 7.28 (m, 2H), 7.18 (td,  $J = 7.5, 0.7$  Hz, 1H), 7.07 – 7.01 (m, 1H), 6.22 (s, 1H), 4.55 (t,  $J = 9.4$  Hz, 2H), 3.90 (s, 3H), 2.82 (t,  $J = 9.4$  Hz, 2H);  $^{13}\text{C}$  NMR (101 MHz, )  $\delta$  166.91, 155.09, 154.84, 140.97, 138.58, 131.66, 129.75, 129.42, 128.53, 125.62, 124.92, 121.05,



109.53, 69.64, 52.22, 32.26; HR-MS (ESI):  $m/z = 321.1120$ , calcd. for  $C_{20}H_{17}O_4$   $[M+H]^+$ : 321.1121.

**5-methyl-4-phenyl-2,3-dihydrobenzo[*b*]furo[2,3-*d*]oxepine (7a')**: The title compound was

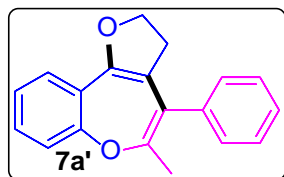

prepared according to the general procedure B on a 0.25 mmol of **5a** to afford a light yellow solid (41 mg, 60% yield); M.P. 81 °C ~ 83 °C;  $^1H$  NMR (400 MHz,  $CDCl_3$ )  $\delta$  7.49 (dd,  $J = 7.7, 1.7$  Hz, 1H), 7.40 – 7.34 (m,

1H), 7.32 (ddd,  $J = 6.6, 4.3, 1.1$  Hz, 2H), 7.26 (dt,  $J = 7.3, 1.7$  Hz, 1H), 7.19 (td,  $J = 7.5, 1.2$  Hz, 1H), 7.16 – 7.12 (m, 2H), 7.04 (dd,  $J = 8.1, 1.0$  Hz, 1H), 4.45 (t,  $J = 9.4$  Hz, 2H), 2.63 (t,  $J = 9.4$  Hz, 2H), 1.95 (s, 3H);  $^{13}C$  NMR (101 MHz,  $CDCl_3$ )  $\delta$  153.18, 152.04, 145.51, 137.92, 130.83, 129.51, 128.17, 127.00, 125.19, 124.85, 124.60, 123.04, 121.23, 112.39, 69.16, 32.99, 18.21; HR-MS (ESI):  $m/z = 277.1222$ , calcd. for  $C_{19}H_{17}O_2$   $[M+H]^+$ : 277.1223.

**5-methyl-4-phenylbenzo[*b*]furo[2,3-*d*]oxepine (7a'')**: The title compound was prepared using

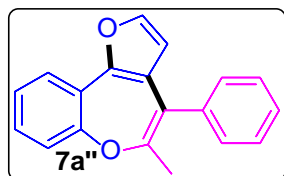

0.1 mmol of **7a'** in 0.11M of 1,2-DCE at 70 °C for about 16 h. After completion, the reaction mixture was diluted using water followed by extraction with dichloromethane. Combined dichloromethane layer was

washed with water, brine, dried over sodium sulfate and evaporated under reduced pressure. The obtained crude products were purified by column chromatography (hexane to 0.25% EA/HEX) to afford the pure compound **7a''** in (7 mg) 40% yield as an off-white sticky mass.  $^1H$  NMR (400 MHz,  $CDCl_3$ )  $\delta$  7.63 (dd,  $J = 7.7, 1.7$  Hz, 1H), 7.38 (d,  $J = 1.9$  Hz, 1H), 7.37 – 7.19 (m, 7H), 7.10 (dd,  $J = 8.0, 1.2$  Hz, 1H), 6.03 (d,  $J = 1.9$  Hz, 1H), 2.06 (s, 3H);  $^{13}C$  NMR (101 MHz,  $CDCl_3$ )  $\delta$  152.84, 149.15, 147.72, 141.74, 138.10, 129.97, 129.83, 128.21, 127.27, 125.10, 125.03, 124.51, 122.85, 121.62, 121.21, 111.61, 109.98, 18.68; HR-MS (ESI):  $m/z = 297.0886$ , calcd. for  $C_{19}H_{14}NaO_2$   $[M+Na]^+$ : 297.0888.



**2-(2-hydroxyethyl)-3-phenylnaphthalene-1,4-dione (12a):** The title compound was prepared

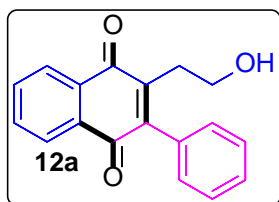

according to the general procedure C on a 0.25 mmol of **1a** to afford a yellow viscous oil (46 mg, 82% yield);  $^1\text{H}$  NMR (400 MHz,  $\text{CDCl}_3$ )  $\delta$

8.12 (dddd,  $J = 6.8, 5.0, 3.3, 0.5$  Hz, 2H), 7.84 – 7.65 (m, 2H), 7.52 – 7.39

(m, 3H), 7.25 – 7.19 (m, 2H), 3.73 (t,  $J = 6.4$  Hz, 2H), 2.78 (t,  $J = 6.4$  Hz, 2H), 2.33 (t,  $J = 6.8$  Hz,

1H);  $^{13}\text{C}$  NMR (101 MHz,  $\text{CDCl}_3$ )  $\delta$  186.29, 184.28, 148.03, 144.55, 133.89, 133.63, 133.23,

131.97, 131.94, 128.96, 128.54, 128.21, 126.58, 126.33, 61.83, 31.65; HR-MS (ESI):  $m/z =$

301.08352, calcd. for  $\text{C}_{18}\text{H}_{14}\text{NaO}_3$   $[\text{M}+\text{Na}]^+$ : 301.08350.

**3-(2-hydroxyethyl)-[2,2'-binaphthalene]-1,4-dione (12b):** The title compound was prepared

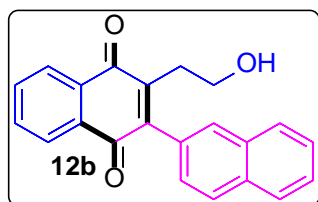

according to the general procedure C on a 0.25 mmol of **1i** to afford a yellow viscous oil (35 mg, 72% yield);  $^1\text{H}$  NMR (400 MHz,  $\text{CDCl}_3$ )  $\delta$

8.20 – 8.06 (m, 2H), 7.96 – 7.80 (m, 3H), 7.80 – 7.68 (m, 3H), 7.56 –

7.48 (m, 2H), 7.31 (dd,  $J = 8.5, 2.3$  Hz, 2H), 3.71 (t,  $J = 6.4$  Hz, 2H), 2.81 (t,  $J = 6.7$  Hz, 2H);  $^{13}\text{C}$

NMR (101 MHz,  $\text{CDCl}_3$ )  $\delta$  186.45, 184.51, 148.23, 145.05, 134.05, 133.81, 128.34, 127.99,

127.88, 126.84, 126.81, 126.76, 126.60, 126.54, 62.01, 31.84; HR-MS (ESI):  $m/z = 329.1179$ ,

calcd. for  $\text{C}_{22}\text{H}_{17}\text{O}_3$   $[\text{M}+\text{H}]^+$ : 329.1172.

**2-(2-hydroxyethyl)-3-(thiophen-2-yl)naphthalene-1,4-dione (12c):** The title compound was

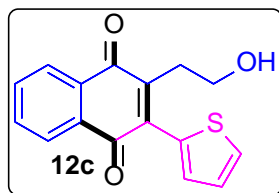

prepared according to the general procedure C on a 0.25 mmol of **1j** to afford a yellow viscous oil (44 mg, 63% yield);  $^1\text{H}$  NMR (400 MHz,

$\text{CDCl}_3$ ) 8.15 – 8.04 (m, 2H), 7.79 – 7.71 (m, 2H), 7.59 (dd,  $J = 5.1, 1.2$

Hz, 1H), 7.28 – 7.24 (m, 1H), 7.16 (dd,  $J = 5.1, 3.6$  Hz, 1H), 3.89 (t,  $J = 6.4$  Hz, 2H), 3.01 (t,  $J =$

6.4 Hz, 2H), 2.15 (s, 1H);  $^{13}\text{C}$  NMR (101 MHz,  $\text{CDCl}_3$ )  $\delta$  185.78, 183.64, 145.24, 141.28, 133.95,



133.79, 132.58, 131.93, 131.86, 130.42, 129.24, 126.86, 126.80, 126.39, 62.26, 32.14; HR-MS (ESI):  $m/z = 307.0399$ , calcd. for  $C_{16}H_{12}NaO_3S$   $[M+Na]^+$ : 307.0422.

**2-(3-hydroxypropyl)-3-phenylnaphthalene-1,4-dione (12d):** The title compound was prepared

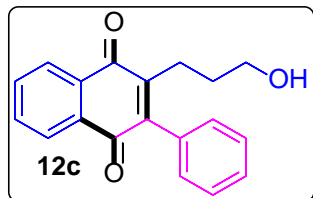

according to the general procedure C on a 0.25 mmol of **3a** to afford a yellow viscous oil (33 mg, 76% yield);  $^1H$  NMR (400 MHz,  $CDCl_3$ )  $\delta$  8.15 – 8.06 (m, 2H), 7.76 – 7.71 (m, 2H), 7.48 – 7.40 (m, 3H), 7.22 –

7.17 (m, 2H), 3.51 (t,  $J = 6.2$  Hz, 2H), 2.60 – 2.53 (m, 2H), 1.74 (s, 1H), 1.67 (ddd,  $J = 13.4, 8.7, 6.3$  Hz, 2H);  $^{13}C$  NMR (101 MHz, )  $\delta$  185.94, 184.50, 147.61, 147.10, 133.94, 133.74, 133.53, 132.26, 132.15, 128.90, 128.65, 128.38, 126.69, 126.48, 62.05, 32.50, 24.20; HR-MS (ESI):  $m/z = 293.1173$ , calcd. for  $C_{19}H_{17}O_3$   $[M+H]^+$ : 293.1172.

**2-(3-hydroxypropyl)-3-(*p*-tolyl)naphthalene-1,4-dione (12e):** The title compound was prepared

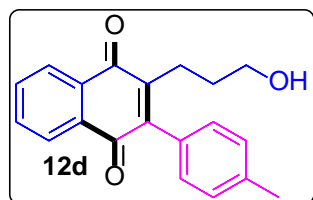

using according to the general procedure C on a 0.25 mmol of **3b** to afford a yellow viscous oil (33 mg, 73% yield);  $^1H$  NMR (400 MHz,  $CDCl_3$ )  $\delta$  8.10 (ddd,  $J = 8.7, 6.6, 4.0$  Hz, 2H), 7.73 (dd,  $J = 5.3, 3.4$  Hz,

2H), 7.17 (dd,  $J = 68.0, 7.8$  Hz, 4H), 3.51 (t,  $J = 6.1$  Hz, 2H), 2.58 (t,  $J = 7.4$  Hz, 2H), 2.40 (s, 3H), 1.84 – 1.53 (m, 3H);  $^{13}C$  NMR (101 MHz,  $CDCl_3$ )  $\delta$  186.01, 184.60, 147.46, 147.21, 138.57, 133.88, 133.68, 132.28, 132.19, 130.51, 129.11, 128.84, 126.69, 126.44, 62.05, 32.53, 24.18, 21.44; HR-MS (ESI):  $m/z = 307.1335$ , calcd. for  $C_{20}H_{19}O_3$   $[M+H]^+$ : 307.1329.

**6-bromo-3-(3-hydroxypropyl)-2-phenylnaphthalene-1,4-dione (12f):** The title compound was

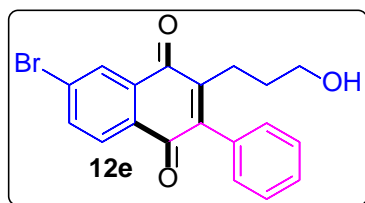

prepared according to the general procedure C on a 0.25 mmol of **3q** to afford a yellow viscous oil (39 mg, 71% yield);  $^1H$  NMR (400 MHz,  $CDCl_3$ )  $\delta$  8.26 (d,  $J = 2.0$  Hz, 1H), 7.96 (d,  $J = 8.3$  Hz, 1H),

7.86 (dd,  $J = 8.3, 2.0$  Hz, 1H), 7.49 – 7.41 (m, 3H), 7.21 – 7.16 (m, 2H), 3.51 (t,  $J = 6.2$  Hz, 2H),



2.60 – 2.52 (m, 2H), 1.67 (dt,  $J = 13.5, 6.3$  Hz, 3H);  $^{13}\text{C}$  NMR (101 MHz,  $\text{CDCl}_3$ )  $\delta$  184.78, 183.75, 147.62, 147.20, 136.92, 133.29, 133.20, 130.70, 129.50, 129.24, 128.86, 128.82, 128.49, 128.43, 62.09, 32.43, 24.35; HR-MS (ESI):  $m/z = 371.0284$ , calcd. for  $\text{C}_{19}\text{H}_{16}\text{O}_3\text{Br}$   $[\text{M}+\text{H}]^+$ : 371.0277.



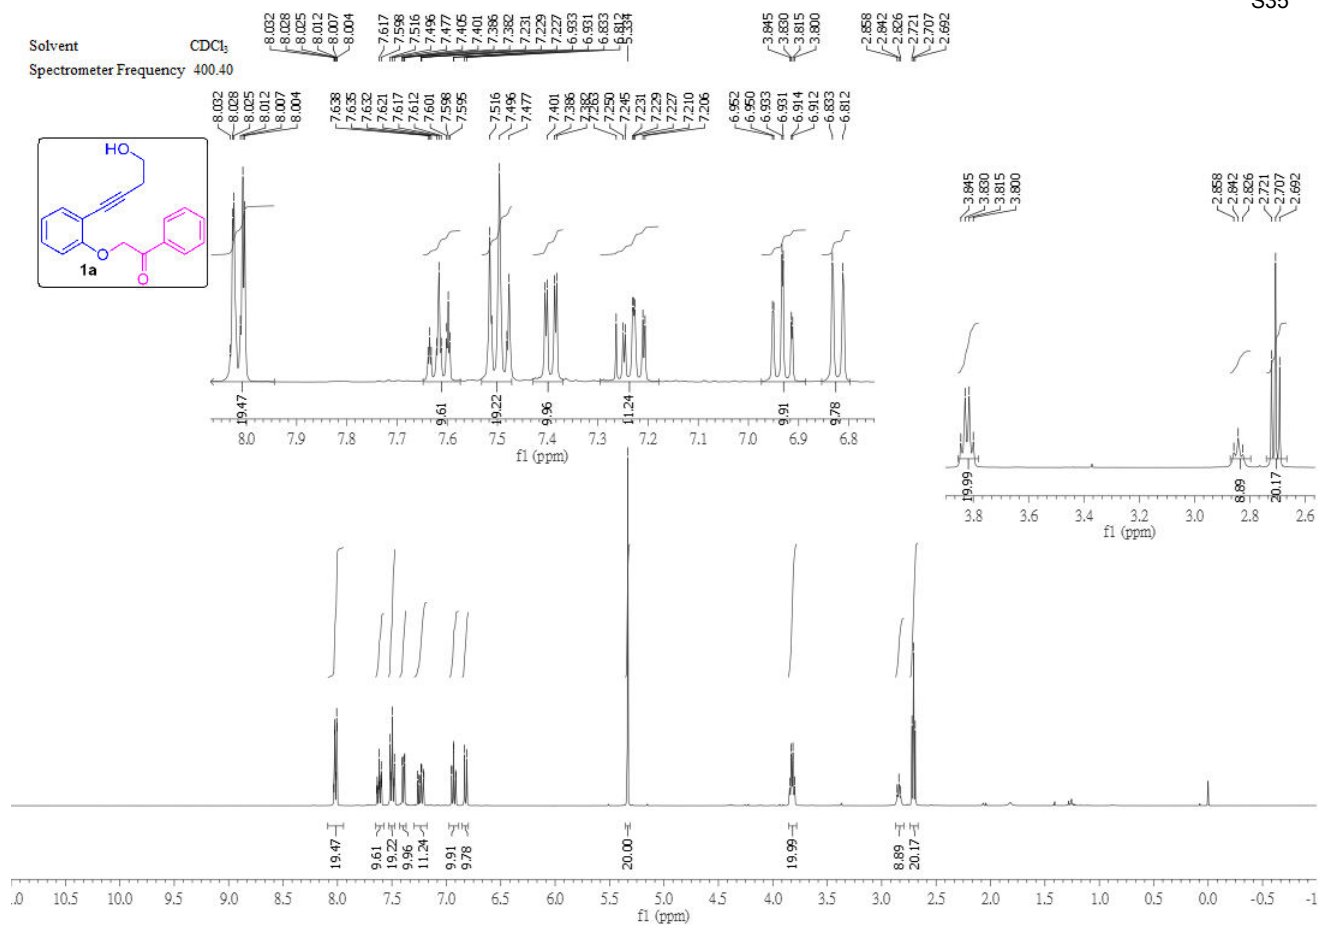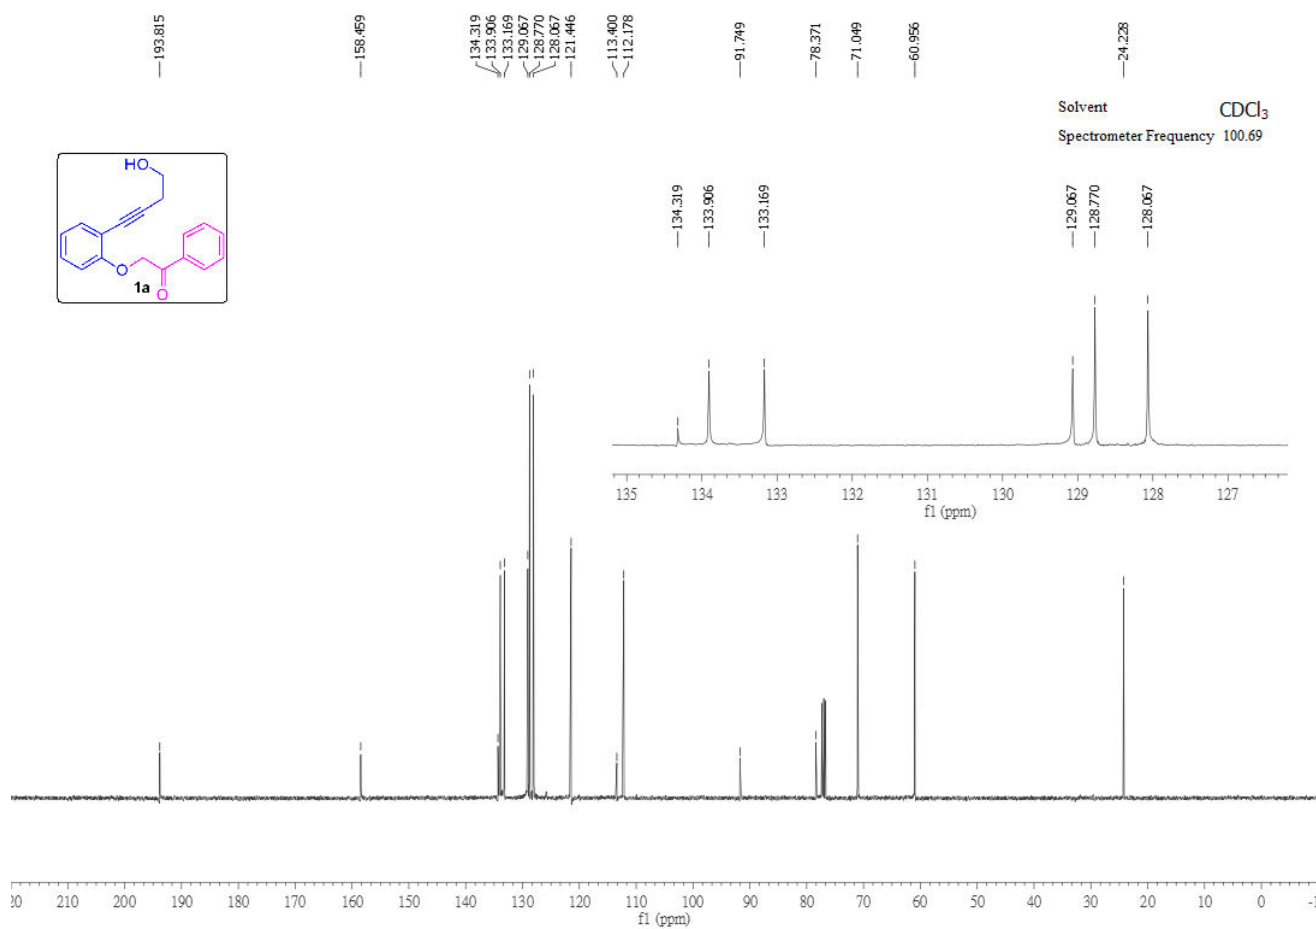



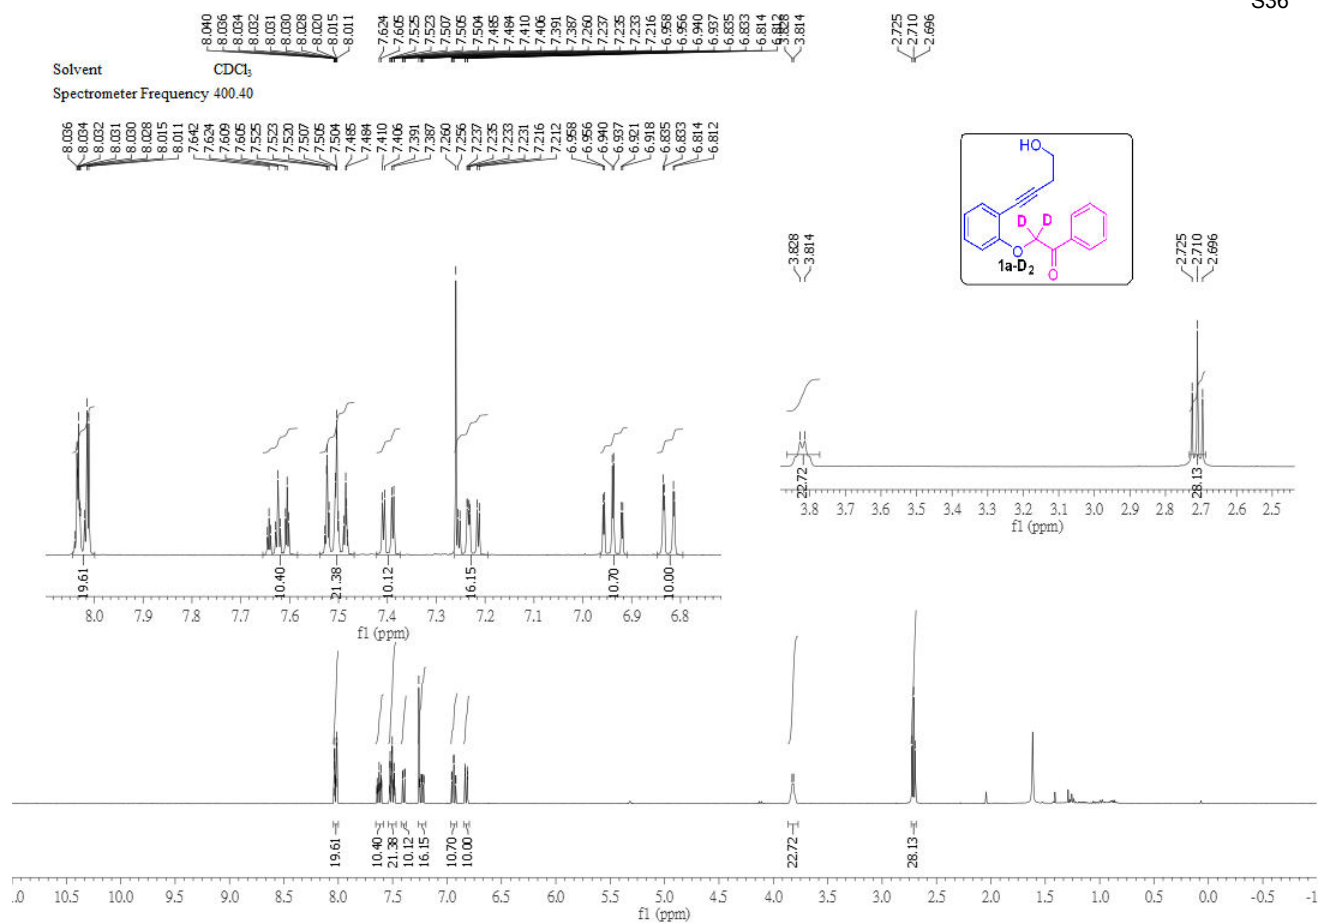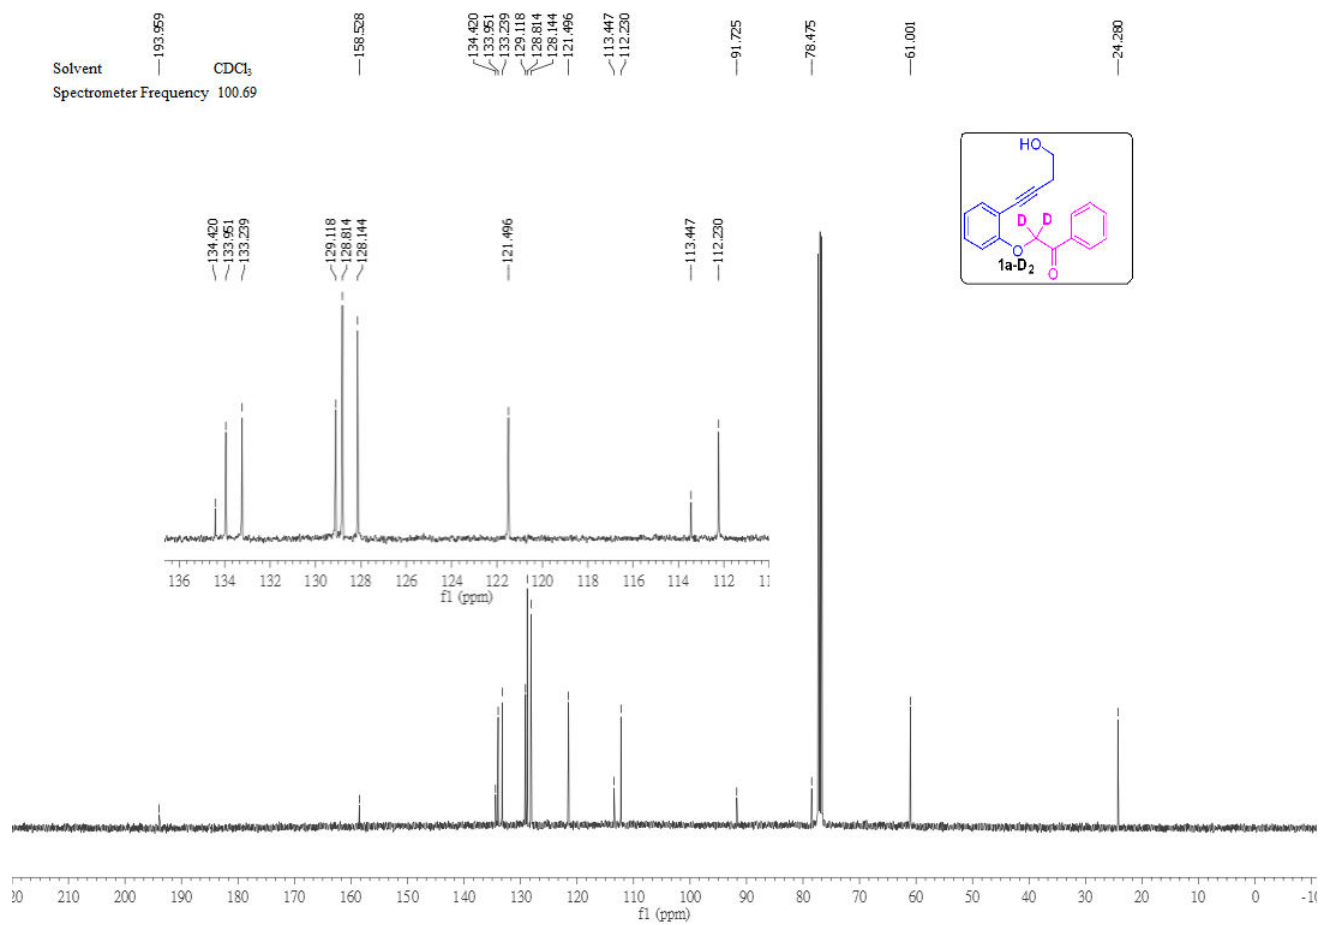



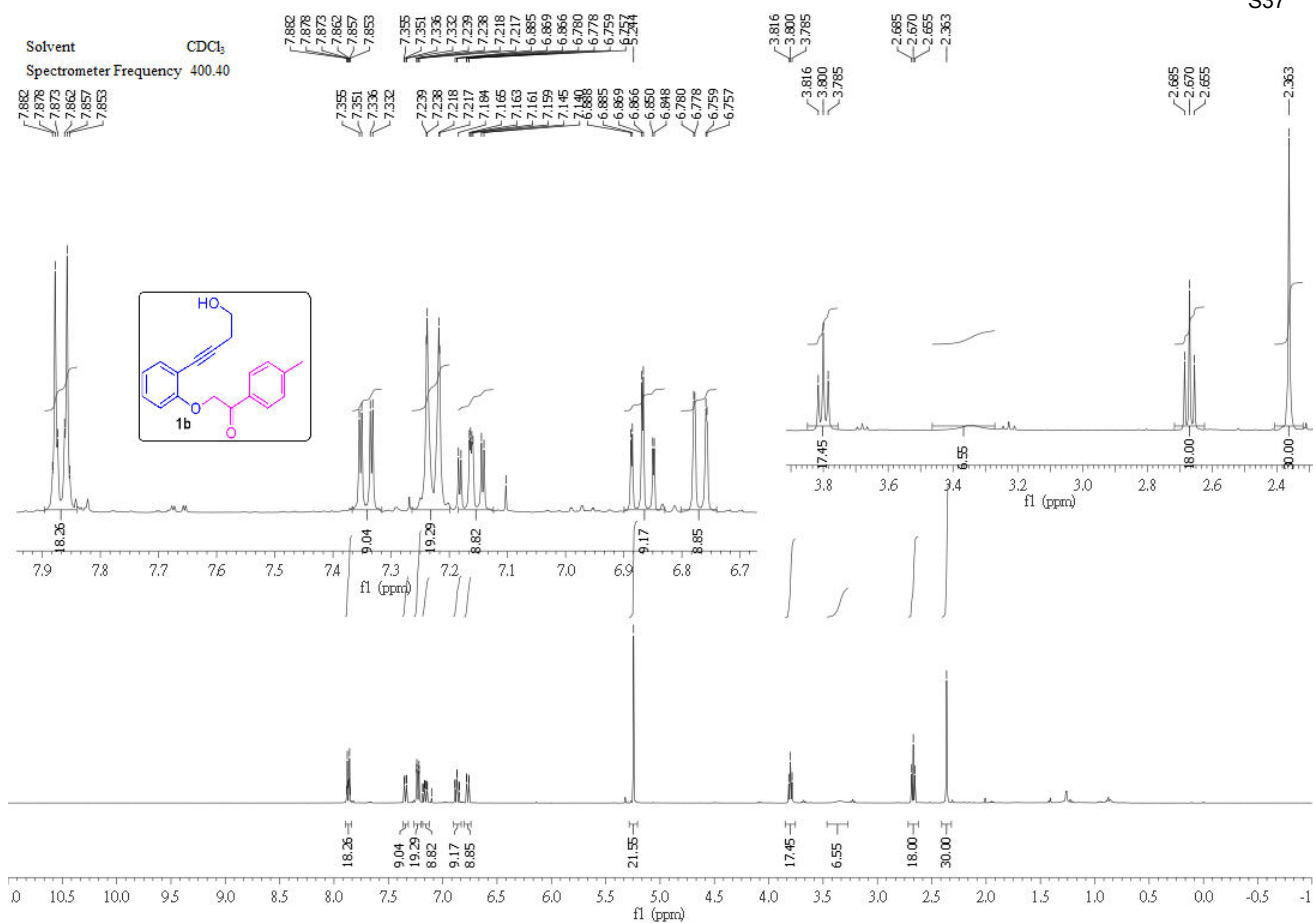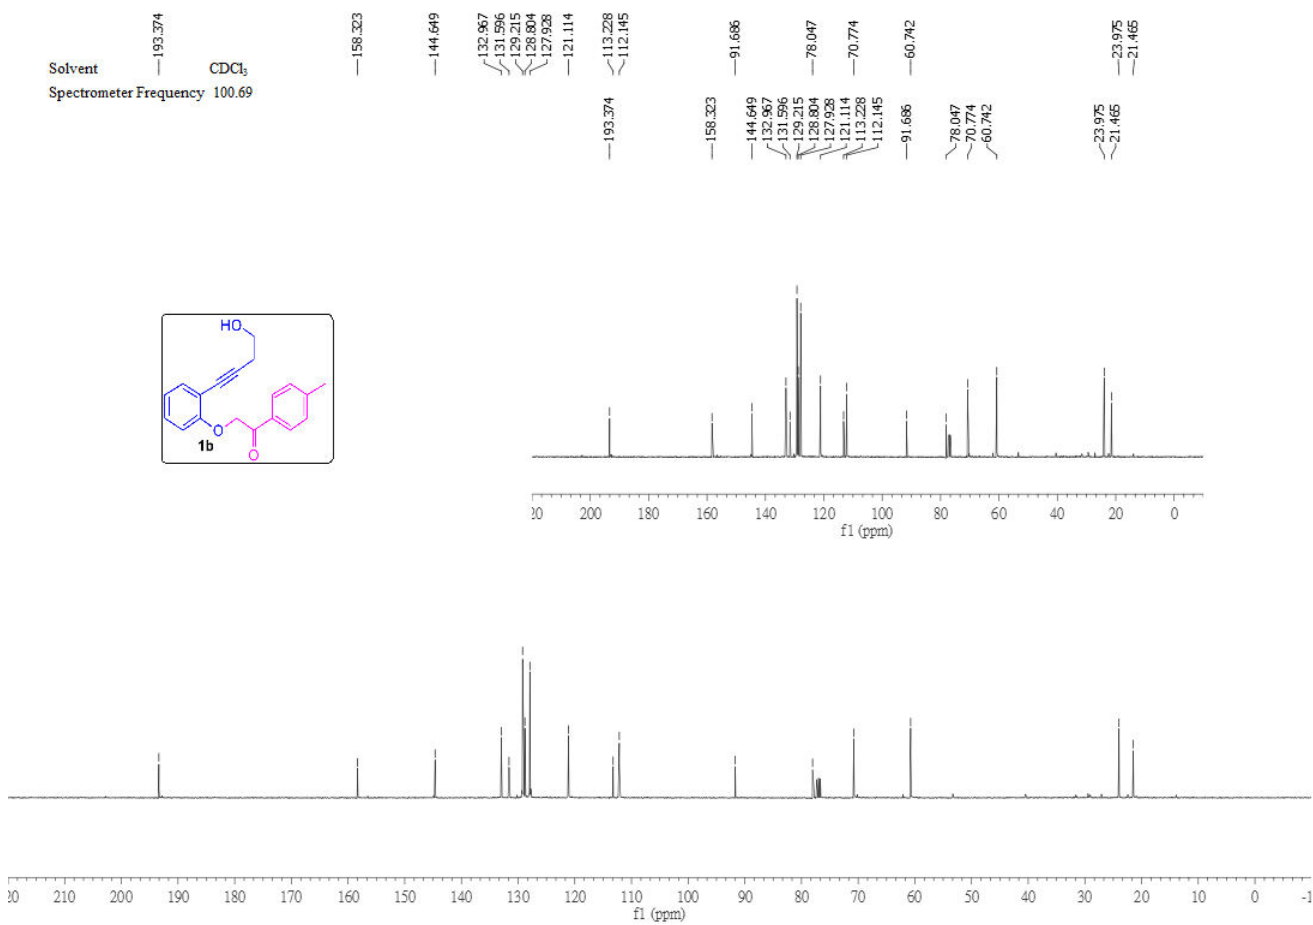



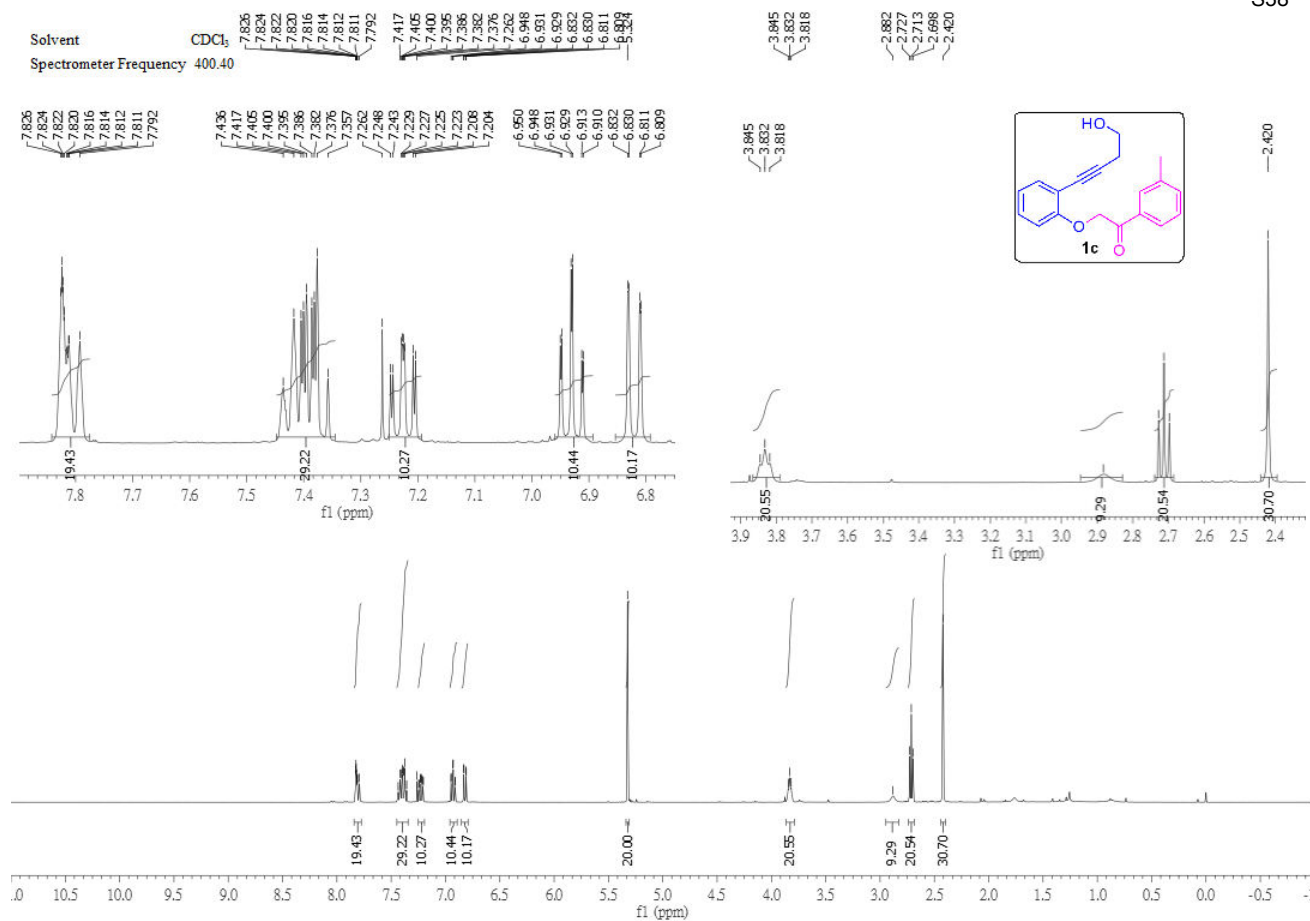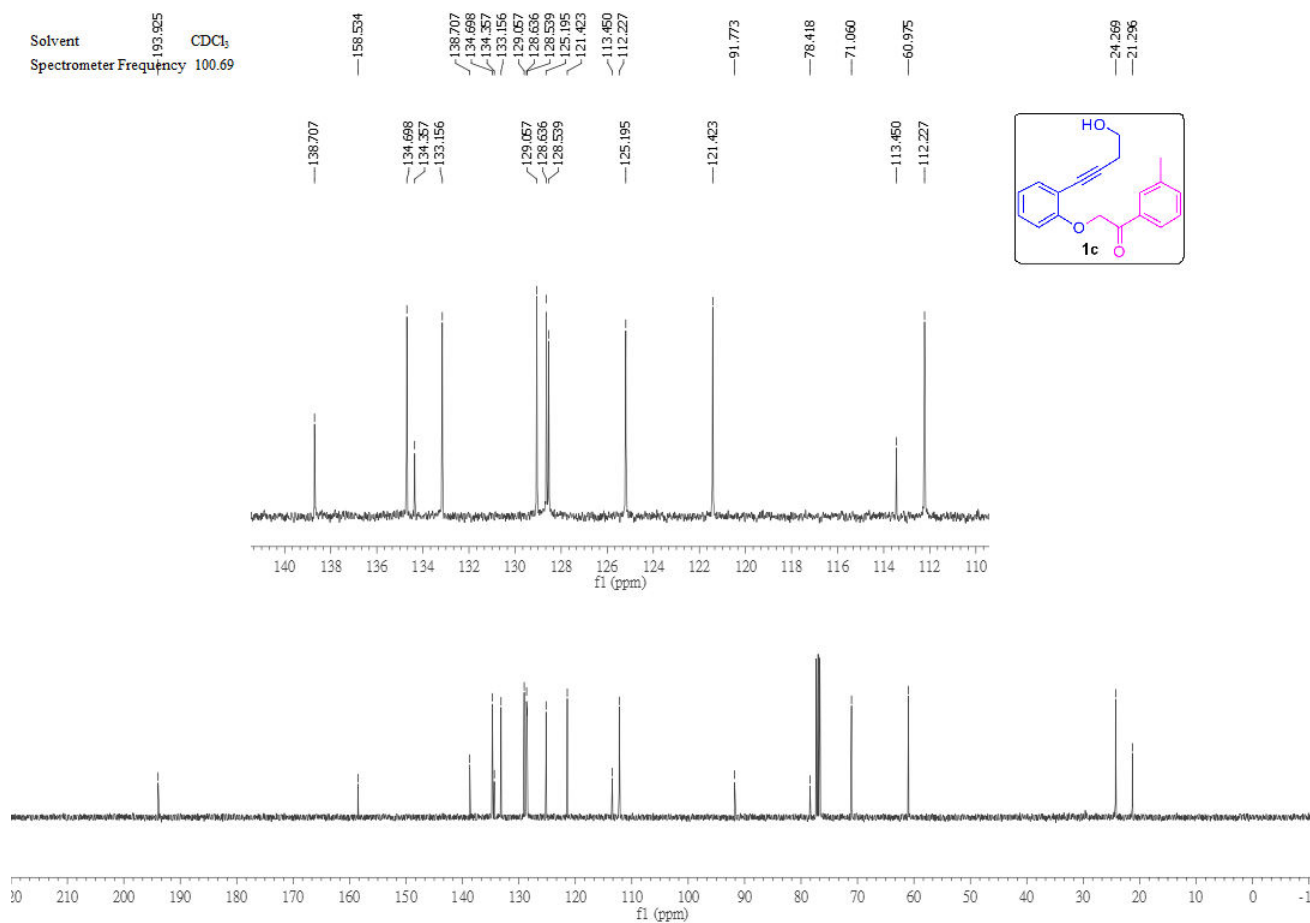



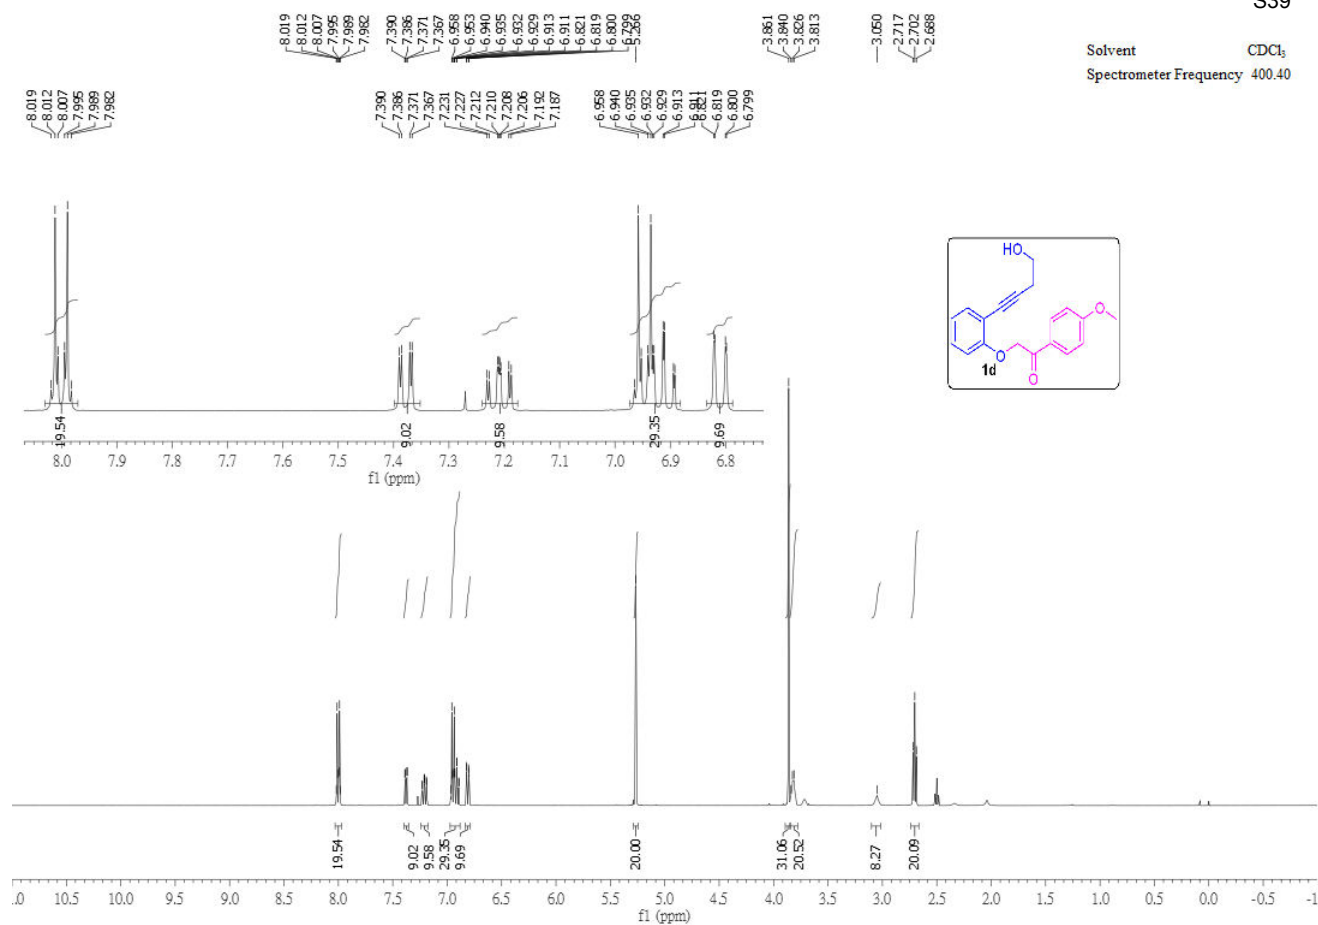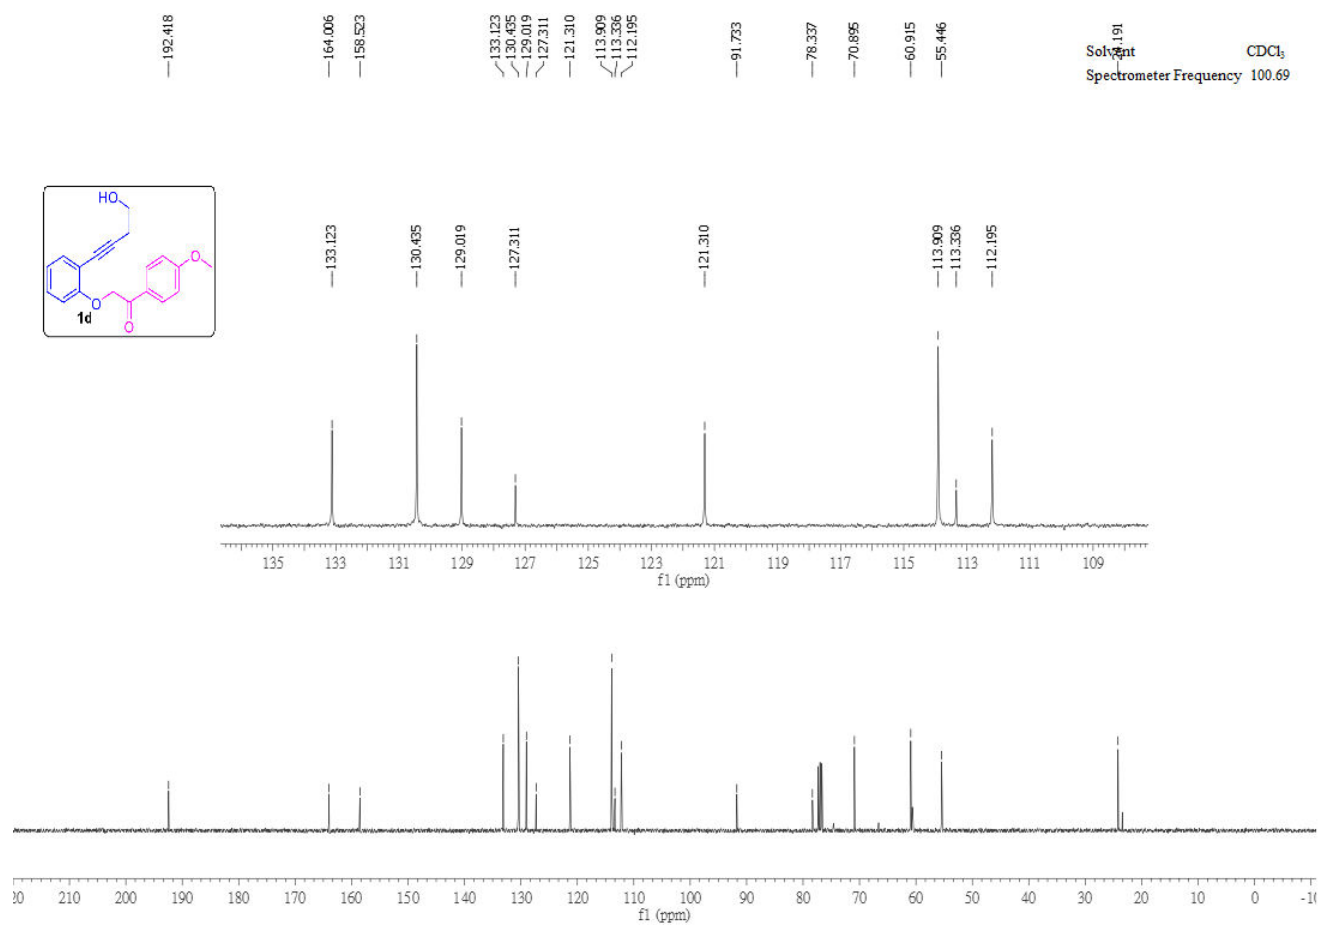



S40

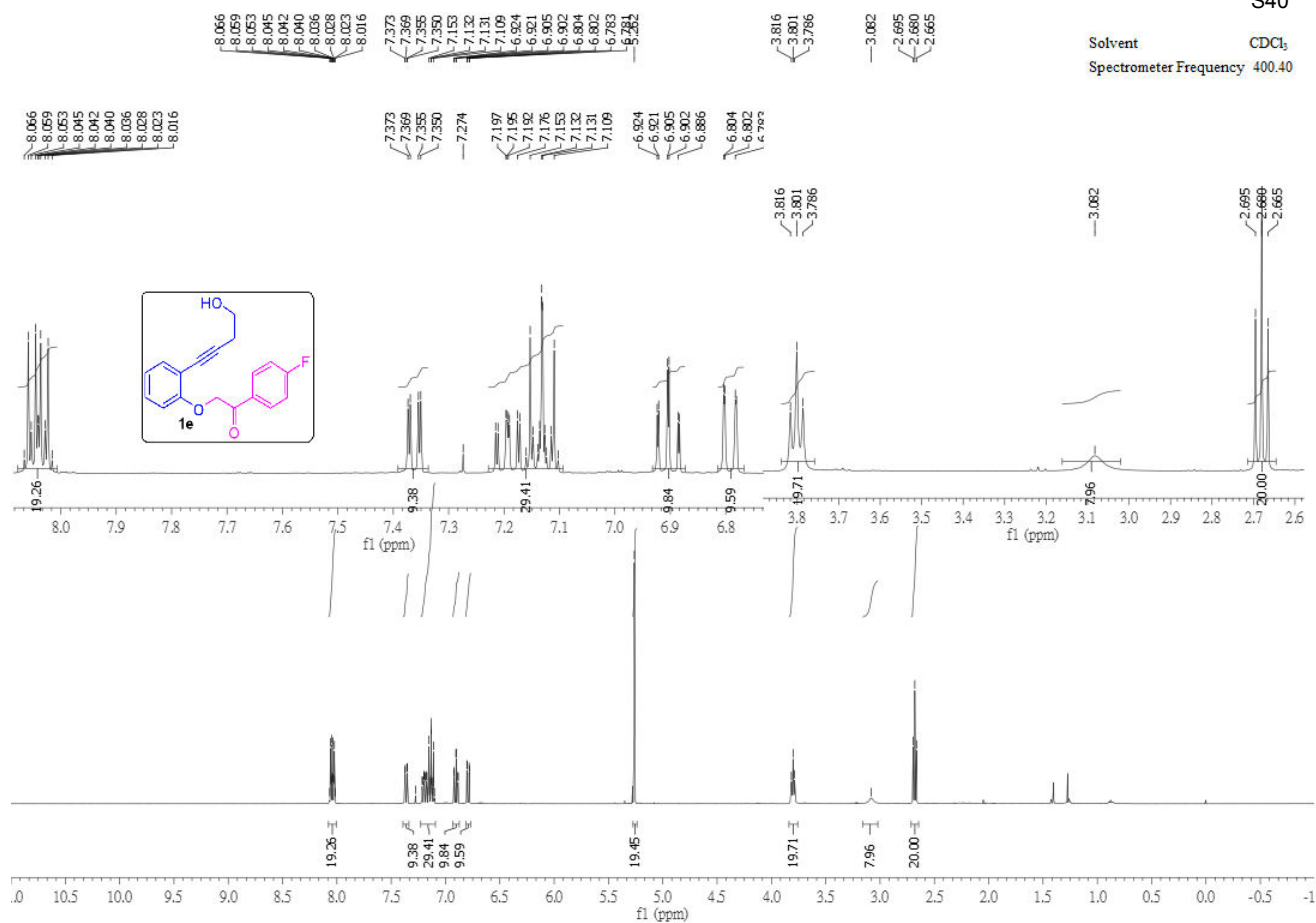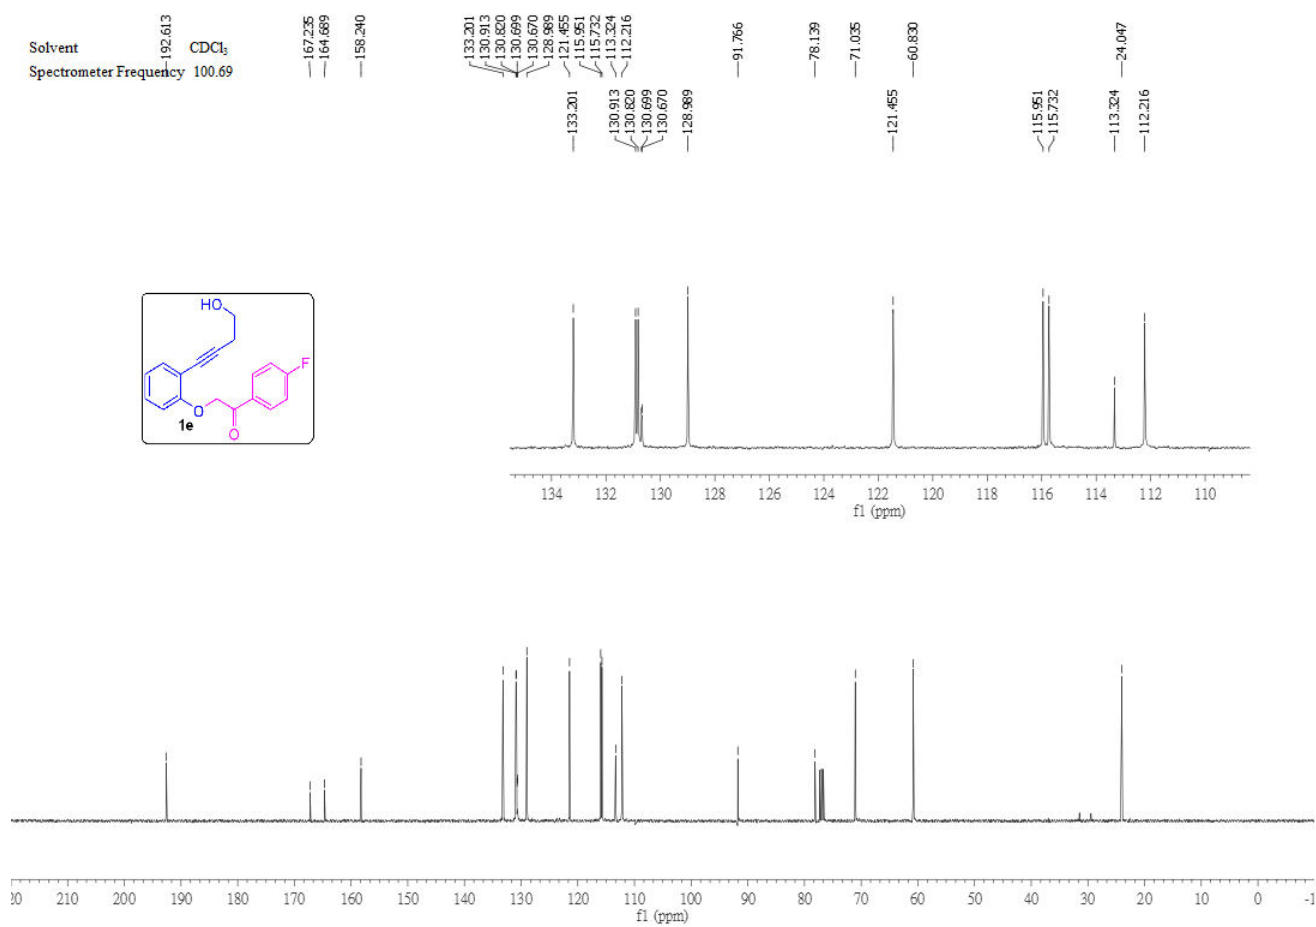



SOC/RP8/sm-3

Pulse Sequence: s2pul

Mercury-4000B "MercuryPlus400"

Date: Apr 28 2016

Solvent: CDCl<sub>3</sub>

Ambient temperature

Total 64 repetitions

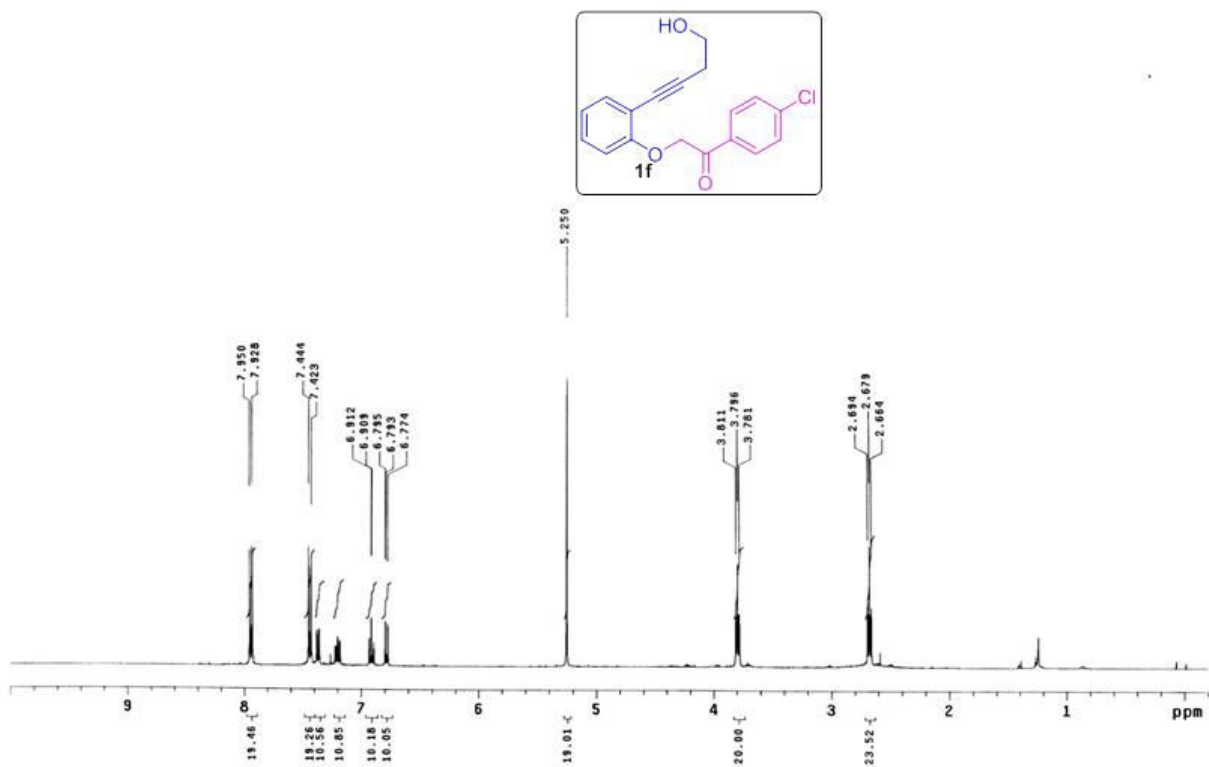

SOC/RP8/sm-3

Pulse Sequence: s2pul

Mercury-4000B "MercuryPlus400"

Date: Apr 28 2016

Solvent: CDCl<sub>3</sub>

Ambient temperature

Total 64000 repetitions

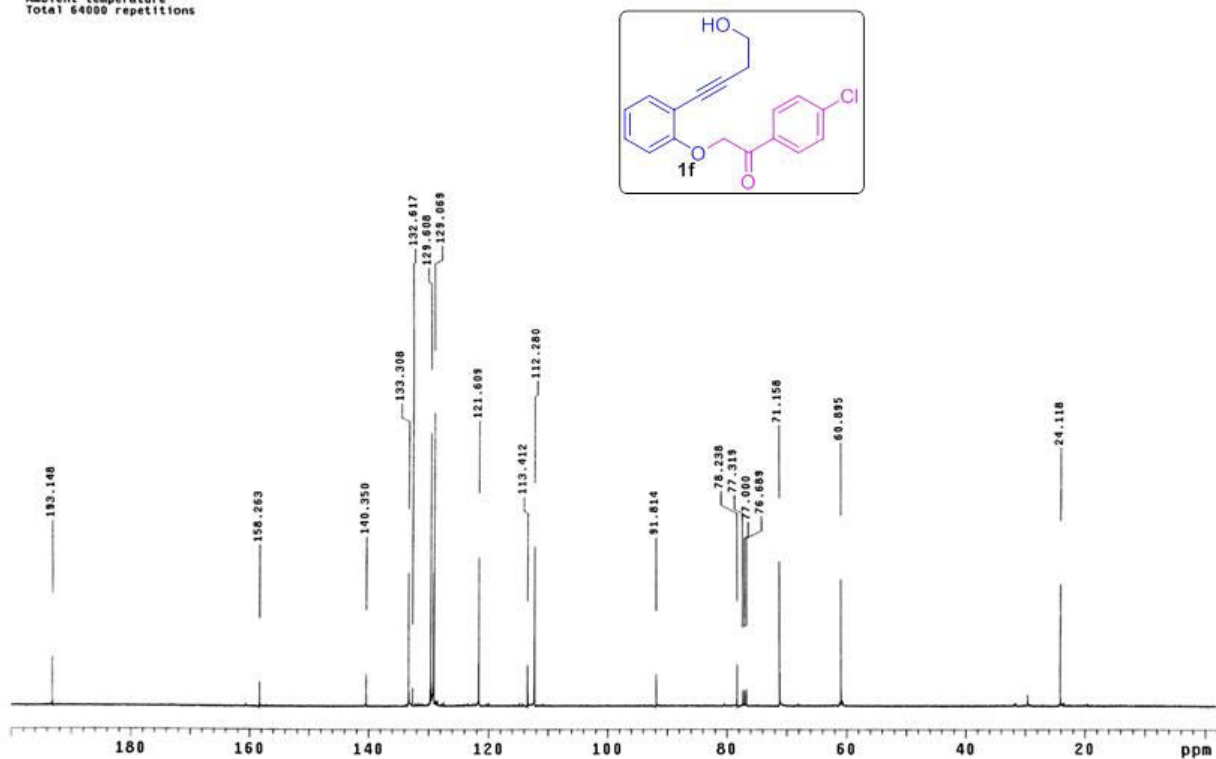



SQC/RP8/sm-5

Pulse Sequence: s2pul  
 Mercury-400BB "MercuryPlus400"  
 Date: May 12 2016  
 Solvent: CDCl<sub>3</sub>  
 Ambient temperature  
 Total 32 repetitions

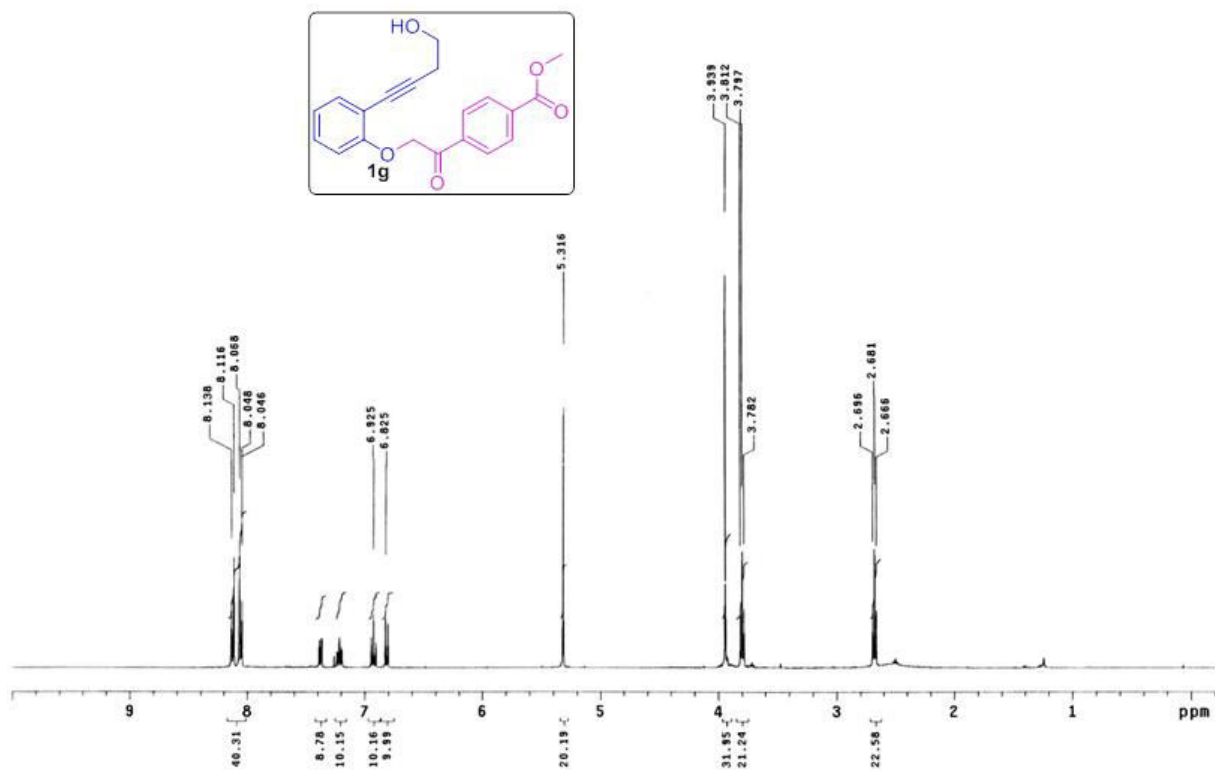

SQC/RP8/sm-5

Pulse Sequence: s2pul  
 Mercury-400BB "MercuryPlus400"  
 Date: May 12 2016  
 Solvent: CDCl<sub>3</sub>  
 Ambient temperature  
 Total 1680 repetitions

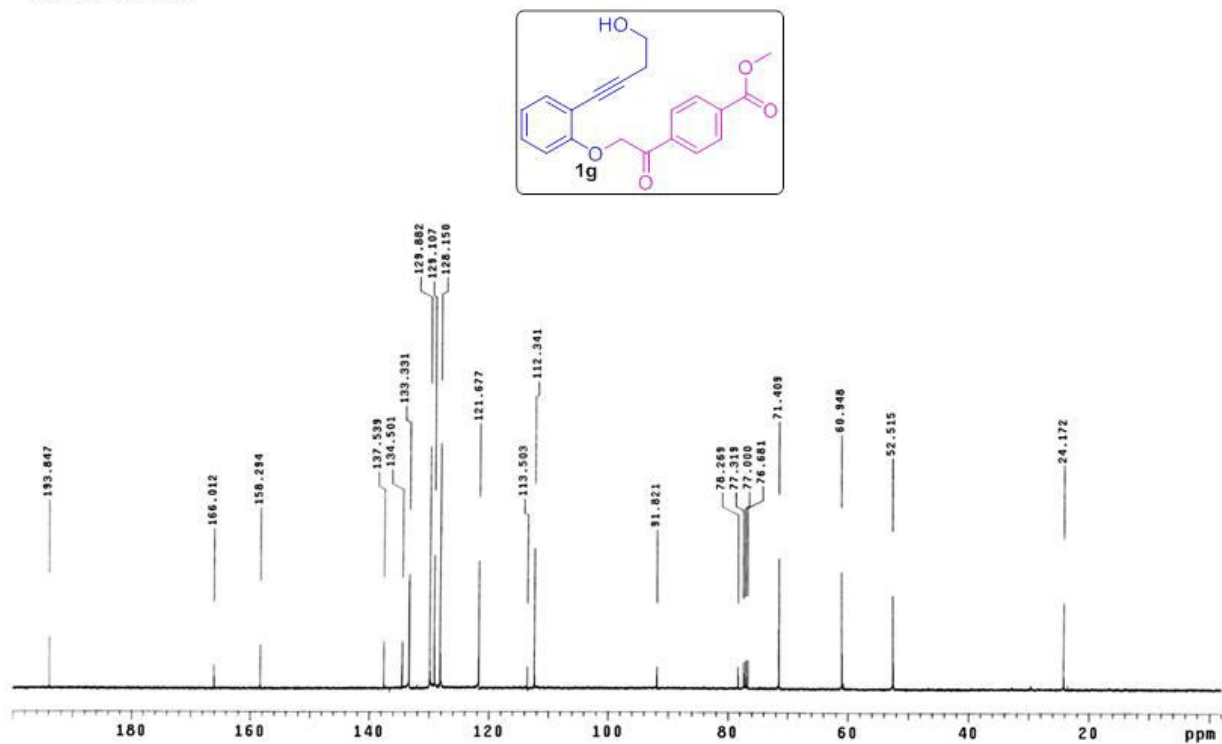



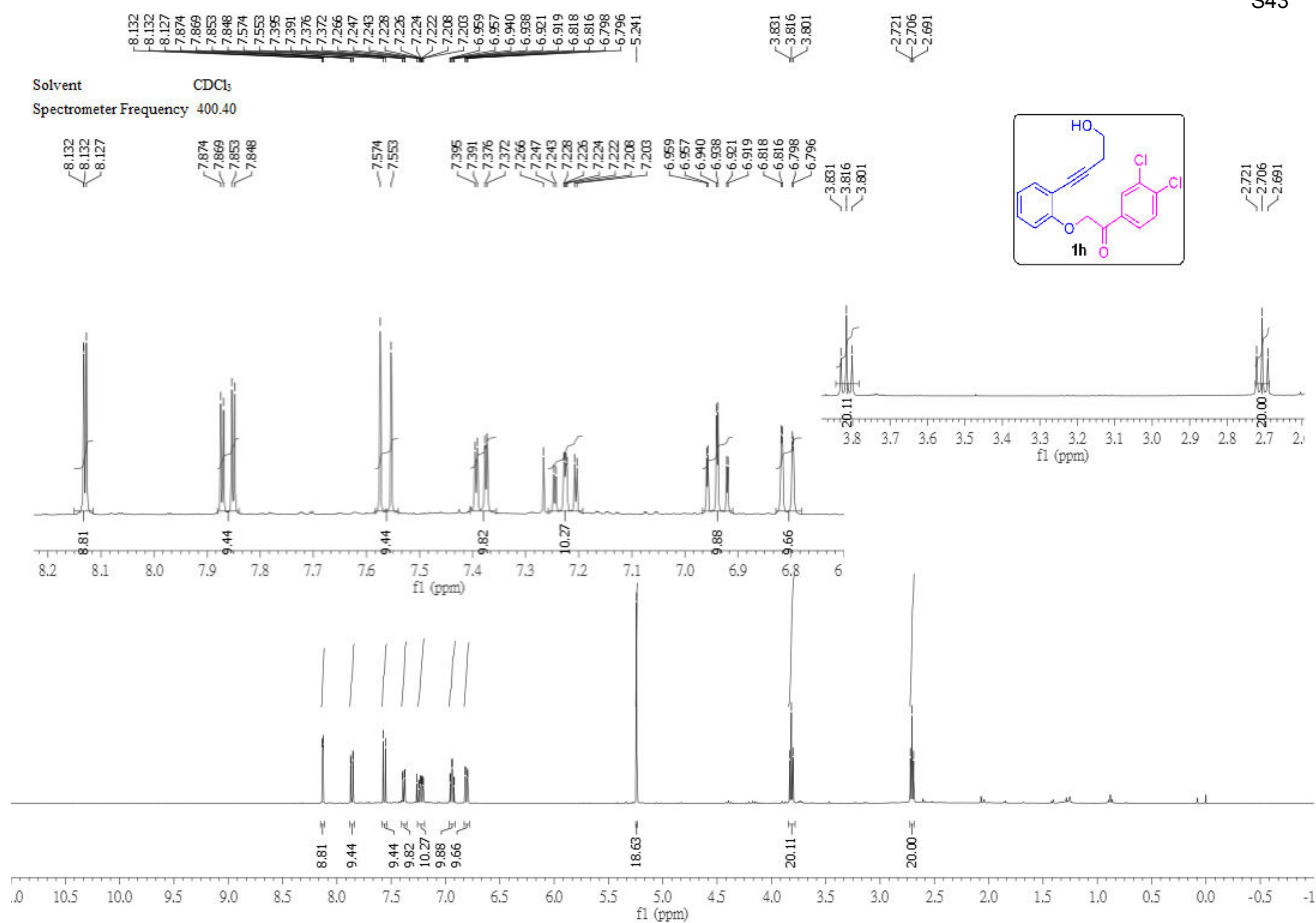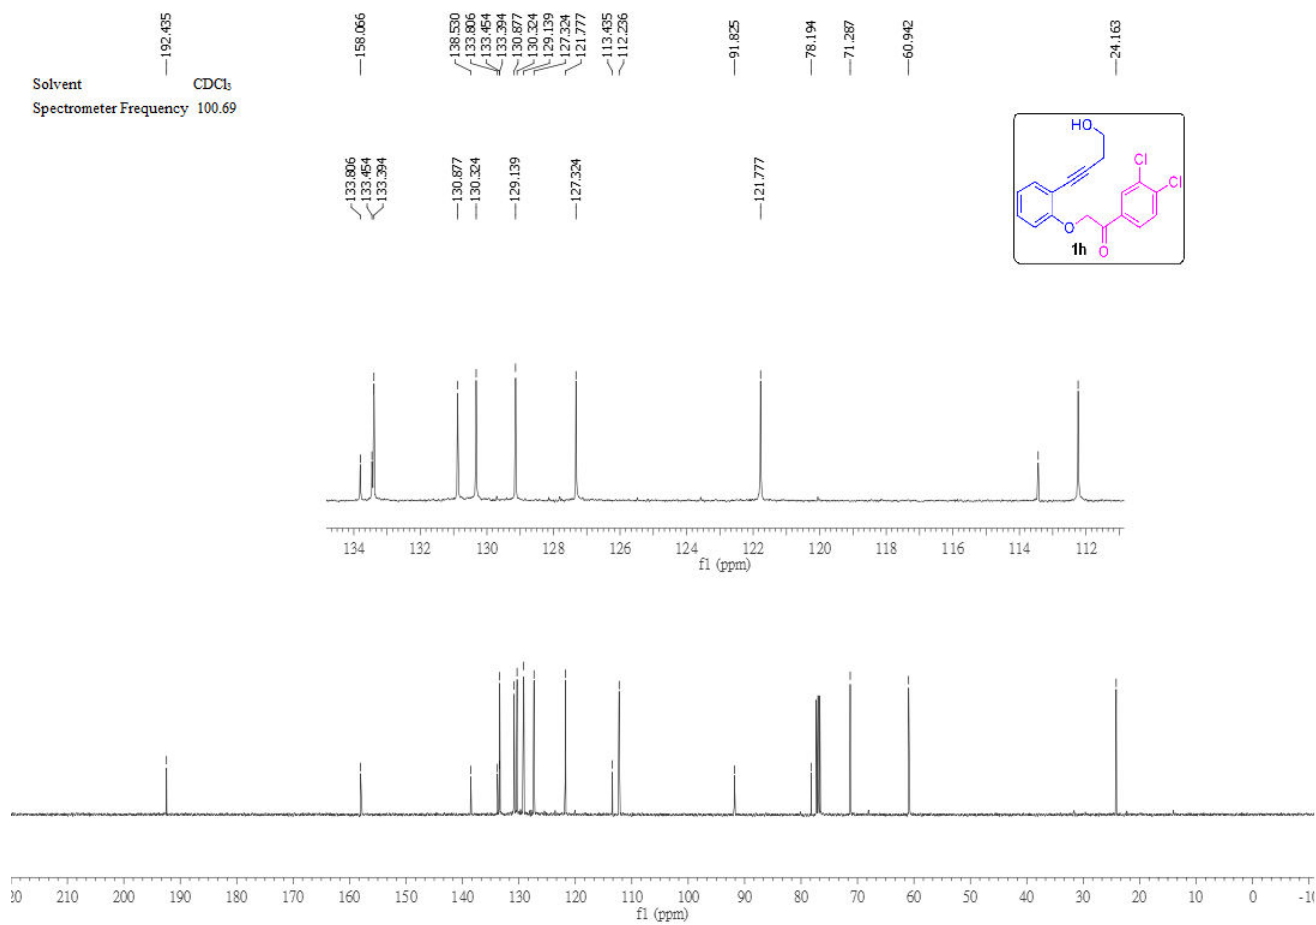



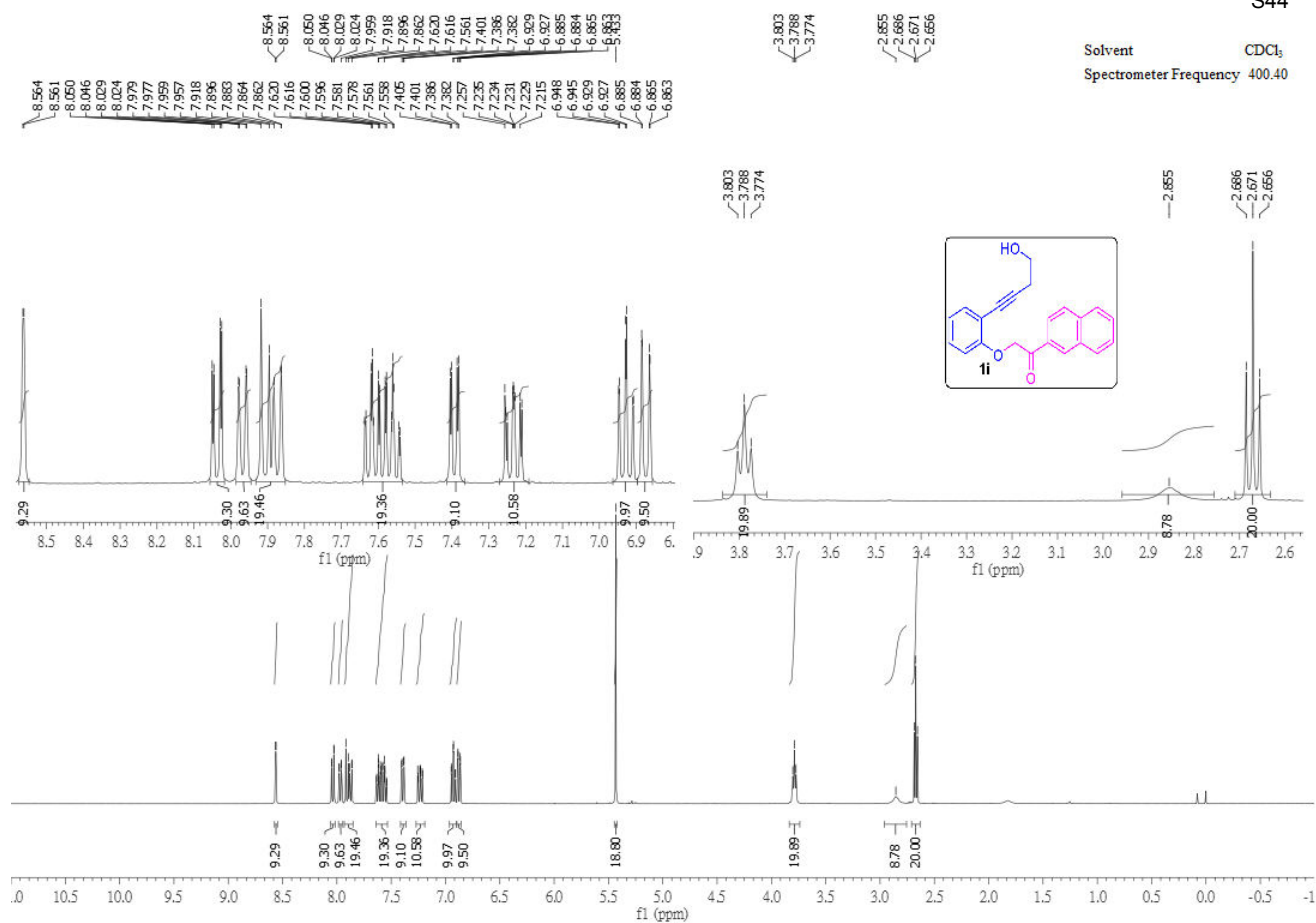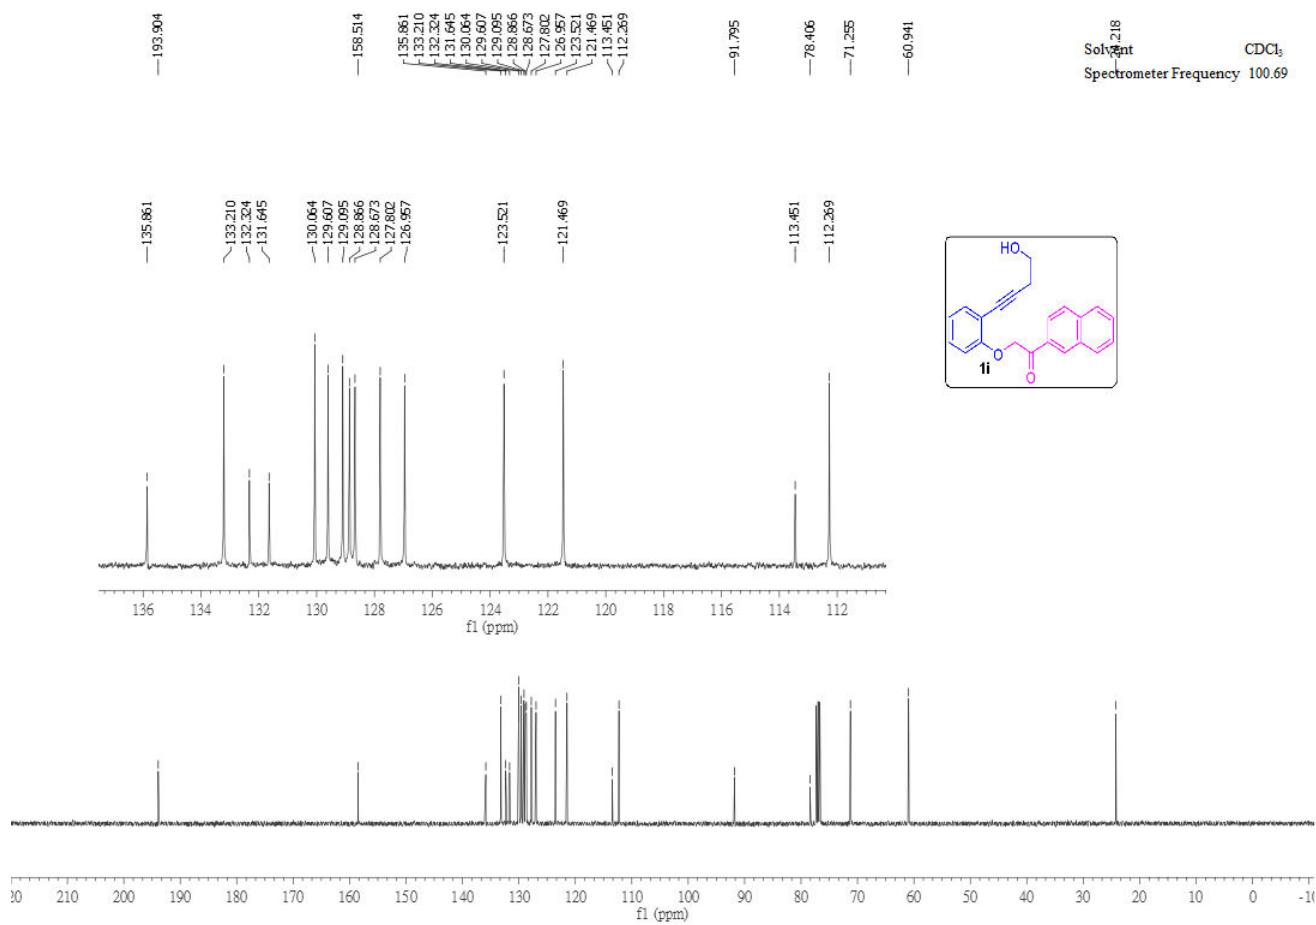



|                        |                   |
|------------------------|-------------------|
| Solvent                | CDCl <sub>3</sub> |
| Spectrometer Frequency | 400.40            |

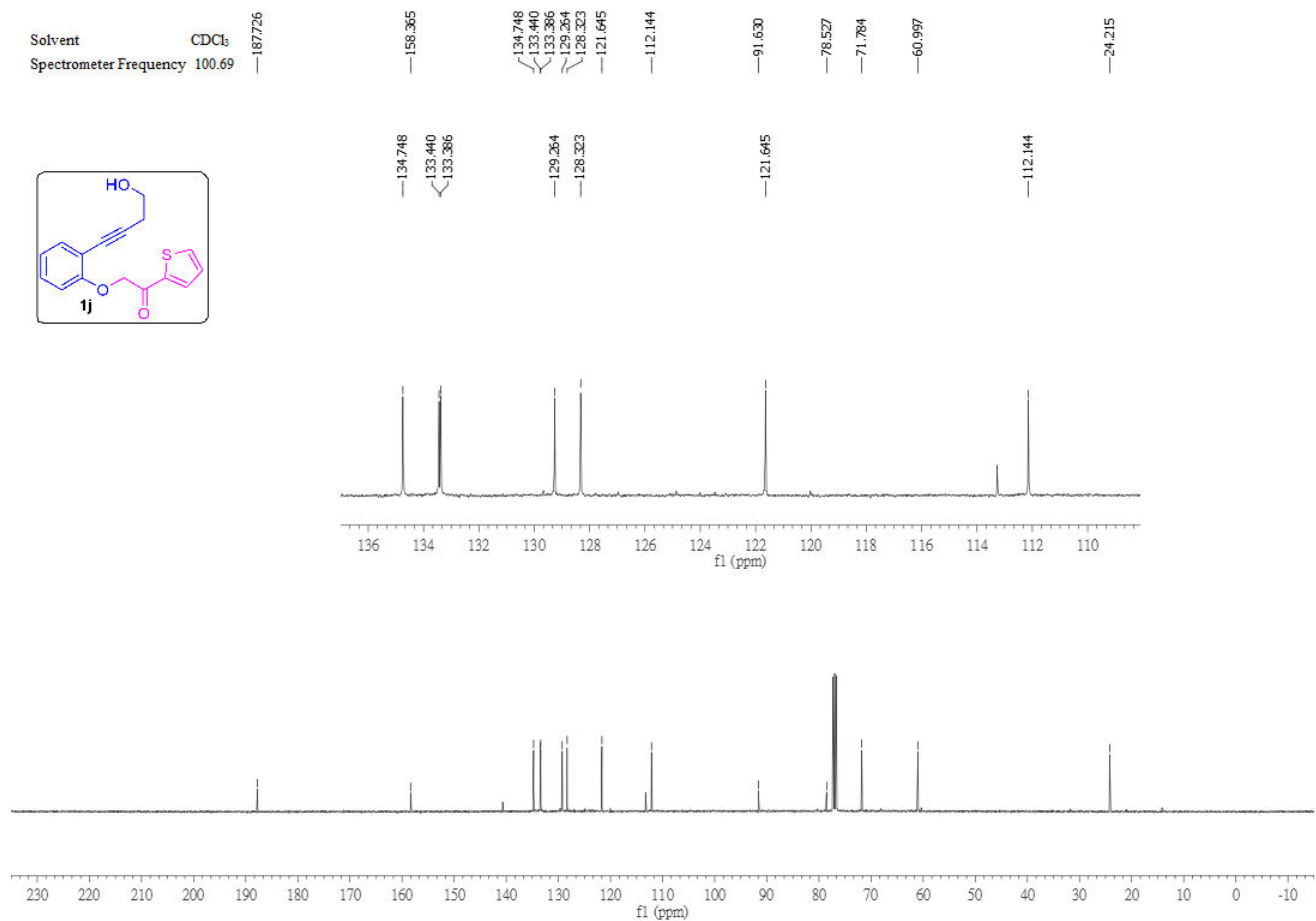



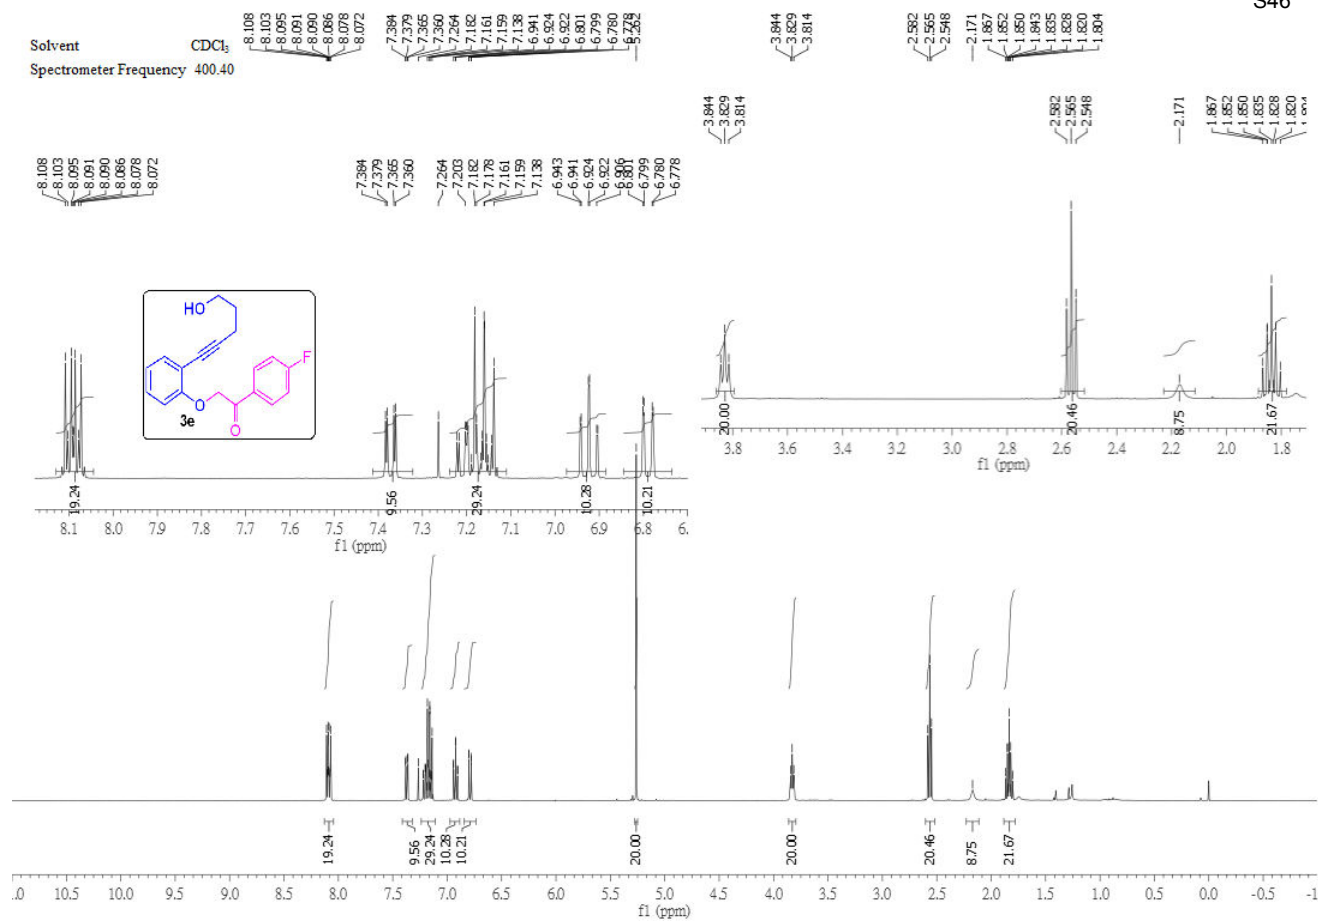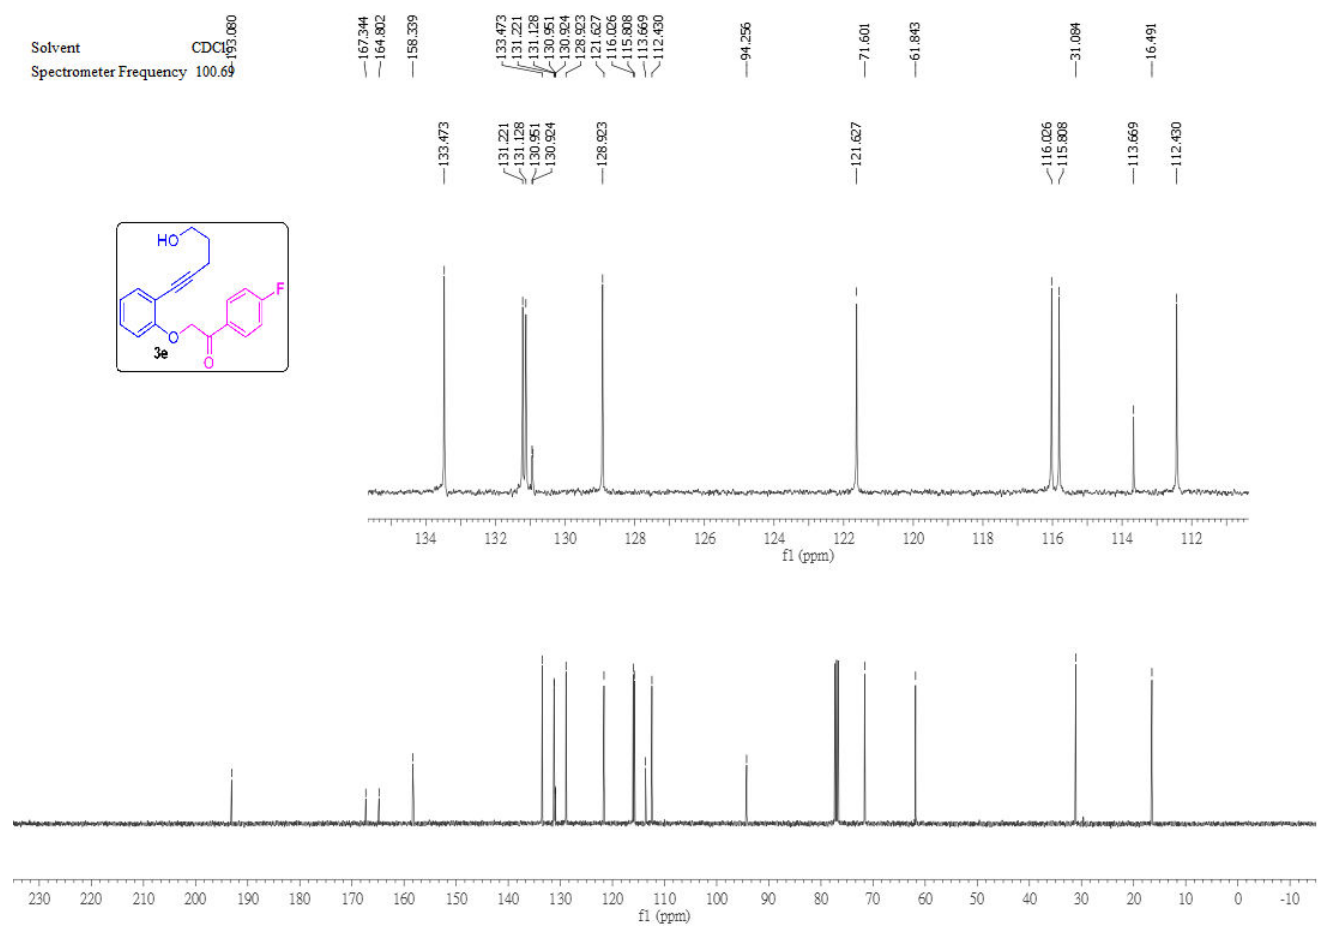



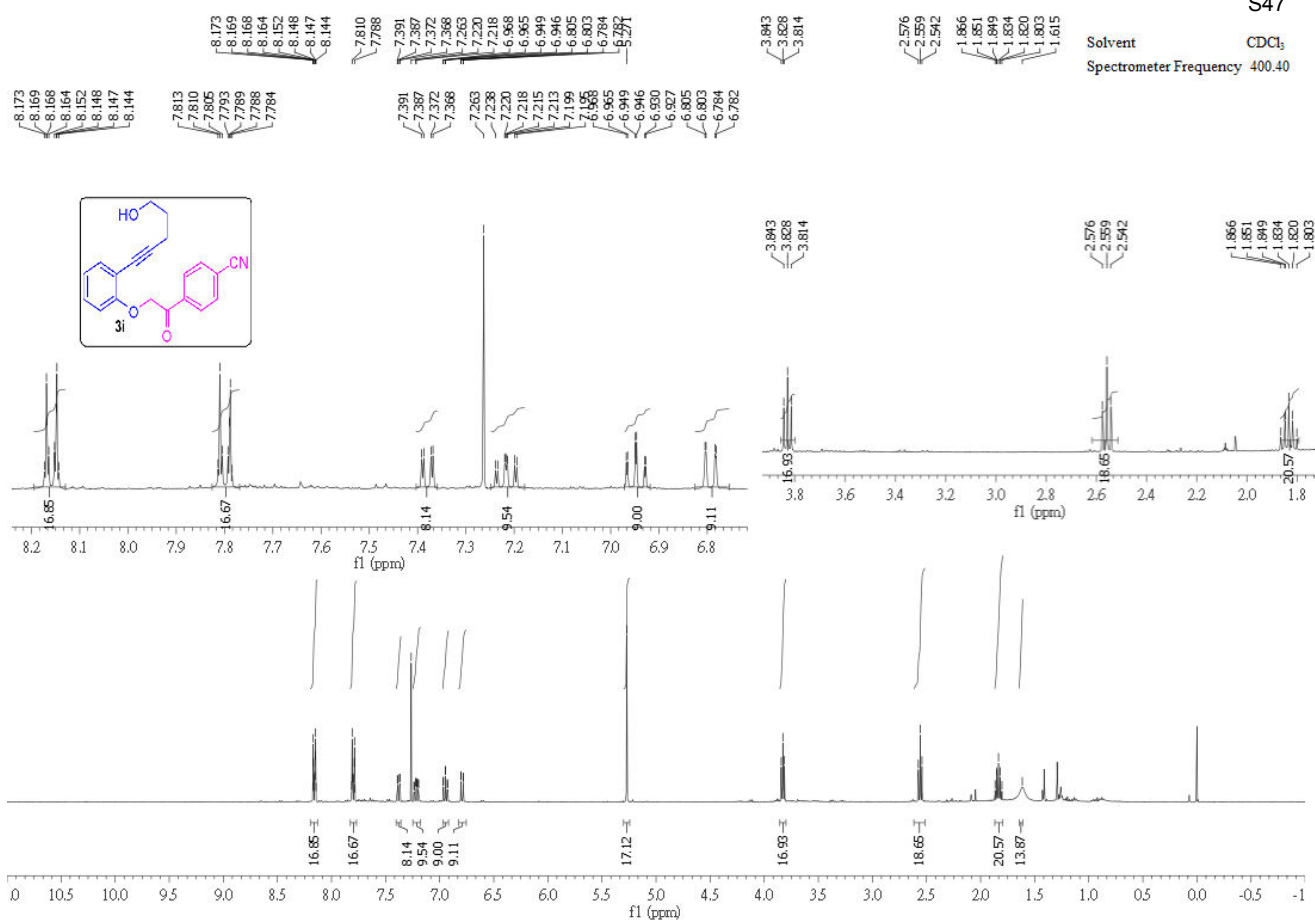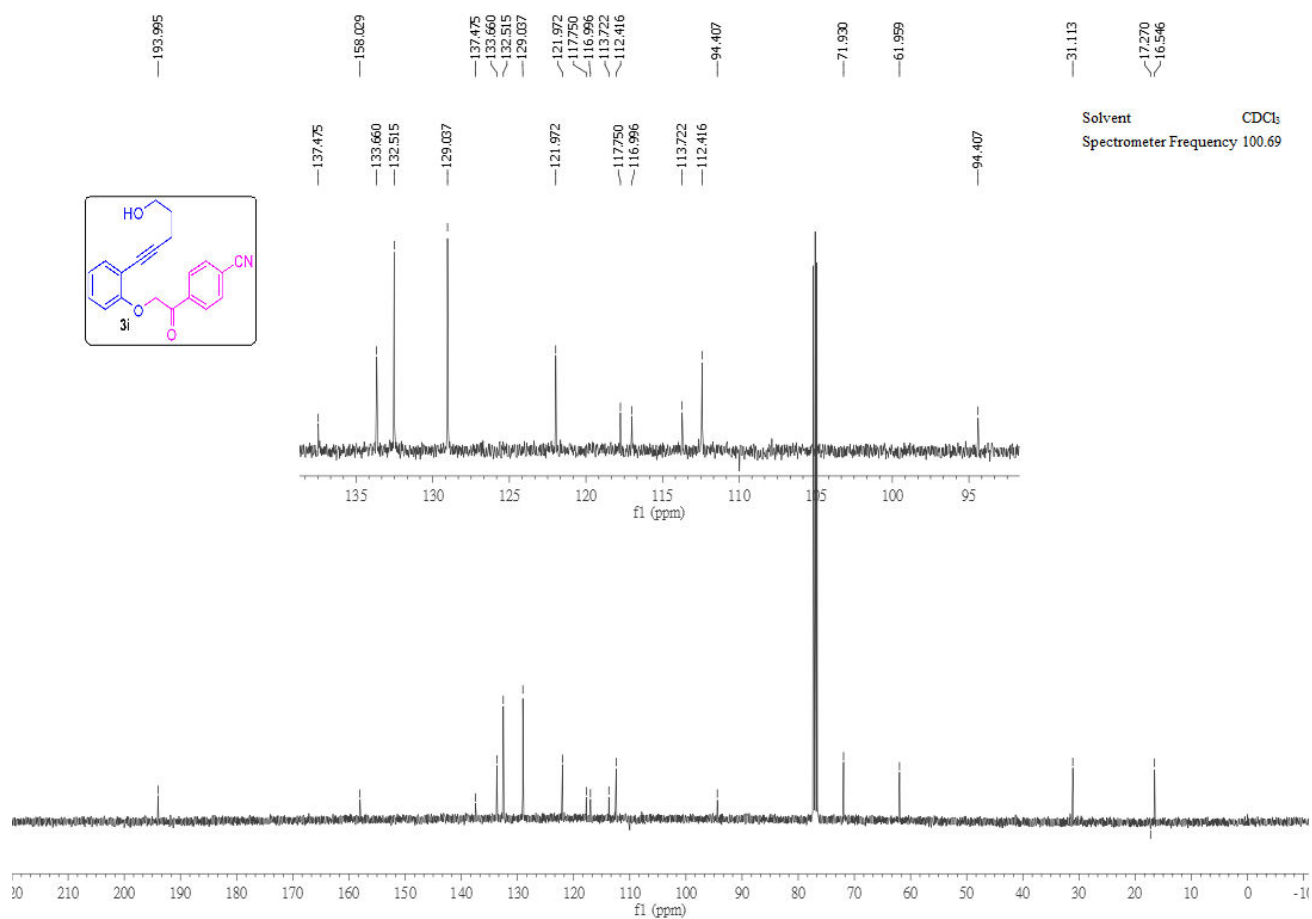



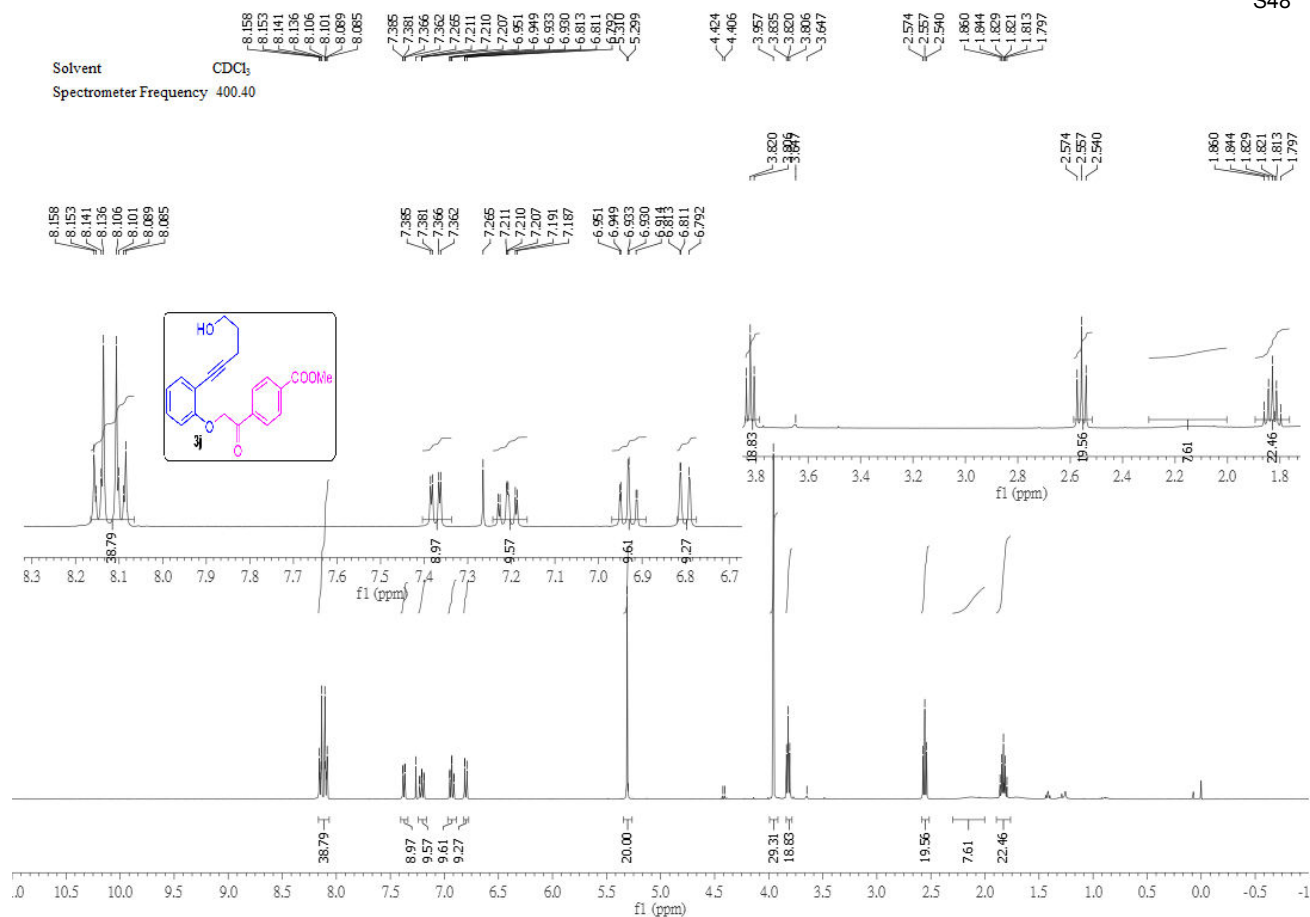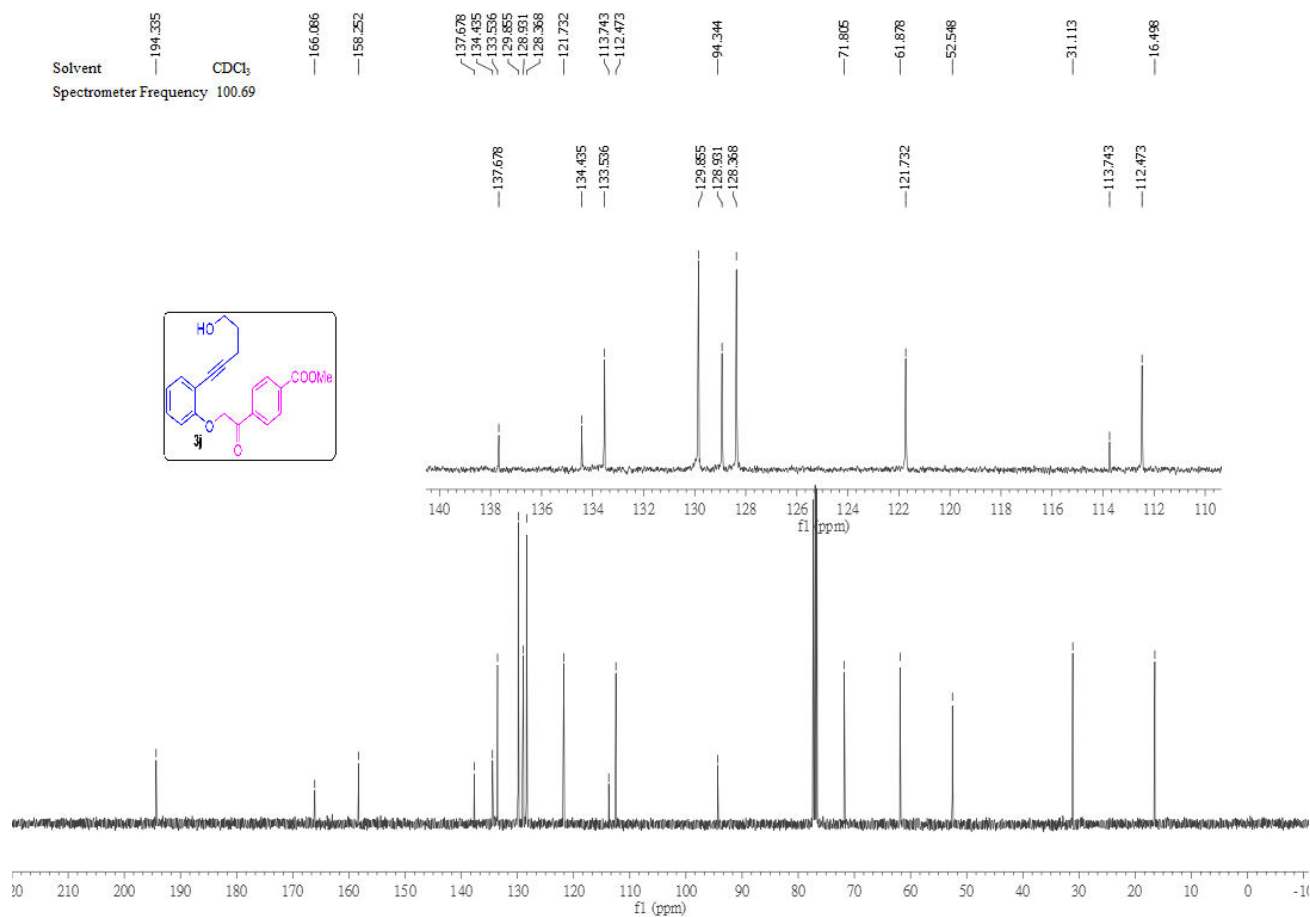



SQC/RP8/sm-4

Pulse Sequence: s2pu1  
 Mercury-400MHz "MercuryPlus400"  
 Date: Apr 28 2016  
 Solvent: CDCl3  
 Ambient temperature  
 Total 32 repetitions

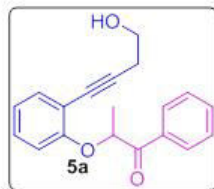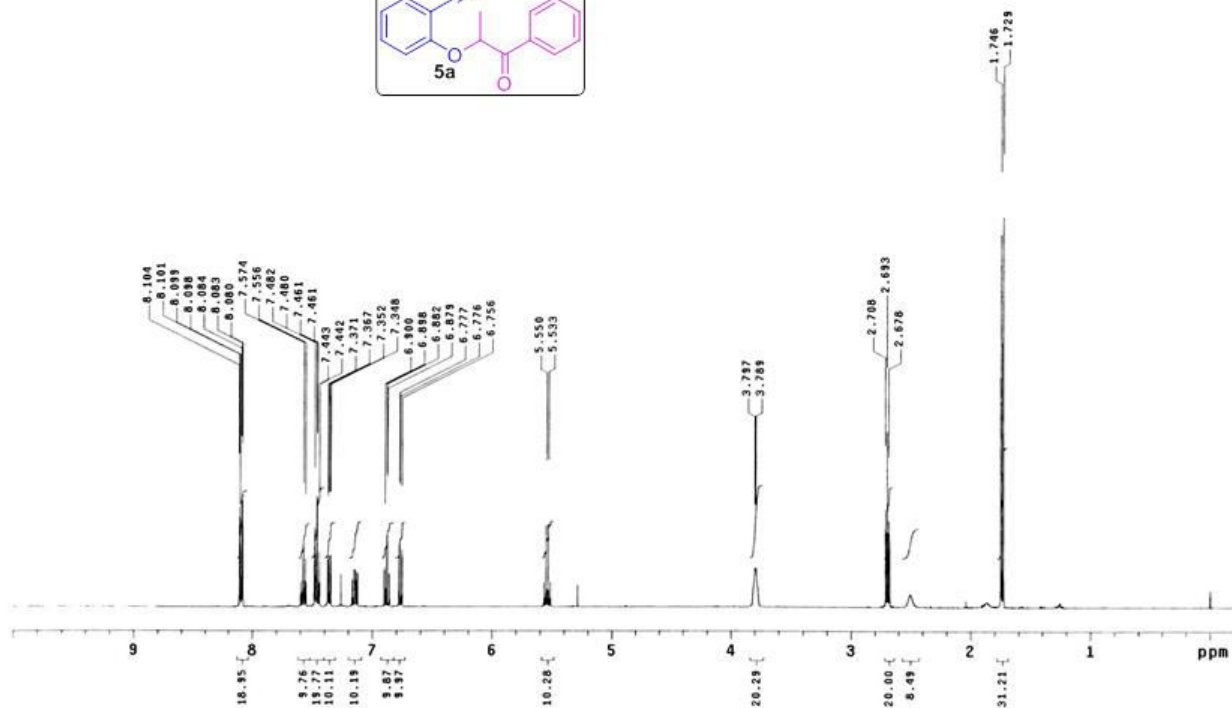

SQC/RP8/sm-4

Pulse Sequence: s2pu1  
 Mercury-400MHz "MercuryPlus400"  
 Date: Apr 28 2016  
 Solvent: CDCl3  
 Ambient temperature  
 Total 1688 repetitions

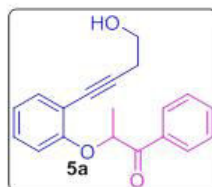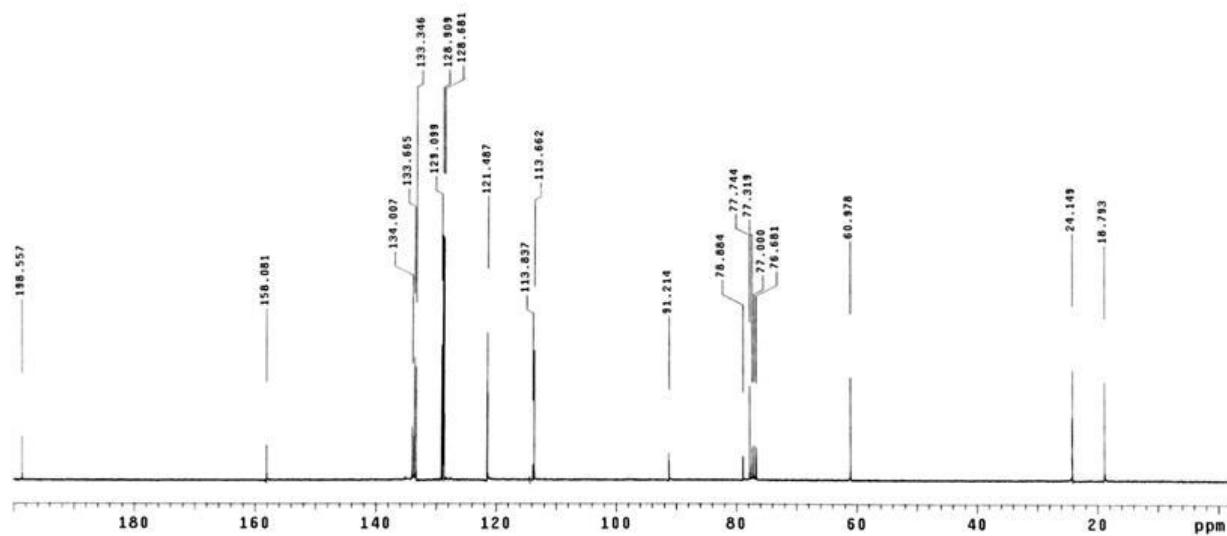



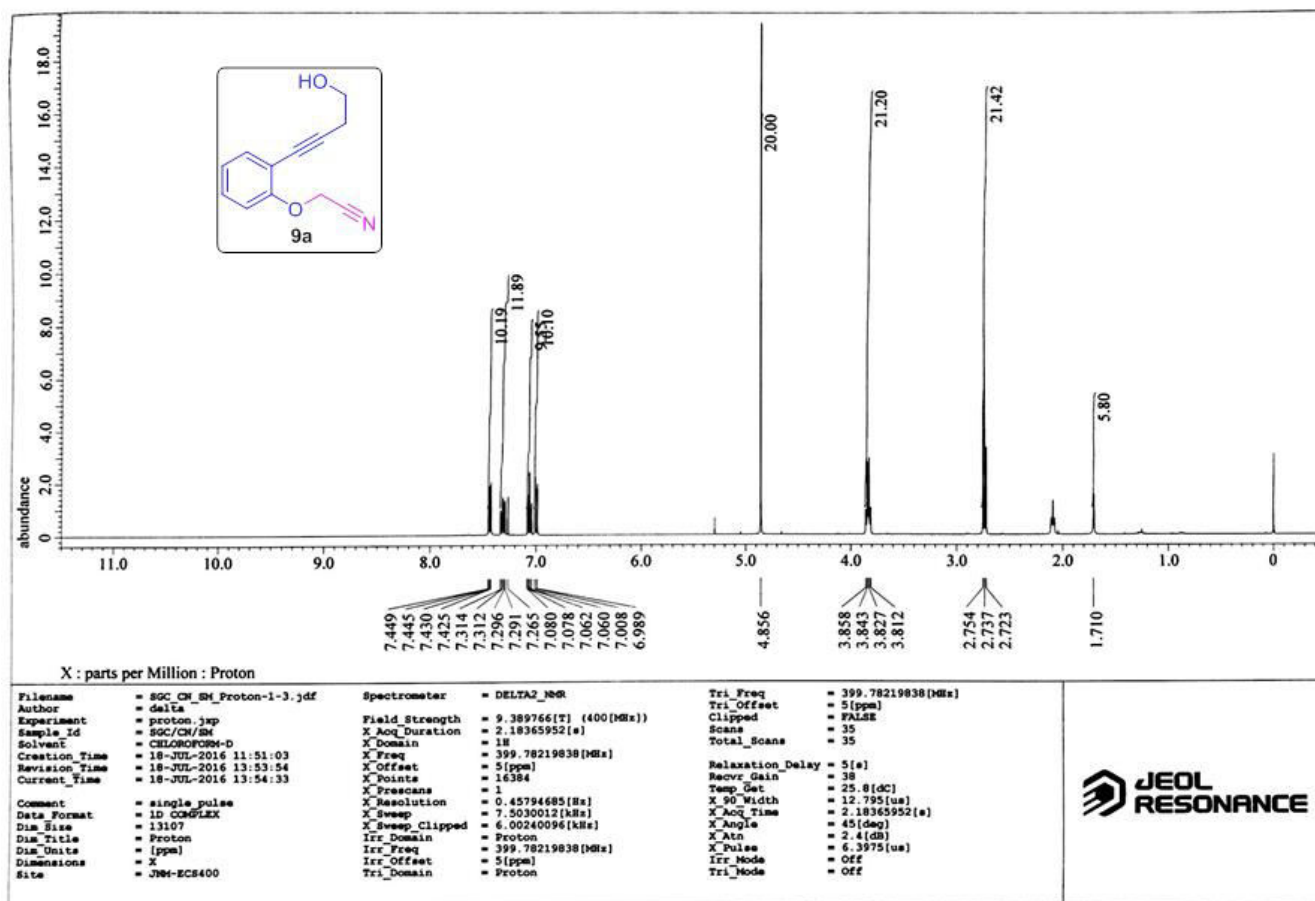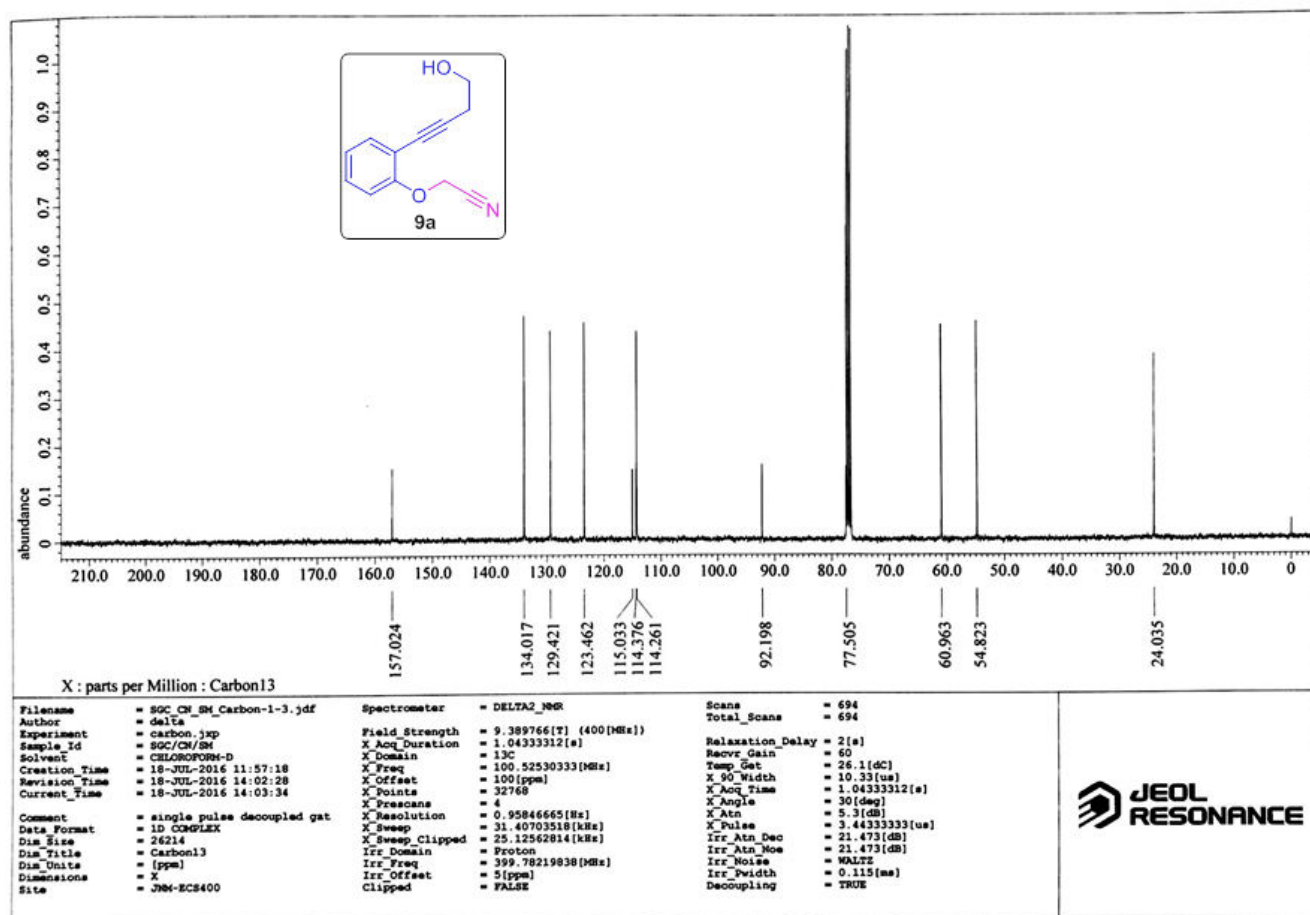



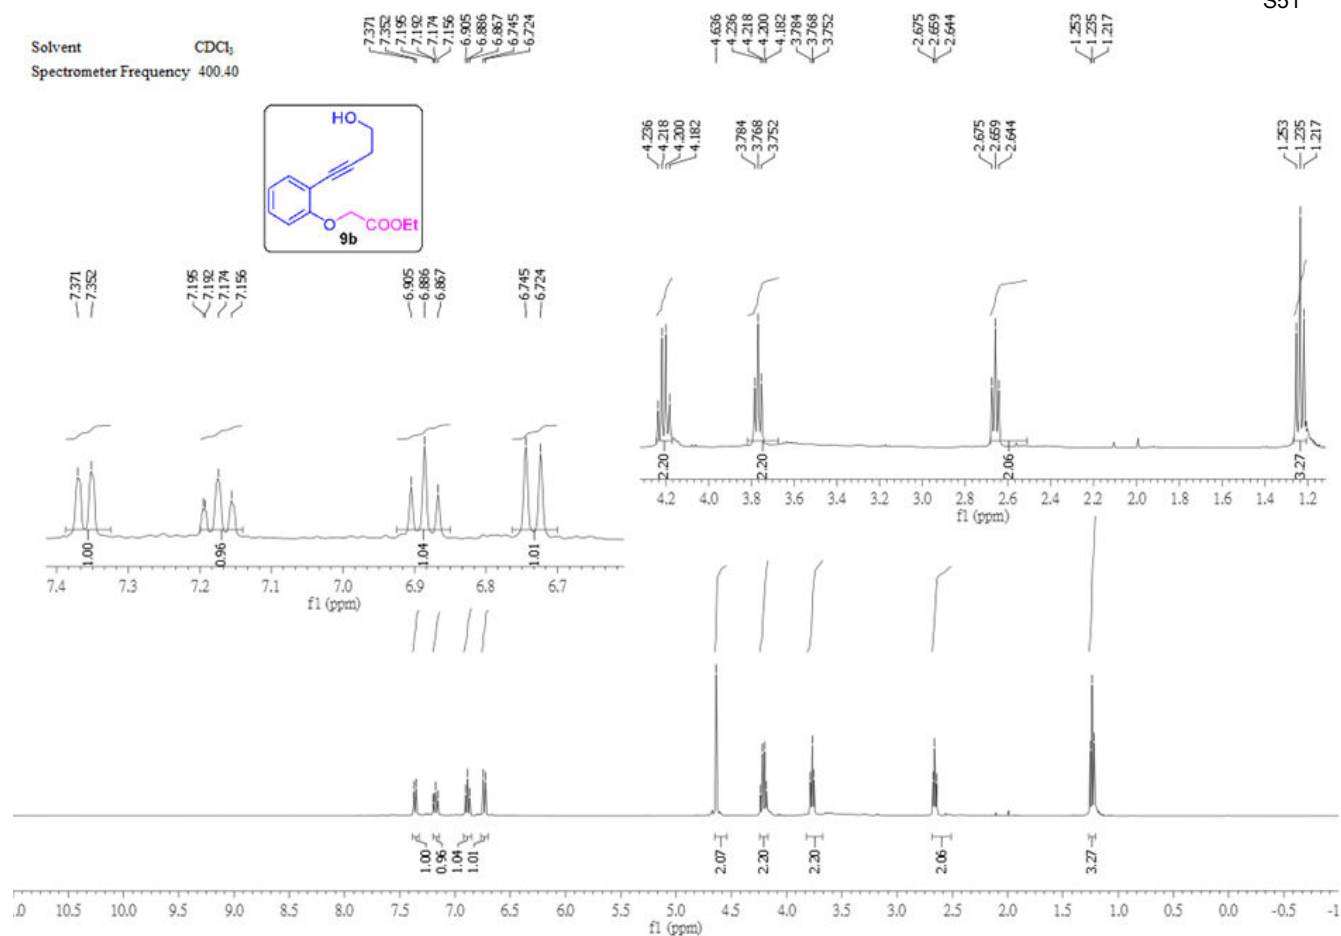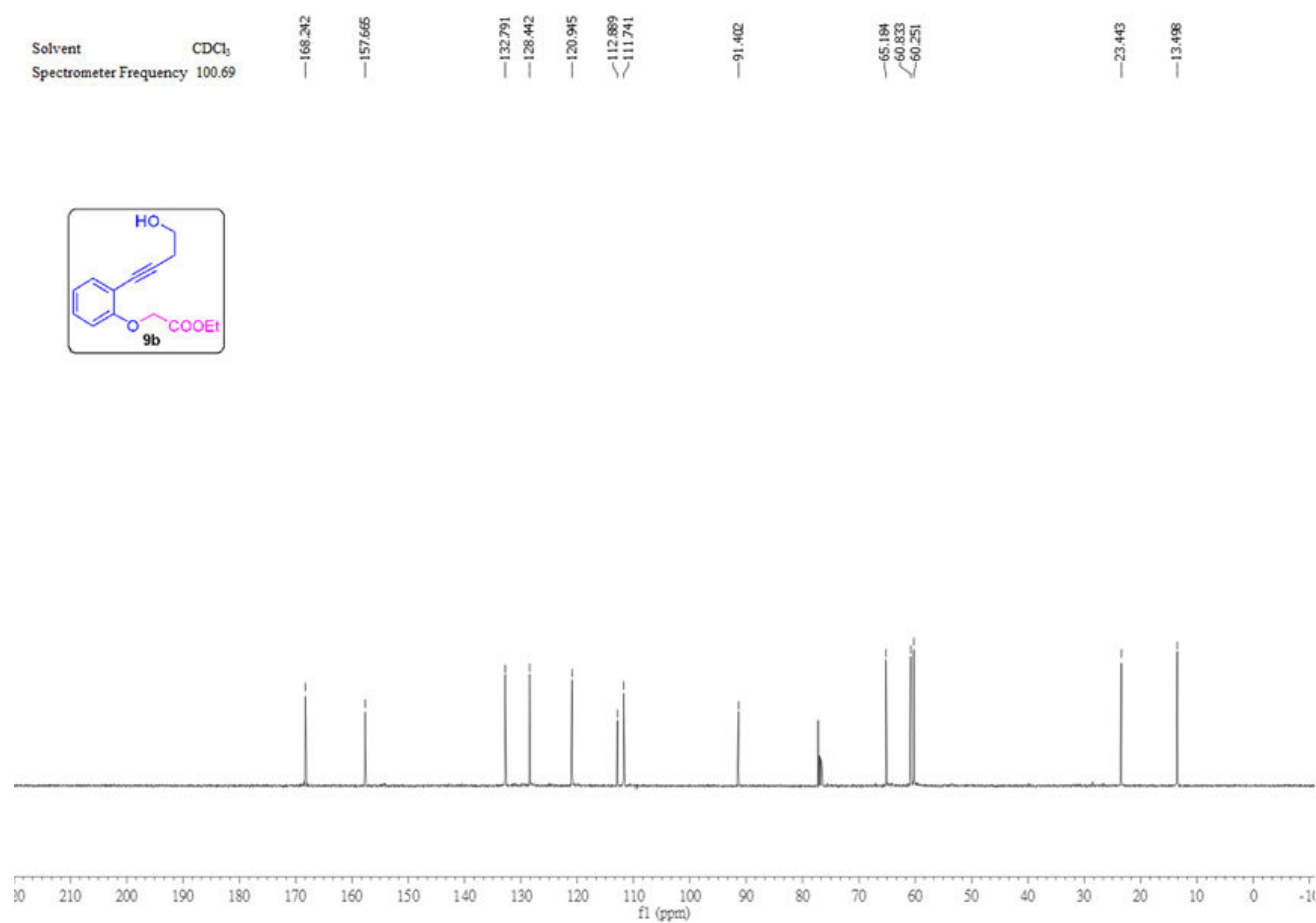



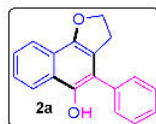

8.269  
8.268  
8.266  
8.260  
8.250  
8.245  
8.244  
7.869  
7.865  
7.859  
7.854  
7.852  
7.489  
7.485  
7.478  
7.472  
7.469  
7.466  
7.455  
7.451  
7.443  
7.438  
7.388  
7.378  
7.371  
7.364  
7.357  
4.671  
4.649  
4.627  
3.174  
3.152  
3.130

Solvent d-acetone  
Spectrometer Frequency 400.40

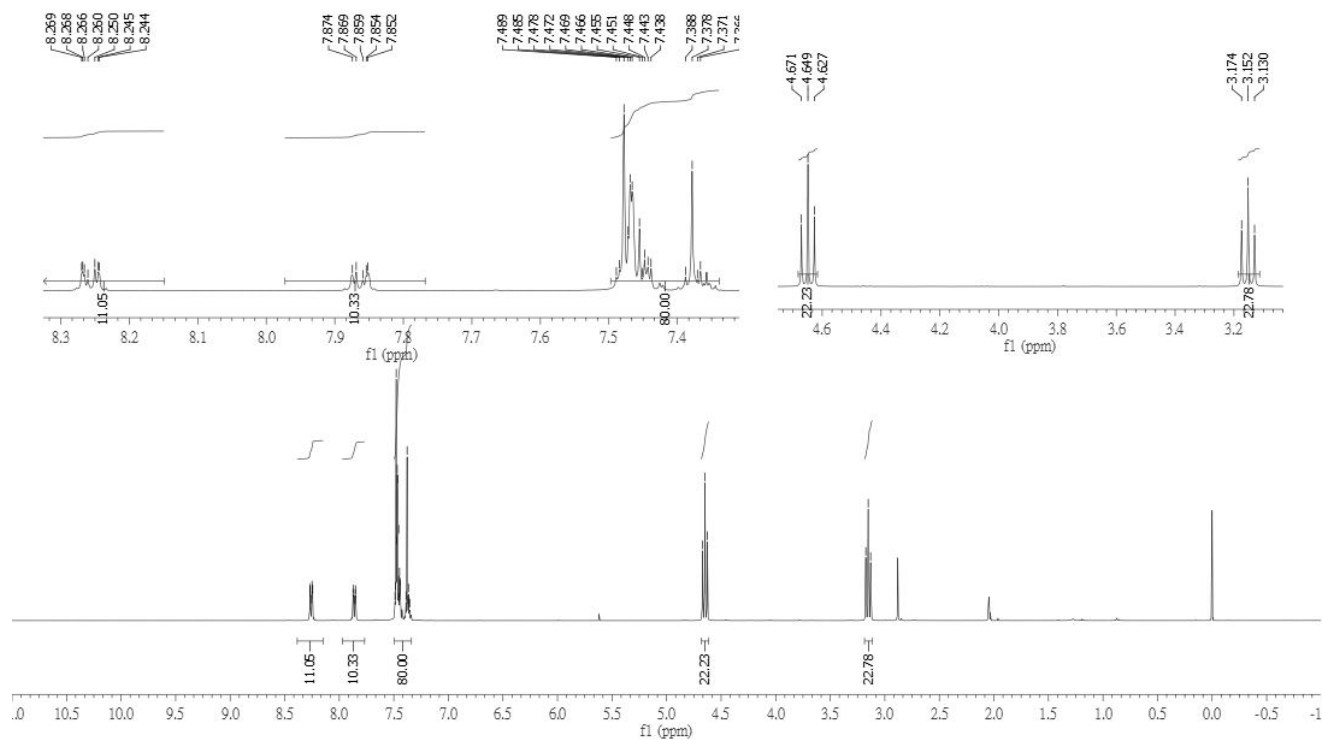

Solvent d-acetone  
Spectrometer Frequency 100.69

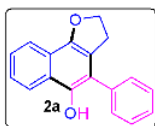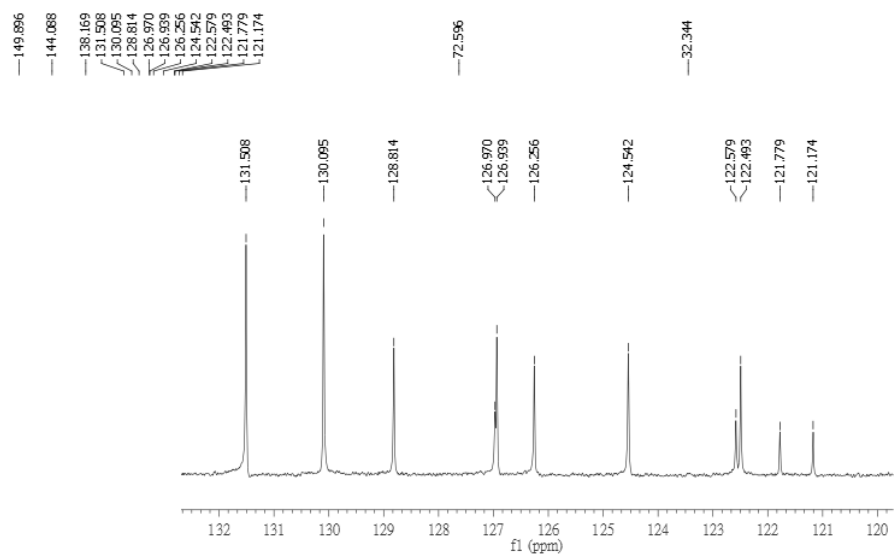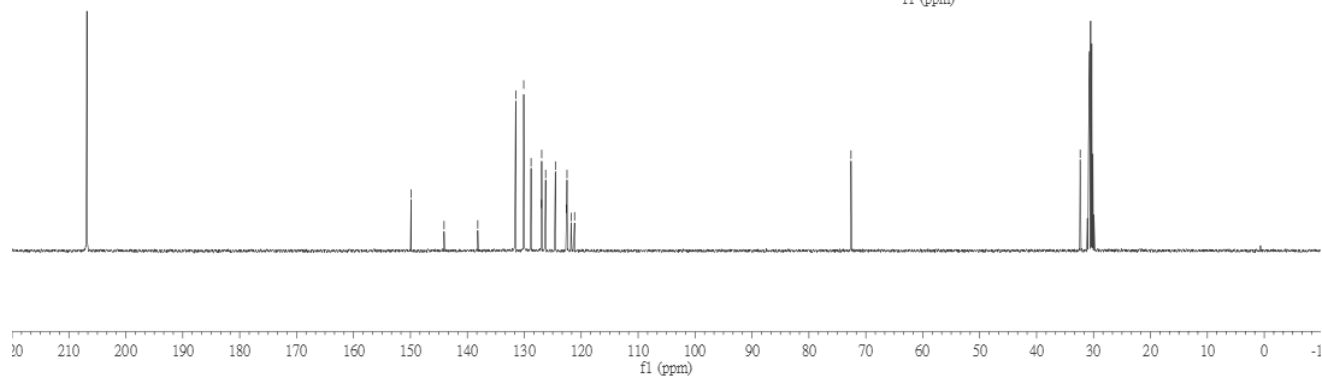



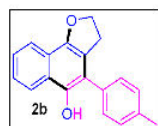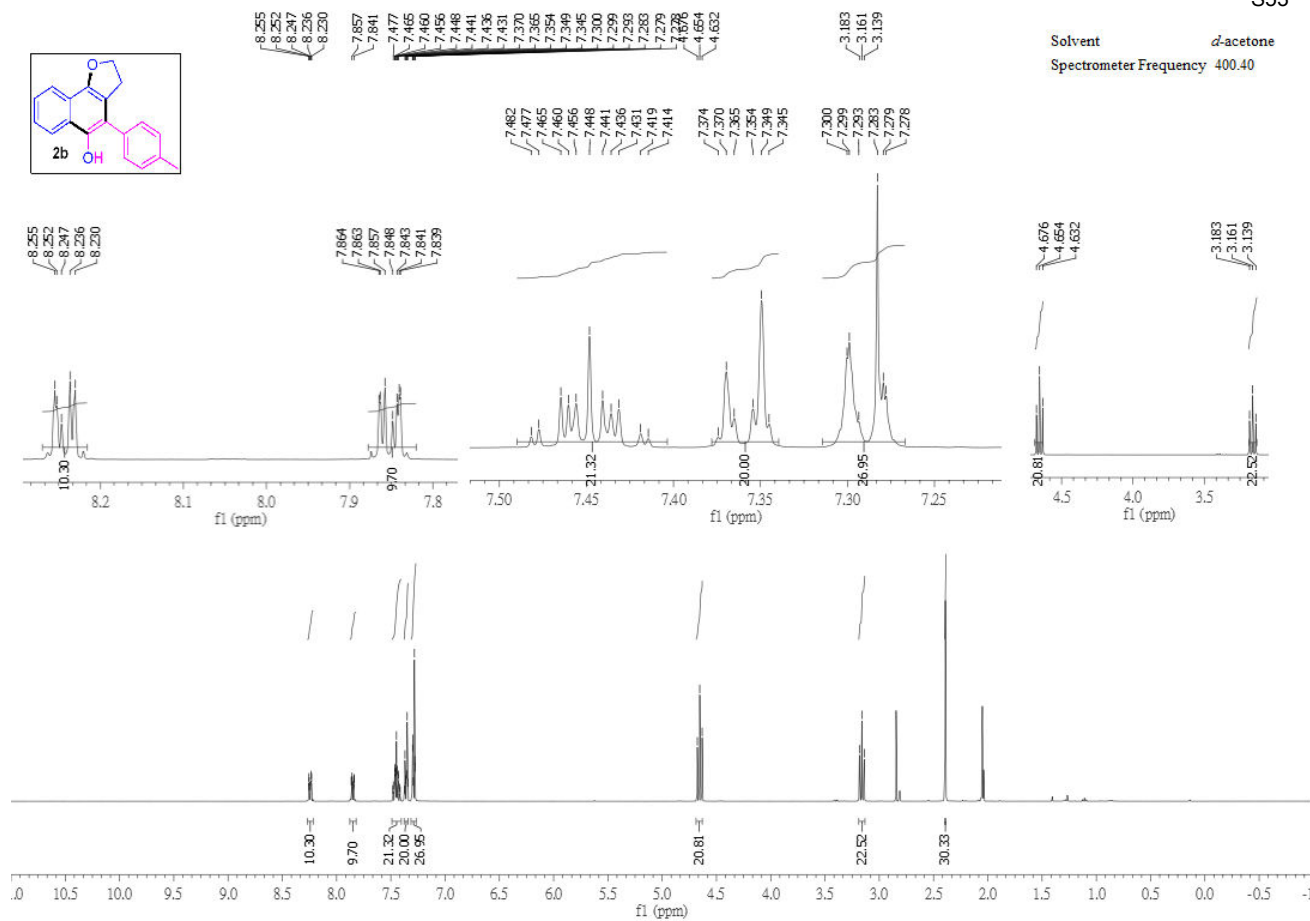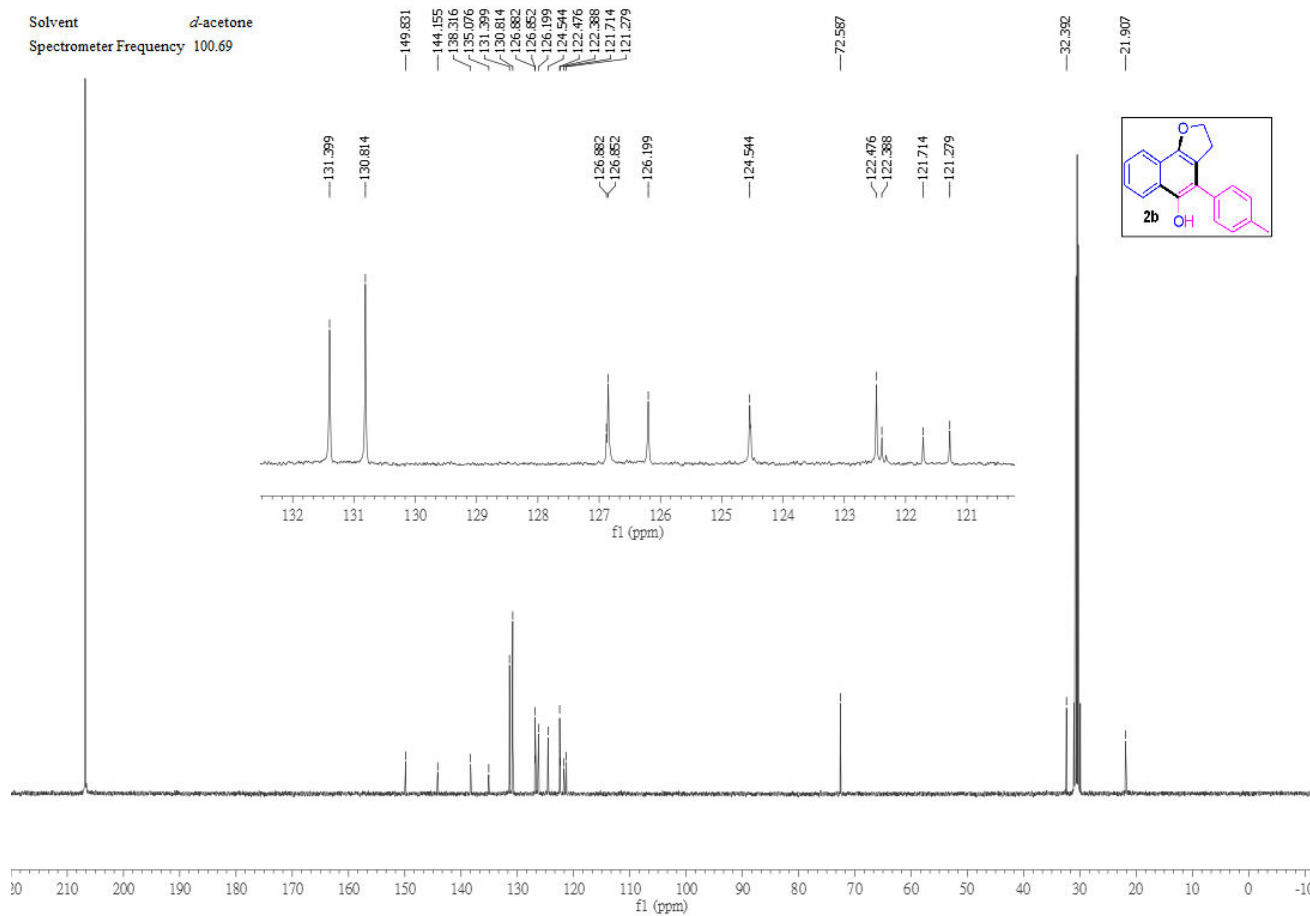



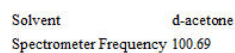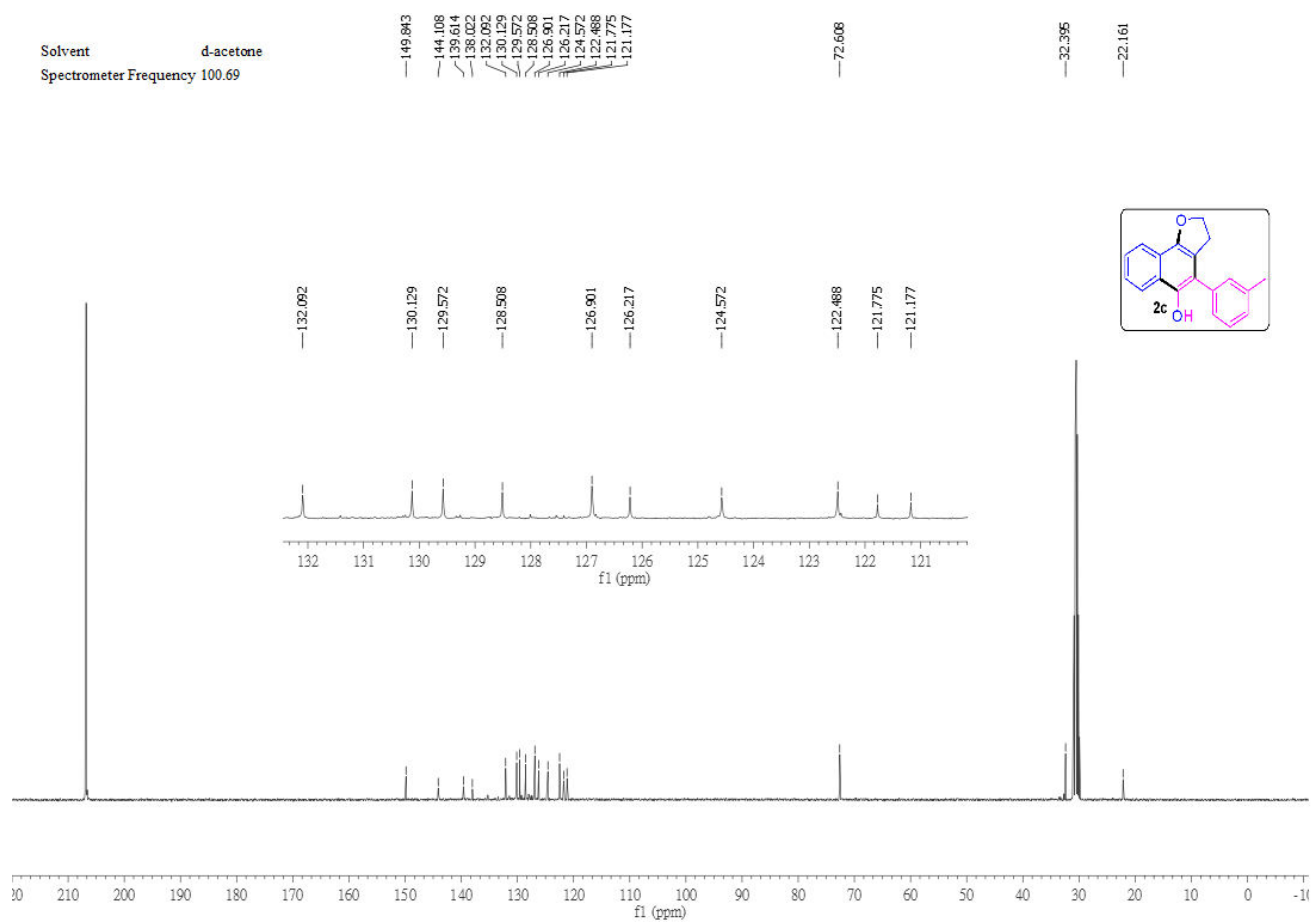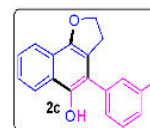



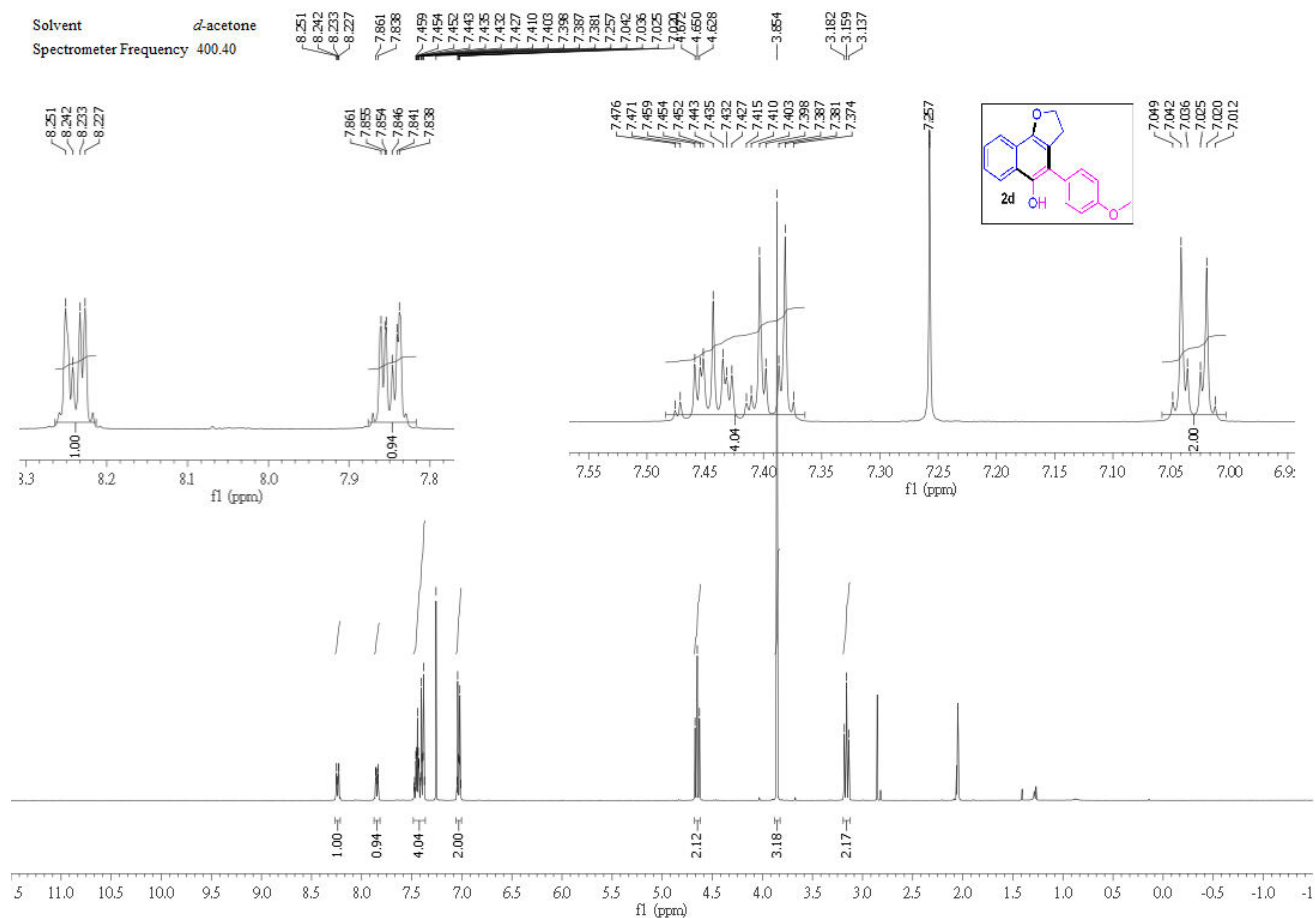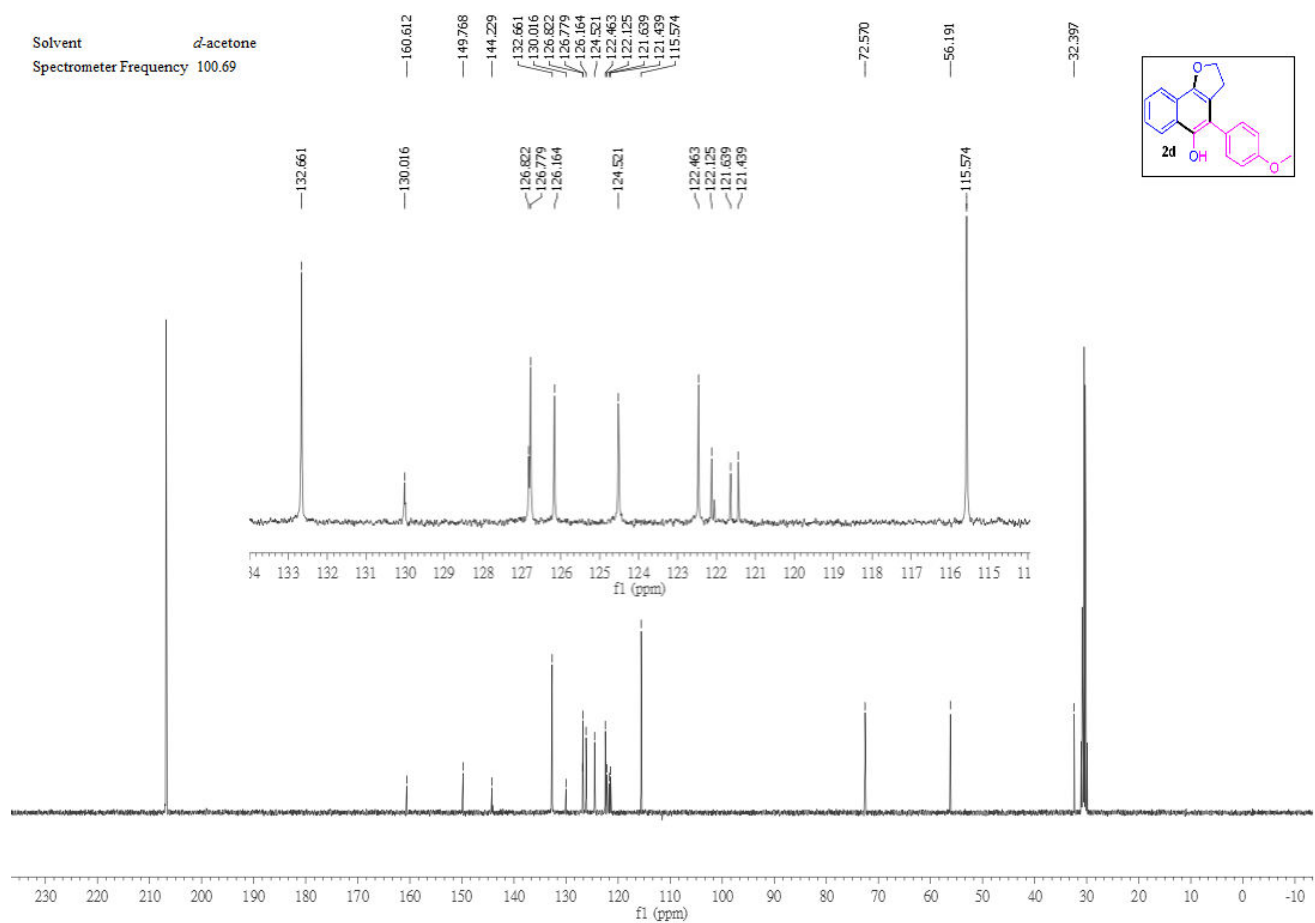



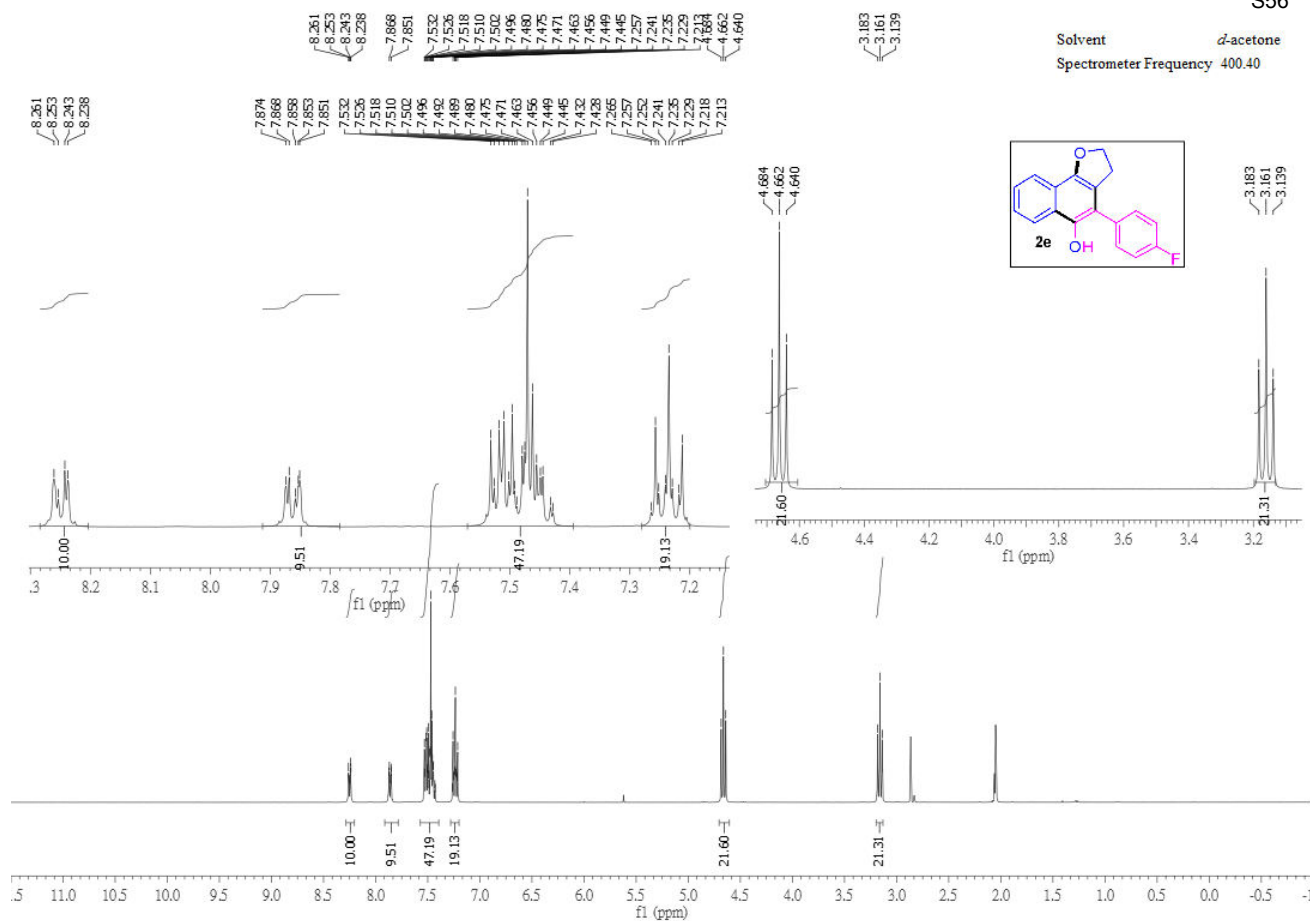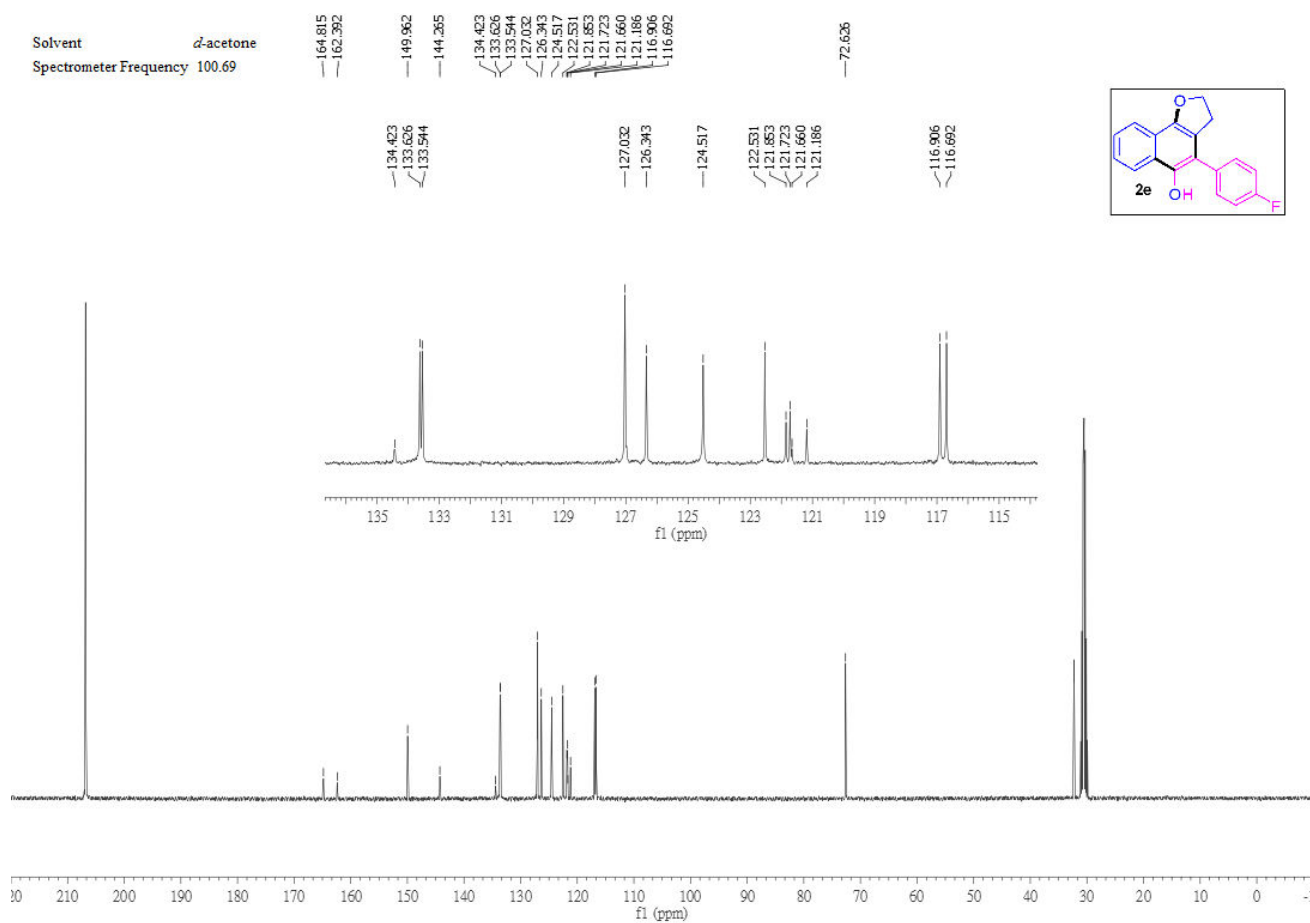



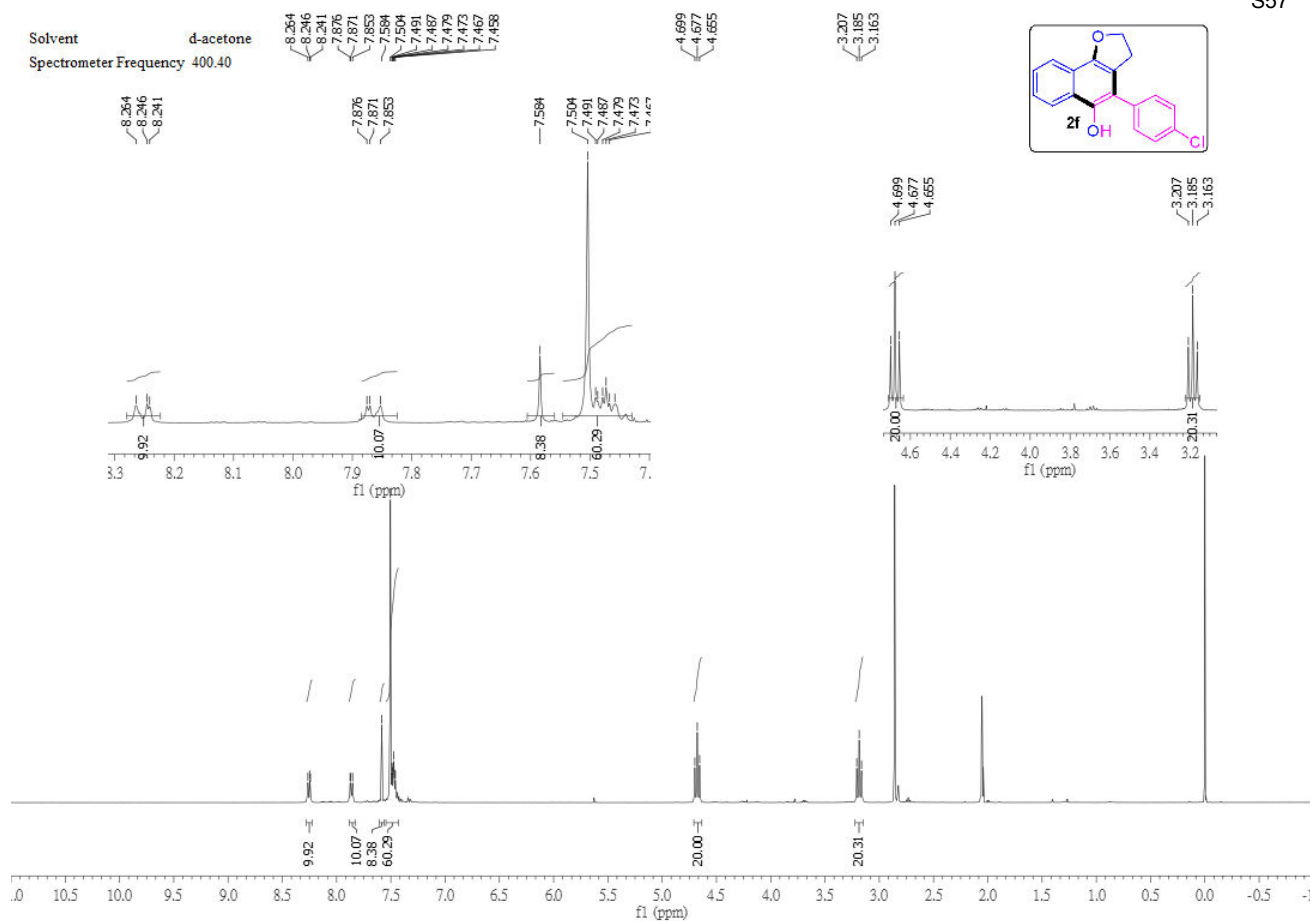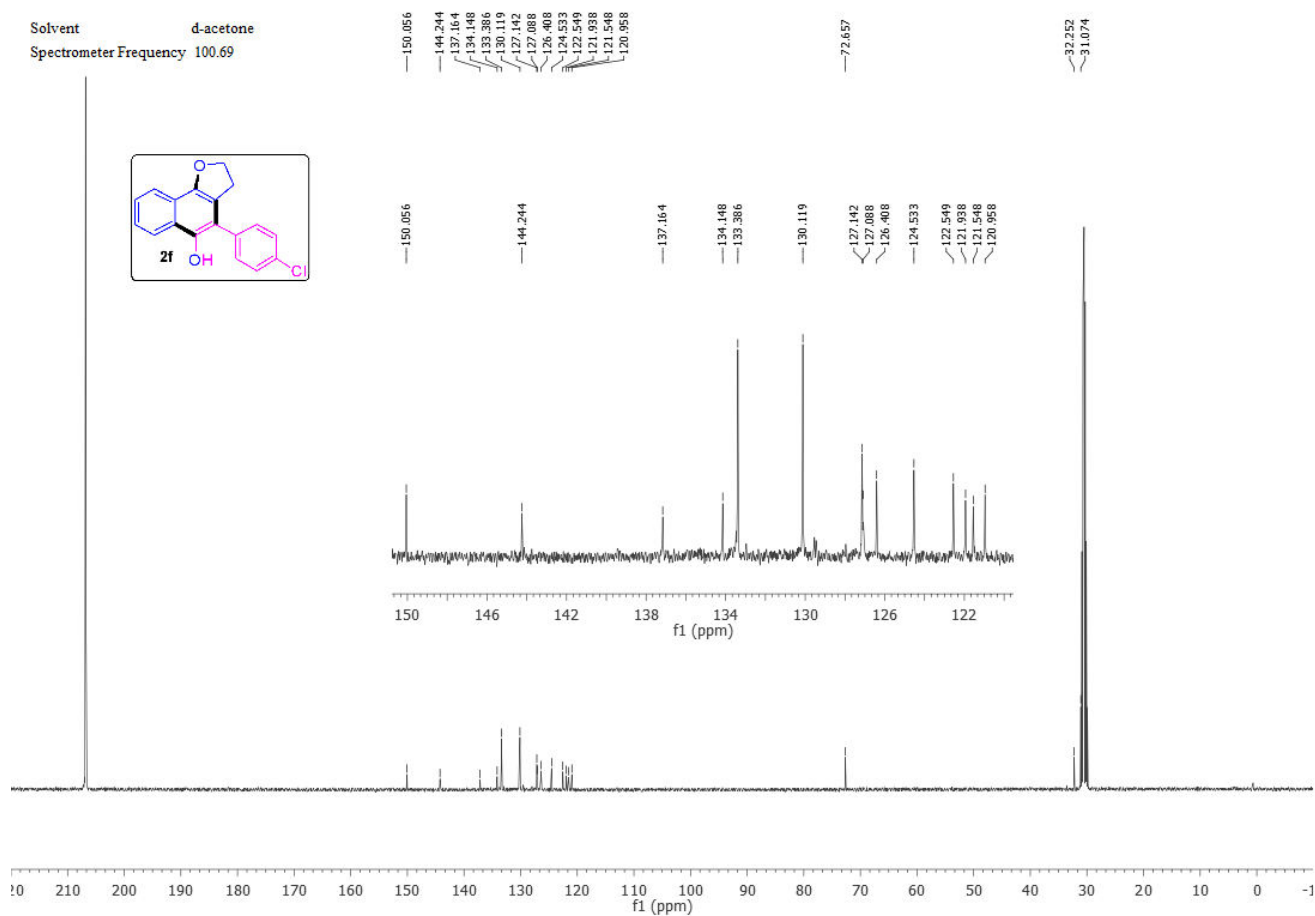



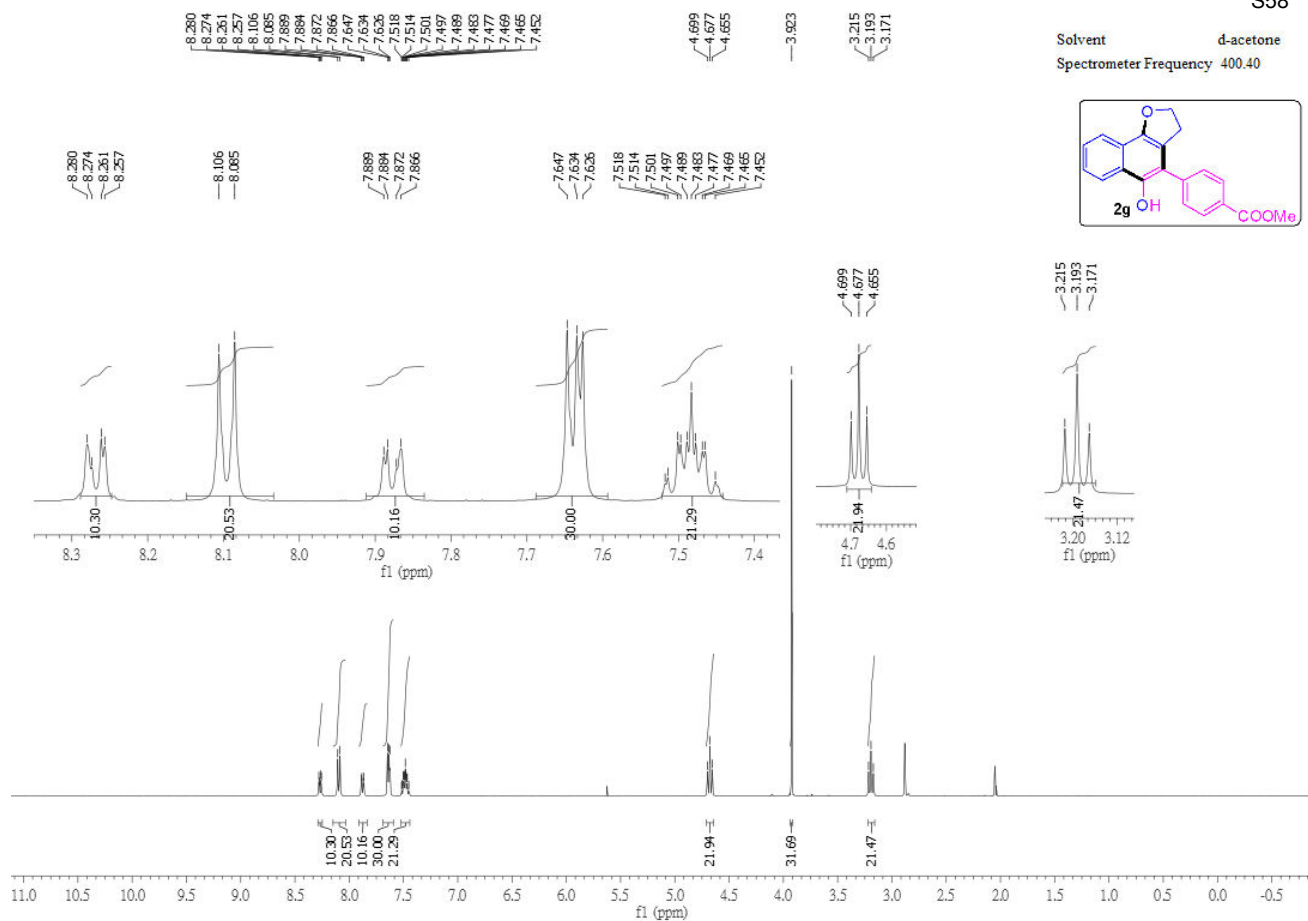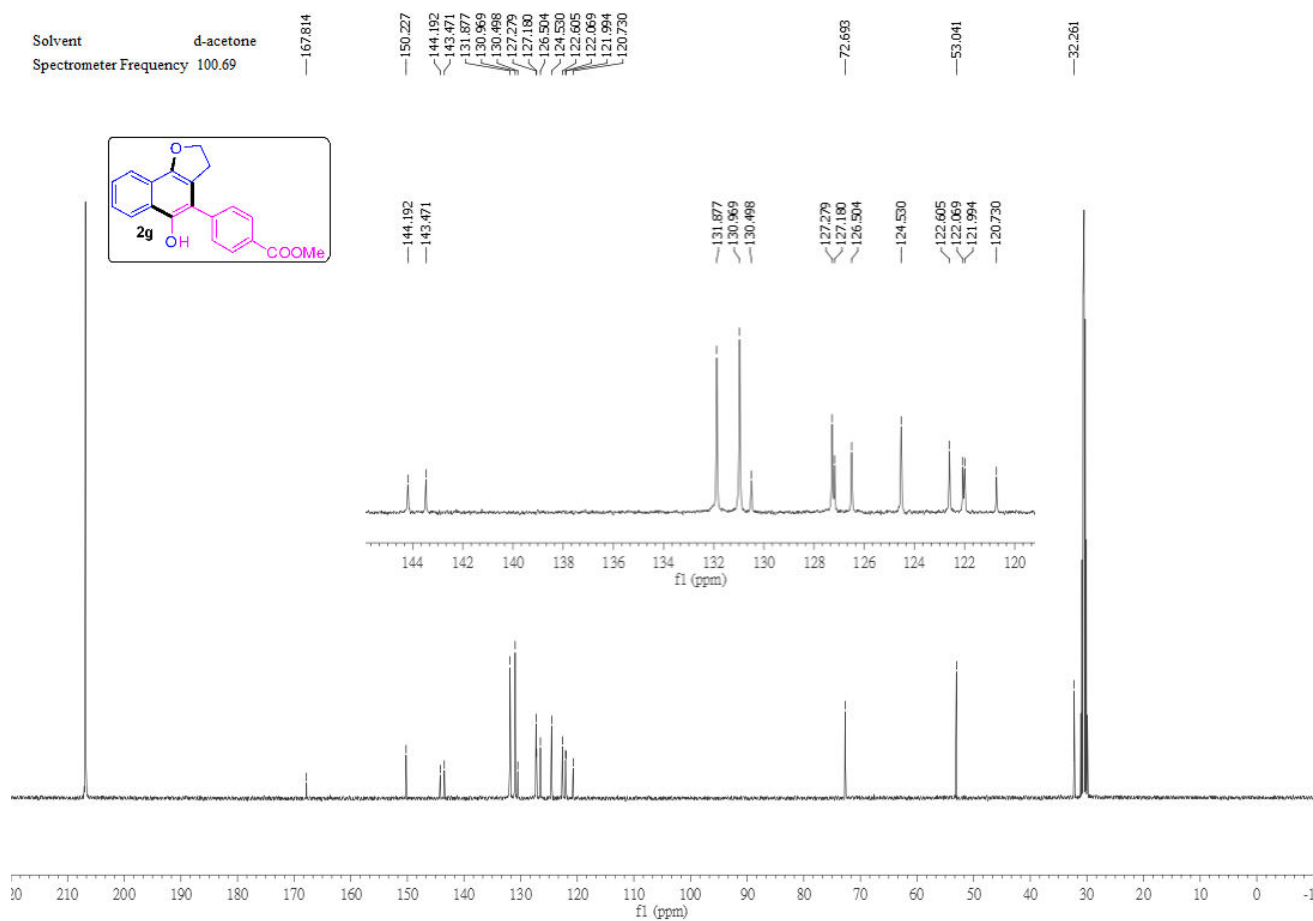



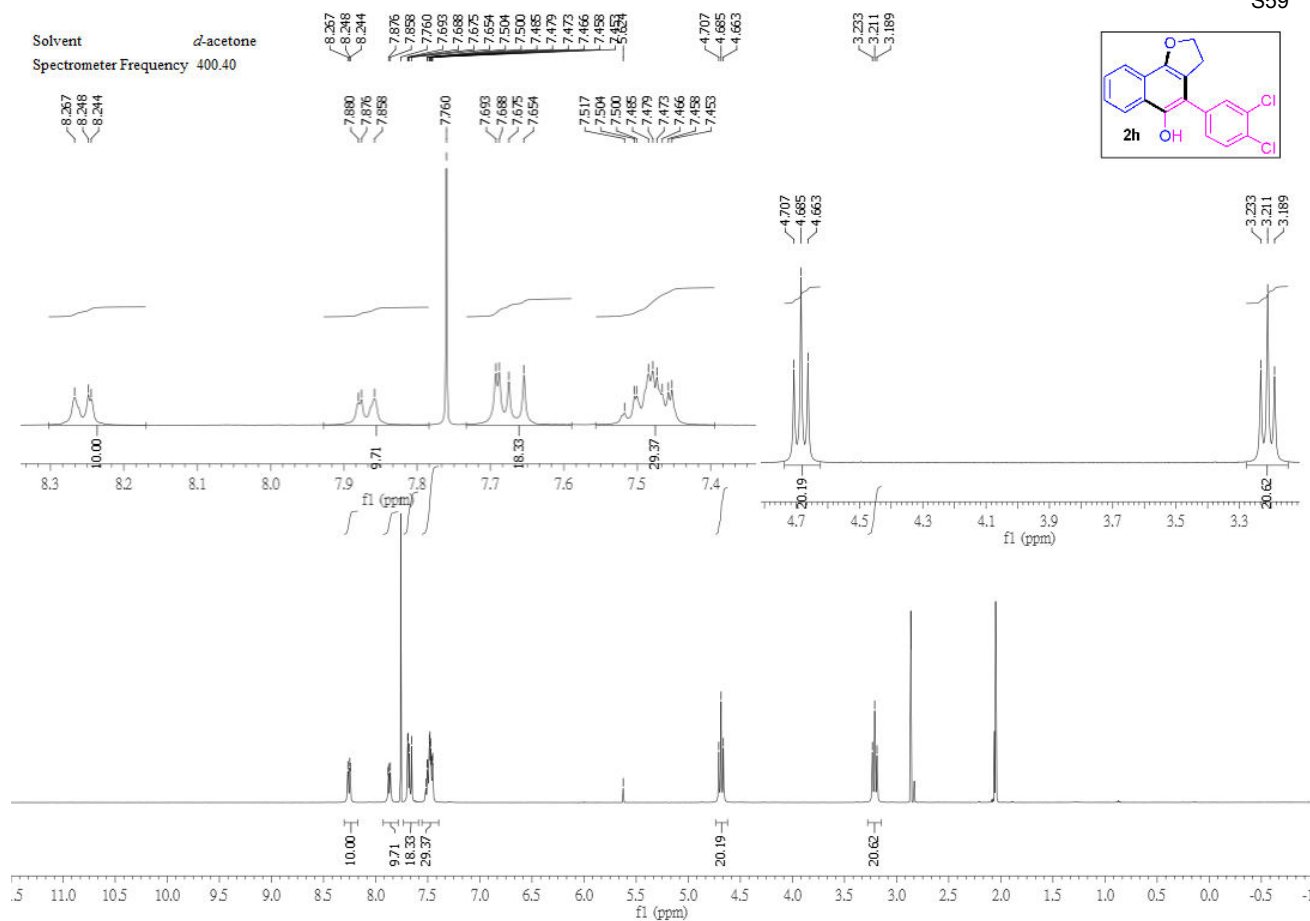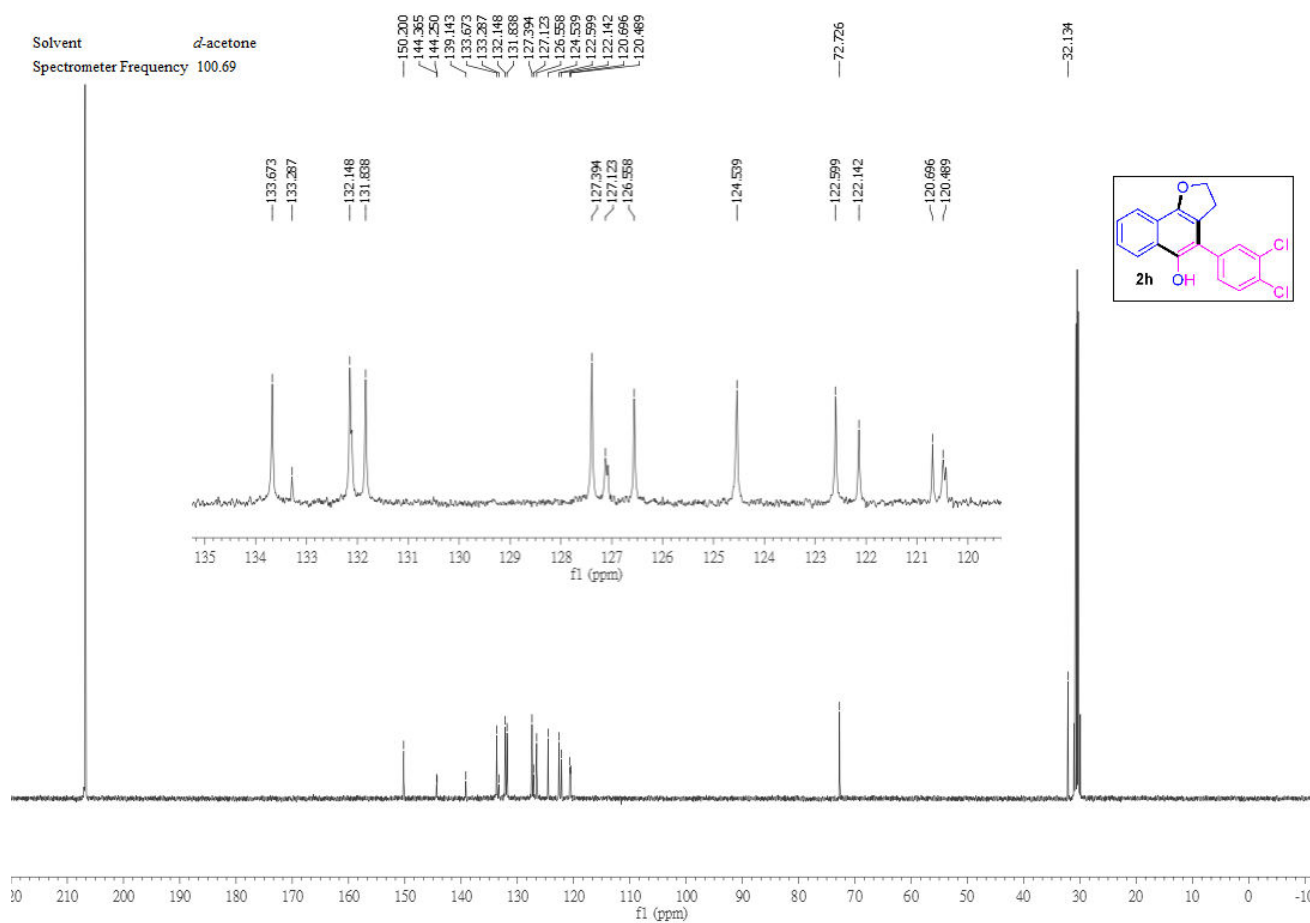



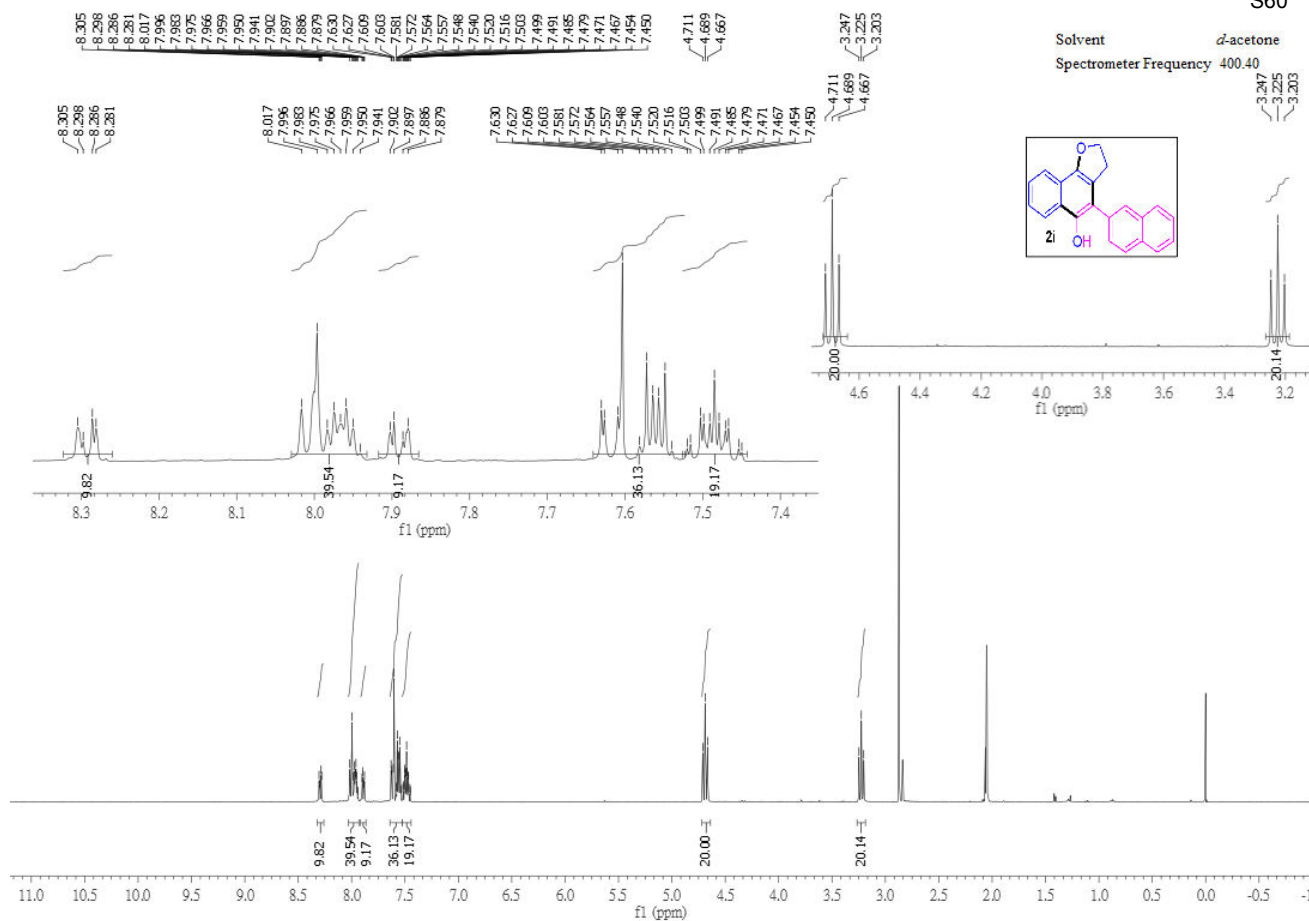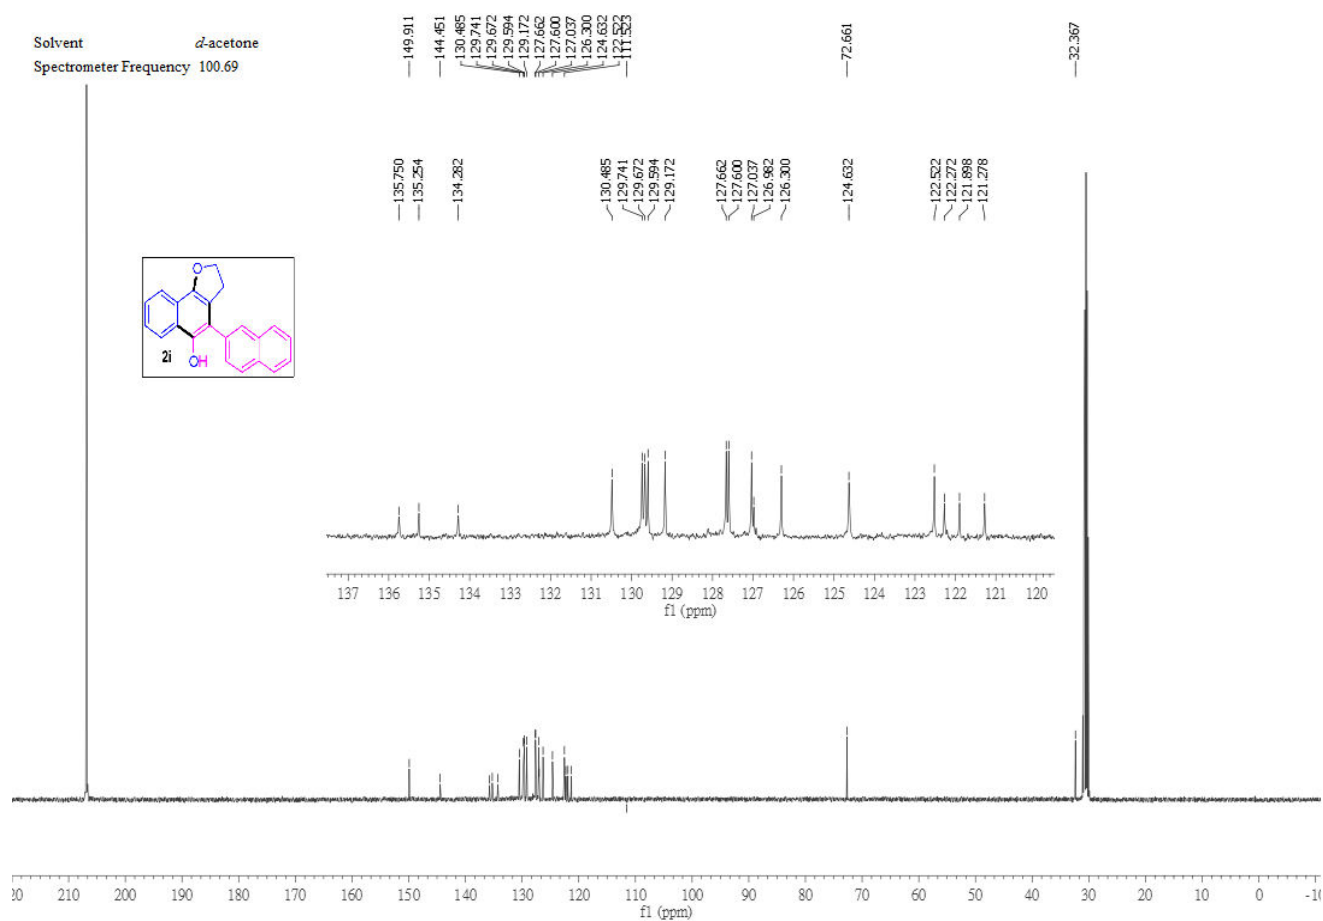



S61

Solvent *d*-acetone  
Spectrometer Frequency 400.40

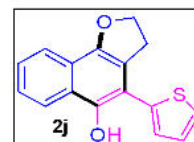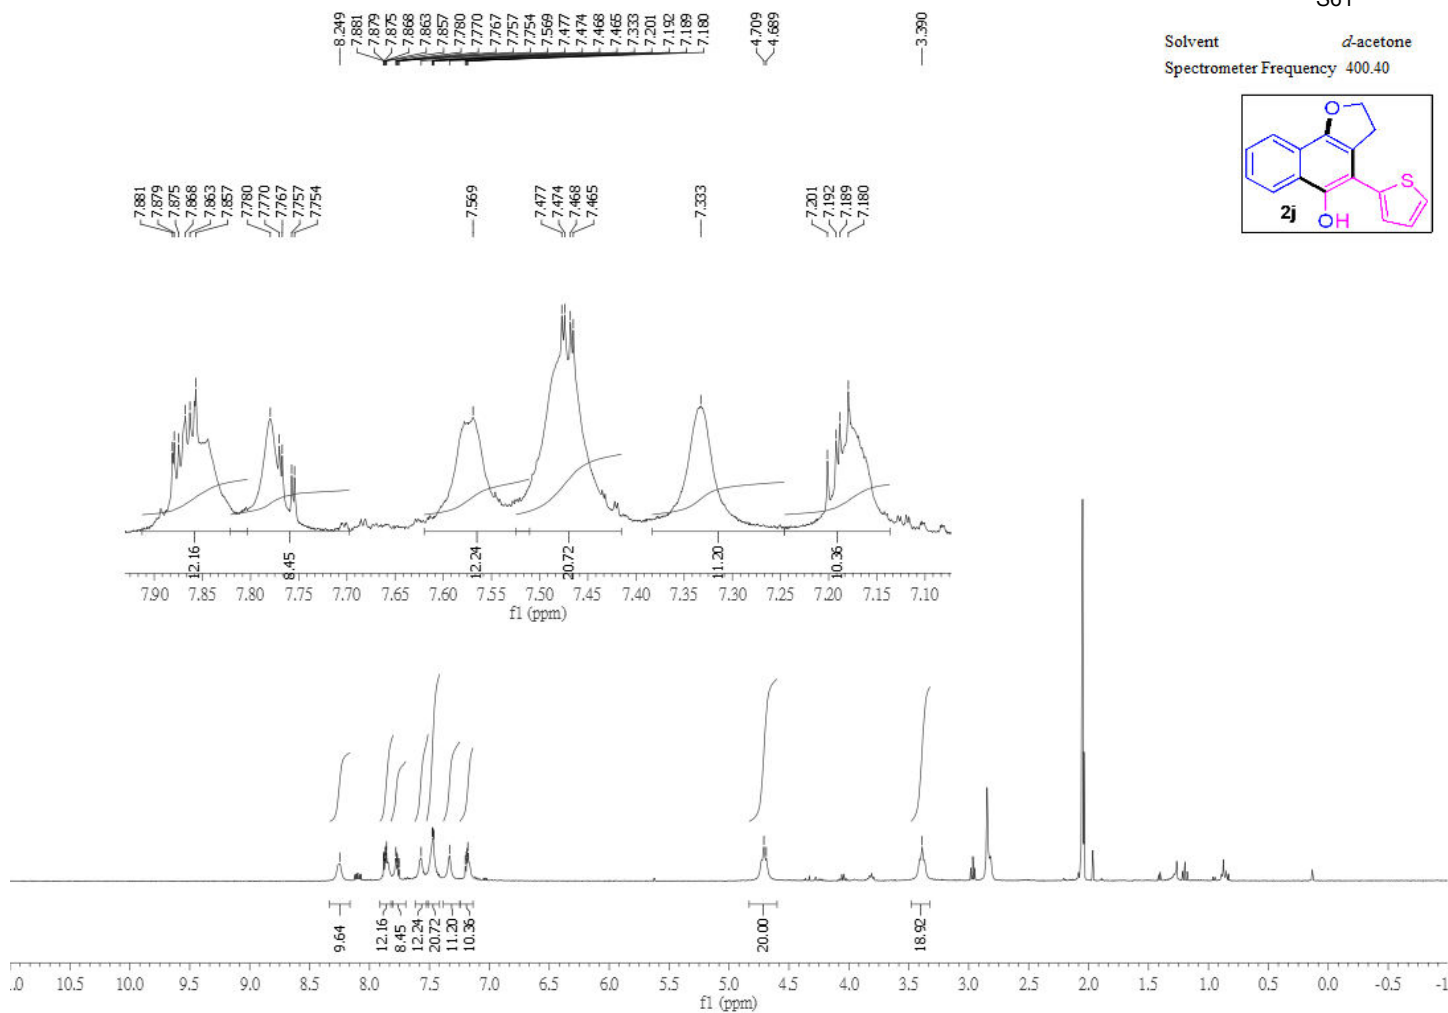

## FT-MS

Analysis Name D:\Data\4\2J\_000007.d  
Method broadband first signal  
Sample Name 2J  
Comment ESI Negative

5/30/2018 4:49:38 PM  
Instrument: FT-MS solarix

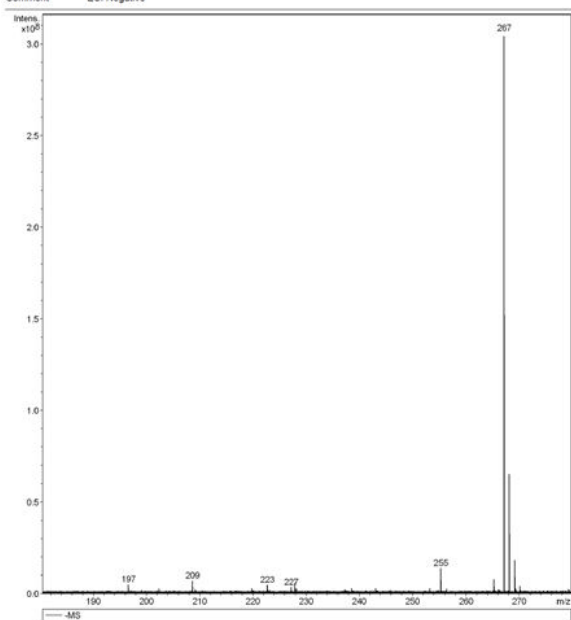

## Mass Spectrum SmartFormula Report

Analysis Name D:\Data\4\2J\_000006.d  
Method broadband first signal  
Sample Name 2J  
Comment ESI Negative

5/30/2018 4:48:35 PM  
Operator: YU HSIAO-CHING  
Instrument: BRUKER FT-MS solarix

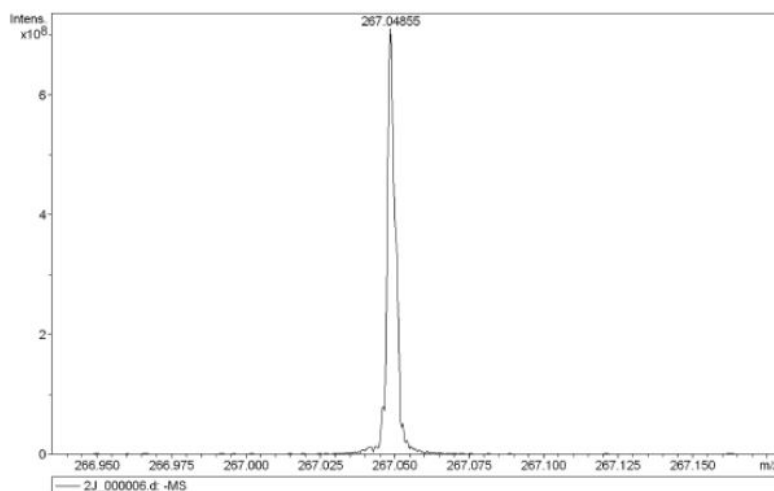

| Meas. m/z | # | Formula                                          | Score  | m/z       | err [mDa] | err [ppm] | mSigma | rdb  | e <sup>-</sup> Conf | N-Rule |
|-----------|---|--------------------------------------------------|--------|-----------|-----------|-----------|--------|------|---------------------|--------|
| 267.04855 | 1 | C <sub>16</sub> H <sub>11</sub> O <sub>2</sub> S | 100.00 | 267.04852 | -0.03     | -0.10     | 29.9   | 11.5 | even                | ok     |



| Year | Number of individuals (thousands) |
|------|-----------------------------------|
| 2005 | 2,405                             |
| 2006 | 2,389                             |
| 2007 | 2,372                             |
| 2008 | 1,964                             |
| 2009 | 1,954                             |
| 2010 | 1,951                             |
| 2011 | 1,948                             |
| 2012 | 1,938                             |
| 2013 | 1,935                             |
| 2014 | 1,932                             |
| 2015 | 1,922                             |
| 2016 | 1,915                             |
| 2017 | 1,905                             |

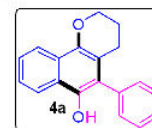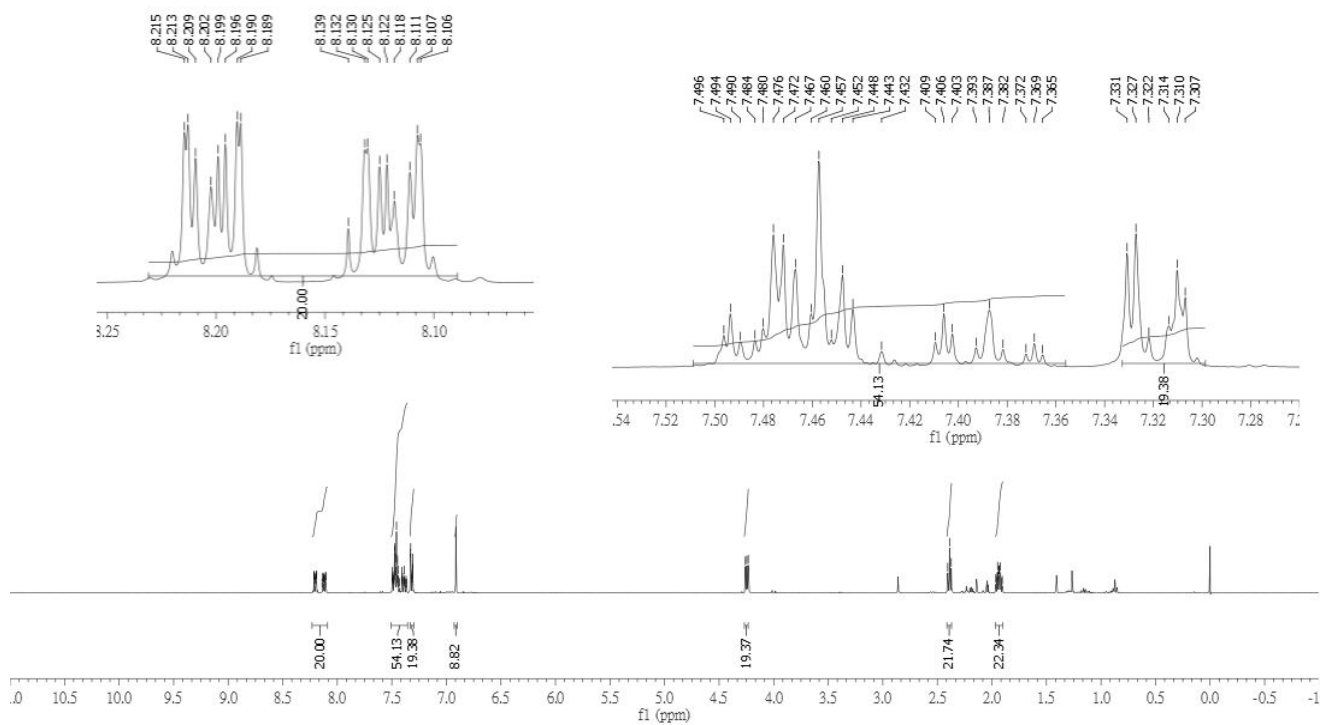

|                        |           |
|------------------------|-----------|
| Solvent                | d-acetone |
| Spectrometer Frequency | 100.69    |

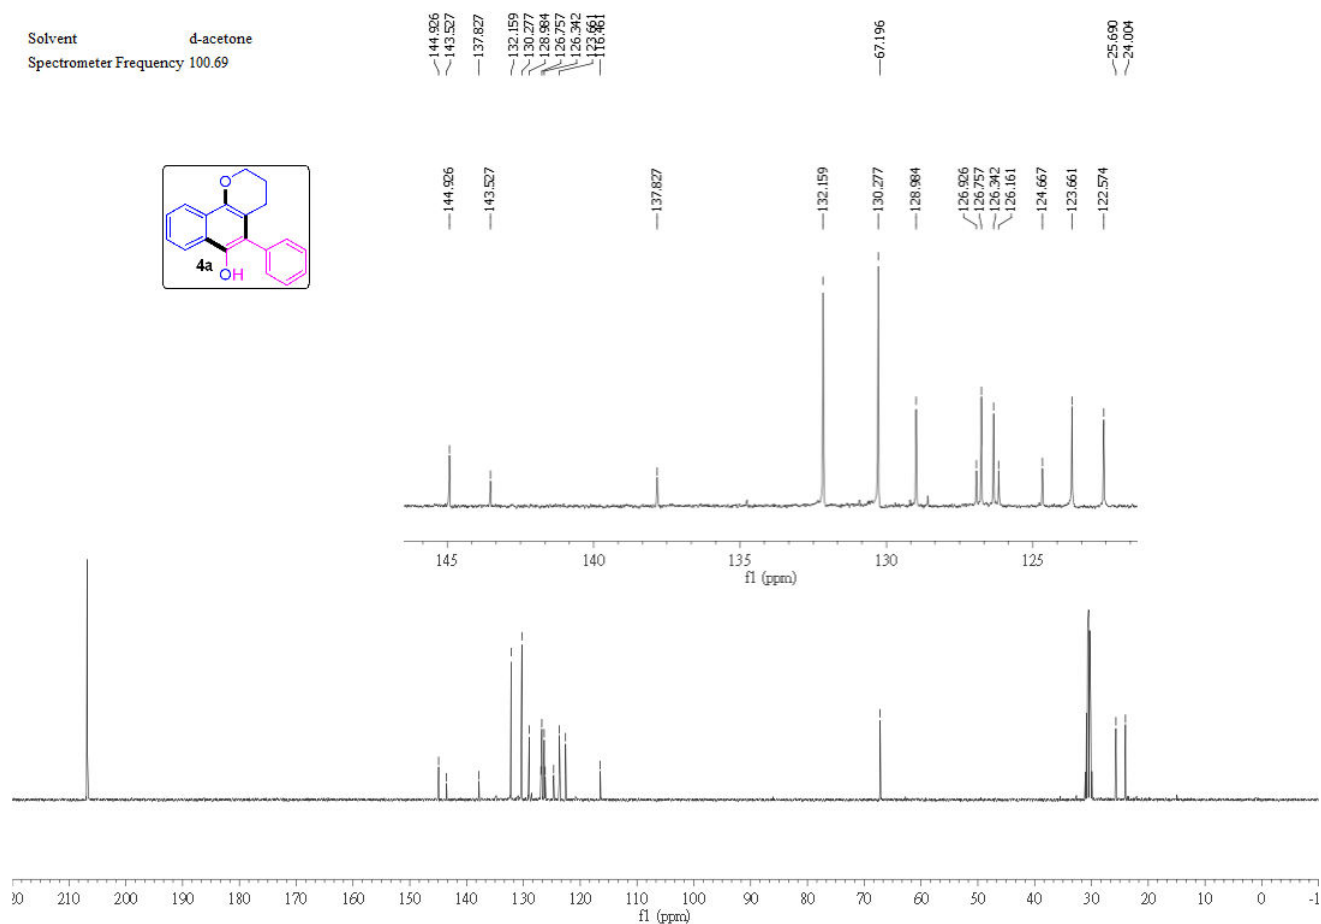



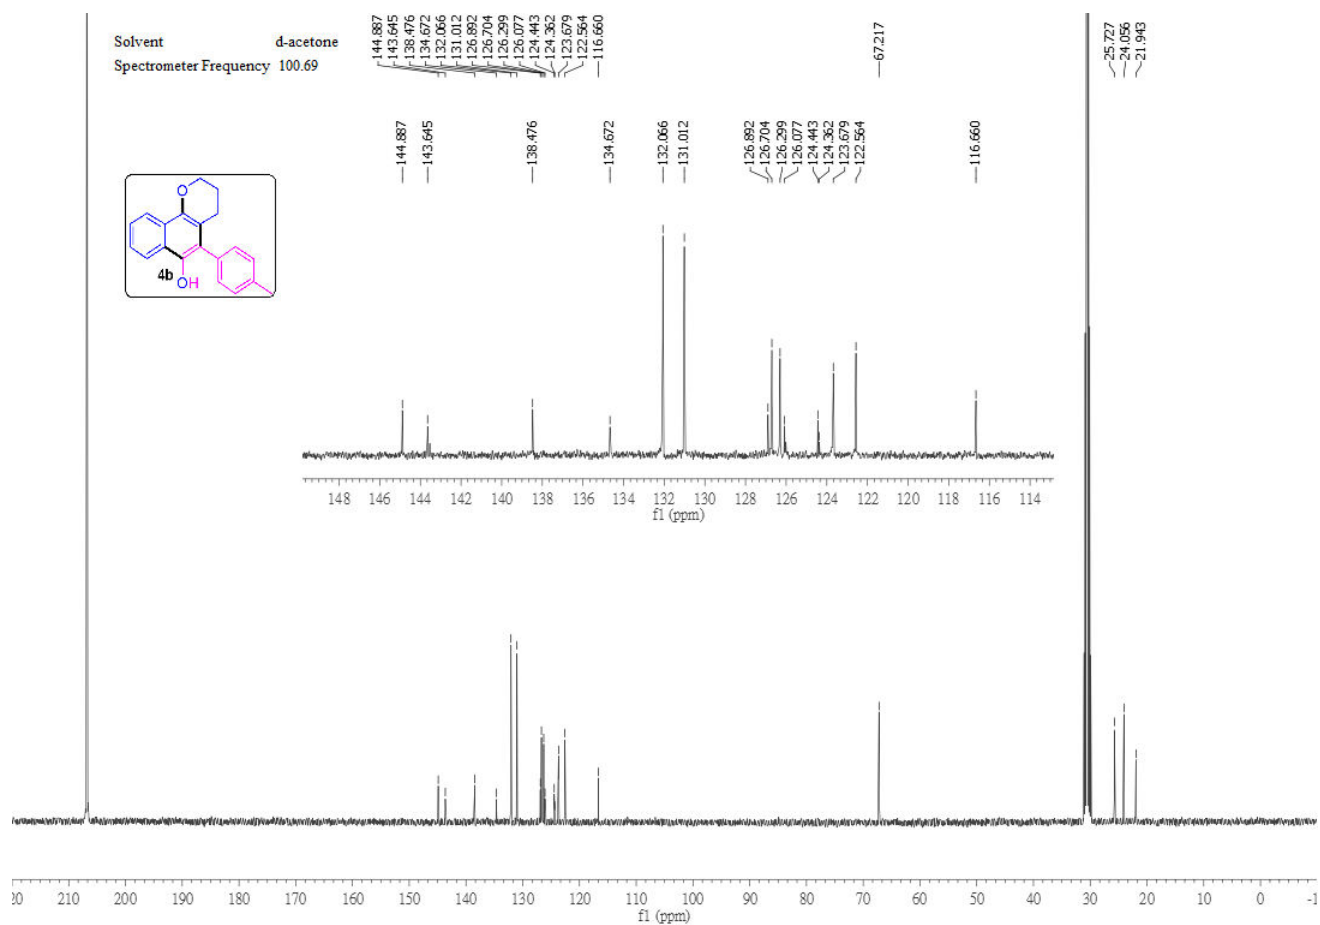



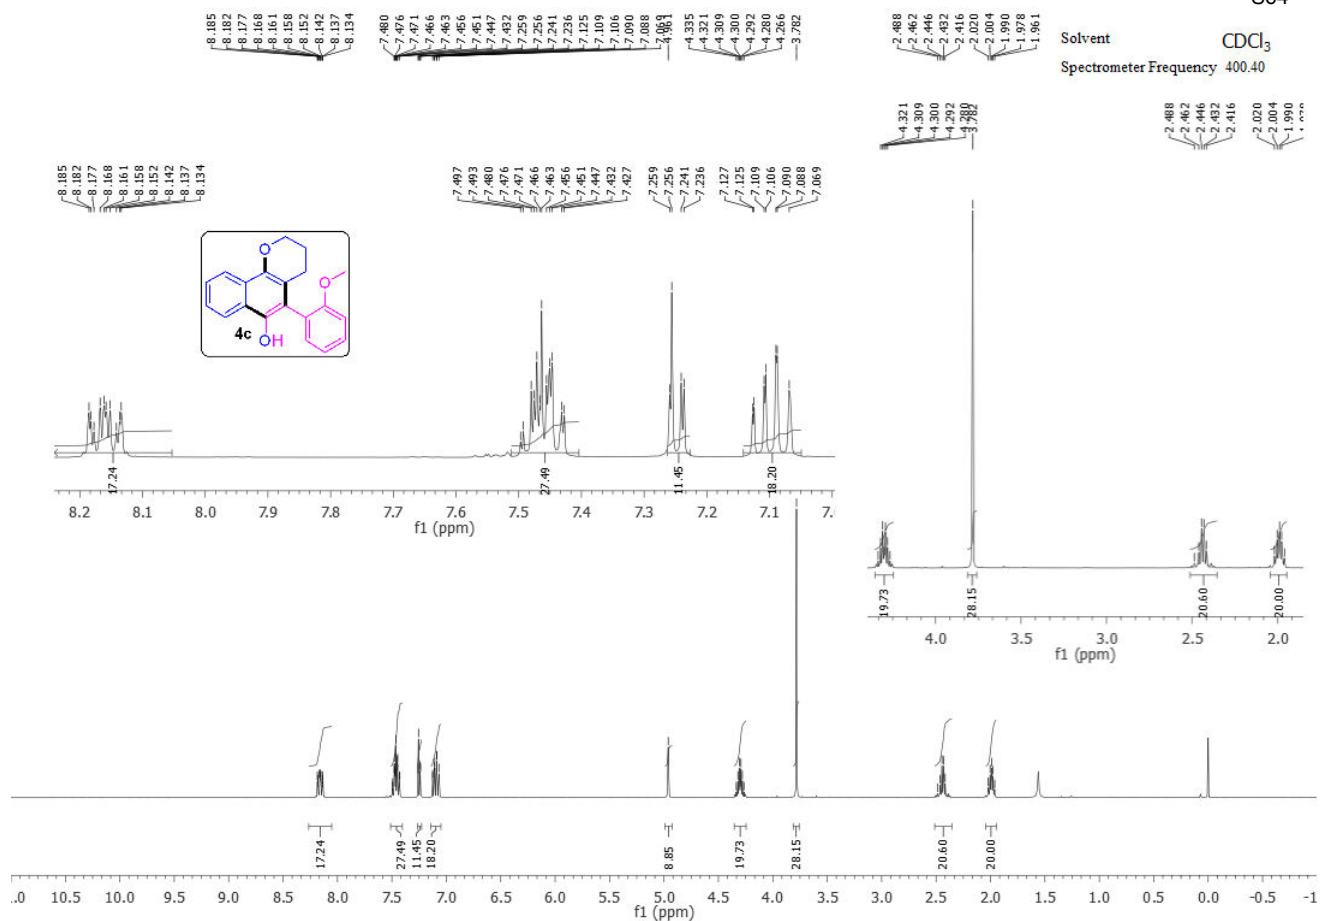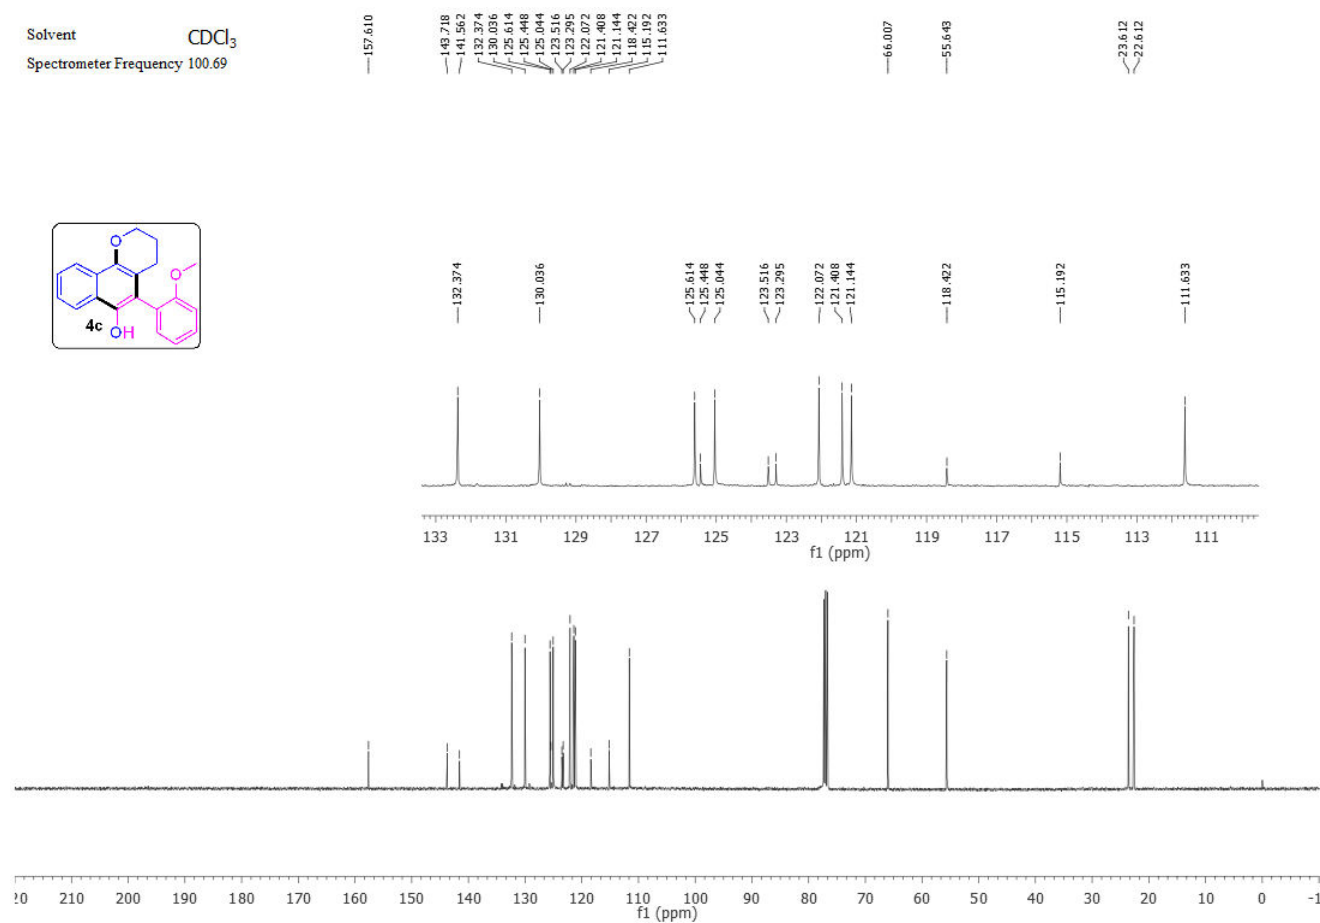



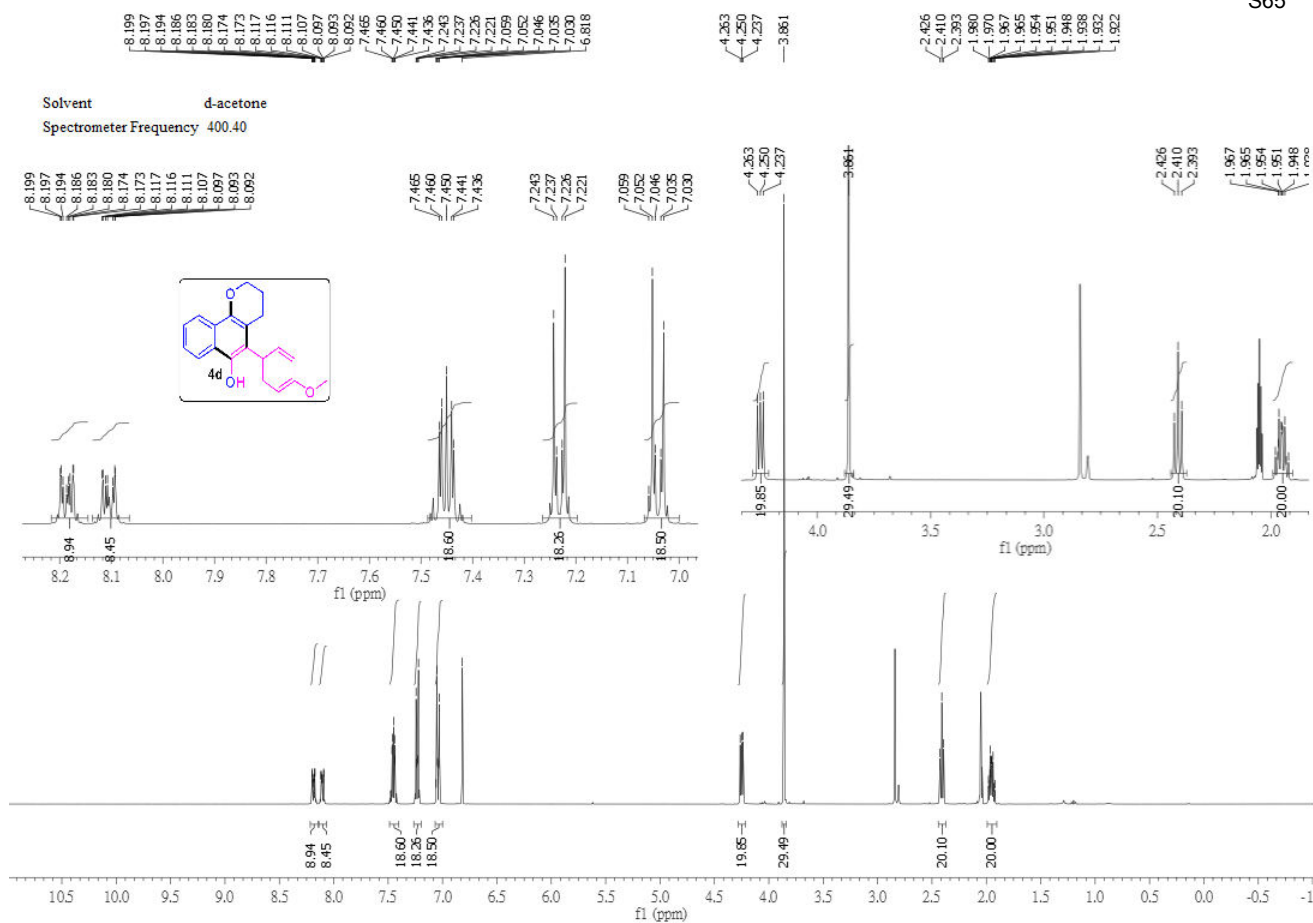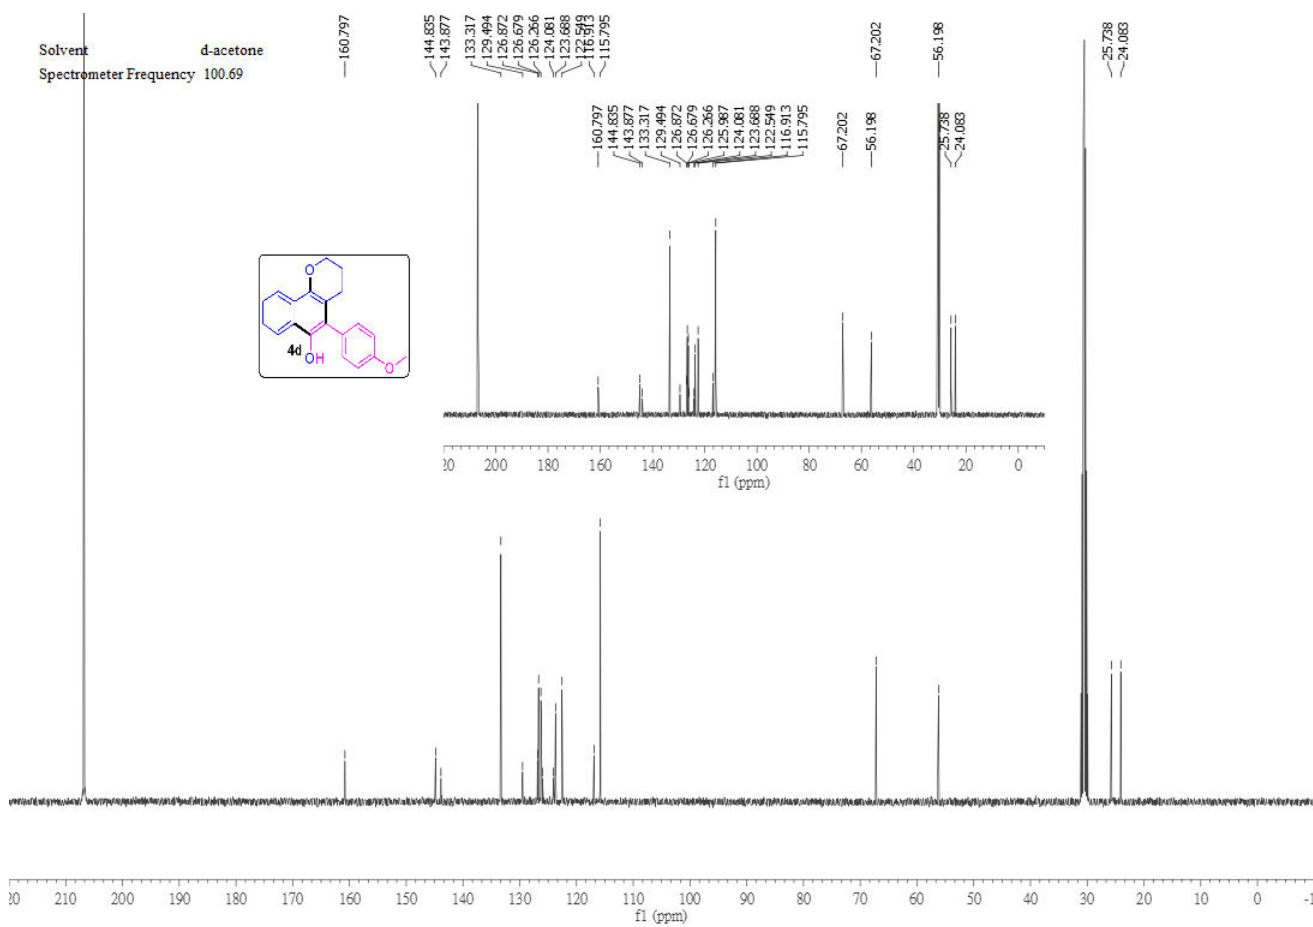



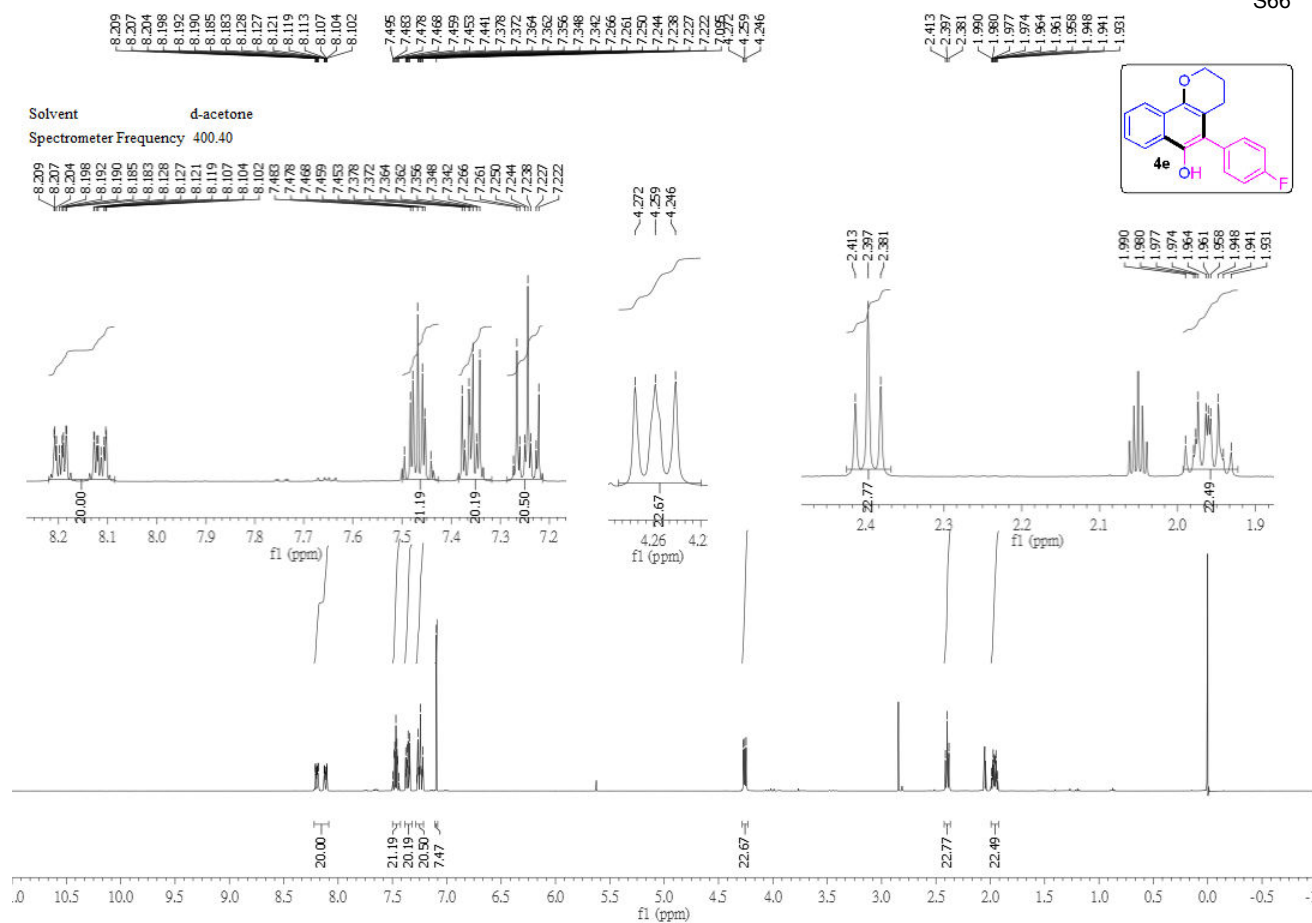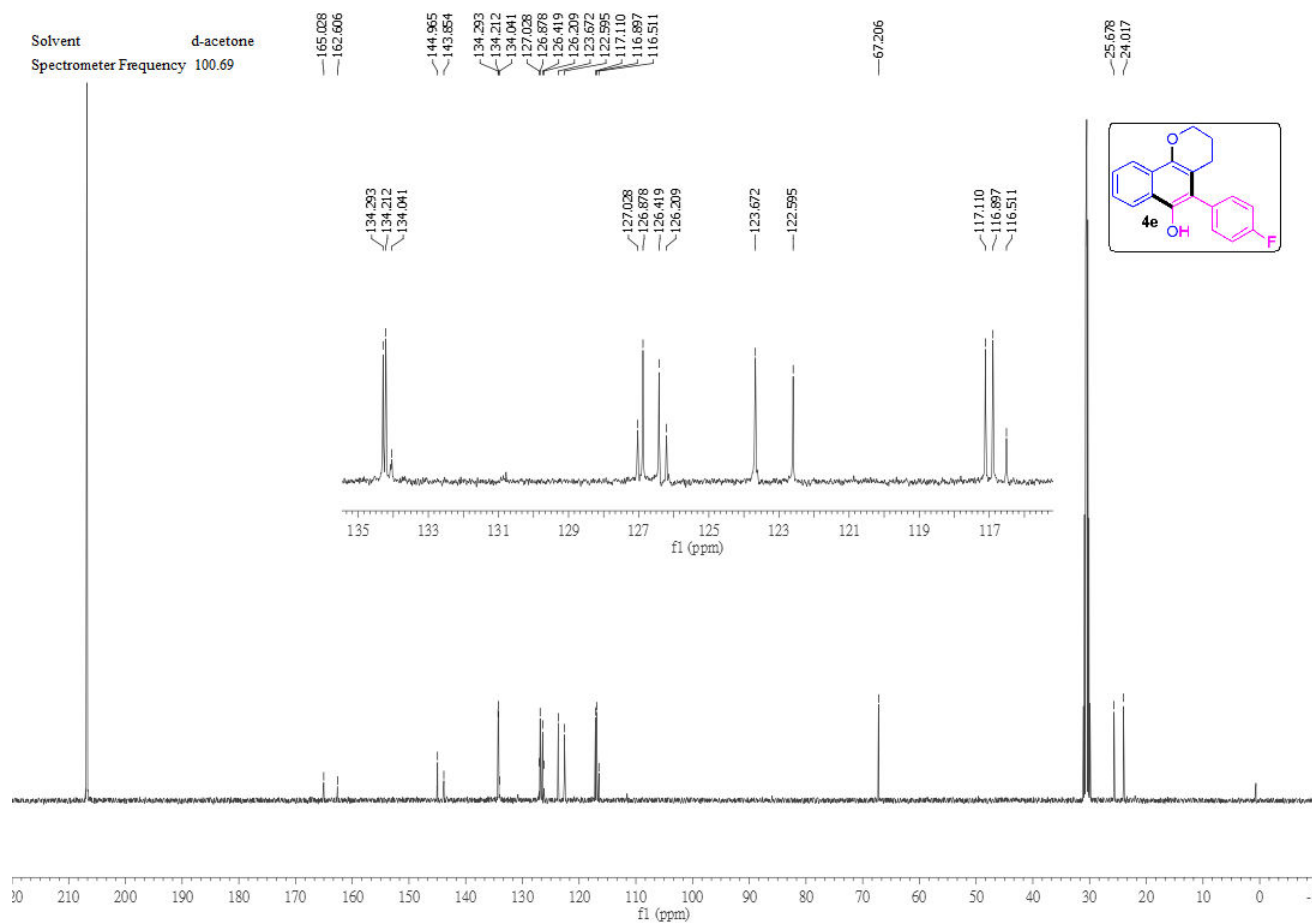



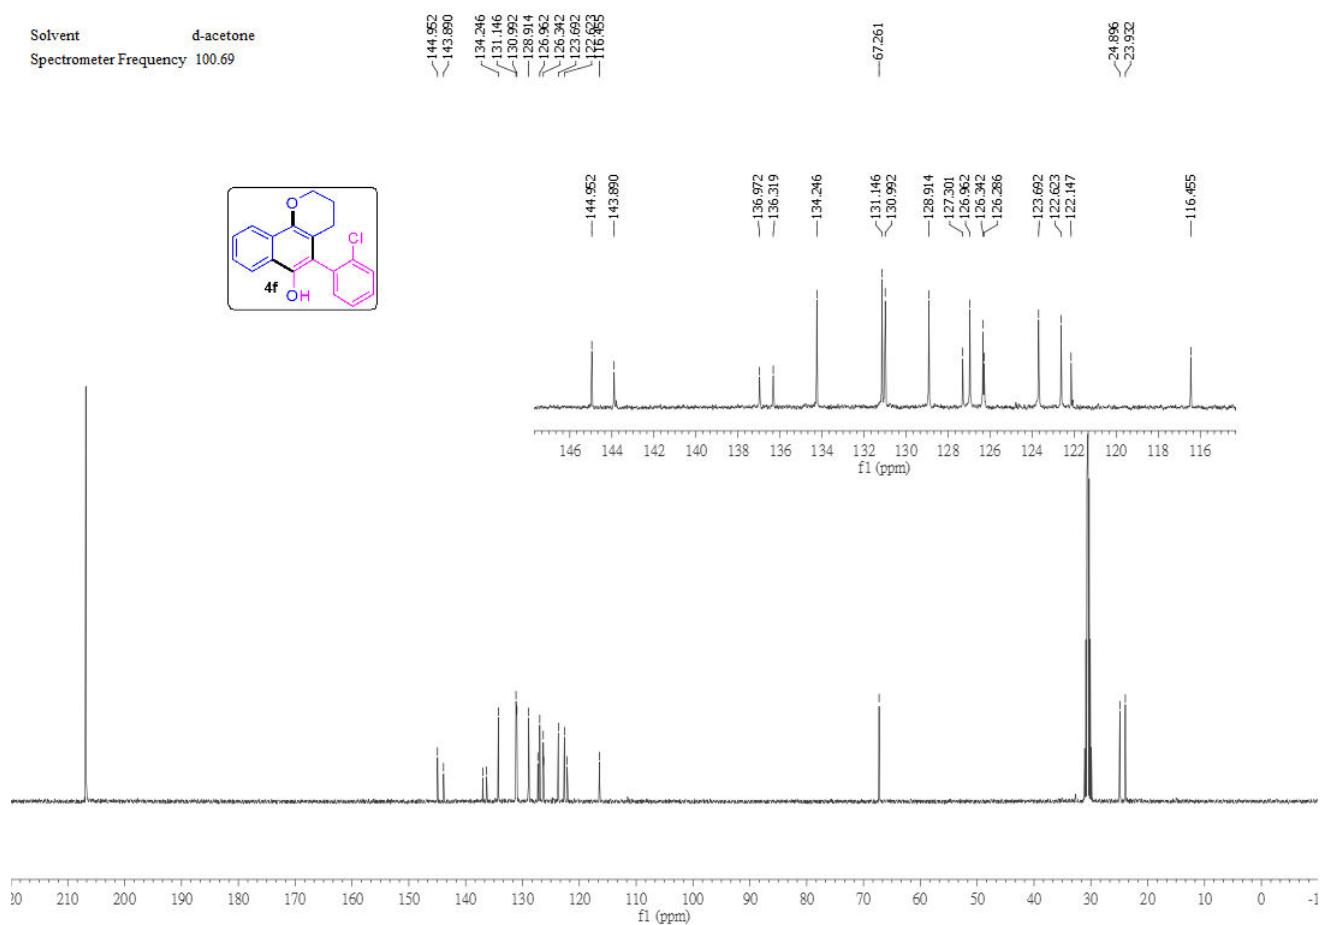



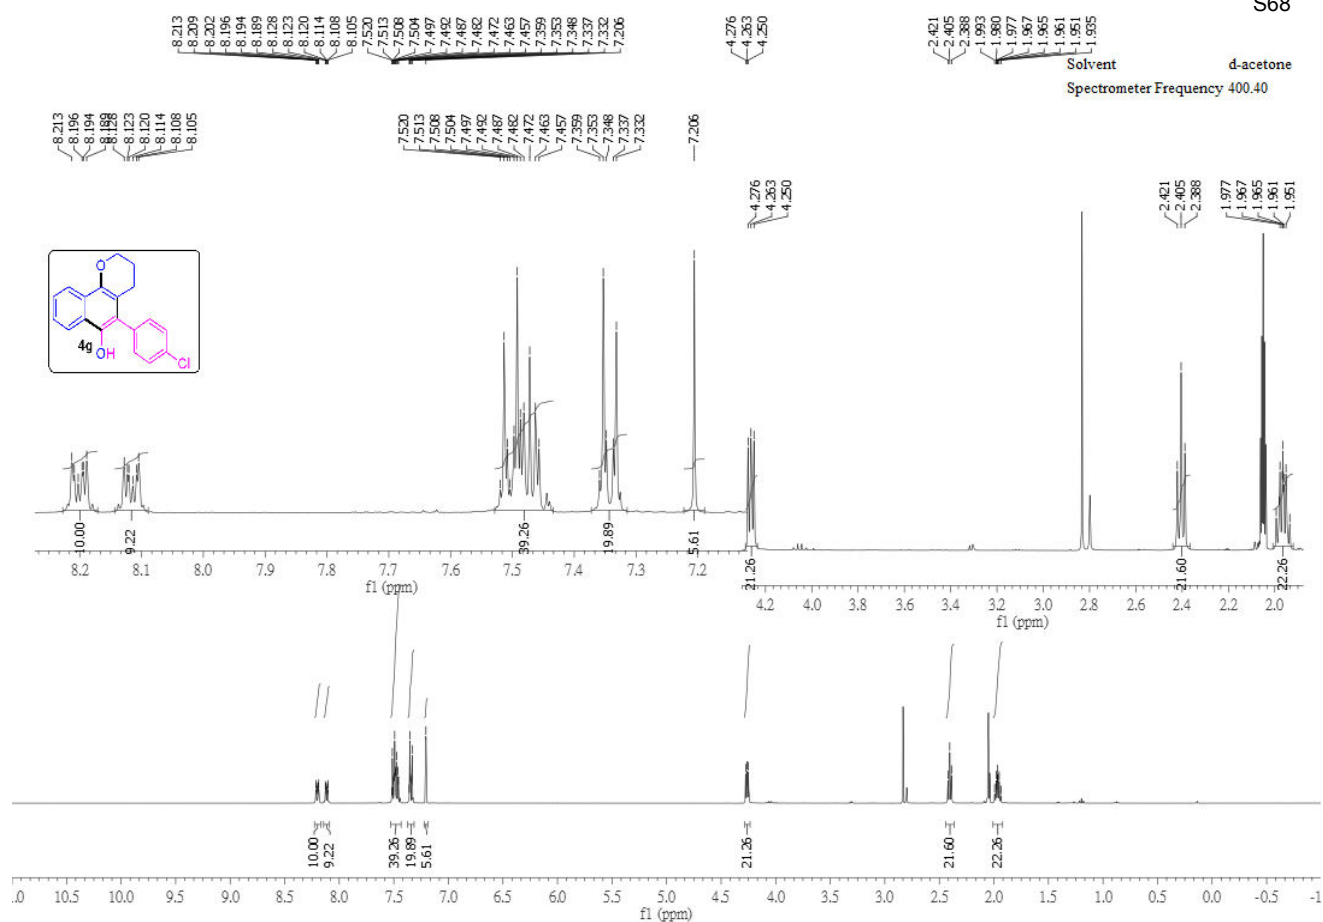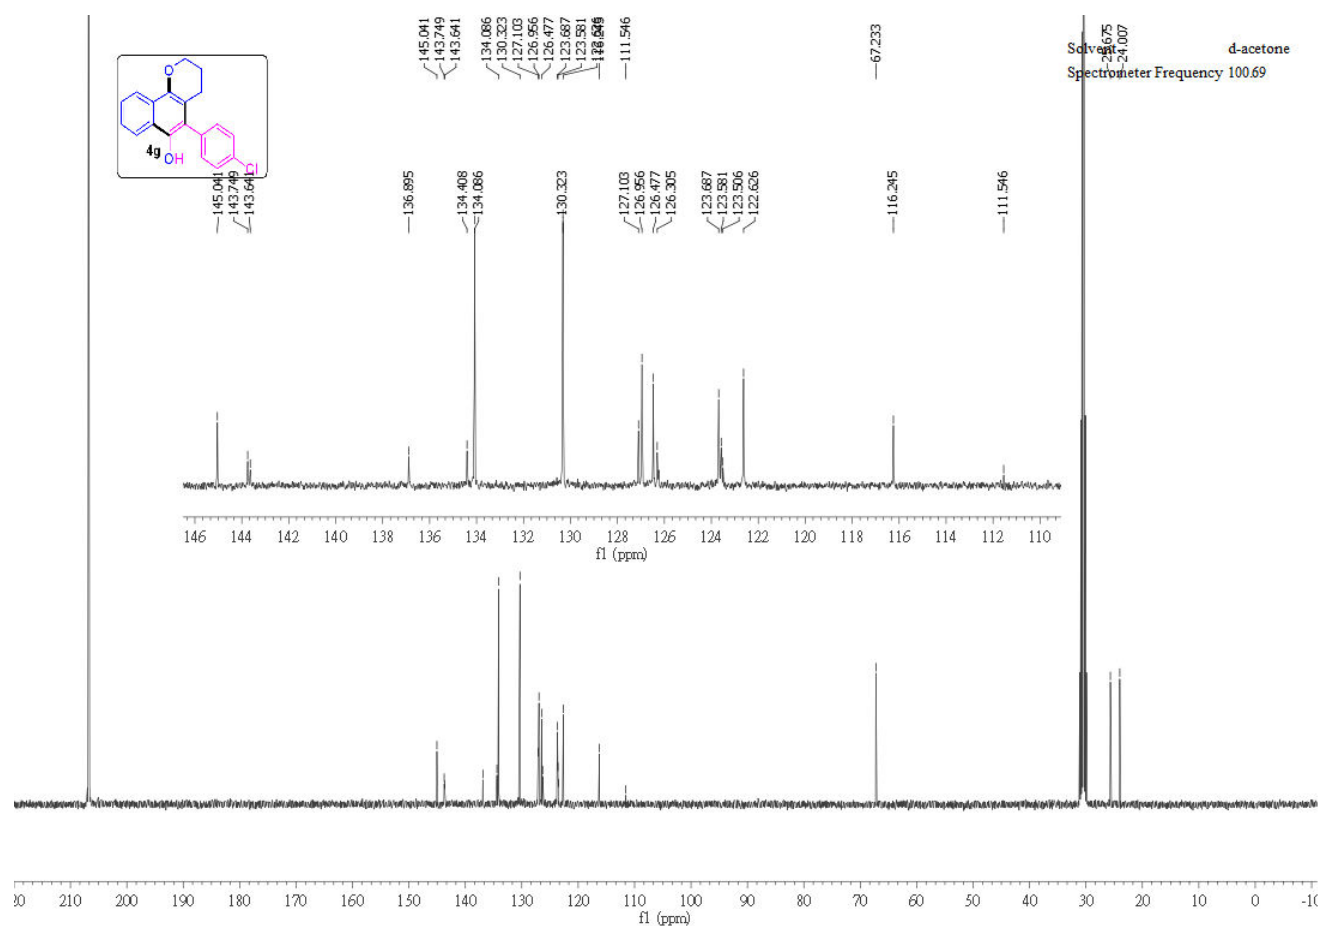



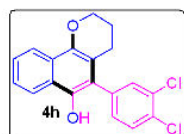

8.219  
8.216  
8.211  
8.201  
8.196  
8.193  
8.133  
8.128  
8.118  
8.113  
8.110  
7.662  
7.543  
7.538  
7.521  
7.516  
7.504  
7.499  
7.495  
7.487  
7.479  
7.472  
7.458  
7.332  
7.327  
7.311  
7.306

4.284  
4.273  
4.270  
4.259

2.452  
2.435  
2.419  
2.008  
1.992  
1.981  
1.976  
1.966  
1.949

Solvent d-acetone  
Spectrometer Frequency 400.40

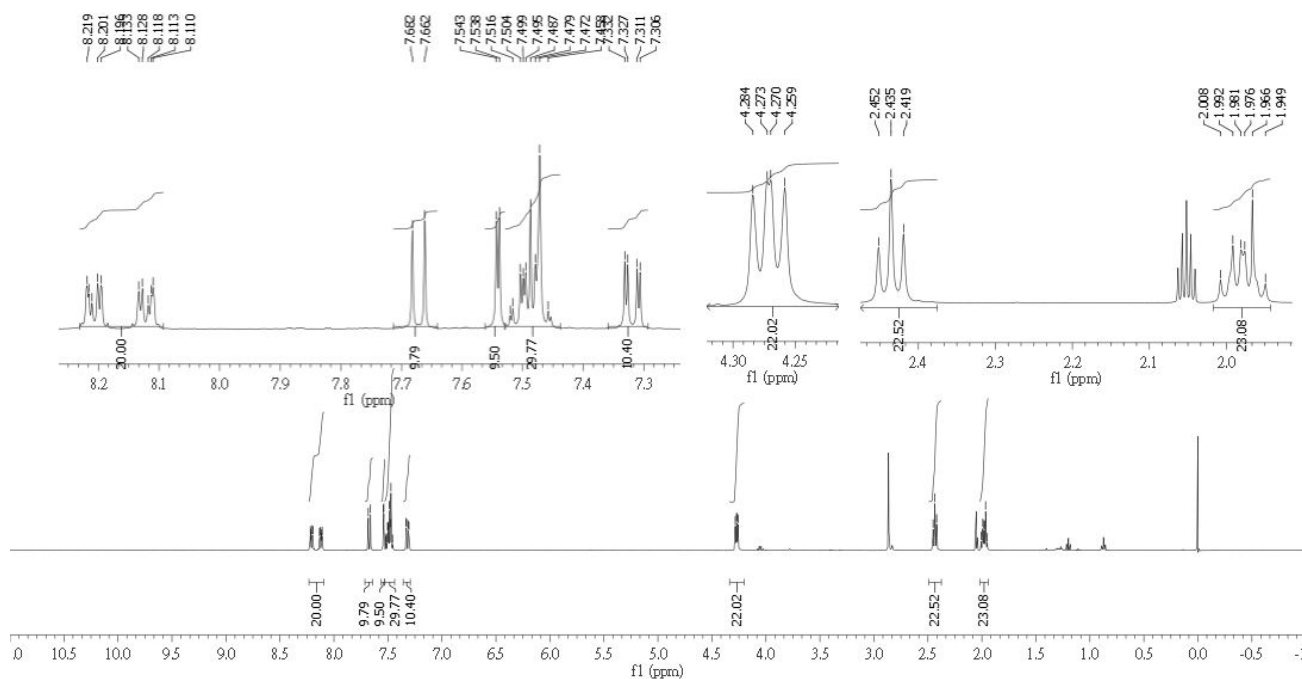

Solvent d-acetone  
Spectrometer Frequency 100.69

145.083  
143.856  
138.977  
134.374  
133.466  
132.611  
132.356  
132.305  
127.258  
127.171  
126.592  
126.343  
123.704  
122.641  
122.554  
115.929

67.235

25.600  
23.942

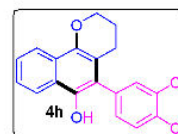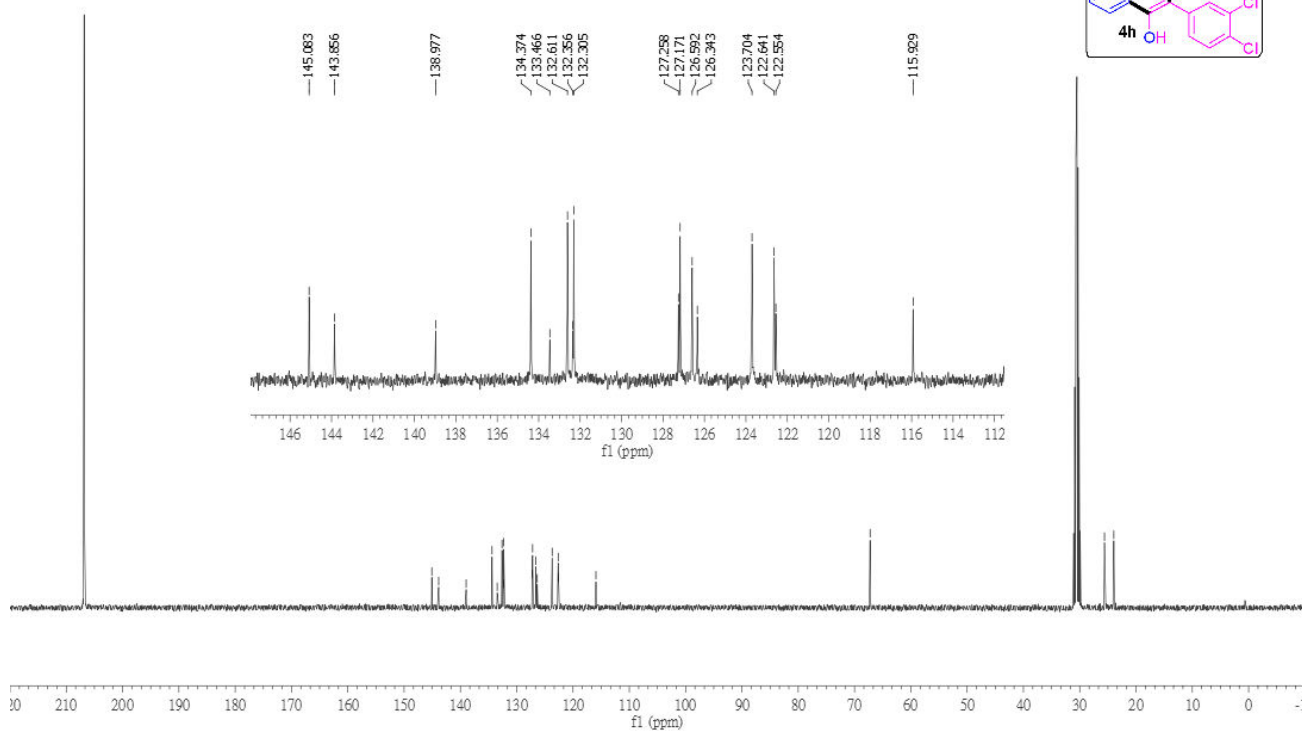



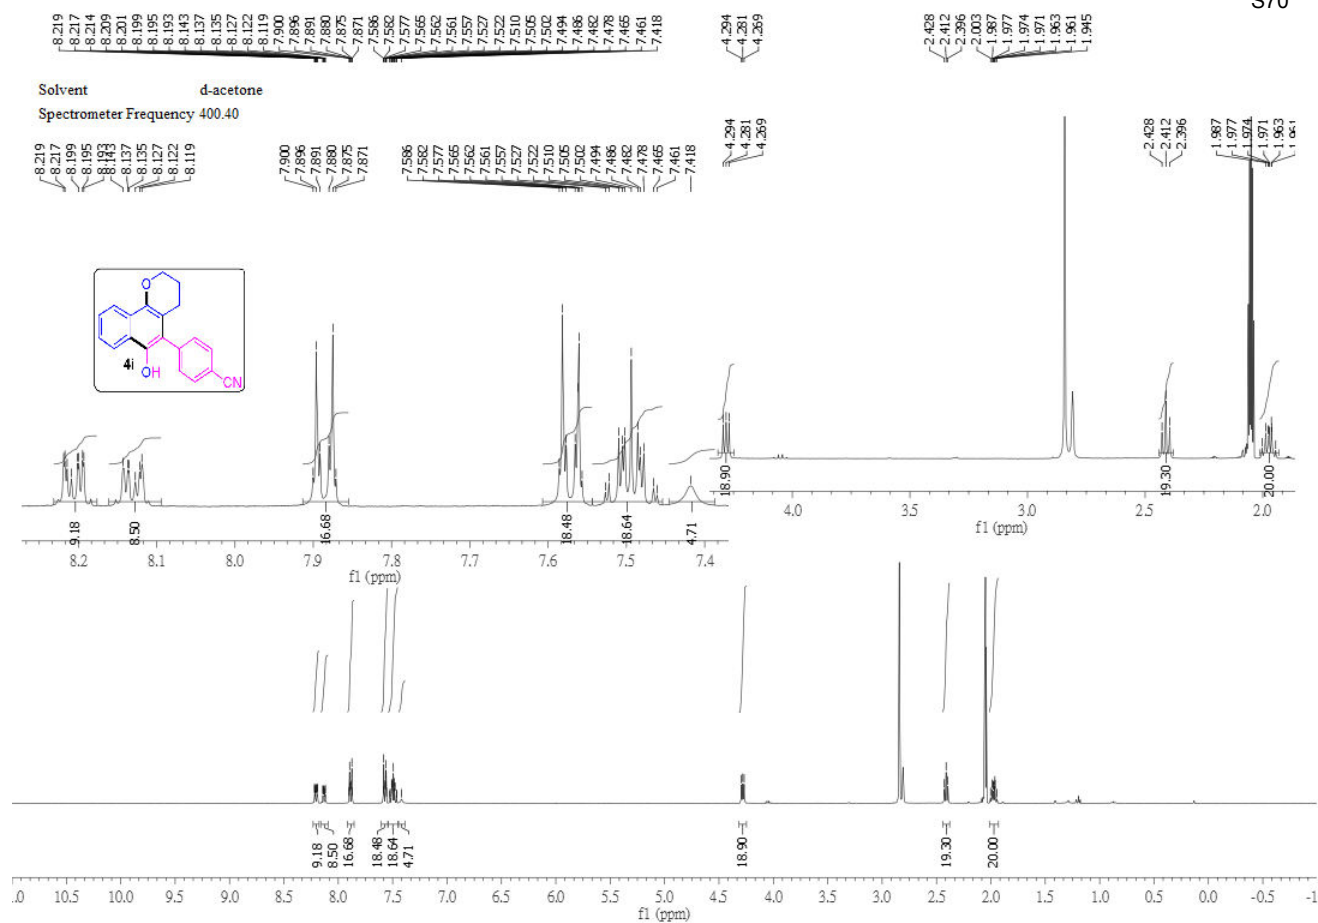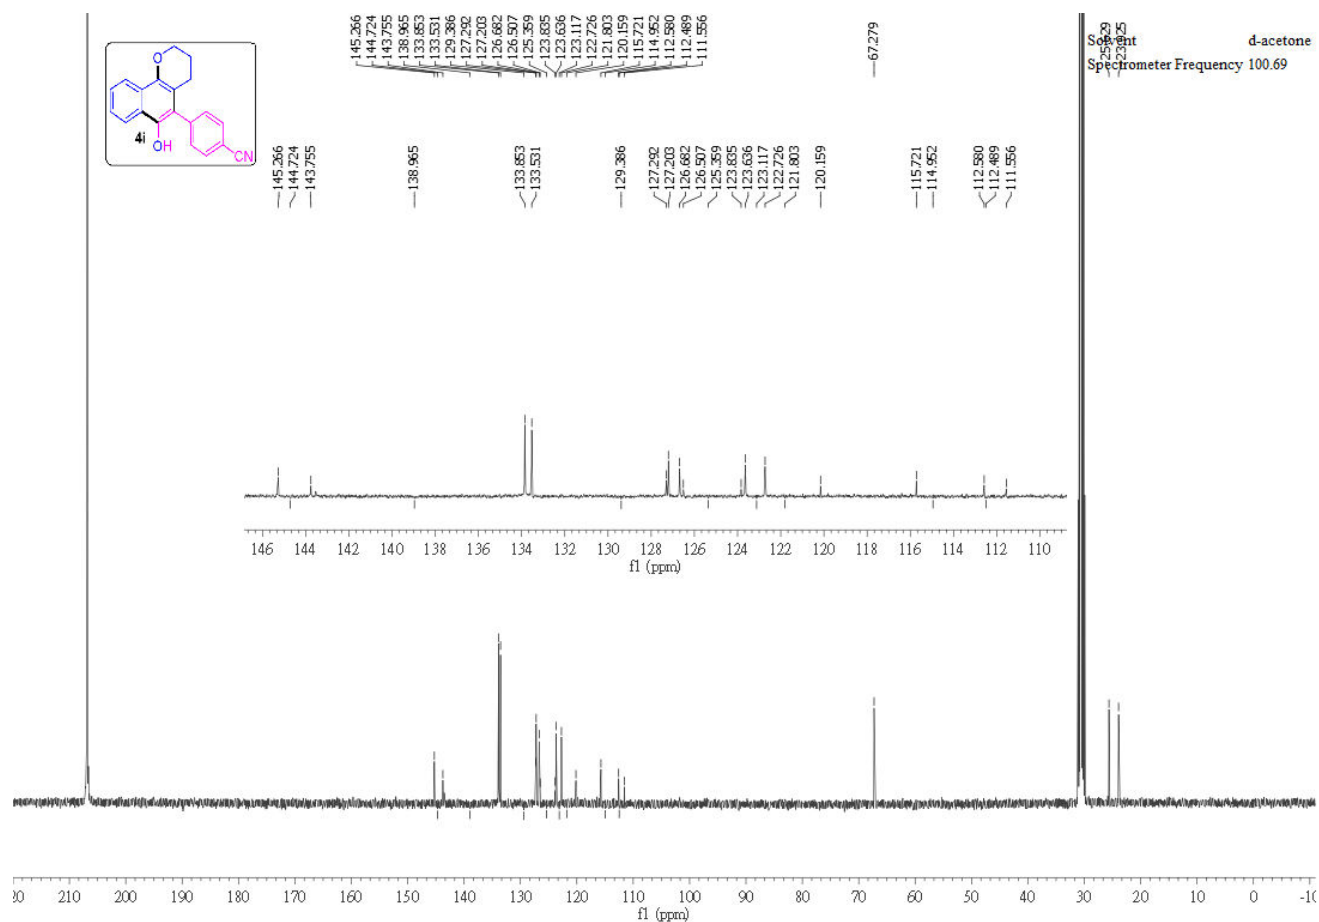



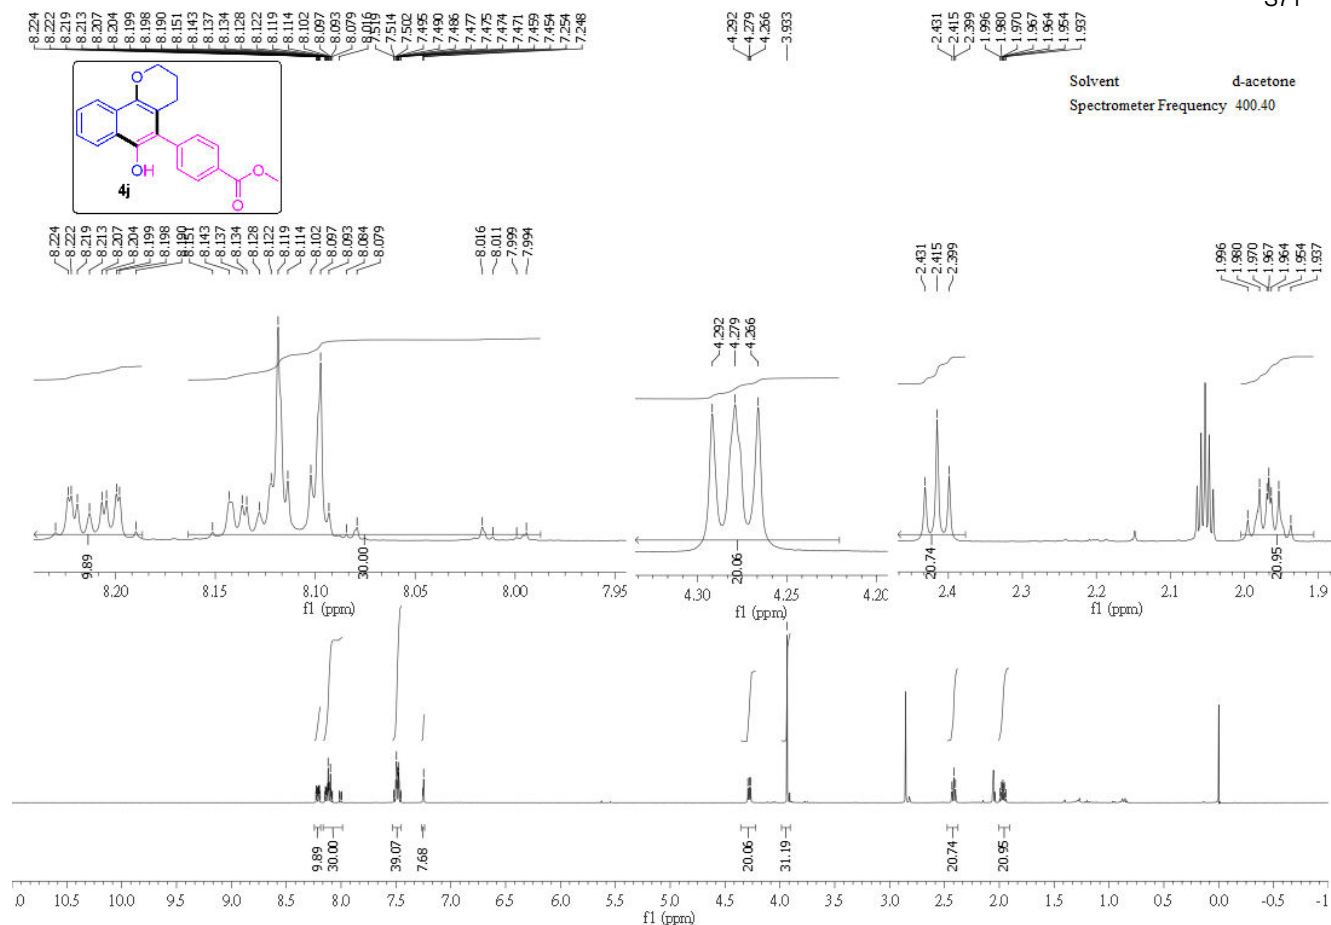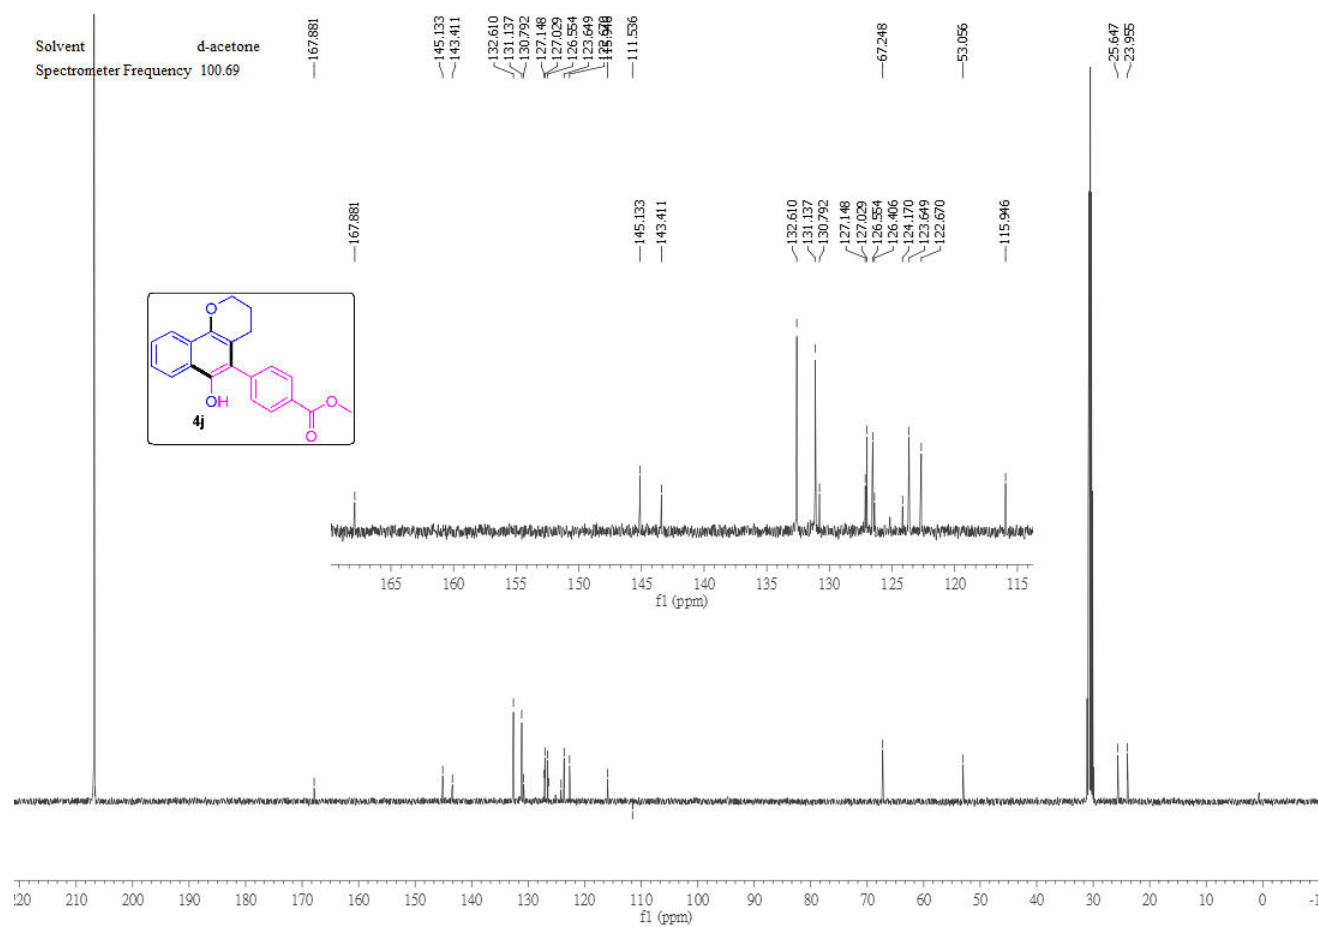



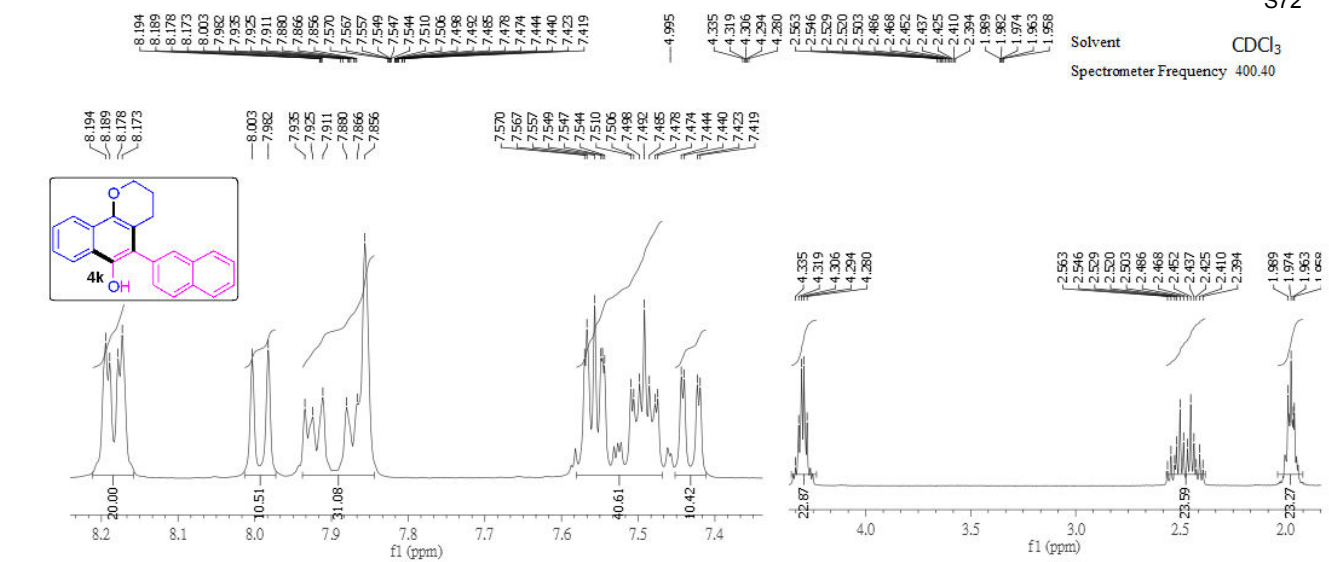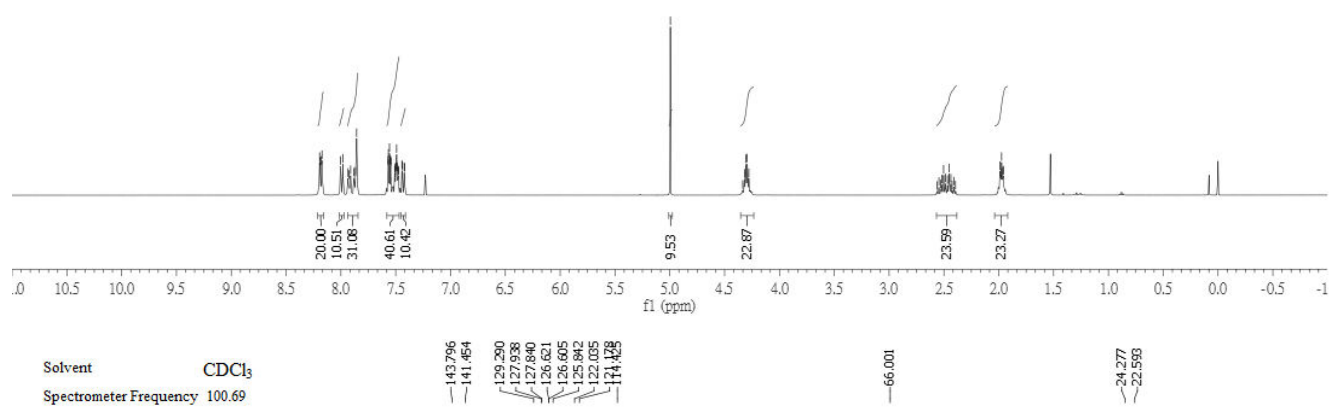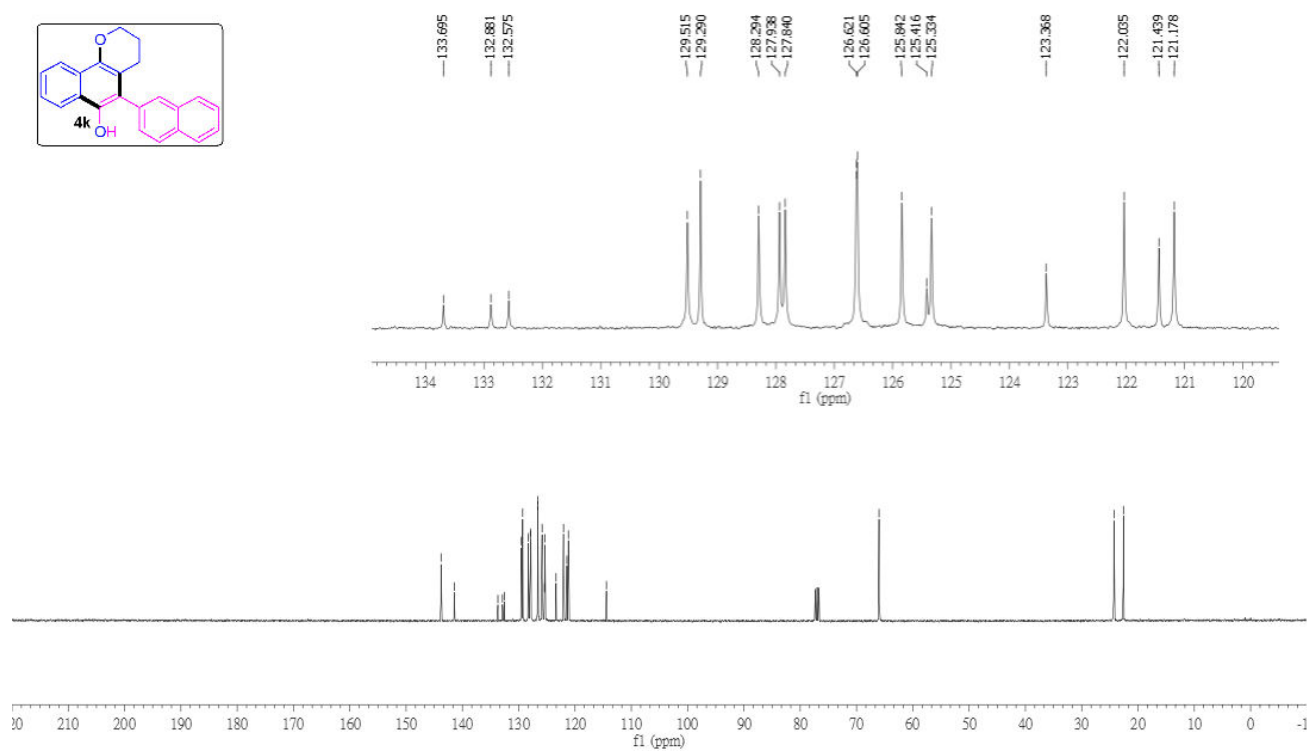



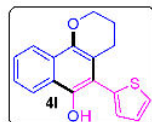

8.183  
8.164  
8.160  
8.153  
8.149  
8.130  
7.549  
7.547  
7.536  
7.534  
7.527  
7.513  
7.510  
7.493  
7.489  
7.472  
7.251  
7.223  
7.223  
7.219  
7.210  
7.086  
7.083

4.306  
4.283  
4.280

2.619  
2.603  
2.587  
2.560  
2.084  
2.021  
2.008  
1.992

Solvent  $\text{CDCl}_3$   
Spectrometer Frequency 400.40

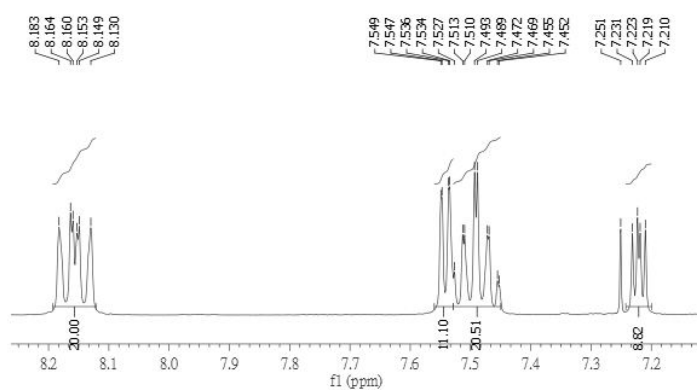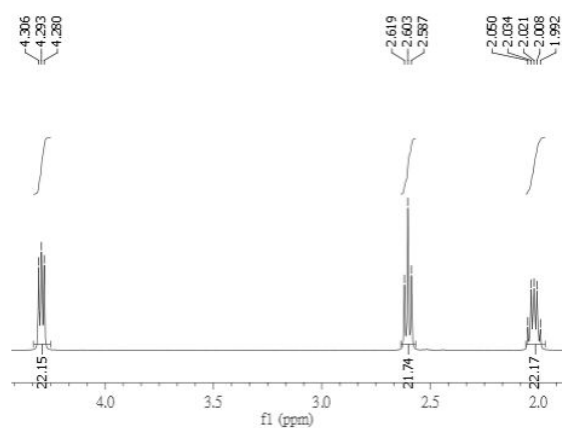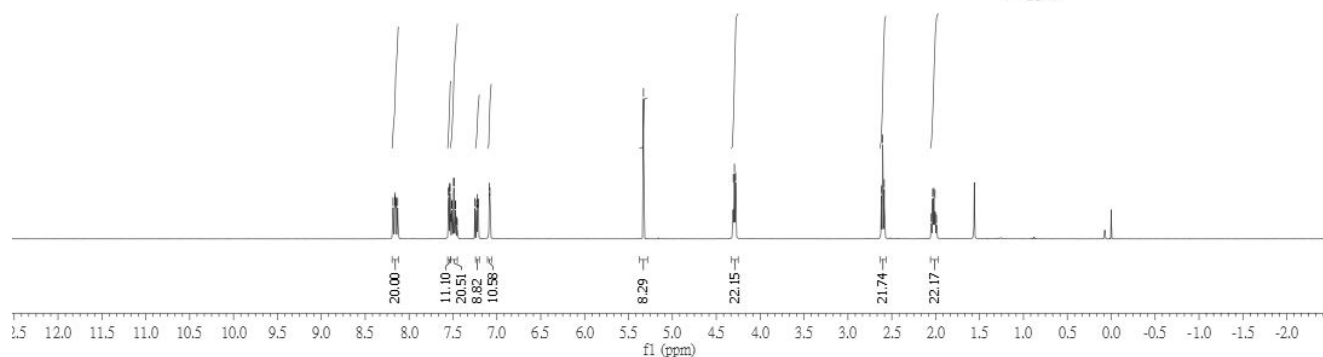

Solvent  $\text{CDCl}_3$   
Spectrometer Frequency 100.69

143.653  
143.445

128.996  
127.997  
127.918

126.386  
125.420

122.270  
121.191

115.117  
113.370

65.978

24.004  
22.561

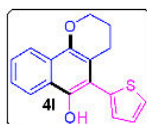

128.996

127.997  
127.918

126.386

125.420

122.270

121.191

115.117

113.370

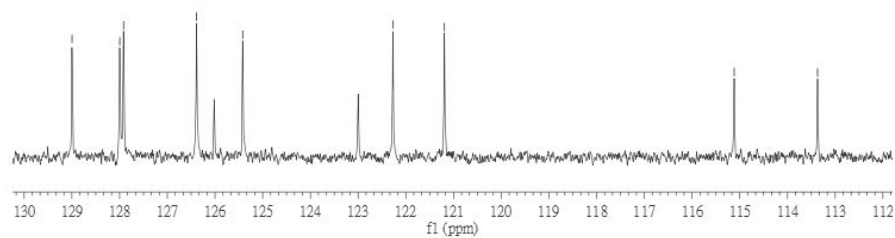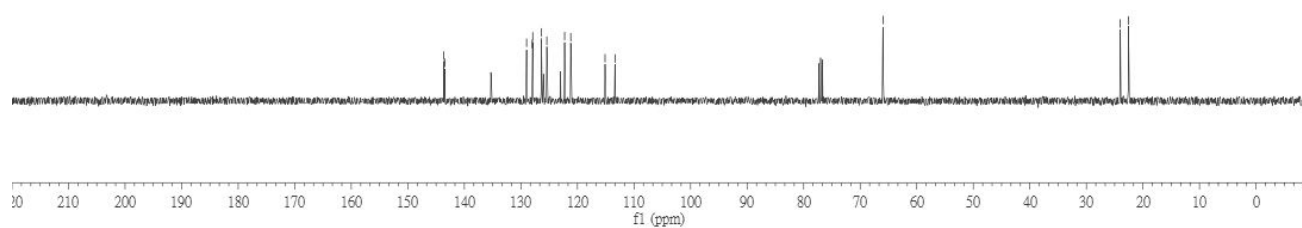



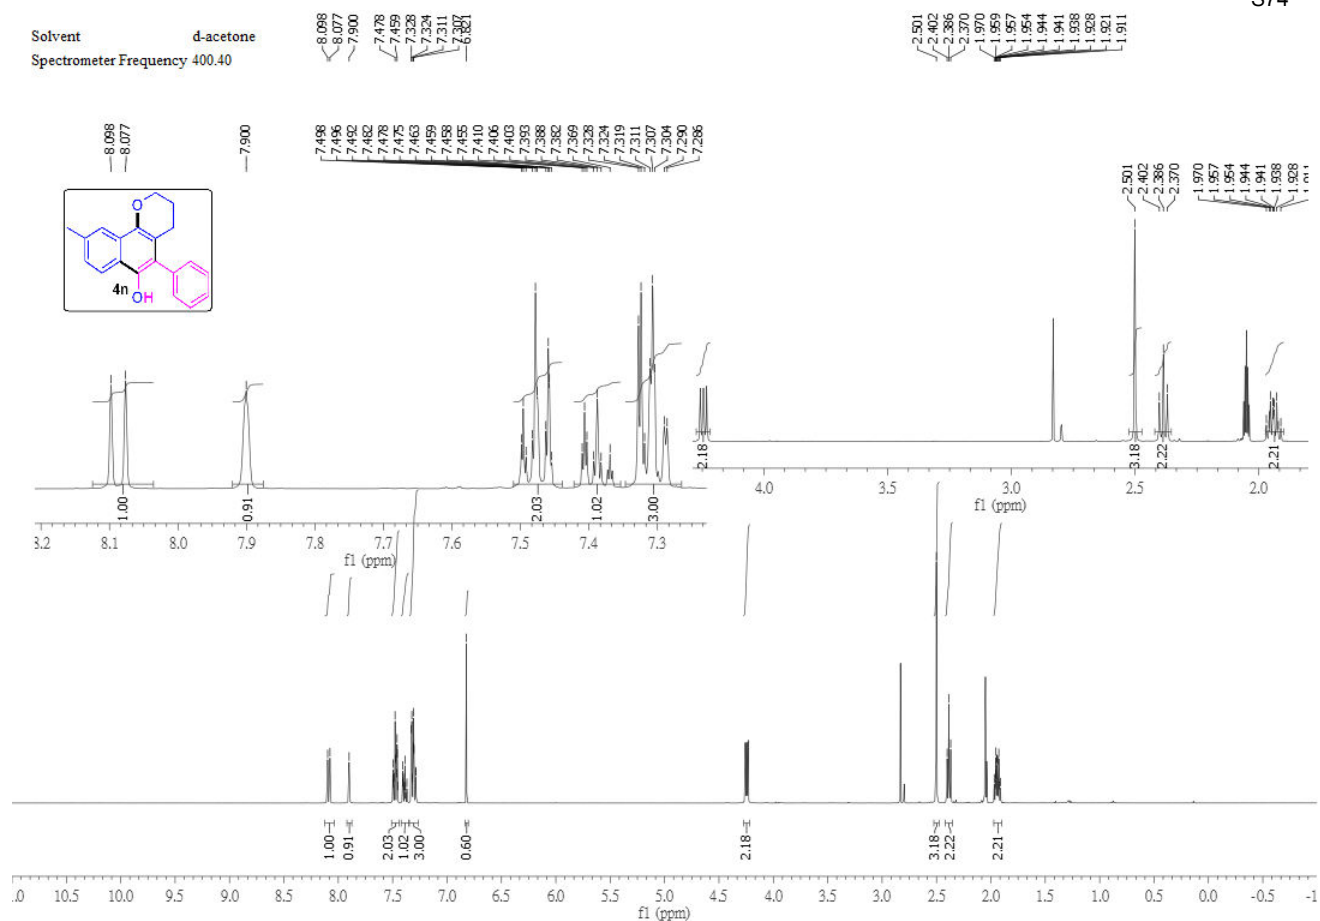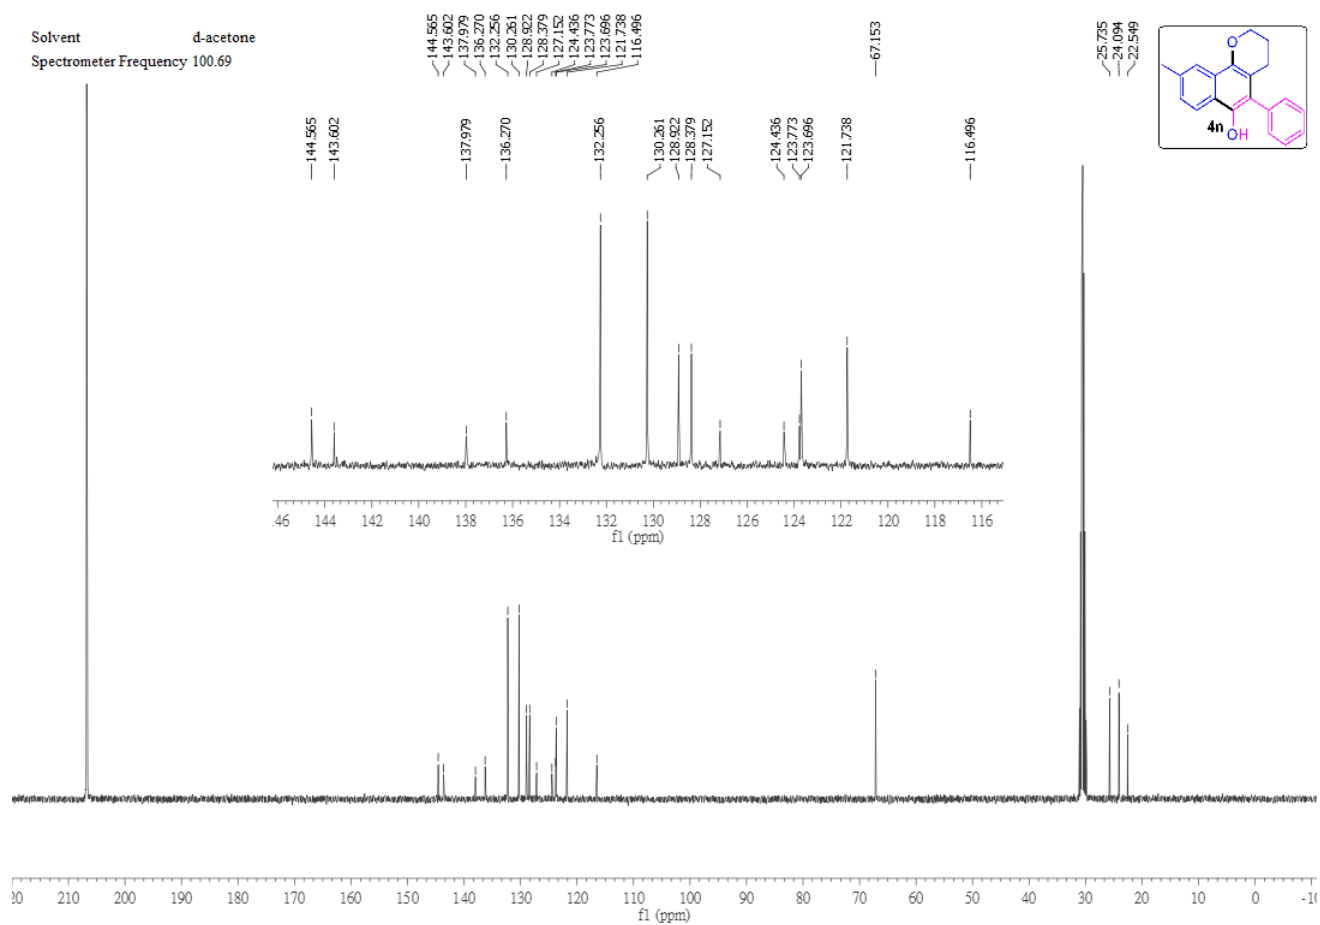



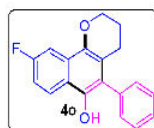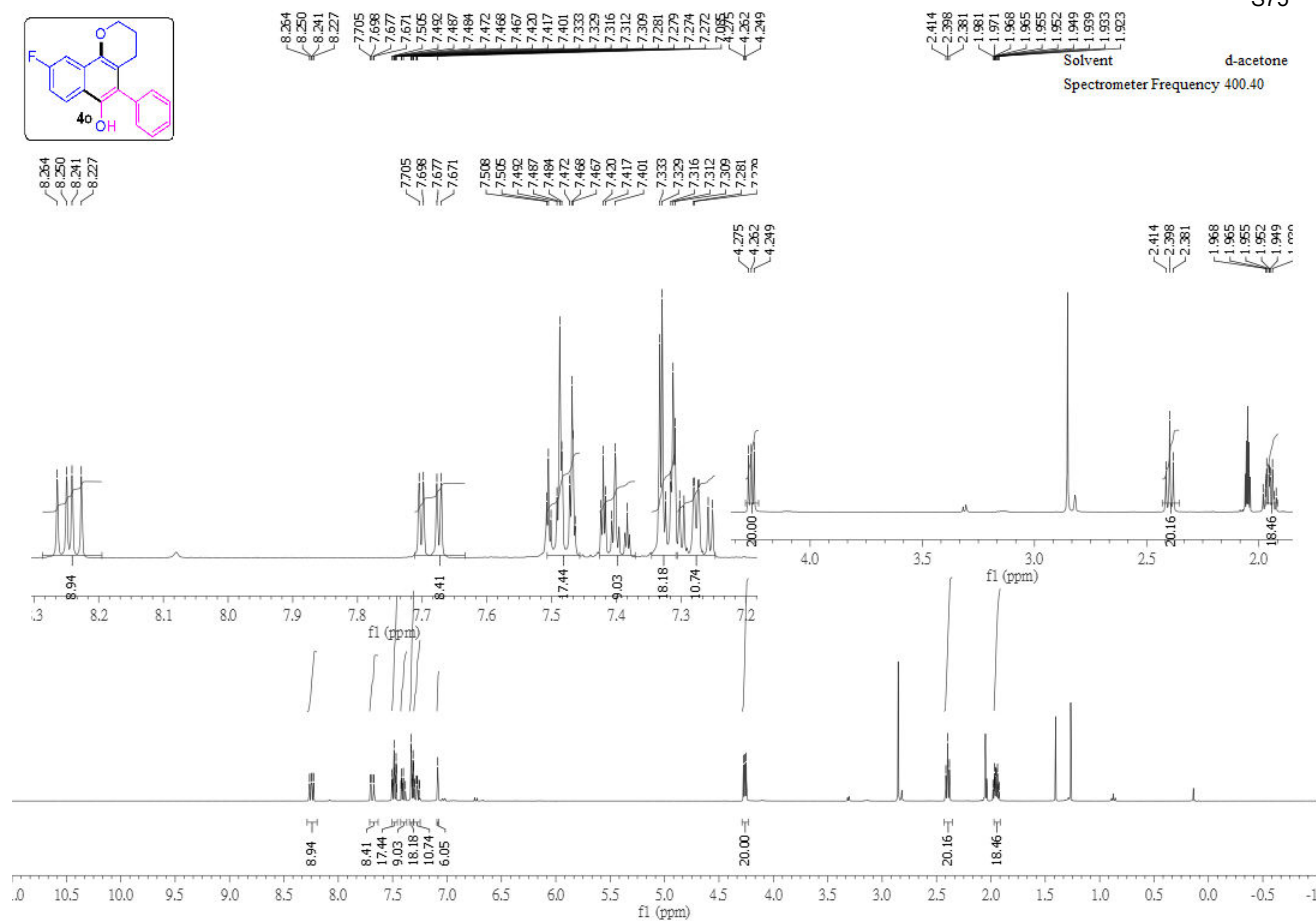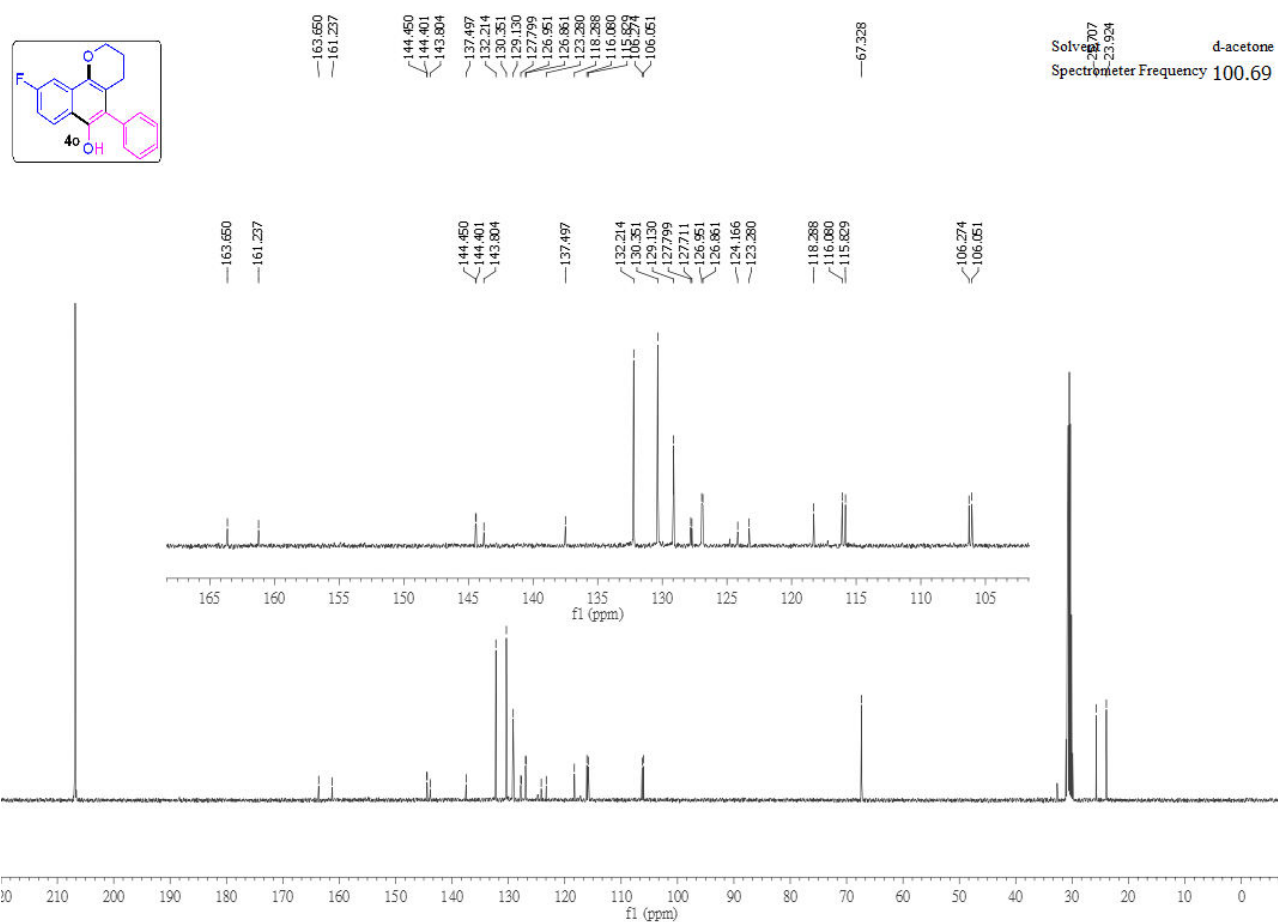



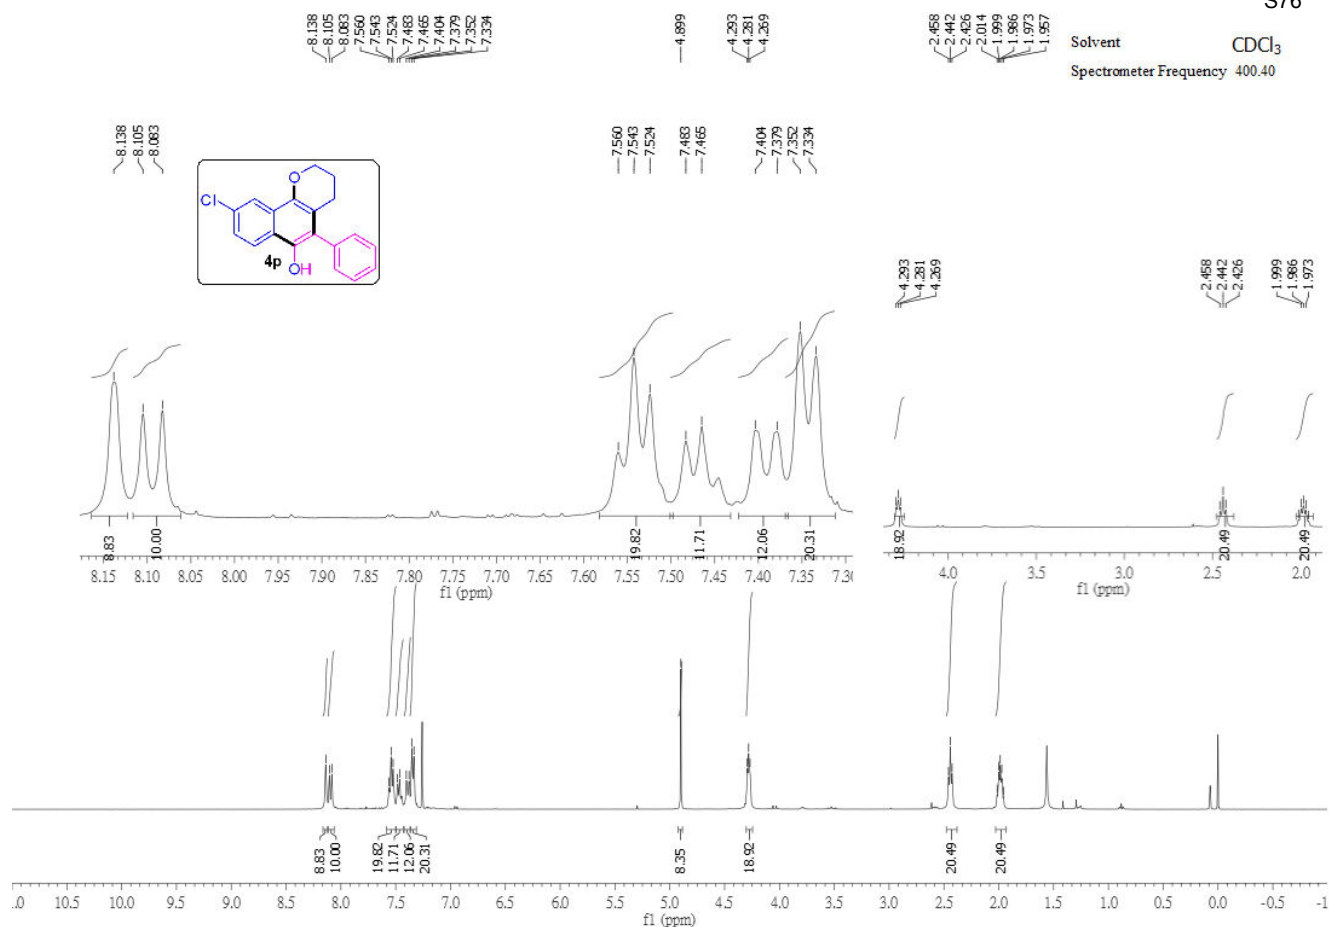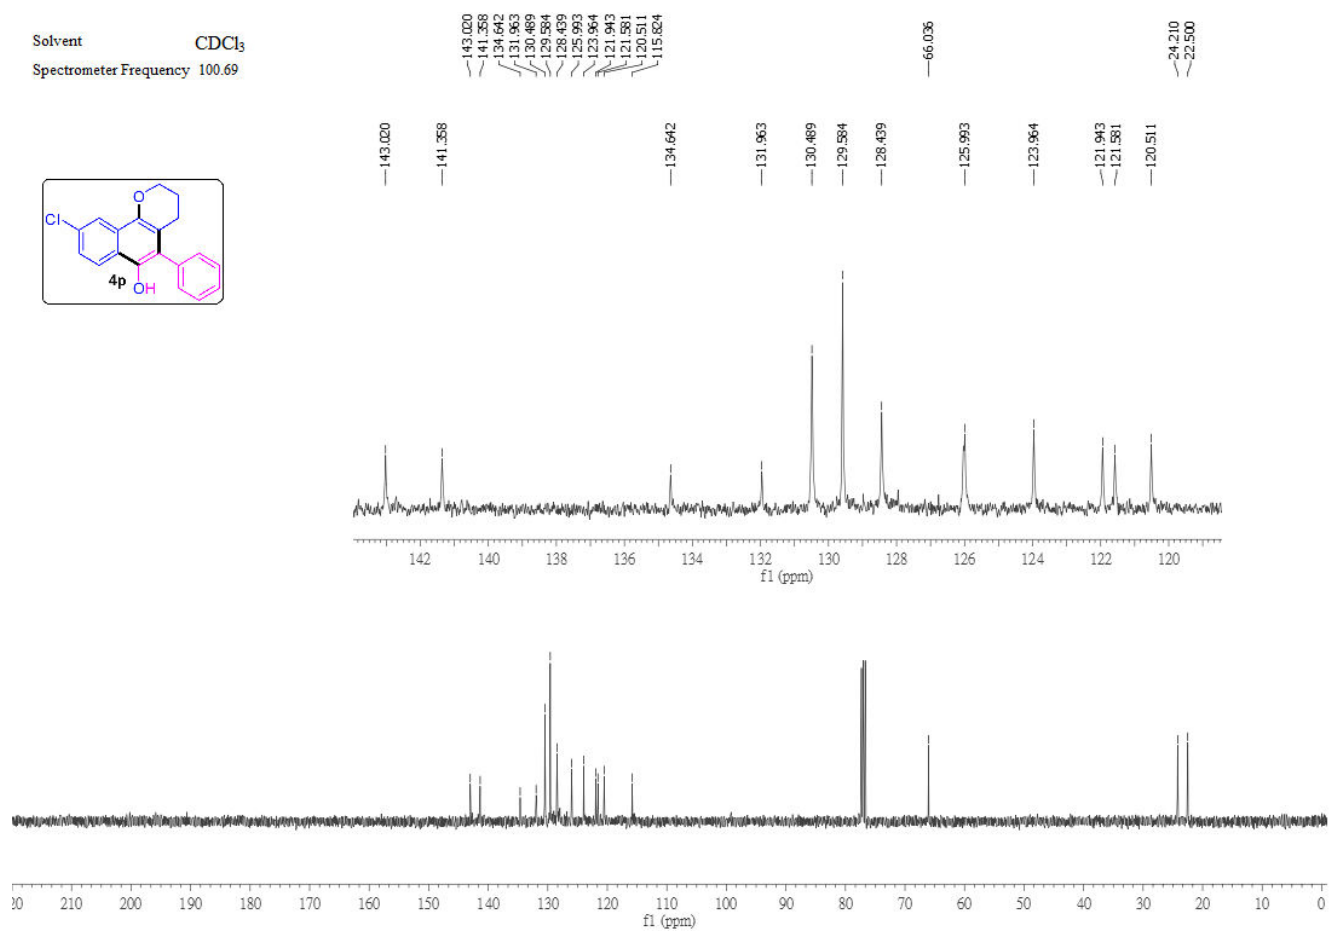



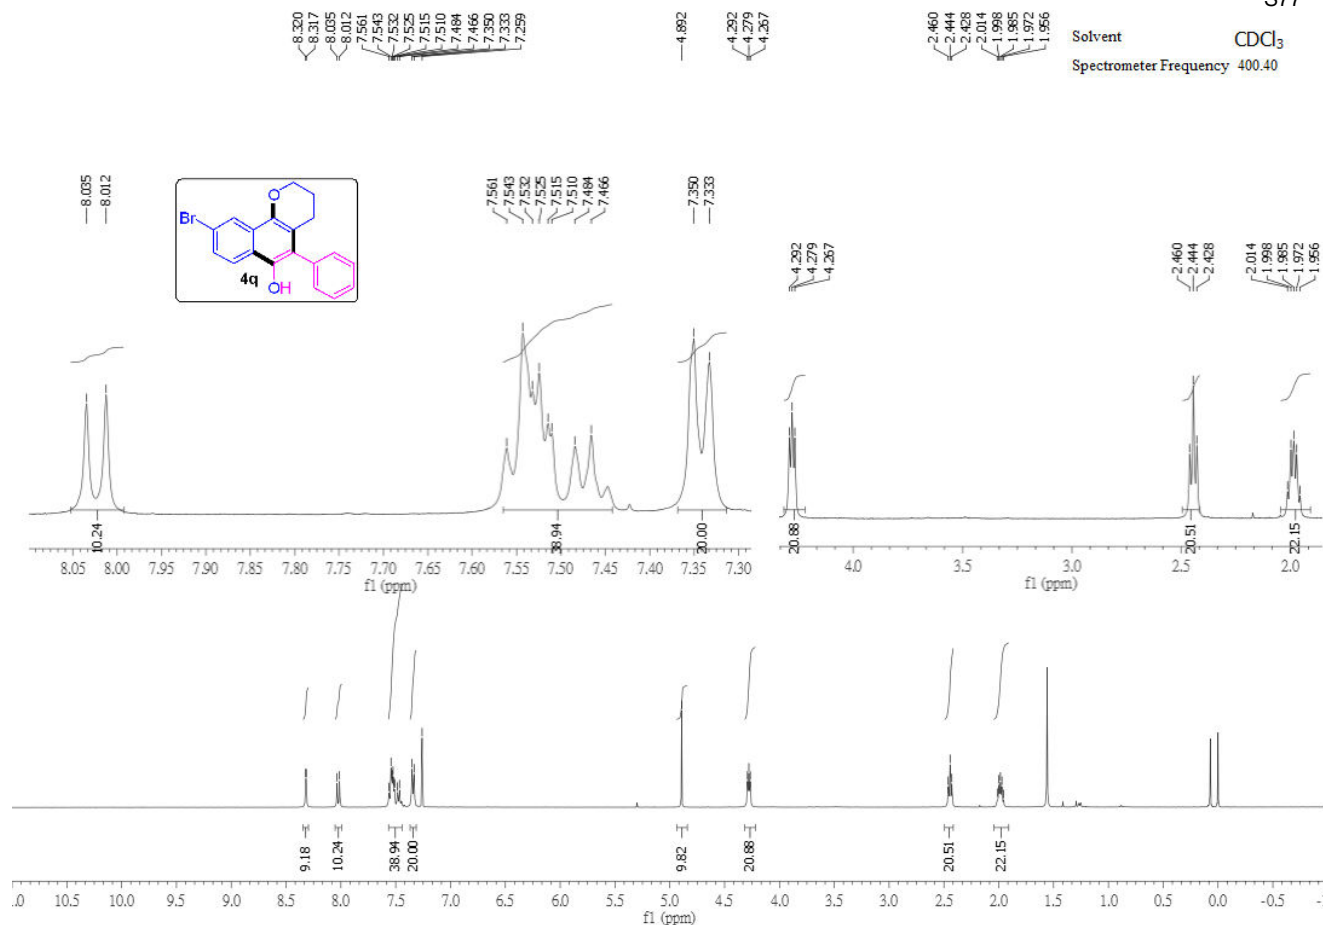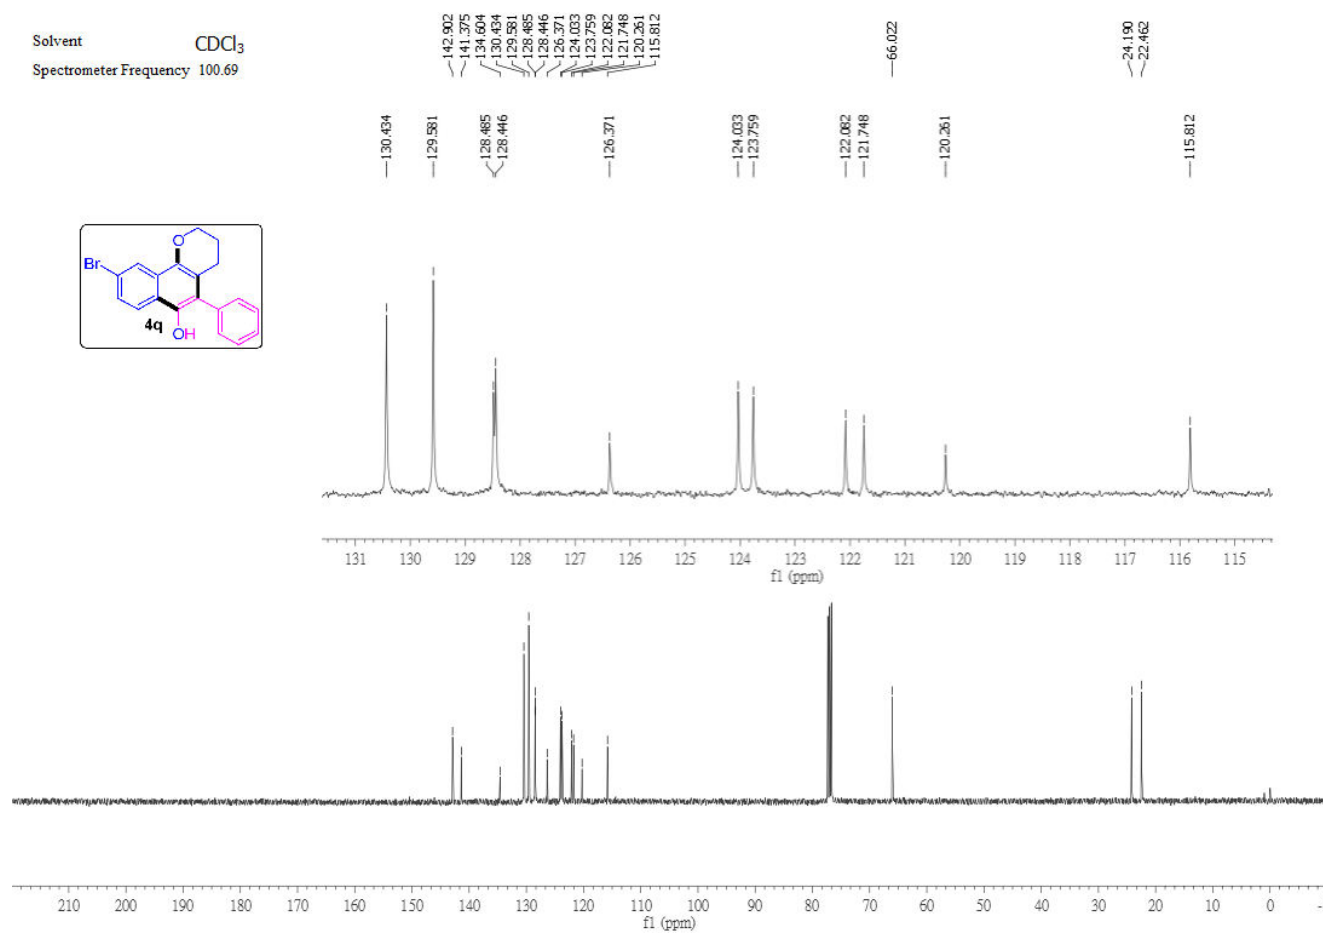



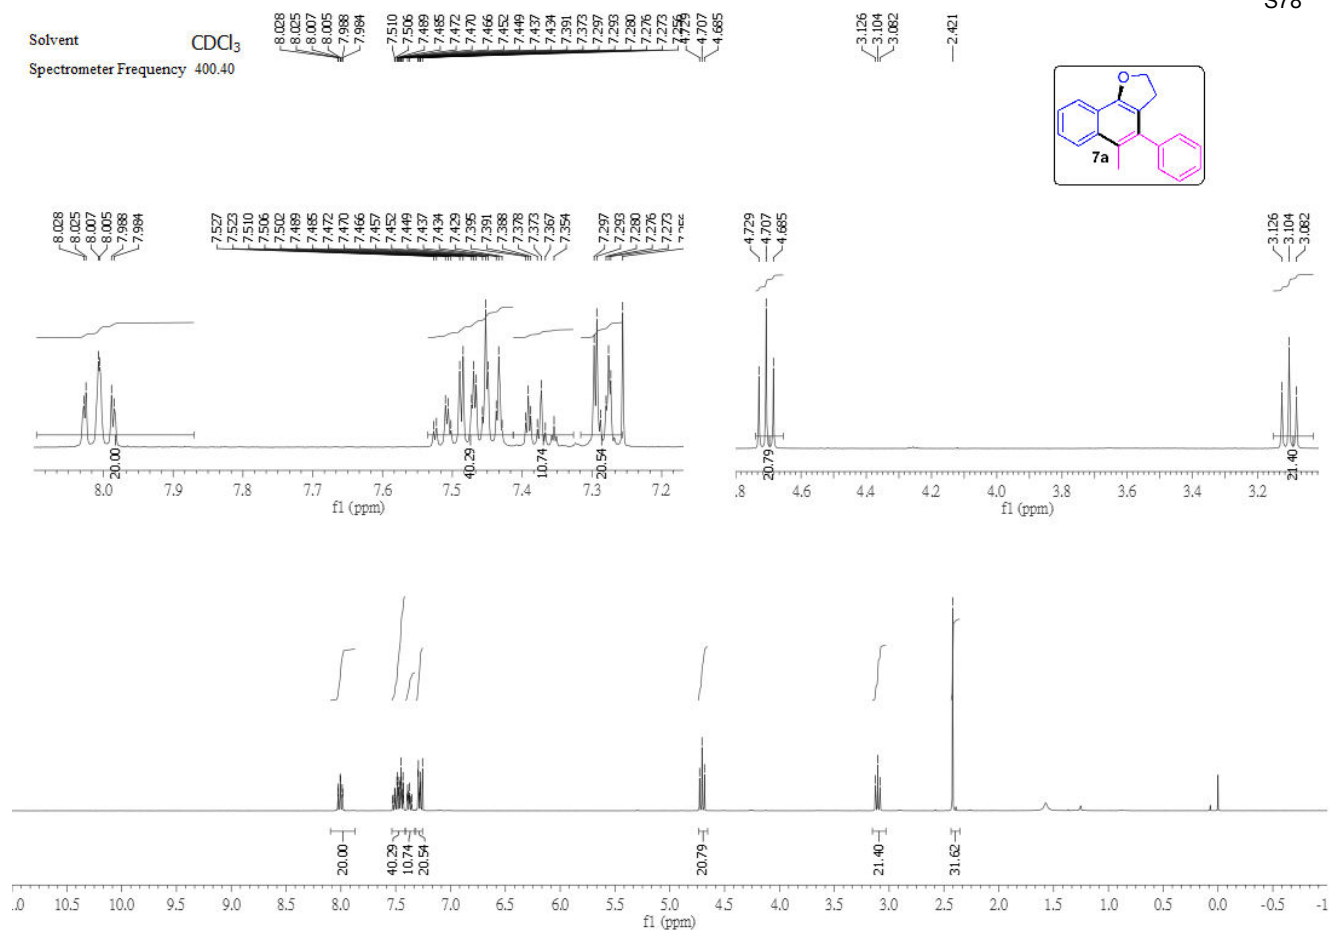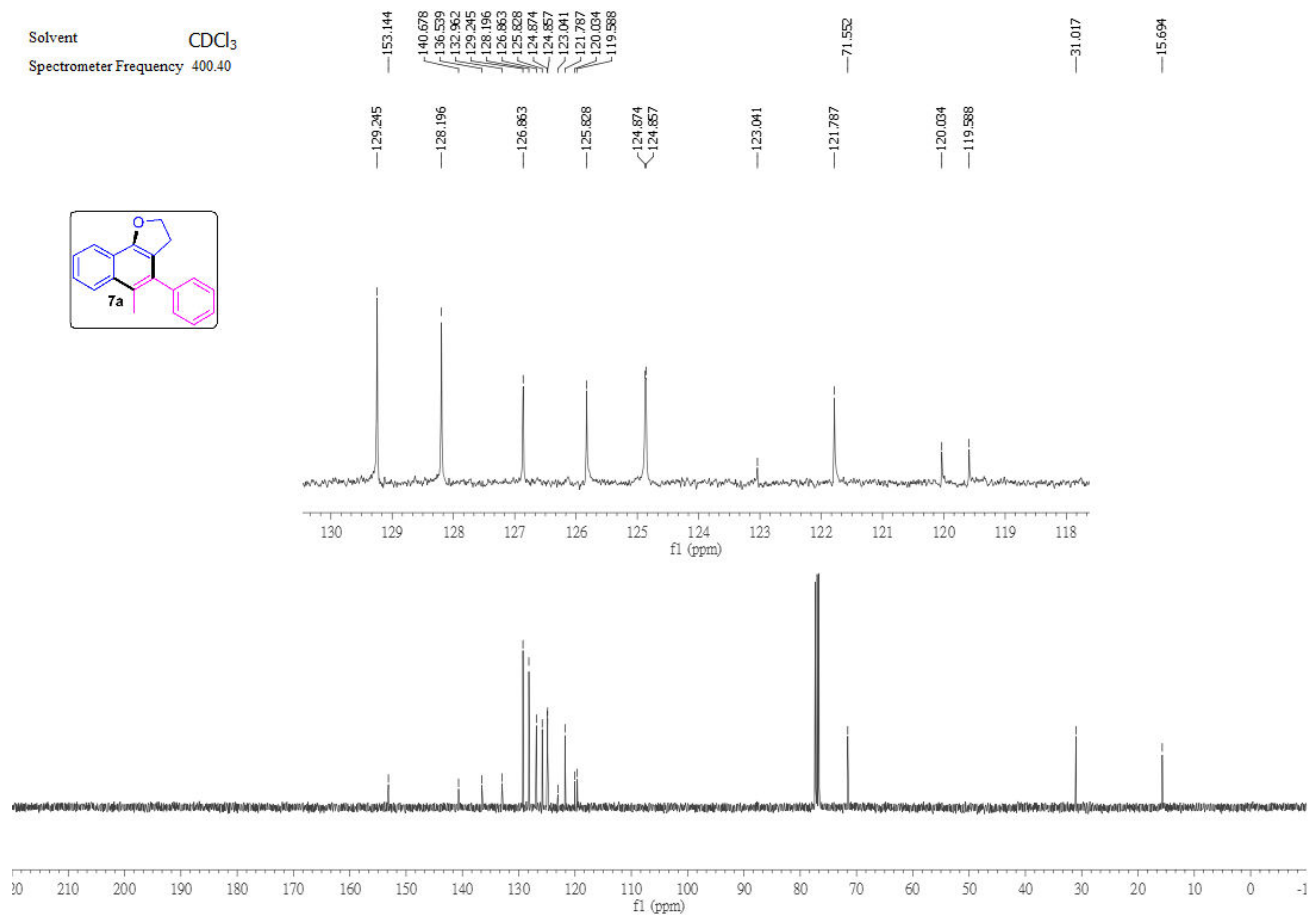



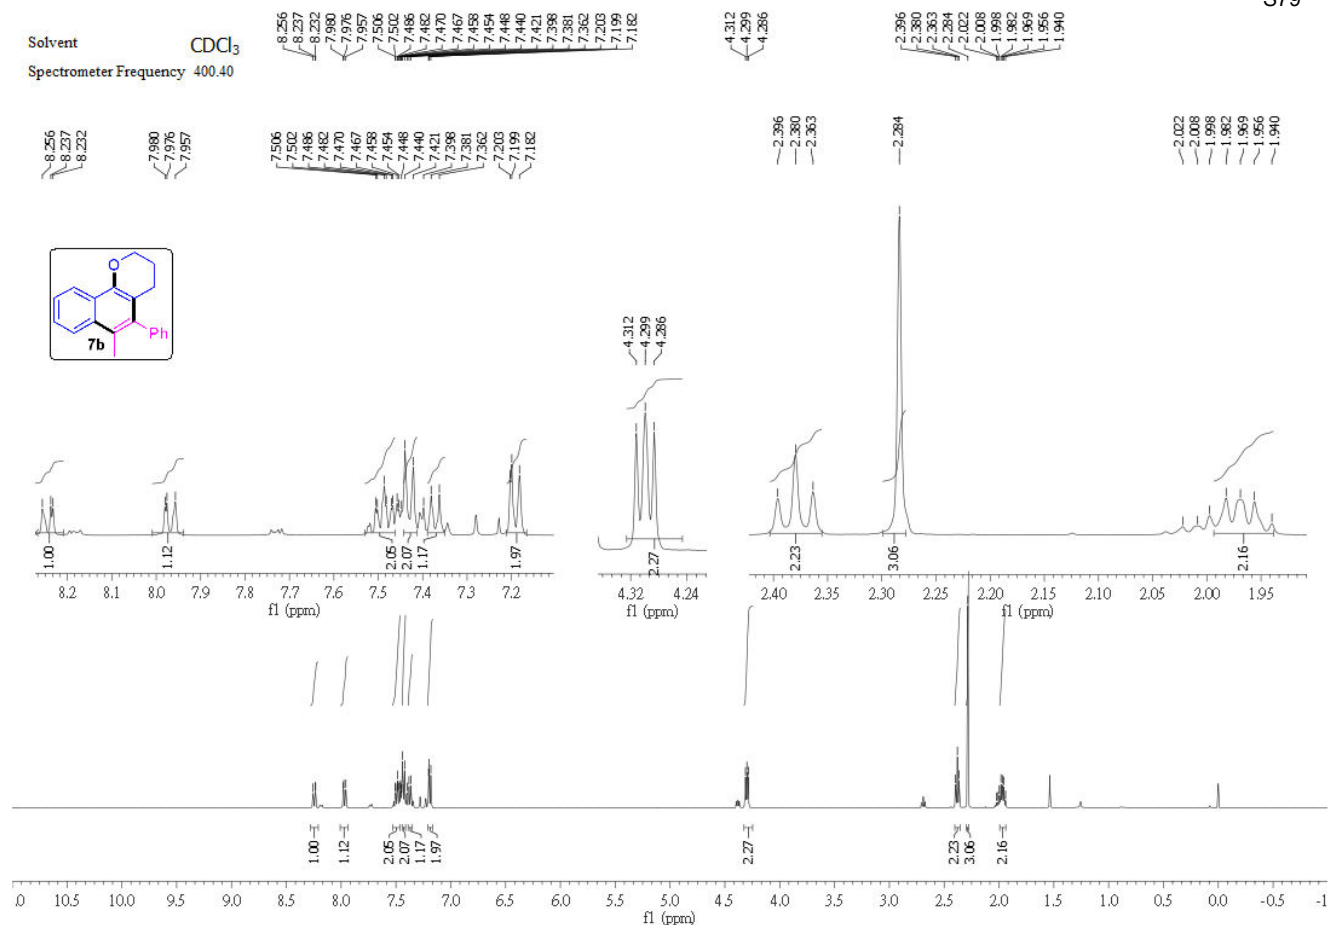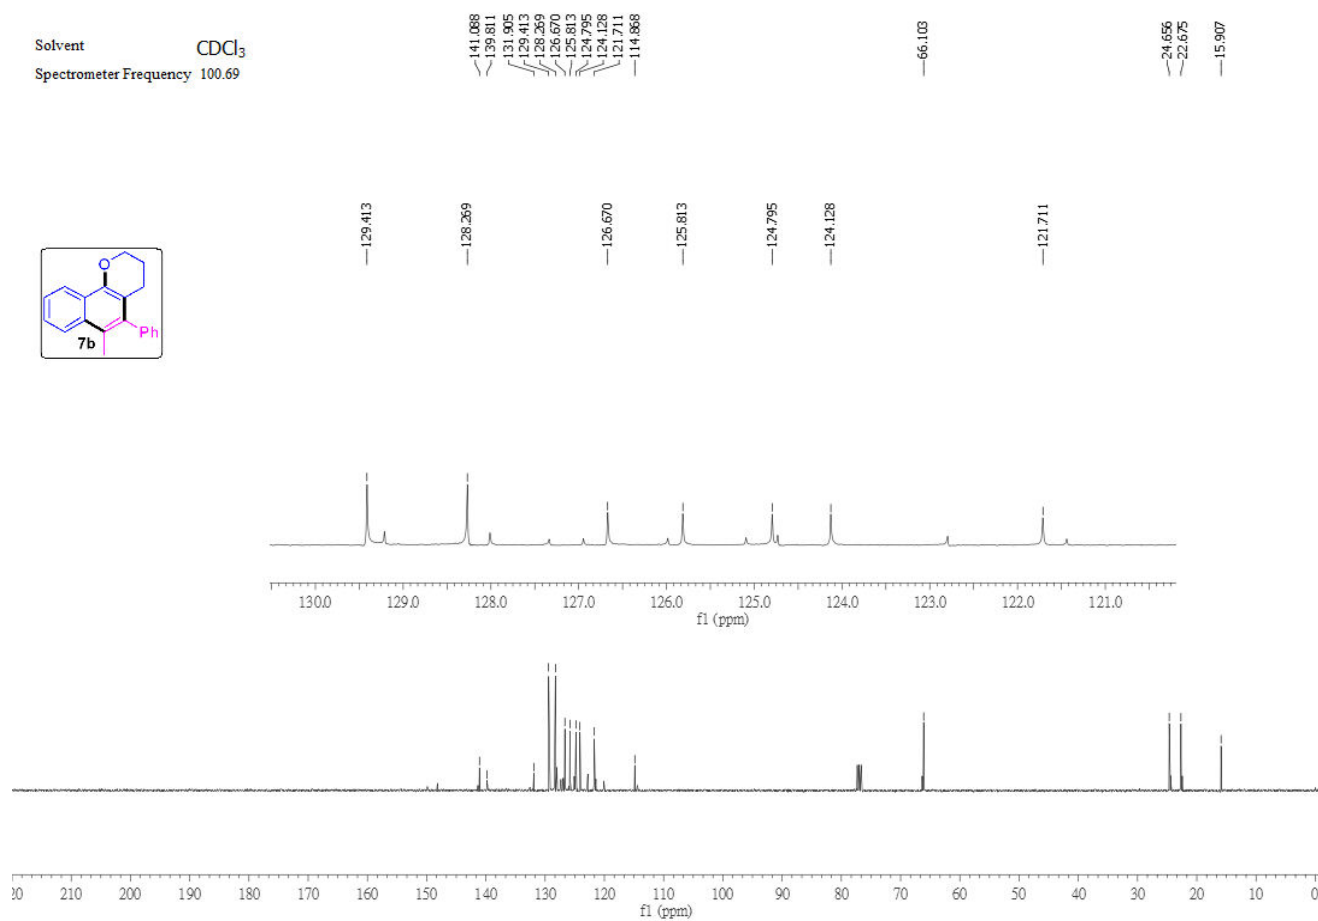



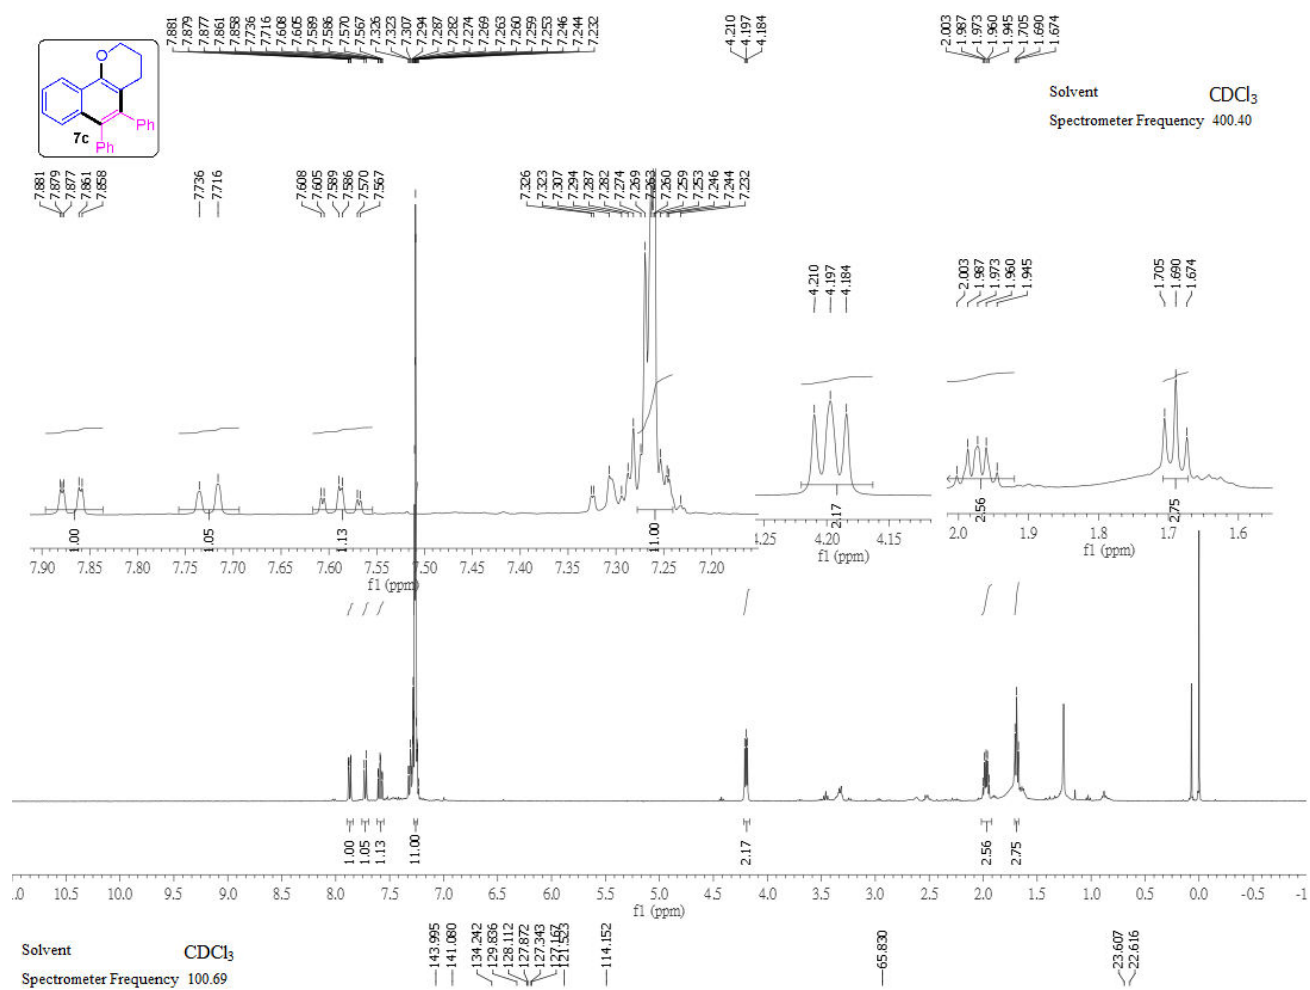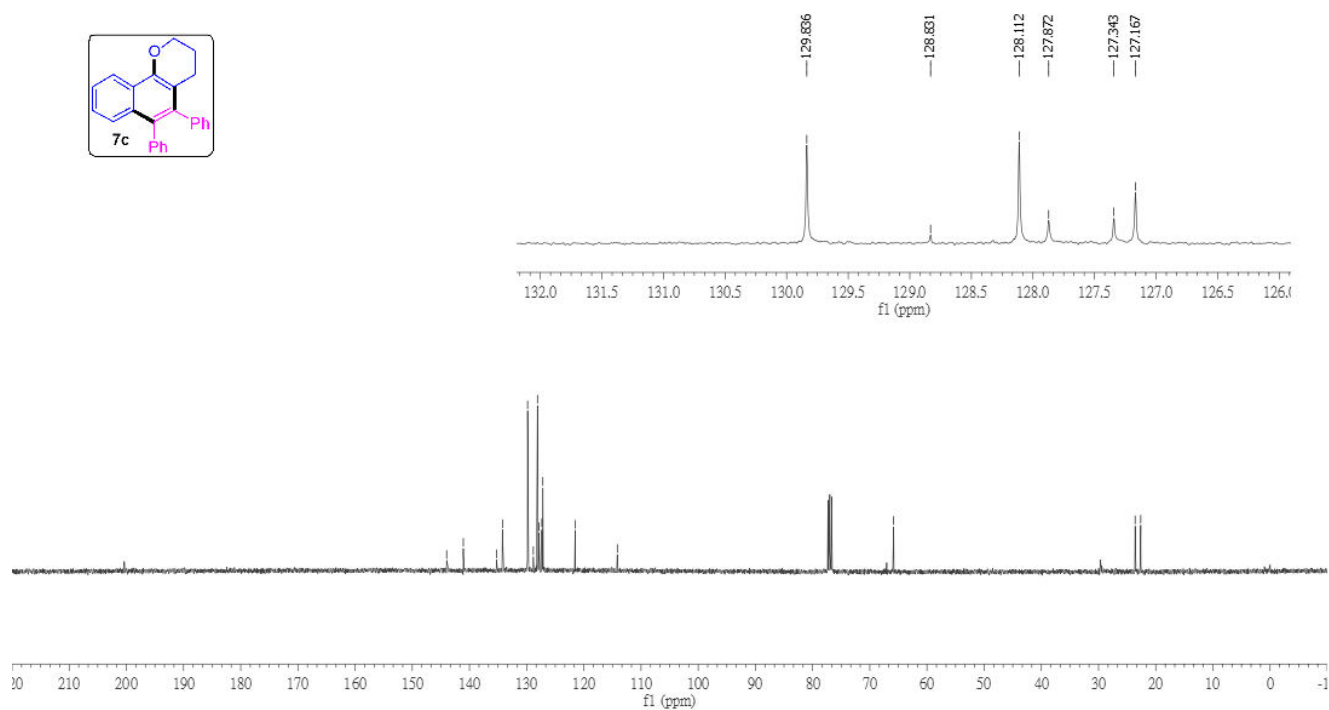



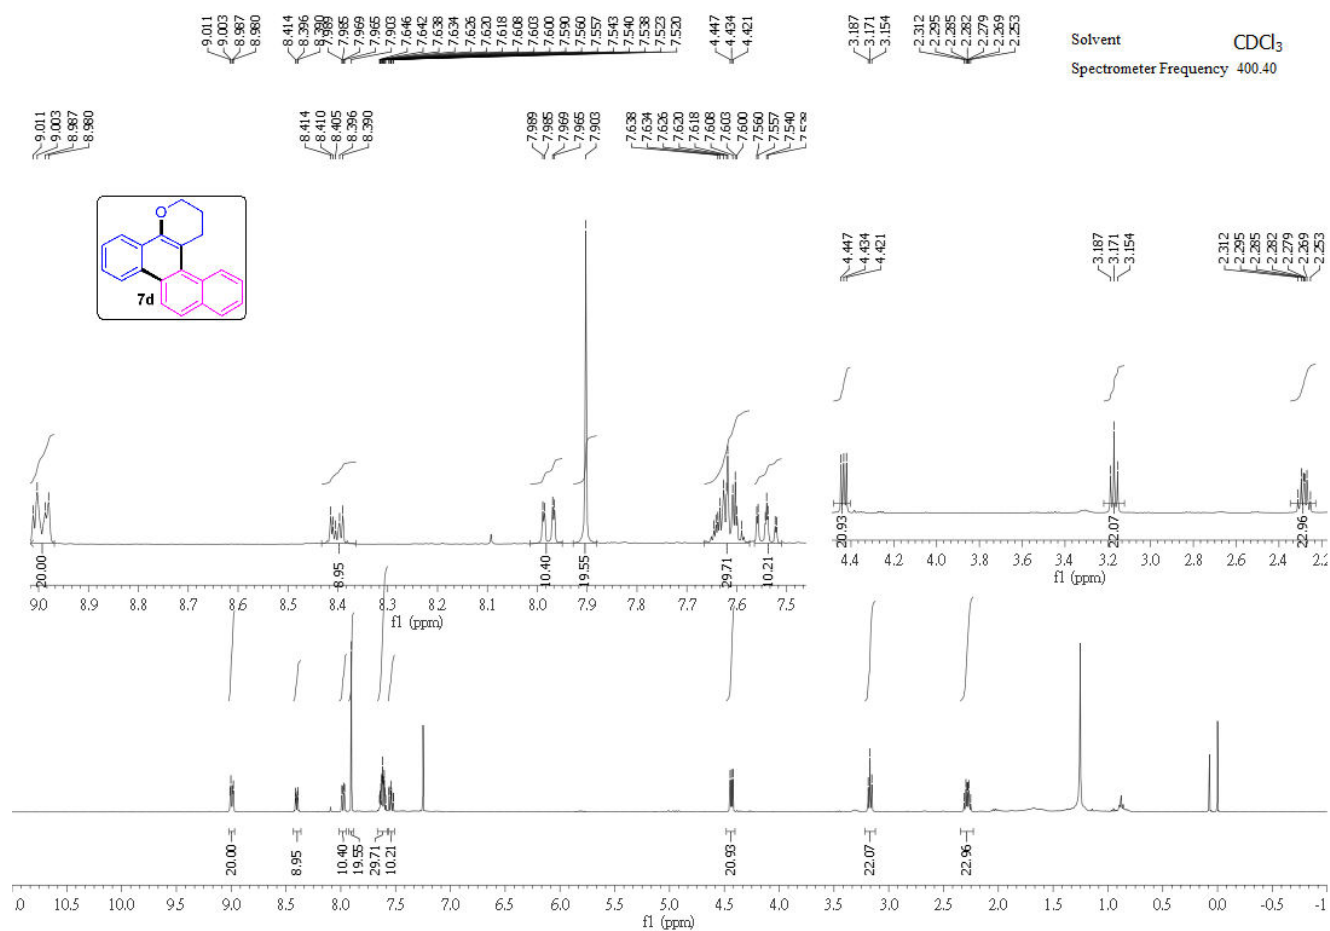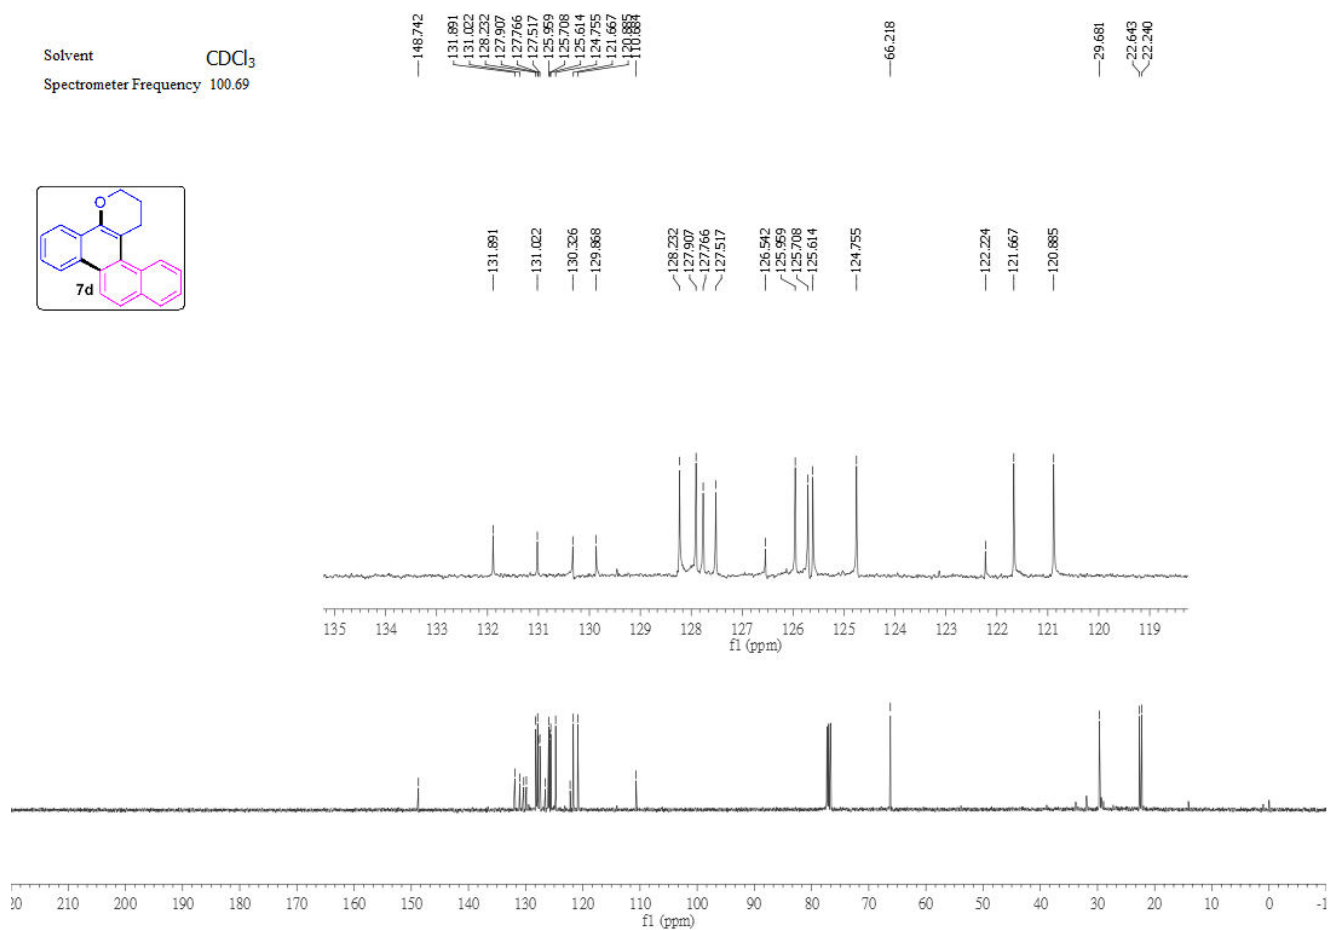



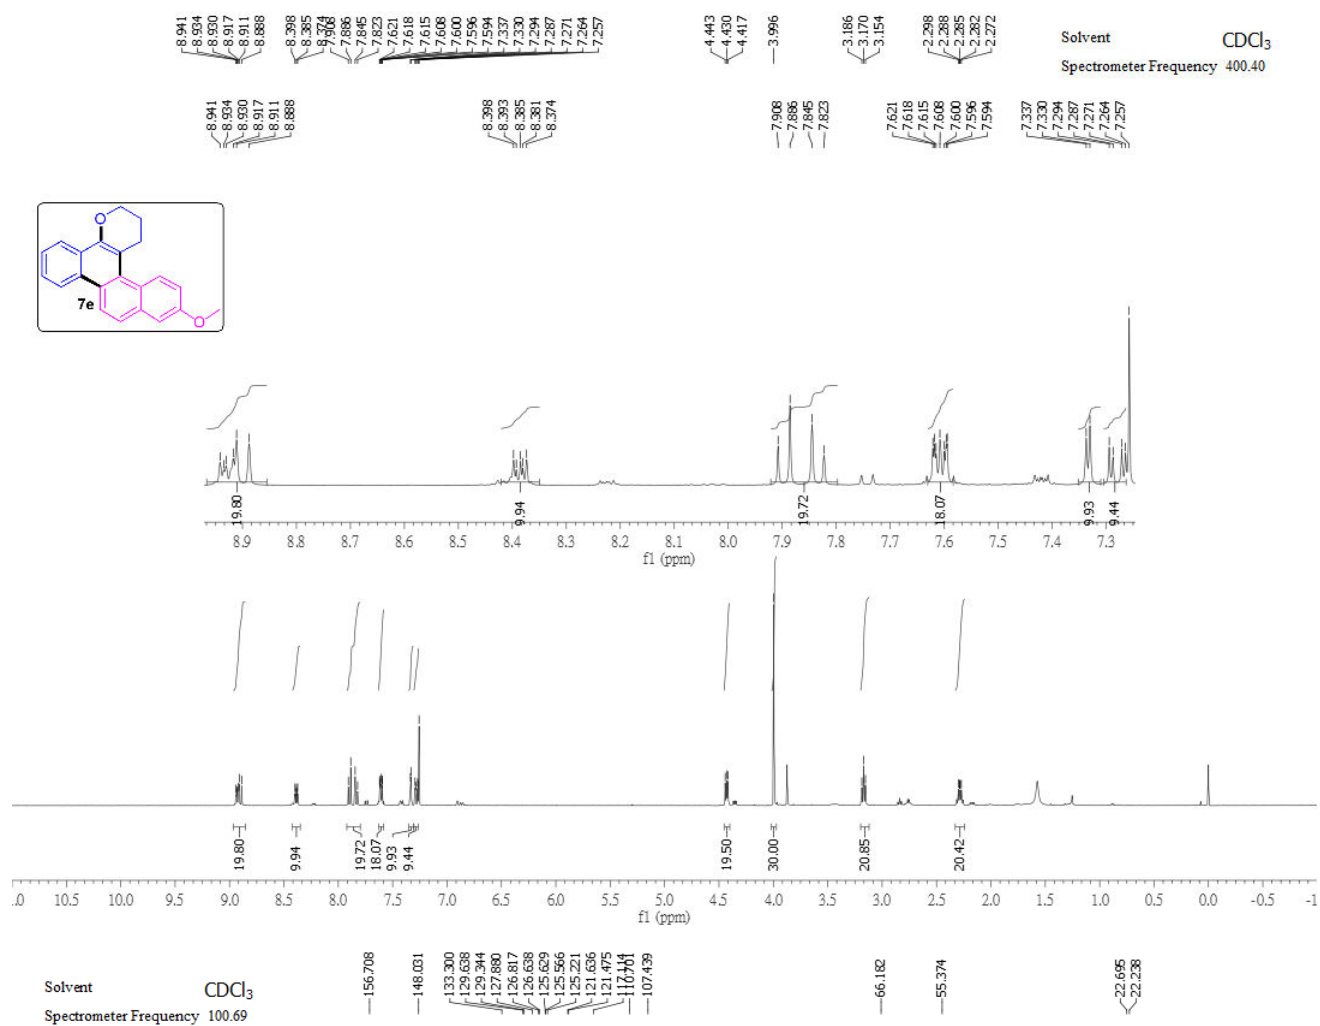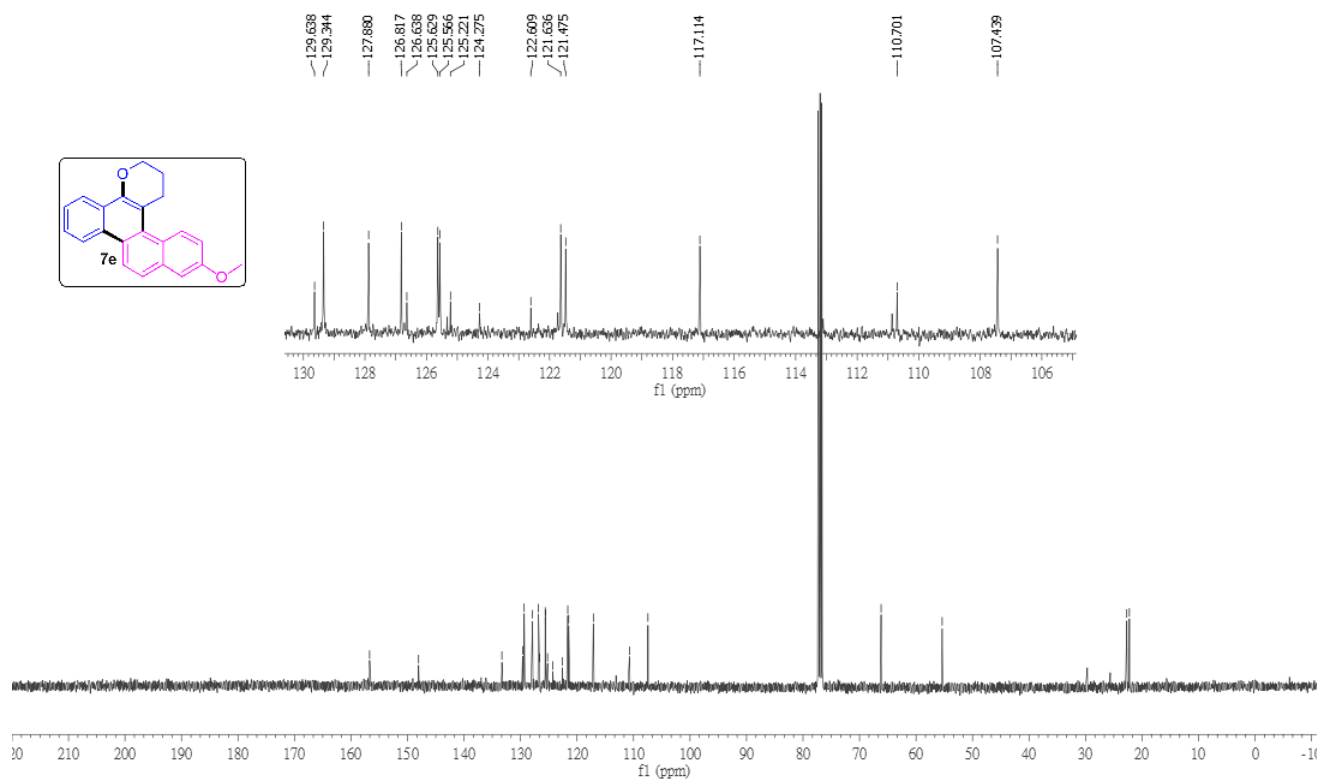



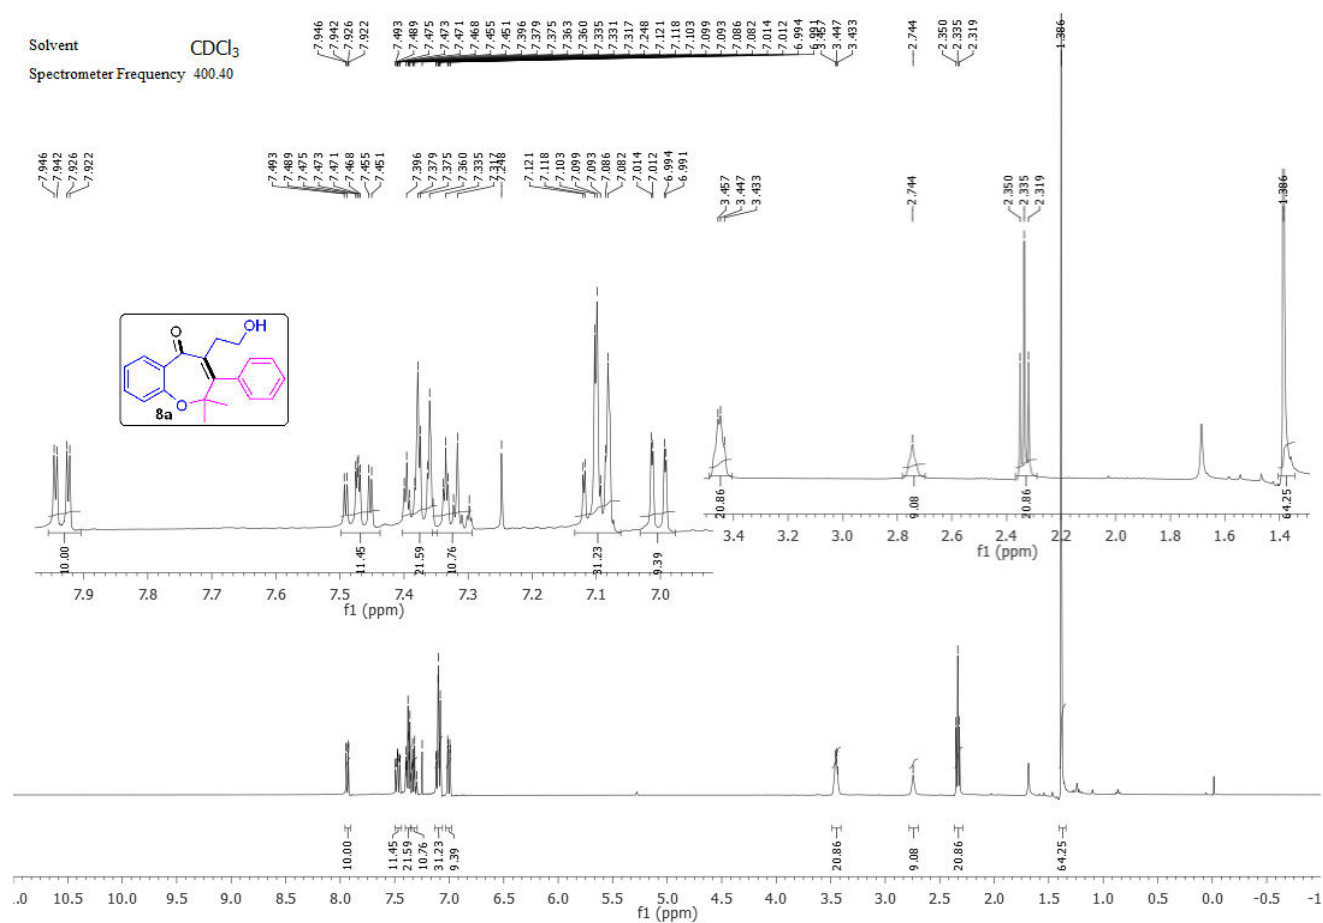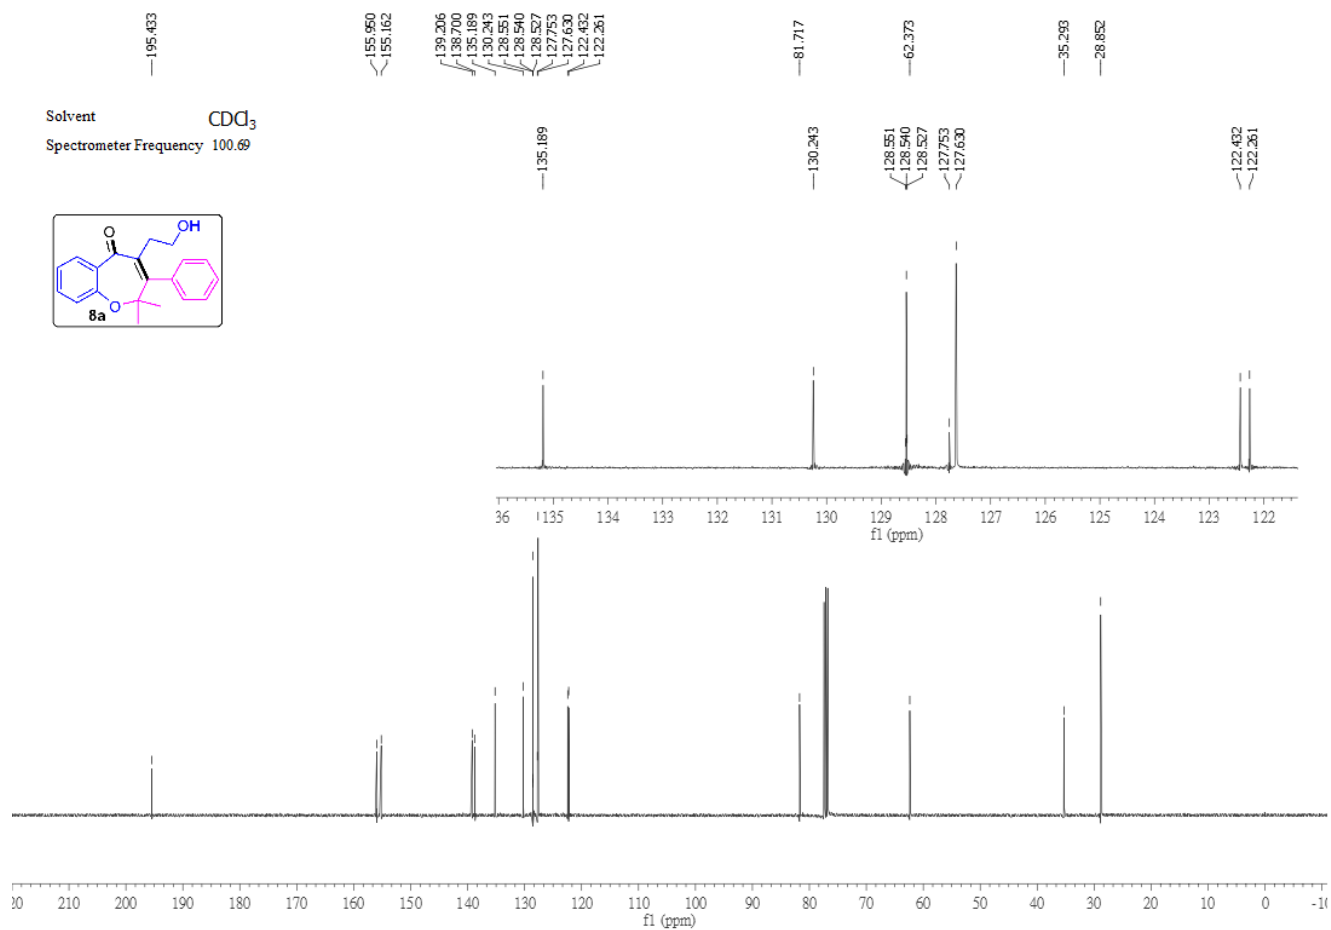



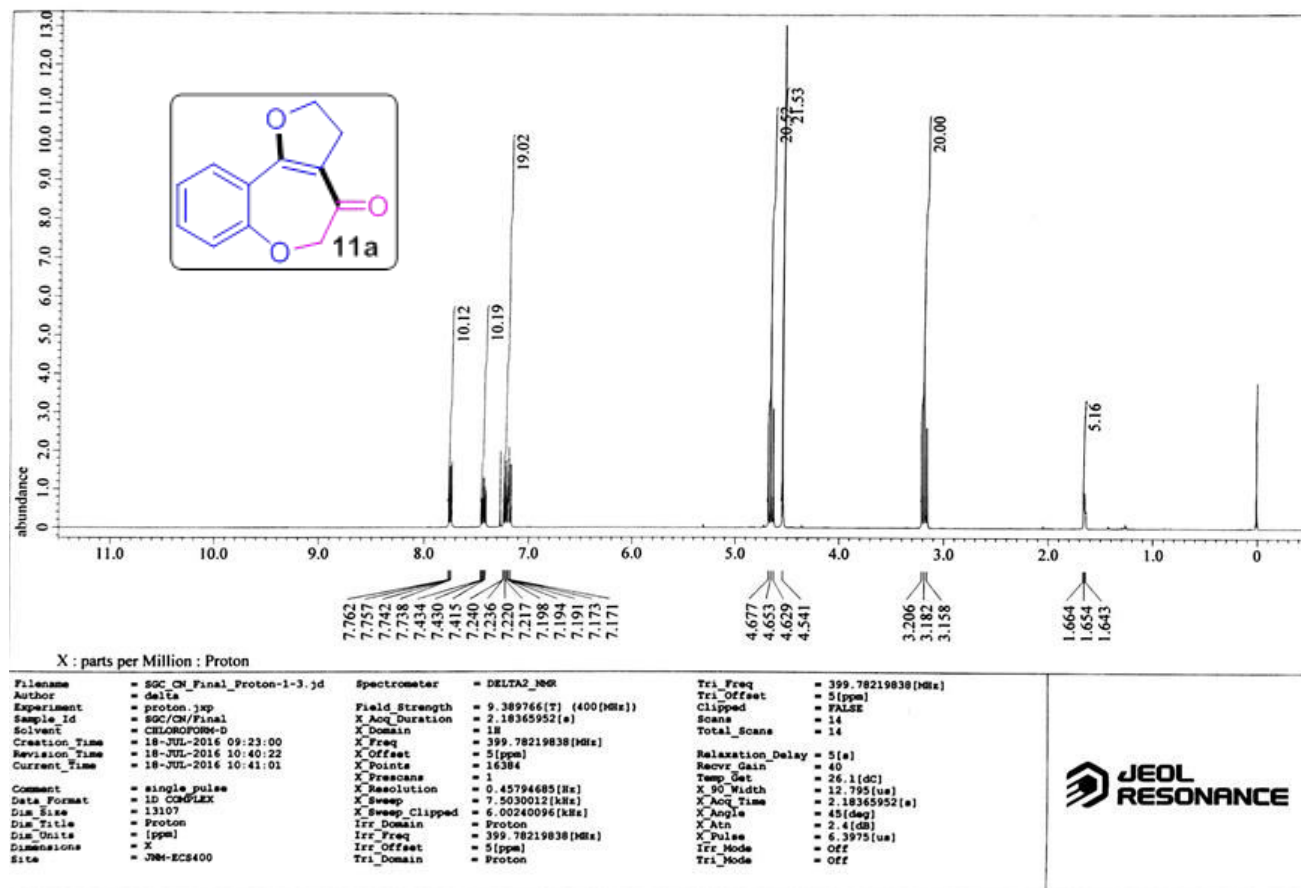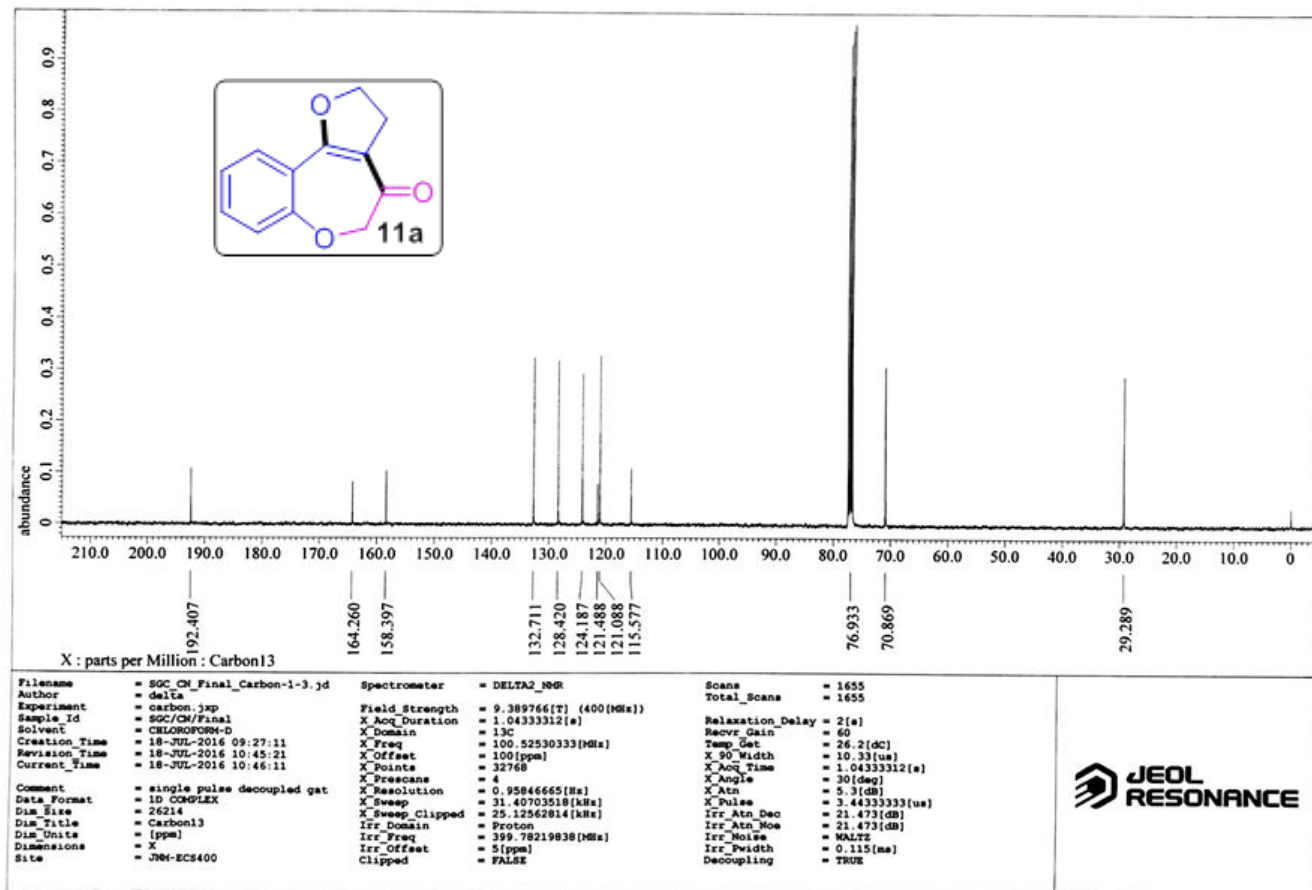



|                        |                   |
|------------------------|-------------------|
| Solvent                | CDCl <sub>3</sub> |
| Spectrometer Frequency | 400.40            |

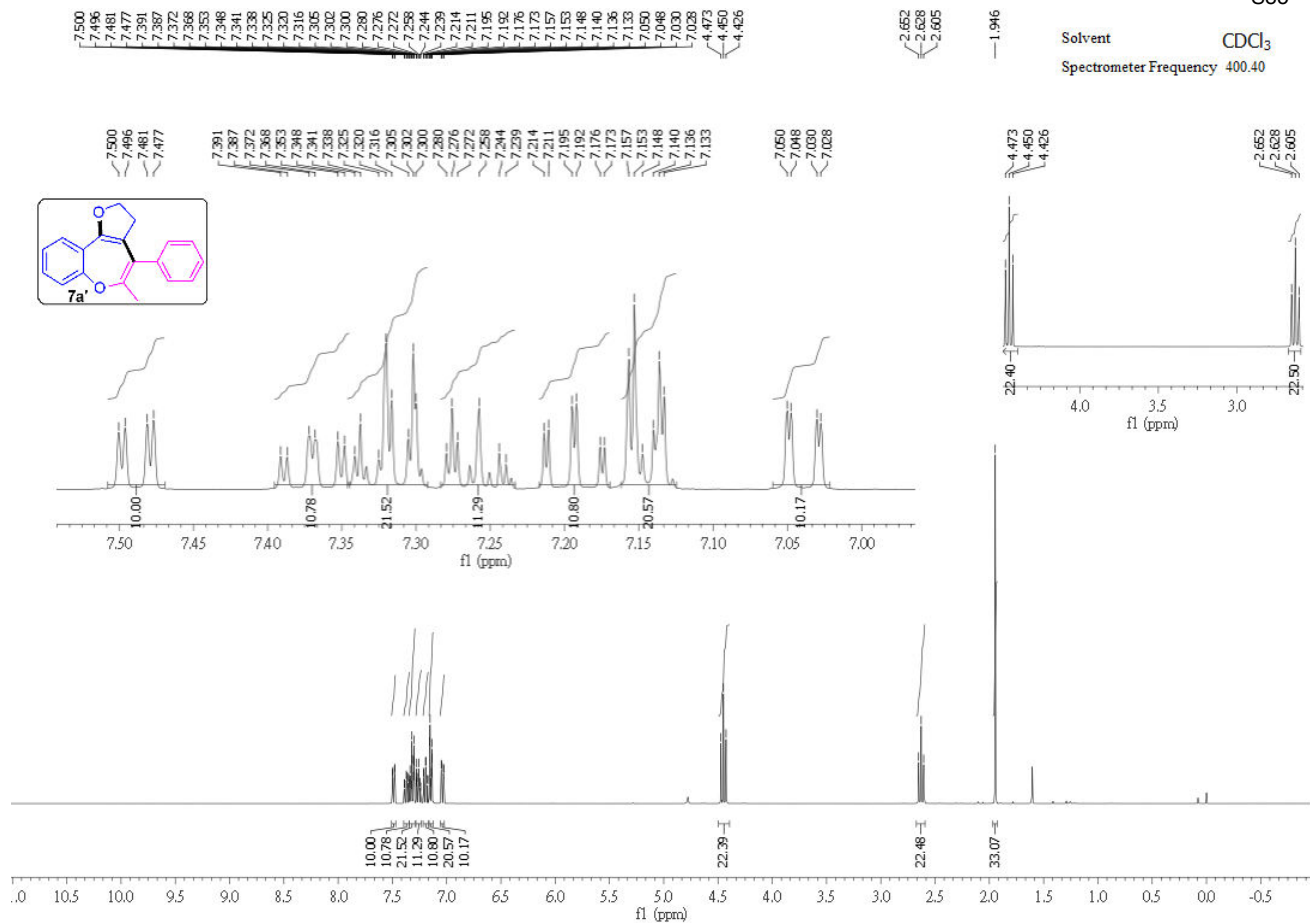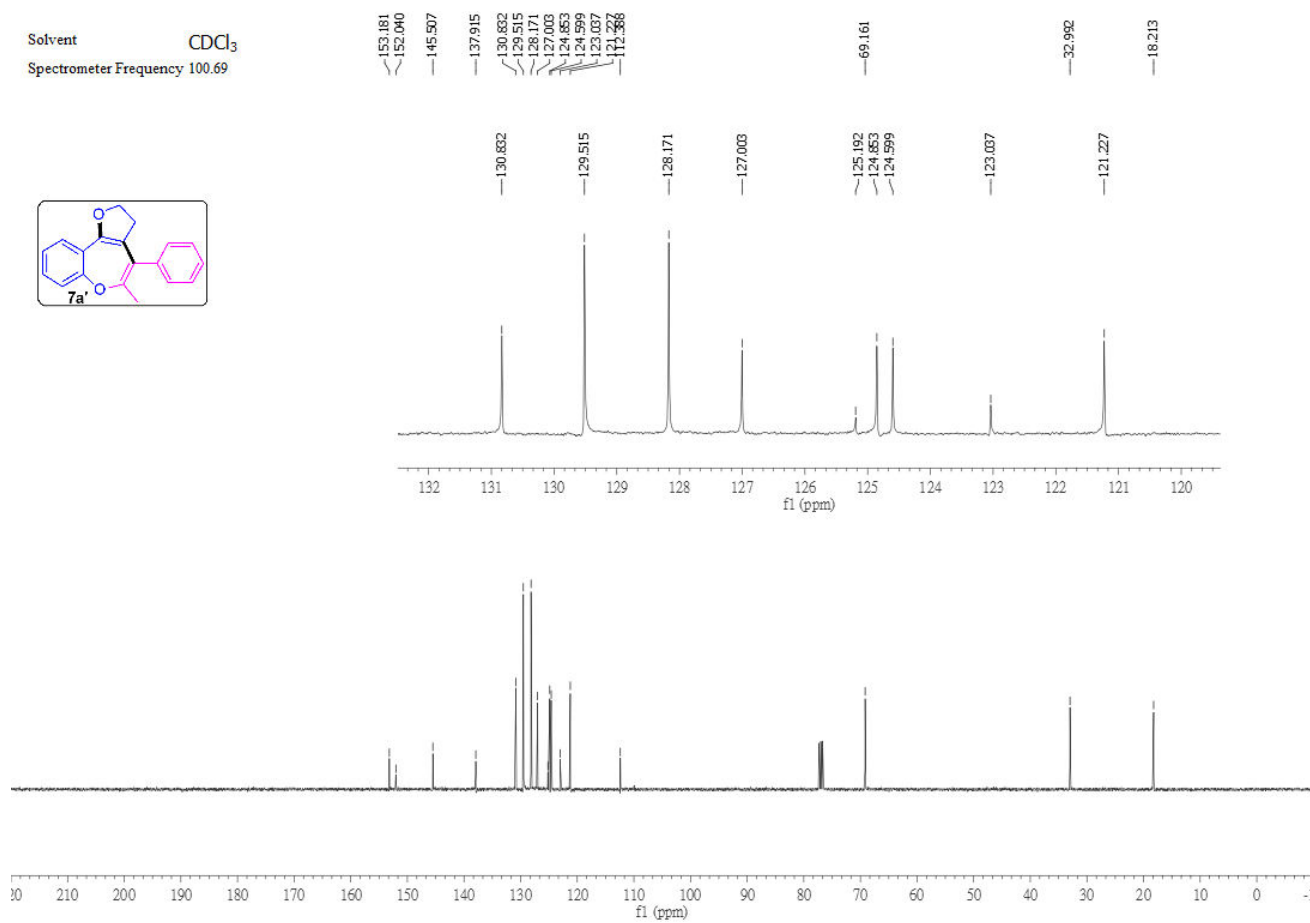



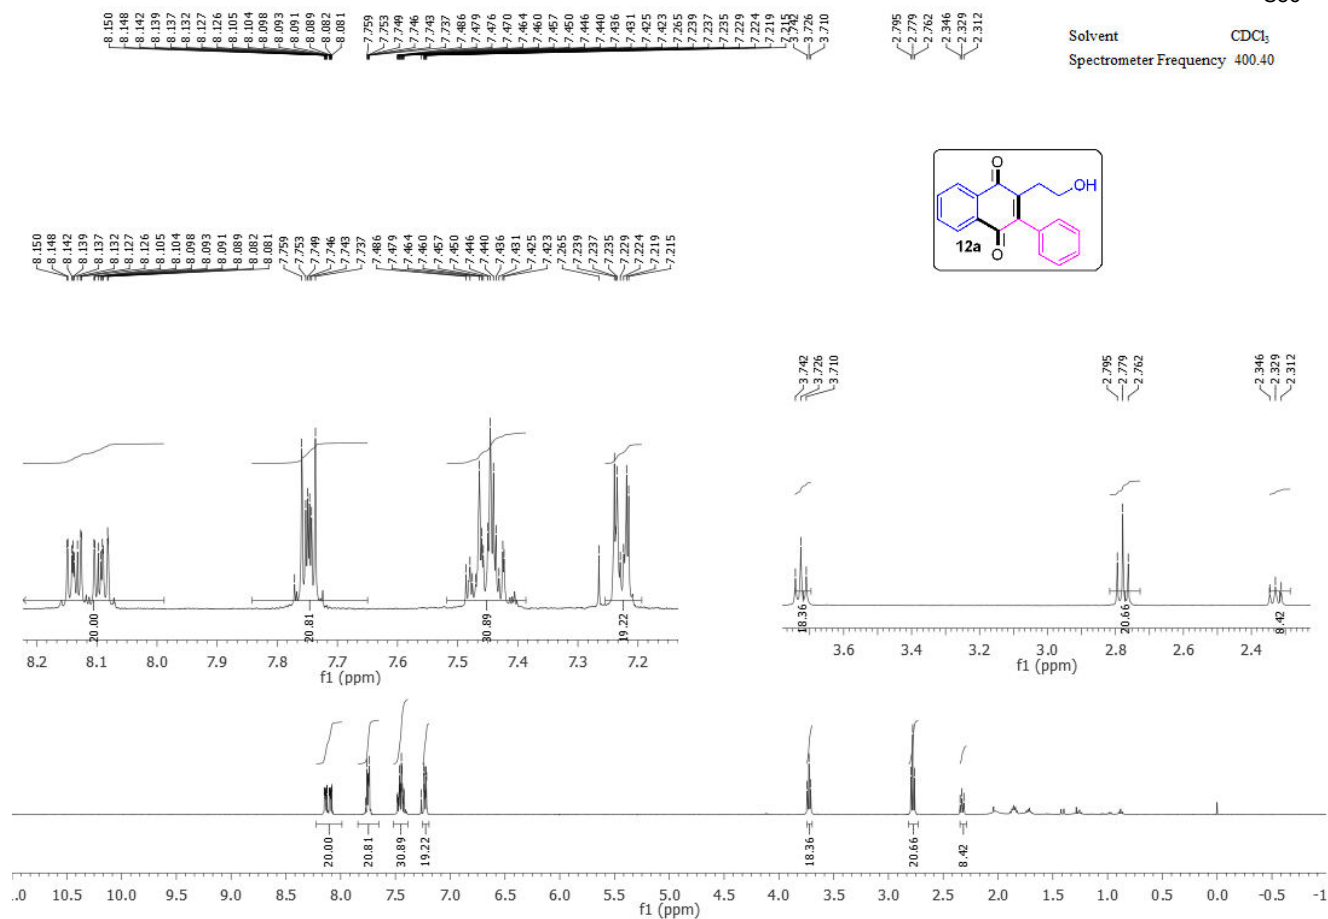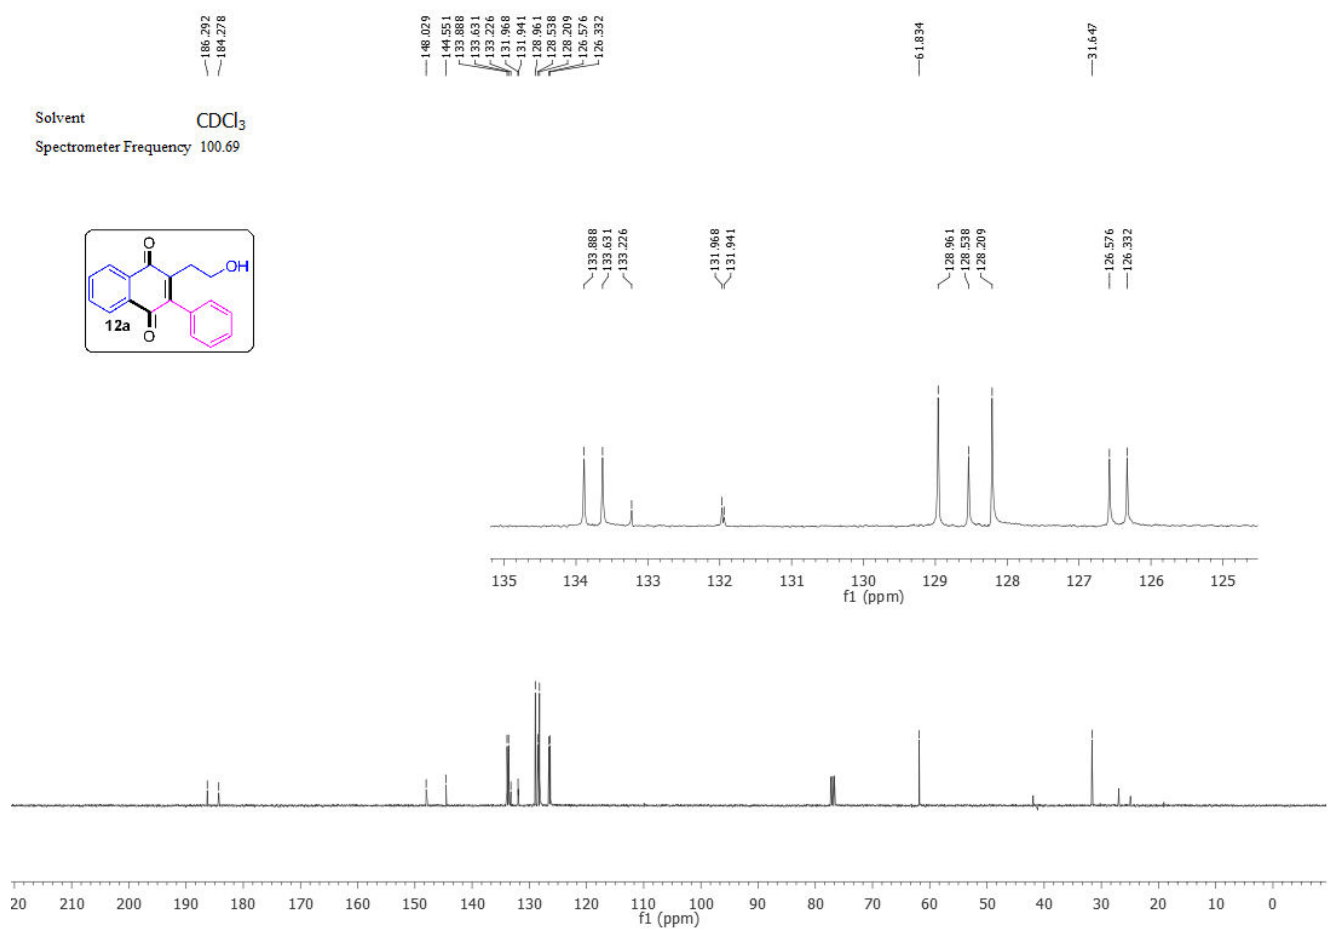



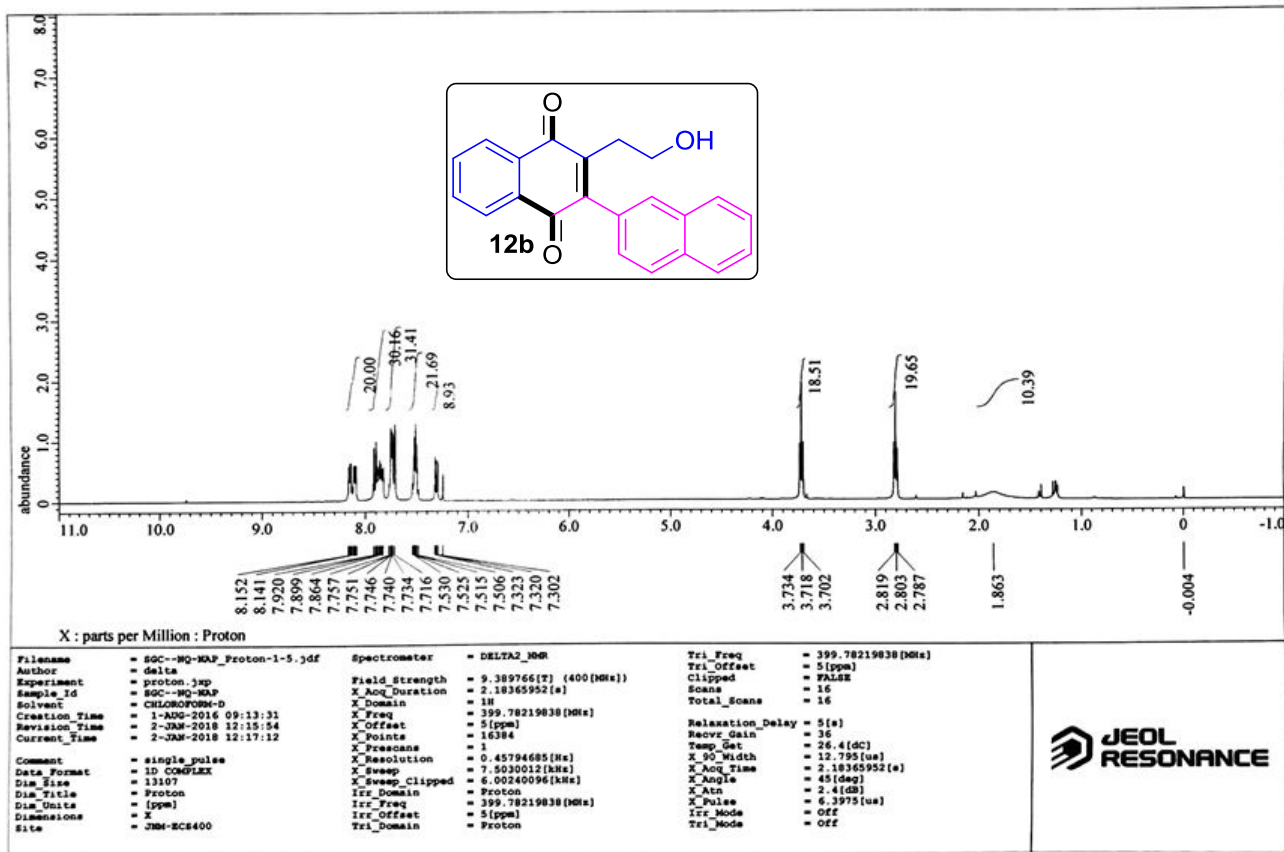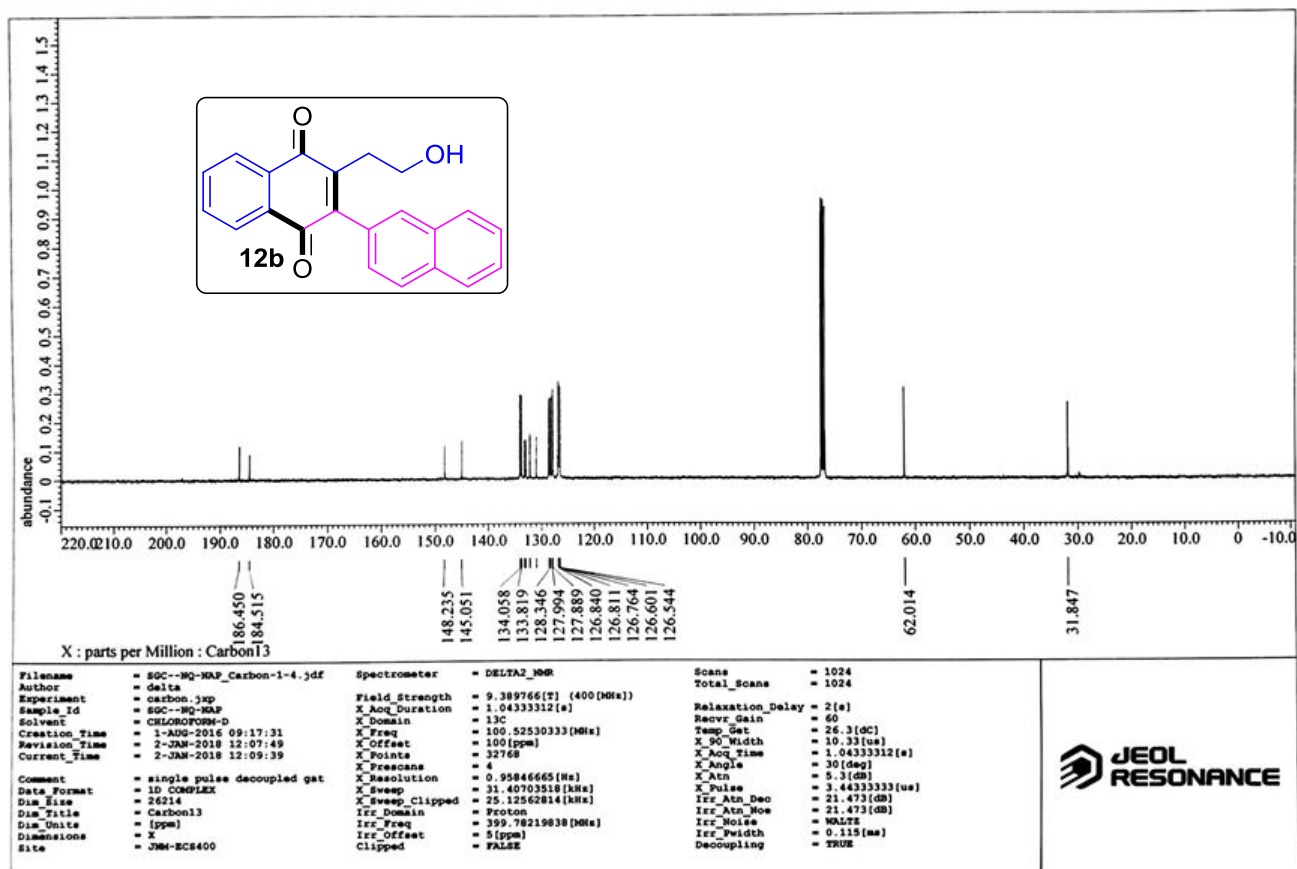



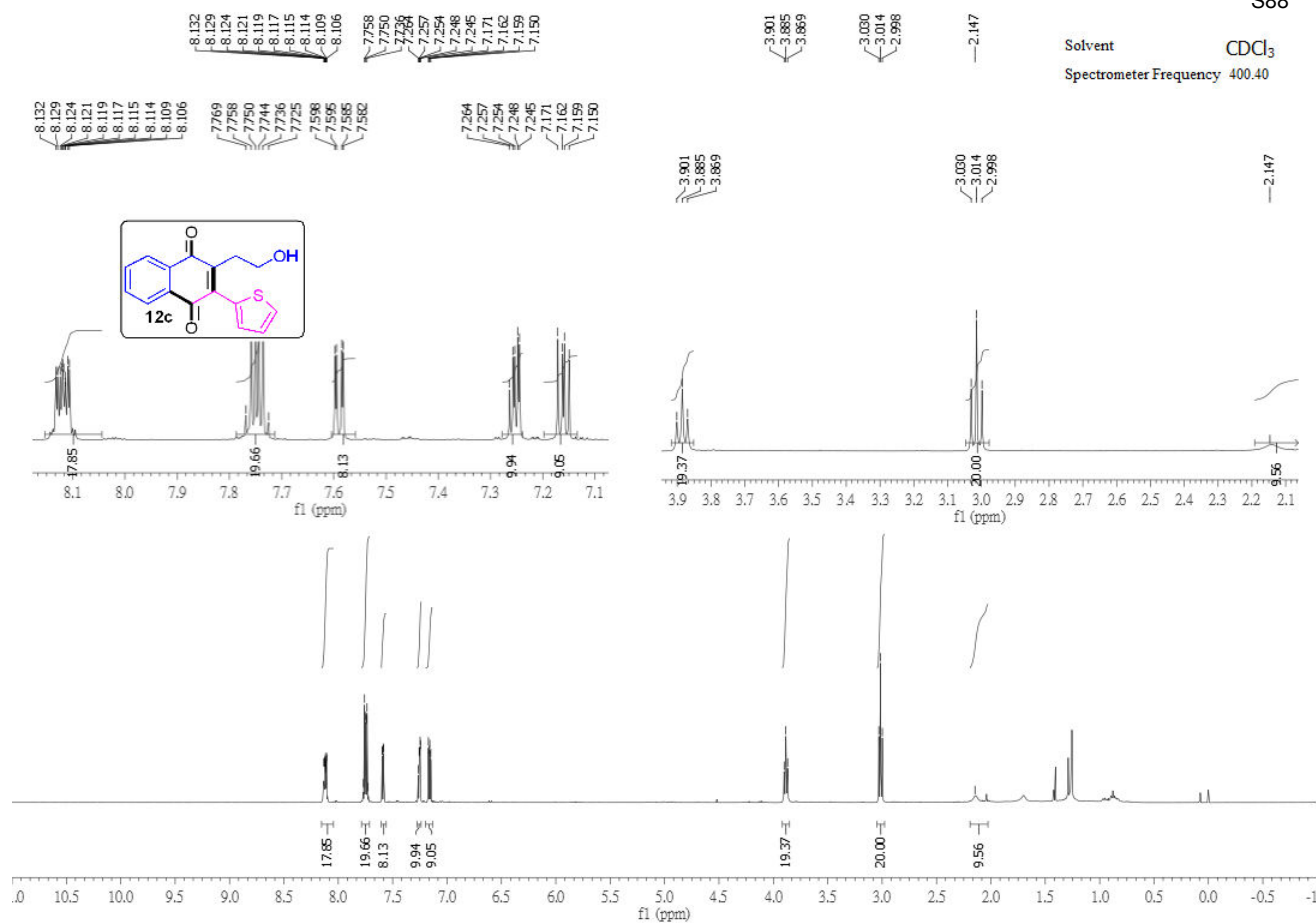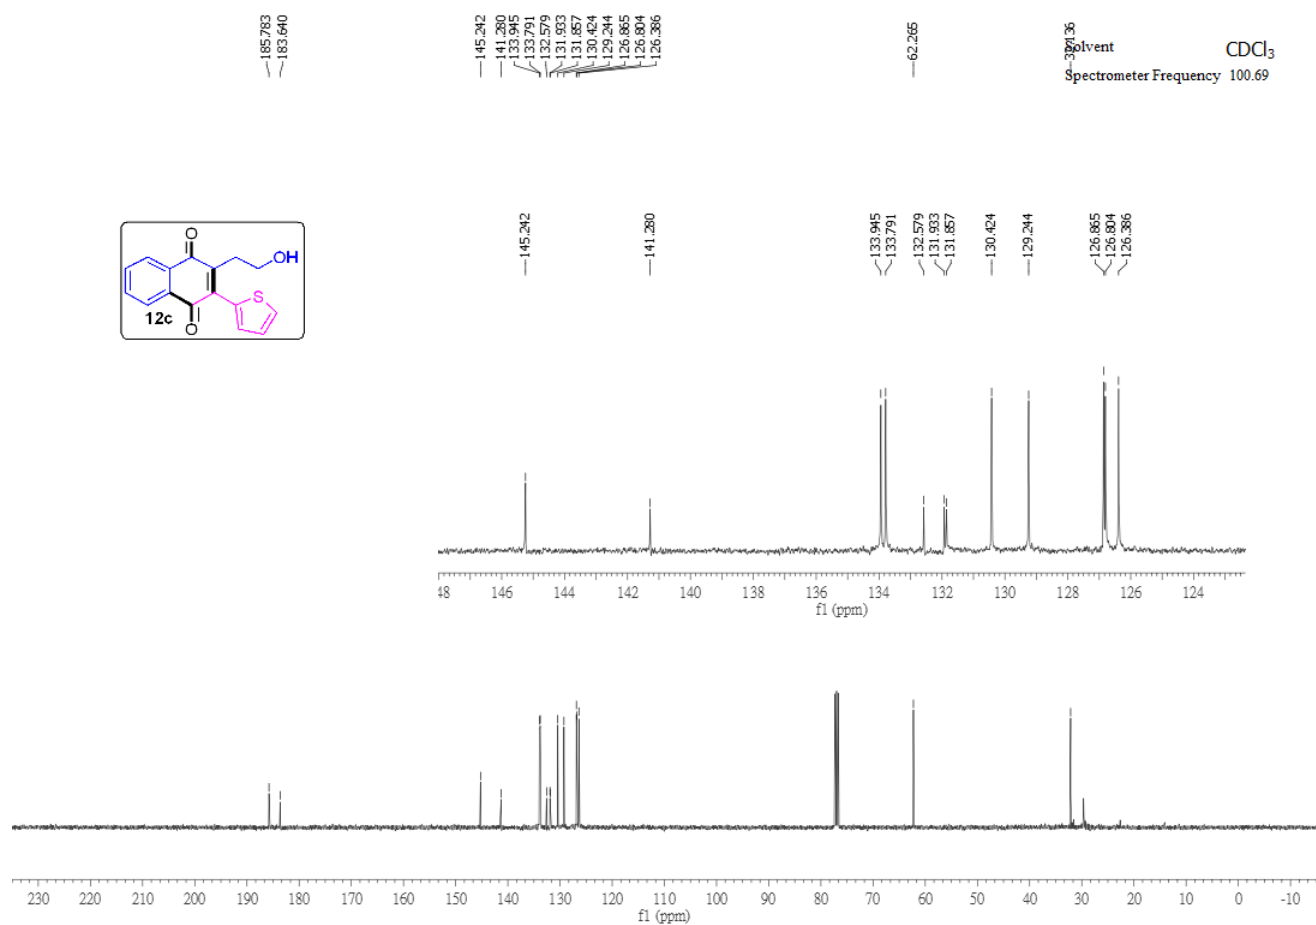



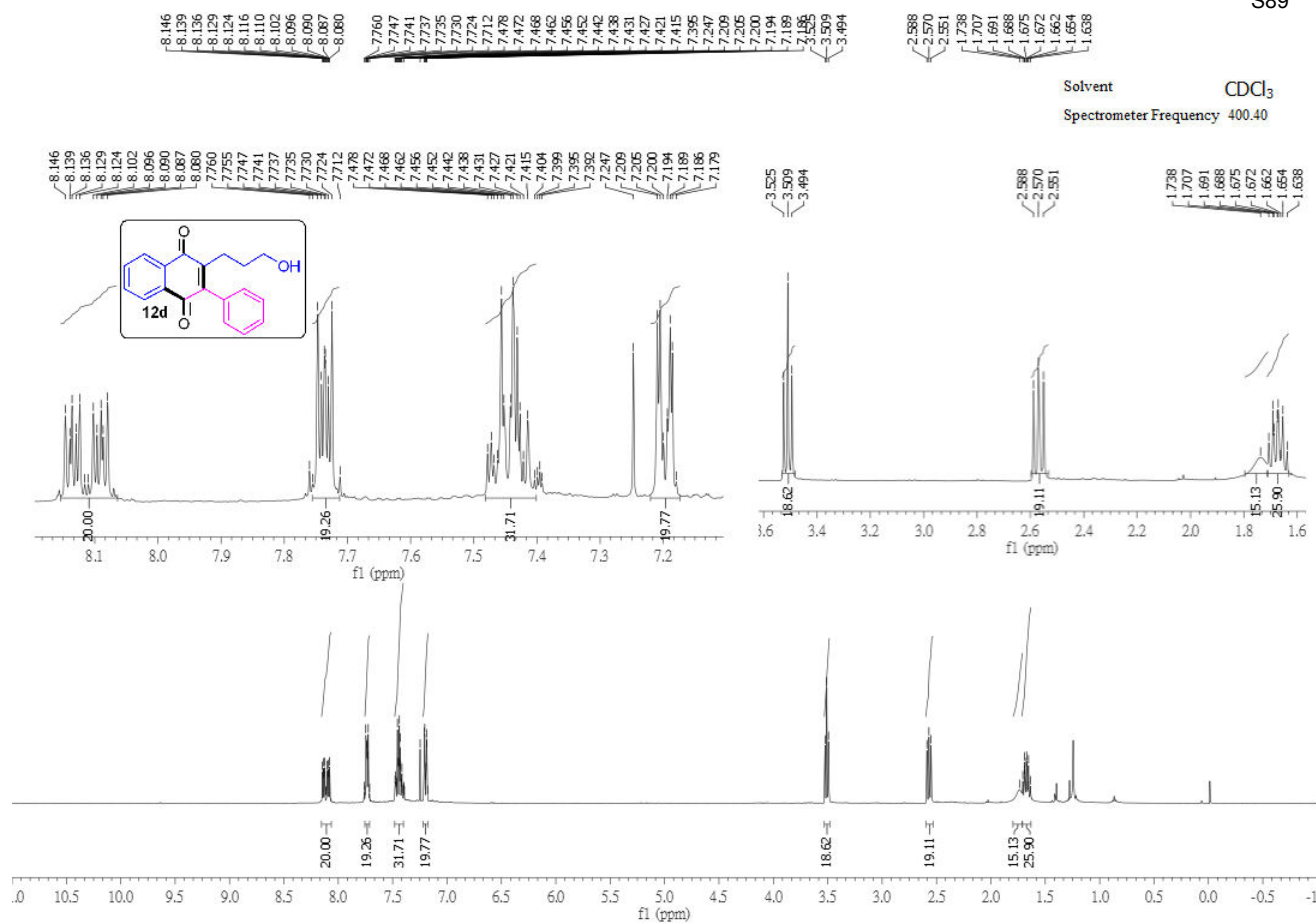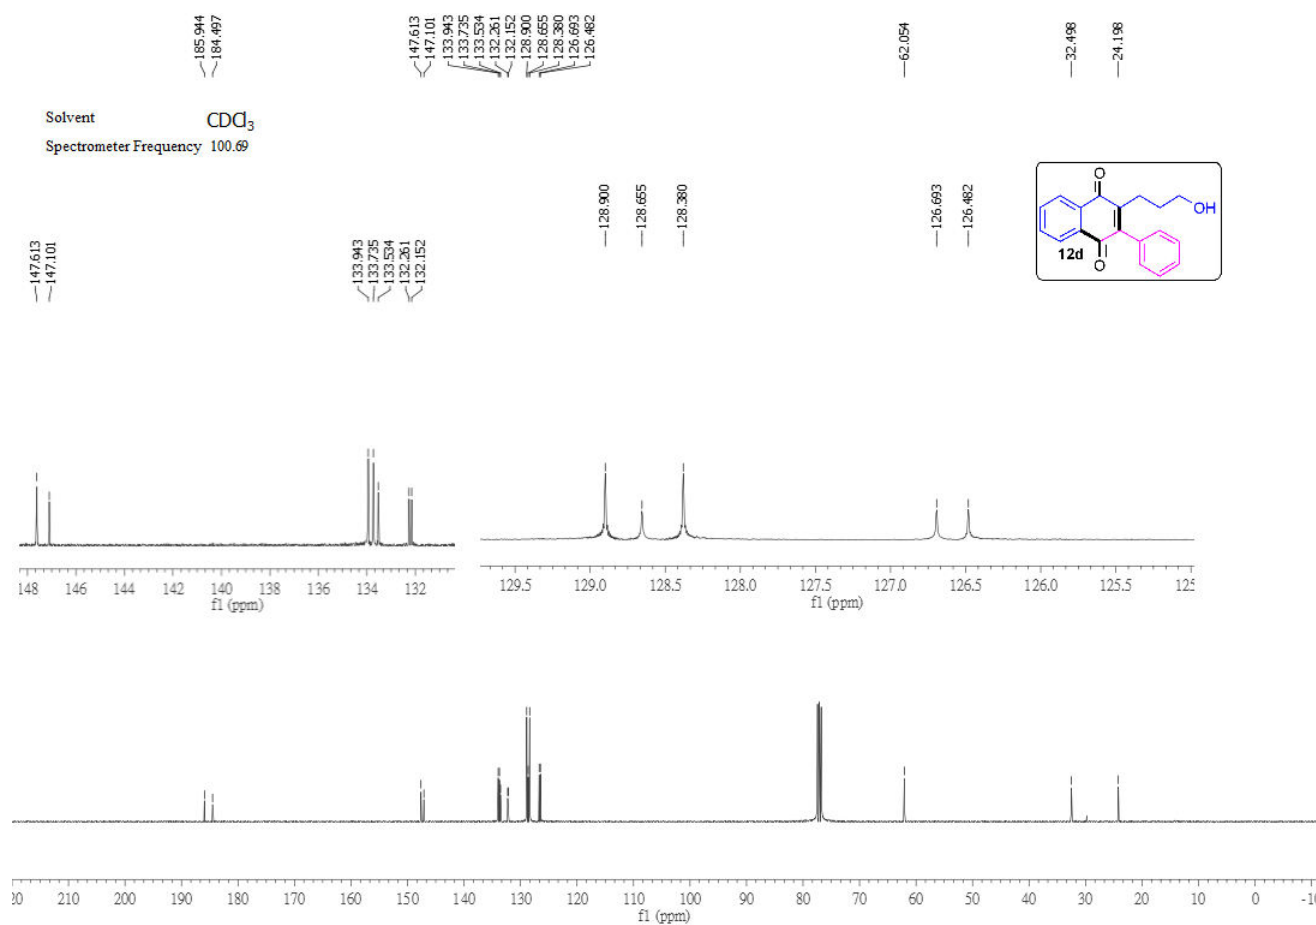



Solvent  $\text{CDCl}_3$   
Spectrometer Frequency 400.40

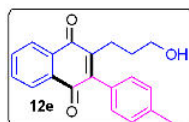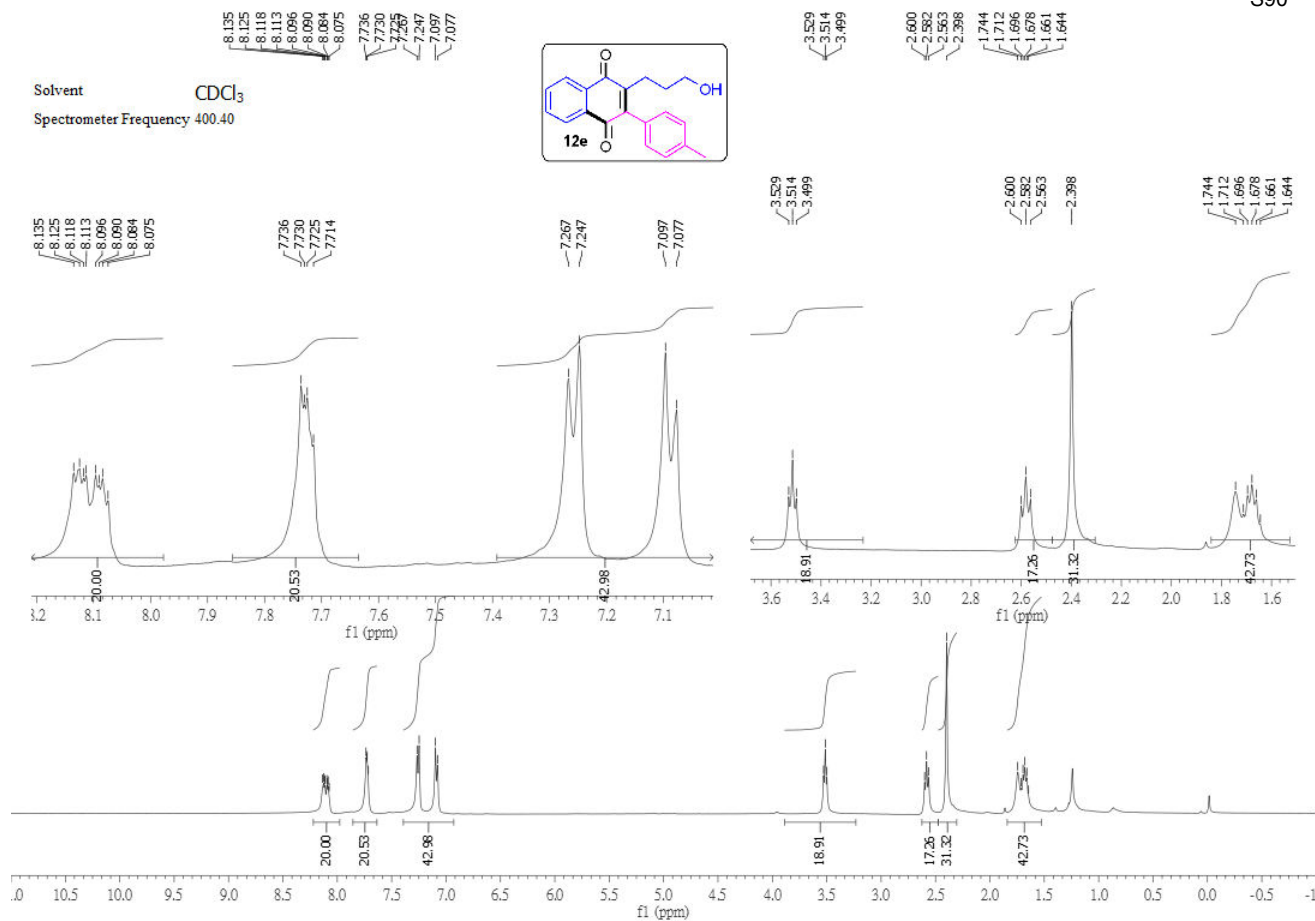

Solvent  $\text{CDCl}_3$   
Spectrometer Frequency 100.69

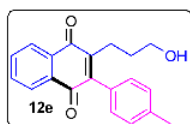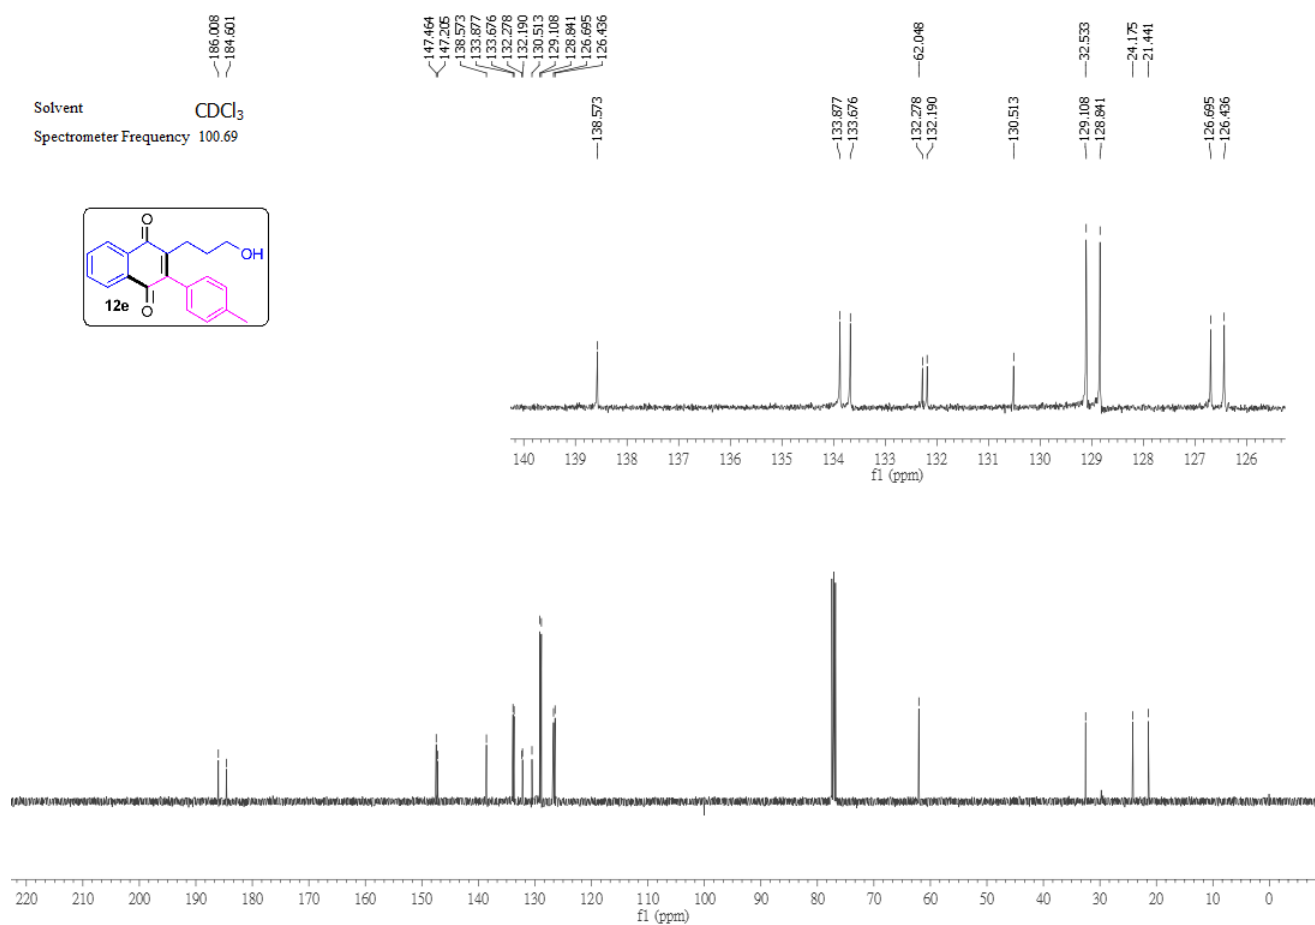



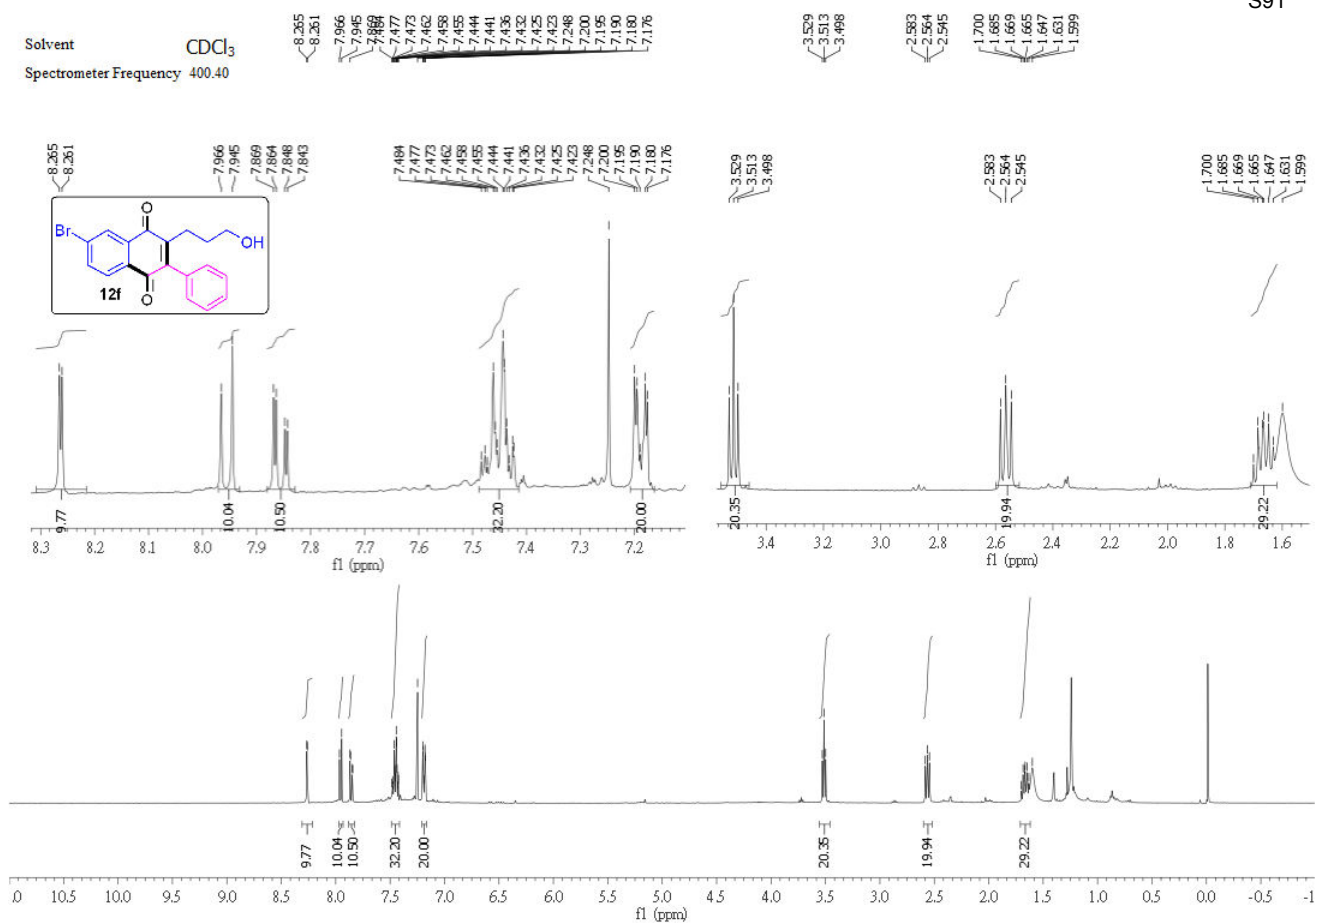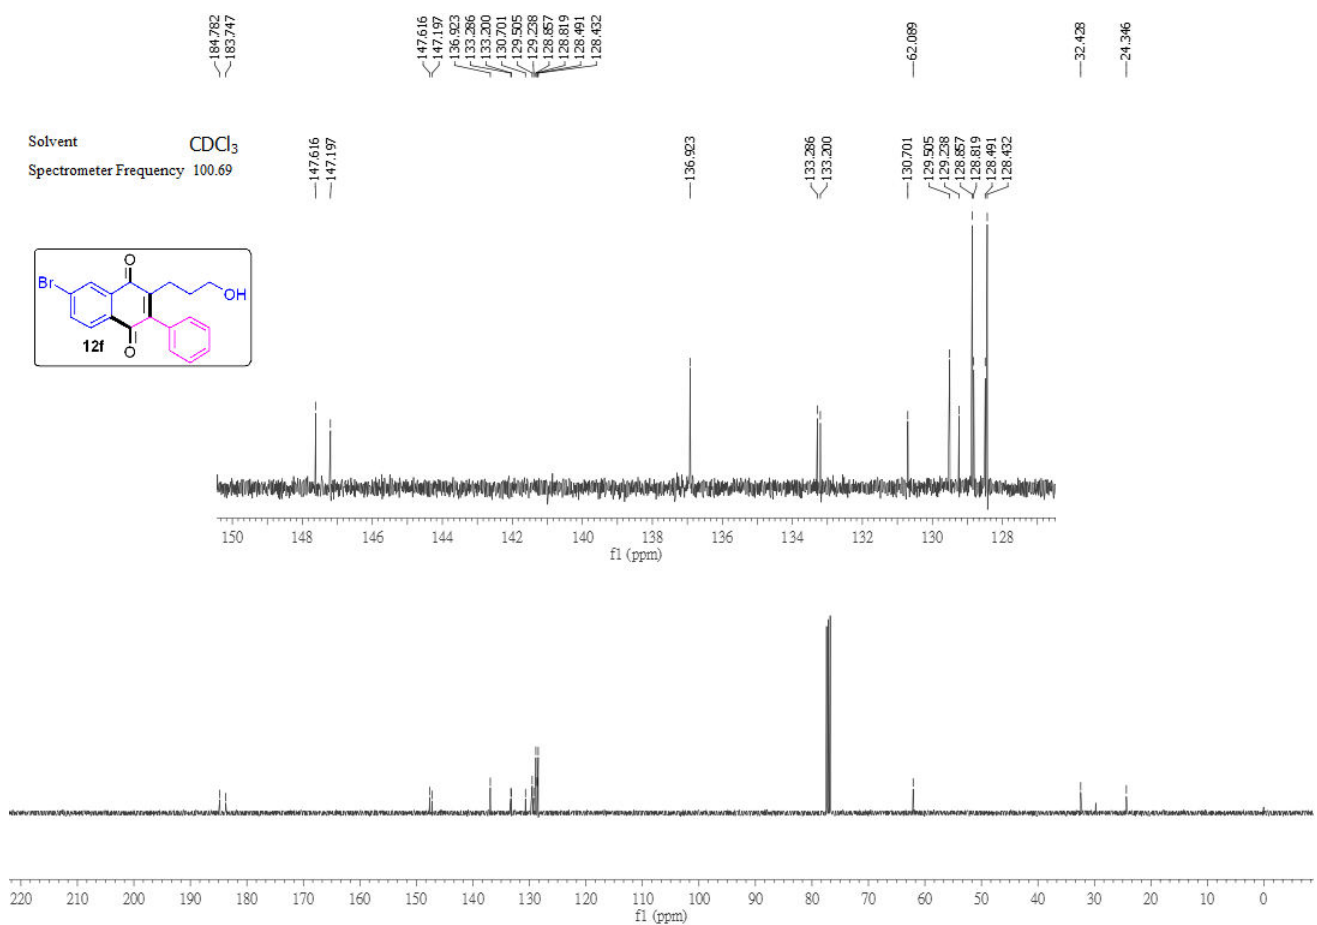



Solvent  $\text{CDCl}_3$   
Spectrometer Frequency 400.40

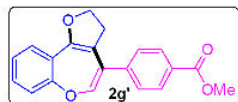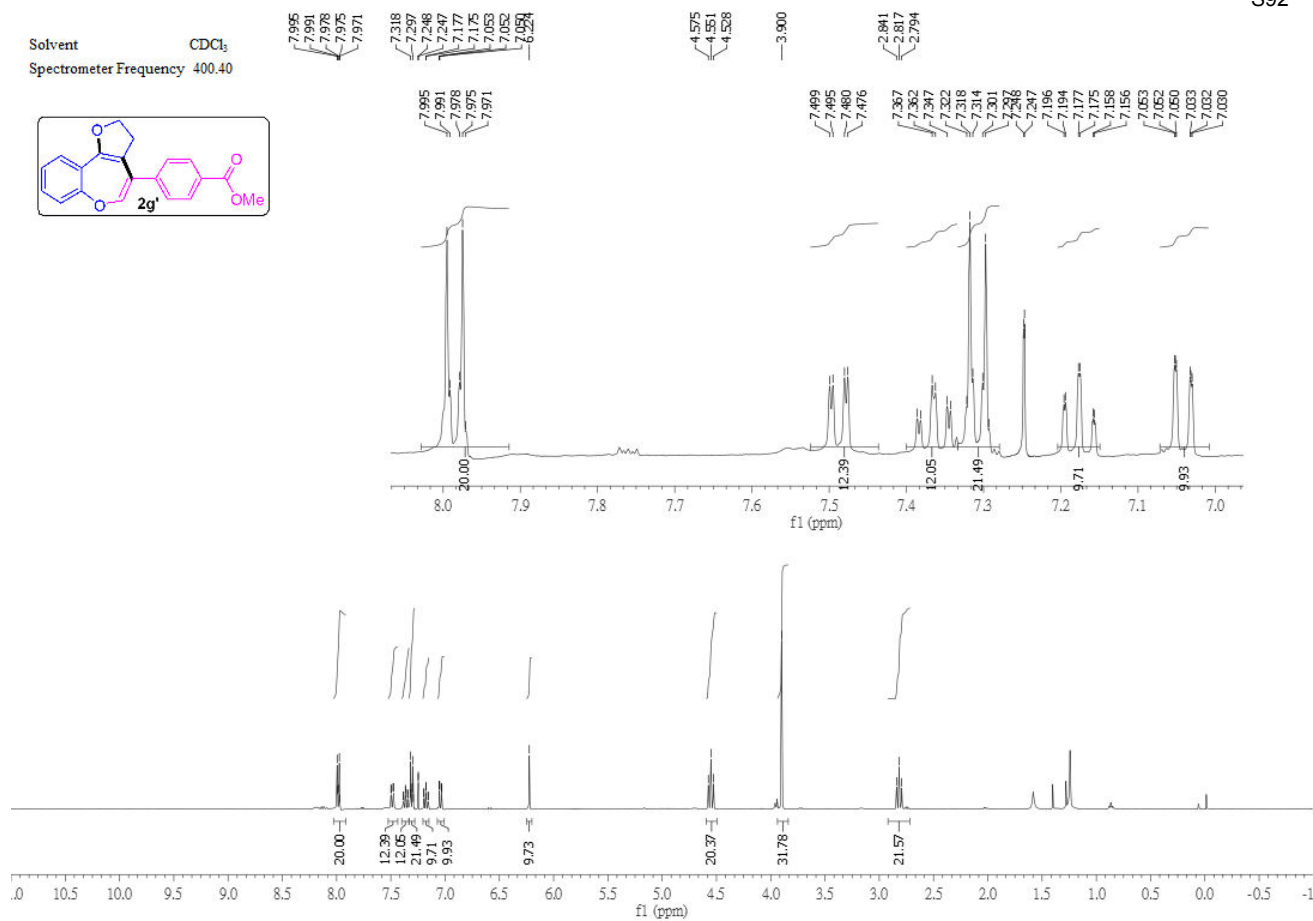

Solvent  $\text{CDCl}_3$   
Spectrometer Frequency 100.69

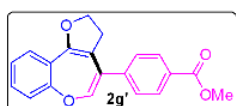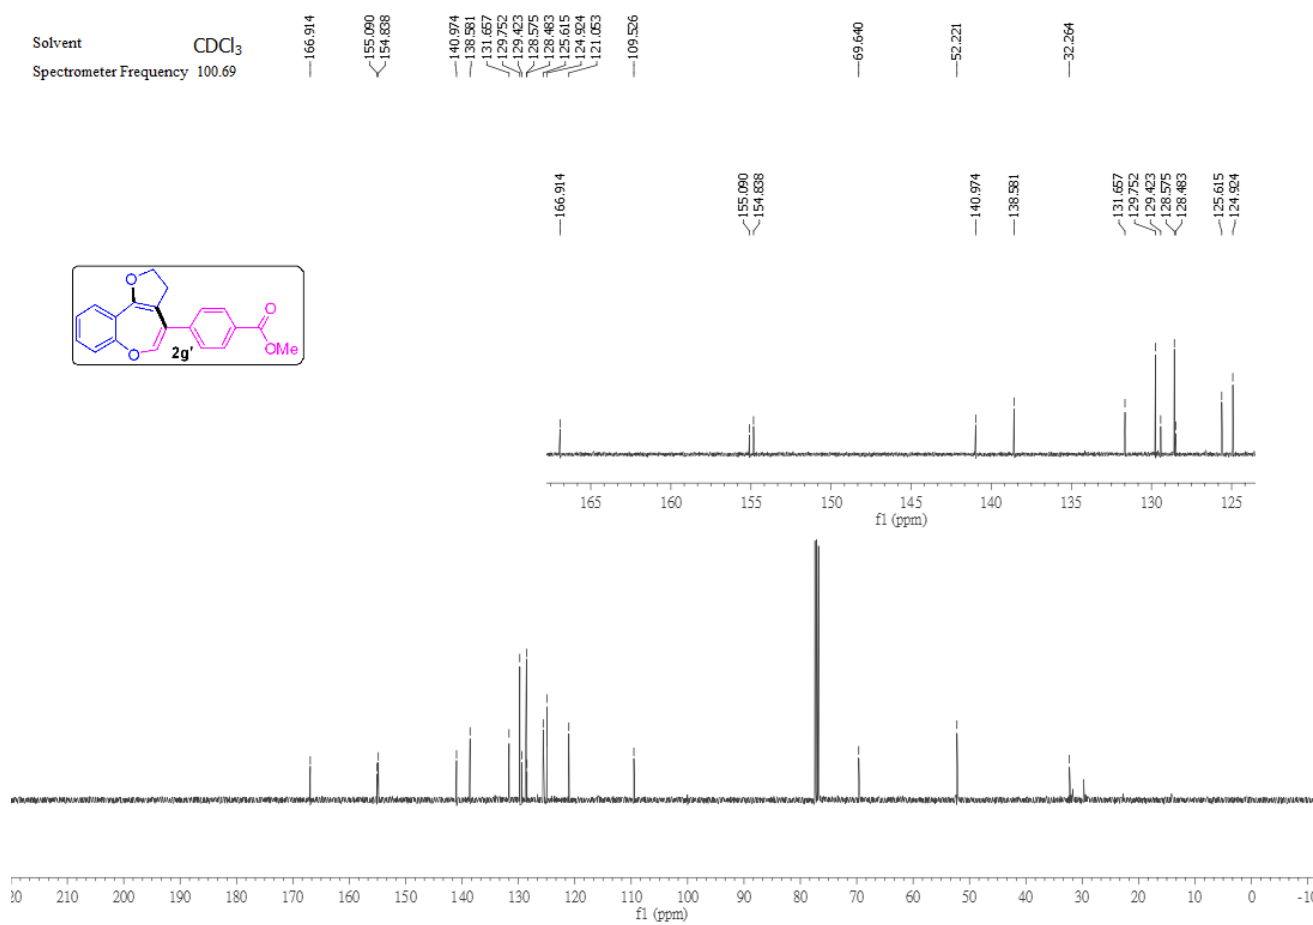



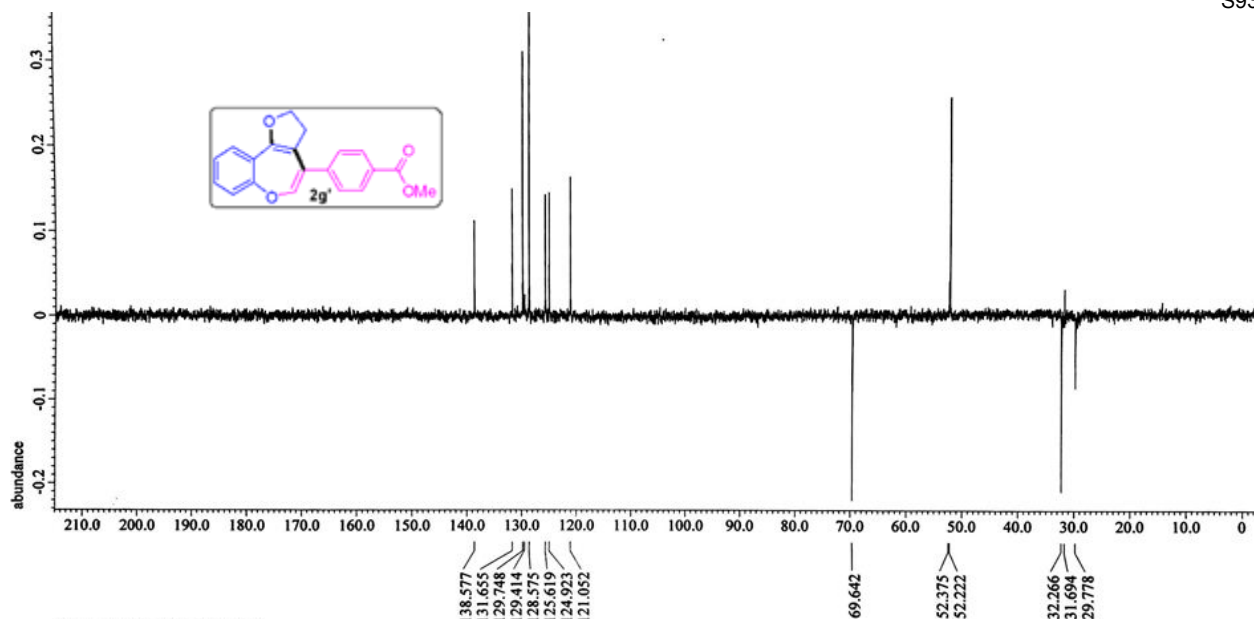

X : parts per Million : Carbon13

|               |                             |                 |                          |                   |                 |
|---------------|-----------------------------|-----------------|--------------------------|-------------------|-----------------|
| Filename      | = SGC_COCMe_gnt_DEPT135deg- | Spectrometer    | = DELTA2_NMR             | Scans             | = 512           |
| Author        | = delta                     | Field Strength  | = 9.389766[T] (400[MHz]) | Total Scans       | = 512           |
| Experiment    | = dept_13p                  | X Acq Duration  | = 1.04333312[s]          | Relaxation Delay  | = 2[s]          |
| Sample Id     | = SGC_COCMe/gnt             | X Domain        | = 13c                    | Recvr Gain        | = 40            |
| Solvent       | = CHLOROFORM-D              | X Freq          | = 100.52530333[MHz]      | Temp Get          | = 24.9[dc]      |
| Creation Time | = 13-JUL-2016 12:29:06      | X Offset        | = 100[ppm]               | X Acq Time        | = 1.04333312[s] |
| Revision Time | = 13-JUL-2016 12:47:38      | X Points        | = 32768                  | X Attn            | = 5.3[db]       |
| Current Time  | = 13-JUL-2016 12:49:43      | X Prescans      | = 4                      | X Pulse           | = 10.33[us]     |
| Comment       | = DEPT with decoupling      | X Resolution    | = 0.95846665[Hz]         | Irr Attn          | = 2.4[db]       |
| Date Format   | = 15 COMPLEX                | X Sweep         | = 31.40703518[kHz]       | Irr Attn Dec      | = 21.473[db]    |
| Dir Size      | = 26214                     | X Sweep Clipped | = 25.12562814[kHz]       | Irr Noise         | = 10.72         |
| Dir Title     | = Carbon13                  | Irr Domain      | = Proton                 | Irr Pulse         | = 12.795[us]    |
| Dir Units     | = [ppm]                     | Irr Freq        | = 399.78219838[MHz]      | Irr Pwidth        | = 0.115[ms]     |
| Dimensions    | = X                         | Irr Offset      | = 5[ppm]                 | Base Line Correct | = TRUE          |
| Site          | = JNM-EC6400                | Clipped         | = FALSE                  | Decoupling        | = TRUE          |

JEOL  
RESONANCE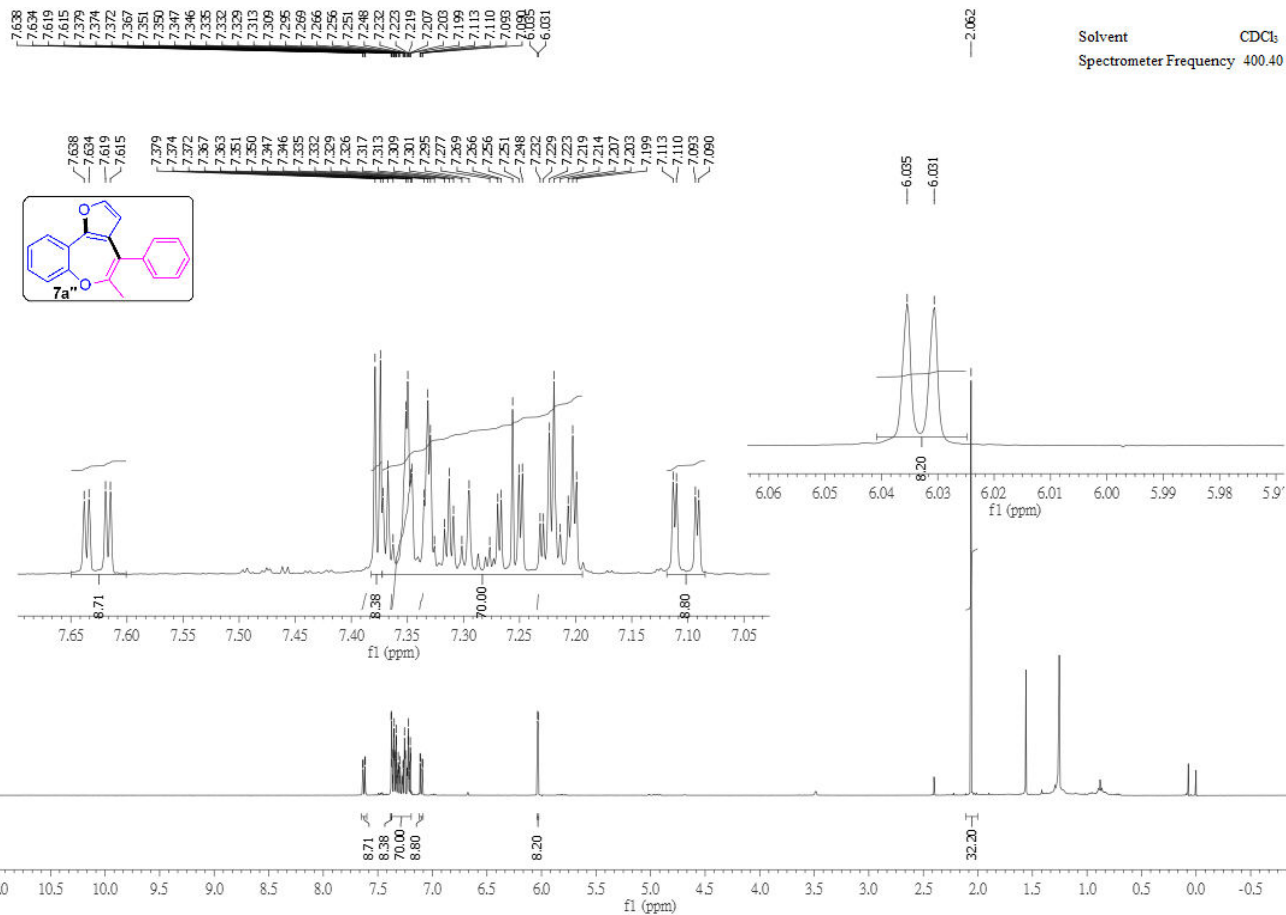



Solvent  $\text{CDCl}_3$   
Spectrometer Frequency 100.69

152.842  
149.155  
147.718  
141.742  
138.096  
129.970  
129.828  
129.808  
128.506  
127.267  
125.101  
125.031  
124.512  
121.866  
109.979

18.679

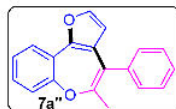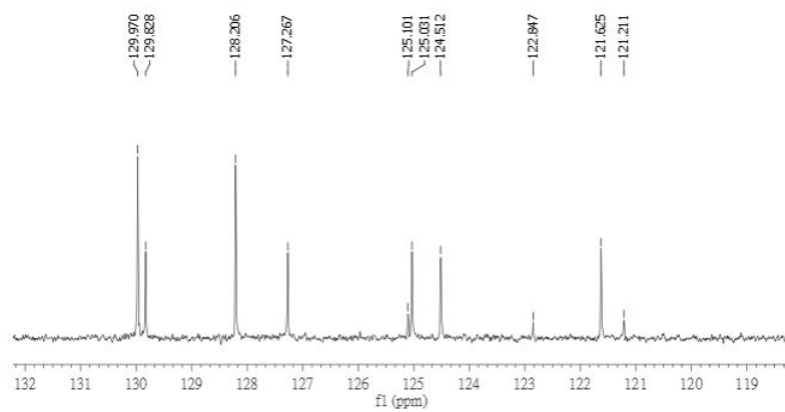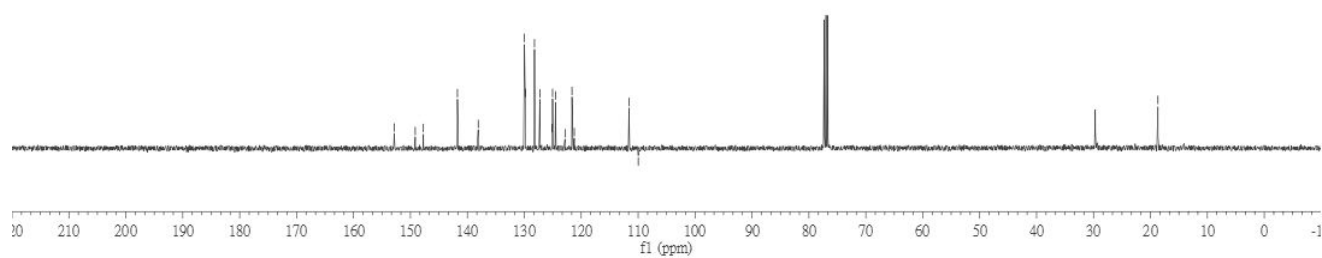



## checkCIF/PLATON report

Structure factors have been supplied for datablock(s) agau4ome

THIS REPORT IS FOR GUIDANCE ONLY. IF USED AS PART OF A REVIEW PROCEDURE FOR PUBLICATION, IT SHOULD NOT REPLACE THE EXPERTISE OF AN EXPERIENCED CRYSTALLOGRAPHIC REFEREE.

No syntax errors found.      CIF dictionary      Interpreting this report

### Datablock: agau4ome

---

|                 |                 |                                     |
|-----------------|-----------------|-------------------------------------|
| Bond precision: | C-C = 0.0026 A  | Wavelength=0.71073                  |
| Cell:           | a=9.9142(7)     | b=9.9565(8)      c=15.2208(13)      |
|                 | alpha=87.468(7) | beta=86.546(6)      gamma=88.917(6) |
| Temperature:    | 150 K           |                                     |
|                 | Calculated      | Reported                            |
| Volume          | 1498.1(2)       | 1498.1(2)                           |
| Space group     | P -1            | P -1                                |
| Hall group      | -P 1            | -P 1                                |
| Moiety formula  | C20 H18 O3      | C20 H18 O3                          |
| Sum formula     | C20 H18 O3      | C20 H18 O3                          |
| Mr              | 306.34          | 306.34                              |
| Dx,g cm-3       | 1.358           | 1.358                               |
| Z               | 4               | 4                                   |
| Mu (mm-1)       | 0.090           | 0.090                               |
| F000            | 648.0           | 648.0                               |
| F000'           | 648.32          |                                     |
| h,k,lmax        | 13,13,21        | 13,13,20                            |
| Nref            | 8322            | 6914                                |
| Tmin,Tmax       | 0.955,0.965     | 0.997,1.000                         |
| Tmin'           | 0.952           |                                     |

Correction method= # Reported T Limits: Tmin=0.997 Tmax=1.000  
AbsCorr = MULTI-SCAN

Data completeness= 0.831      Theta(max)= 29.467

R(reflections)= 0.0545( 4920)      wR2(reflections)= 0.1413( 6914)

S = 1.032      Npar= 450

---

The following ALERTS were generated. Each ALERT has the format  
**test-name\_ALERT\_alert-type\_alert-level.**  
Click on the hyperlinks for more details of the test.



**Alert level A**

PLAT183\_ALERT\_1\_A Missing \_cell\_measurement\_reflms\_used Value .... Please Do !  
 PLAT184\_ALERT\_1\_A Missing \_cell\_measurement\_theta\_min Value ..... Please Do !  
 PLAT185\_ALERT\_1\_A Missing \_cell\_measurement\_theta\_max Value ..... Please Do !

**Alert level C**

PLAT410\_ALERT\_2\_C Short Intra H...H Contact H23B ..H22D . 1.90 Ang.  
 PLAT906\_ALERT\_3\_C Large K Value in the Analysis of Variance ..... 3.084 Check  
 PLAT910\_ALERT\_3\_C Missing # of FCF Reflection(s) Below Theta(Min). 8 Note

**Alert level G**

PLAT301\_ALERT\_3\_G Main Residue Disorder .....(Resd 1 ) 9% Note  
 PLAT898\_ALERT\_4\_G Second Reported H-M Symbol in CIF Ignored ..... ! Check  
 PLAT912\_ALERT\_4\_G Missing # of FCF Reflections Above STh/L= 0.600 1397 Note  
 PLAT913\_ALERT\_3\_G Missing # of Very Strong Reflections in FCF .... 1 Note  
 PLAT978\_ALERT\_2\_G Number C-C Bonds with Positive Residual Density. 7 Info

3 **ALERT level A** = Most likely a serious problem - resolve or explain  
 0 **ALERT level B** = A potentially serious problem, consider carefully  
 3 **ALERT level C** = Check. Ensure it is not caused by an omission or oversight  
 5 **ALERT level G** = General information/check it is not something unexpected

3 ALERT type 1 CIF construction/syntax error, inconsistent or missing data  
 2 ALERT type 2 Indicator that the structure model may be wrong or deficient  
 4 ALERT type 3 Indicator that the structure quality may be low  
 2 ALERT type 4 Improvement, methodology, query or suggestion  
 0 ALERT type 5 Informative message, check



It is advisable to attempt to resolve as many as possible of the alerts in all categories. Often the minor alerts point to easily fixed oversights, errors and omissions in your CIF or refinement strategy, so attention to these fine details can be worthwhile. In order to resolve some of the more serious problems it may be necessary to carry out additional measurements or structure refinements. However, the purpose of your study may justify the reported deviations and the more serious of these should normally be commented upon in the discussion or experimental section of a paper or in the "special\_details" fields of the CIF. checkCIF was carefully designed to identify outliers and unusual parameters, but every test has its limitations and alerts that are not important in a particular case may appear. Conversely, the absence of alerts does not guarantee there are no aspects of the results needing attention. It is up to the individual to critically assess their own results and, if necessary, seek expert advice.

### Publication of your CIF in IUCr journals

A basic structural check has been run on your CIF. These basic checks will be run on all CIFs submitted for publication in IUCr journals (*Acta Crystallographica*, *Journal of Applied Crystallography*, *Journal of Synchrotron Radiation*); however, if you intend to submit to *Acta Crystallographica Section C* or *E* or *IUCrData*, you should make sure that full publication checks are run on the final version of your CIF prior to submission.

### Publication of your CIF in other journals

Please refer to the *Notes for Authors* of the relevant journal for any special instructions relating to CIF submission.

### Validation response form

Please find below a validation response form (VRF) that can be filled in and pasted into your CIF.

```
# start Validation Reply Form
_vrf_PLAT183_agau4ome
;
PROBLEM: Missing _cell_measurement_reflms_used Value ....      Please Do !
RESPONSE: ...
;
_vrf_PLAT184_agau4ome
;
PROBLEM: Missing _cell_measurement_theta_min Value .....      Please Do !
RESPONSE: ...
;
_vrf_PLAT185_agau4ome
;
PROBLEM: Missing _cell_measurement_theta_max Value .....      Please Do !
RESPONSE: ...
;
_vrf_PLAT410_agau4ome
;
PROBLEM: Short Intra H...H Contact H23B      ..H22D      .      1.90 Ang.
RESPONSE: ...
;
_vrf_PLAT906_agau4ome
;
PROBLEM: Large K Value in the Analysis of Variance .....      3.084 Check
RESPONSE: ...
;
_vrf_PLAT910_agau4ome
```



;  
PROBLEM: Missing # of FCF Reflection(s) Below Theta(Min). 8 Note  
RESPONSE: ...  
;  
# end Validation Reply Form

---

**PLATON version of 13/12/2017; check.def file version of 12/12/2017**

Datablock agau4ome - ellipsoid plot

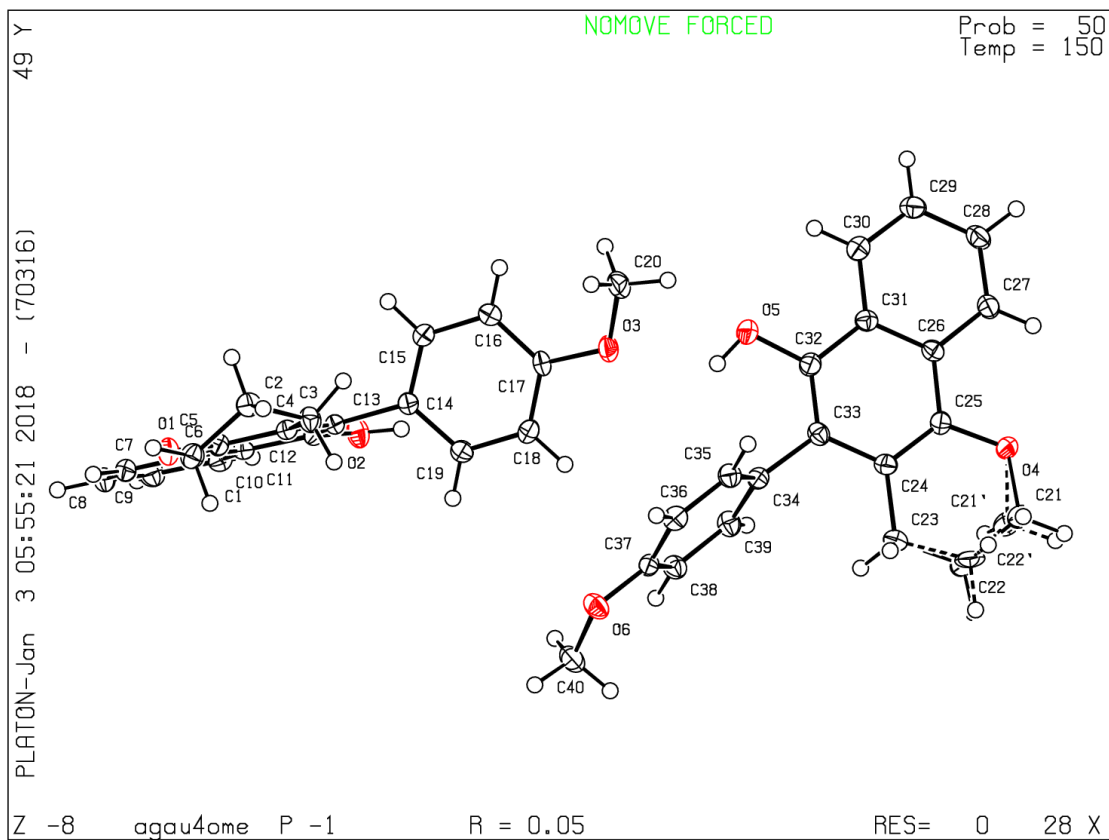



## checkCIF/PLATON report

Structure factors have been supplied for datablock(s) agptsme

THIS REPORT IS FOR GUIDANCE ONLY. IF USED AS PART OF A REVIEW PROCEDURE FOR PUBLICATION, IT SHOULD NOT REPLACE THE EXPERTISE OF AN EXPERIENCED CRYSTALLOGRAPHIC REFEREE.

No syntax errors found.      CIF dictionary      Interpreting this report

### Datablock: agptsme

---

|                 |                |                    |               |
|-----------------|----------------|--------------------|---------------|
| Bond precision: | C-C = 0.0038 A | Wavelength=0.71073 |               |
| Cell:           | a=14.0810(14)  | b=14.4862(11)      | c=16.1120(15) |
|                 | alpha=90       | beta=113.689(12)   | gamma=90      |
| Temperature:    | 297 K          |                    |               |
|                 | Calculated     | Reported           |               |
| Volume          | 3009.6(5)      | 3009.6(5)          |               |
| Space group     | C 2/c          | C 2/c              |               |
| Hall group      | -C 2yc         | -C 2yc             |               |
| Moiety formula  | C20 H18 O      | C20 H18 O          |               |
| Sum formula     | C20 H18 O      | C20 H18 O          |               |
| Mr              | 274.34         | 274.34             |               |
| Dx,g cm-3       | 1.211          | 1.211              |               |
| Z               | 8              | 8                  |               |
| Mu (mm-1)       | 0.073          | 0.073              |               |
| F000            | 1168.0         | 1168.0             |               |
| F000'           | 1168.47        |                    |               |
| h,k,lmax        | 19,20,22       | 18,19,21           |               |
| Nref            | 4148           | 3514               |               |
| Tmin,Tmax       | 0.966,0.978    | 0.975,1.000        |               |
| Tmin'           | 0.966          |                    |               |

Correction method= # Reported T Limits: Tmin=0.975 Tmax=1.000  
AbsCorr = MULTI-SCAN

Data completeness= 0.847      Theta(max)= 29.389

R(reflections)= 0.0714( 2080)      wR2(reflections)= 0.2261( 3514)

S = 1.030      Npar= 191

---

The following ALERTS were generated. Each ALERT has the format  
**test-name\_ALERT\_alert-type\_alert-level.**  
Click on the hyperlinks for more details of the test.



**Alert level C**

```

PLAT230_ALERT_2_C Hirshfeld Test Diff for   C2      --C3      .      5.5 s.u.
PLAT906_ALERT_3_C Large K Value in the Analysis of Variance ..... 9.949 Check
PLAT906_ALERT_3_C Large K Value in the Analysis of Variance ..... 2.234 Check

```

**Alert level G**

```

PLAT003_ALERT_2_G Number of Uiso or Uij Restrained non-H Atoms ...      2 Report
PLAT072_ALERT_2_G SHELXL First Parameter in WGHT Unusually Large      0.10 Report
PLAT177_ALERT_4_G The CIF-Embedded .res File Contains DELU Records      1 Report
PLAT860_ALERT_3_G Number of Least-Squares Restraints .....            1 Note
PLAT898_ALERT_4_G Second Reported H-M Symbol in CIF Ignored .....      ! Check
PLAT910_ALERT_3_G Missing # of FCF Reflection(s) Below Theta(Min).      4 Note
PLAT912_ALERT_4_G Missing # of FCF Reflections Above STh/L= 0.600      608 Note
PLAT978_ALERT_2_G Number C-C Bonds with Positive Residual Density.      2 Info

```

```

0 ALERT level A = Most likely a serious problem - resolve or explain
0 ALERT level B = A potentially serious problem, consider carefully
3 ALERT level C = Check. Ensure it is not caused by an omission or oversight
8 ALERT level G = General information/check it is not something unexpected

```

```

0 ALERT type 1 CIF construction/syntax error, inconsistent or missing data
4 ALERT type 2 Indicator that the structure model may be wrong or deficient
4 ALERT type 3 Indicator that the structure quality may be low
3 ALERT type 4 Improvement, methodology, query or suggestion
0 ALERT type 5 Informative message, check

```

**Validation response form**

Please find below a validation response form (VRF) that can be filled in and pasted into your CIF.

```

# start Validation Reply Form
_vrf_PLAT230_agptsme
;
PROBLEM: Hirshfeld Test Diff for   C2      --C3      .      5.5 s.u.
RESPONSE: ...
;
_vrf_PLAT906_agptsme
;
PROBLEM: Large K Value in the Analysis of Variance ..... 9.949 Check
RESPONSE: ...
;
# end Validation Reply Form

```



It is advisable to attempt to resolve as many as possible of the alerts in all categories. Often the minor alerts point to easily fixed oversights, errors and omissions in your CIF or refinement strategy, so attention to these fine details can be worthwhile. In order to resolve some of the more serious problems it may be necessary to carry out additional measurements or structure refinements. However, the purpose of your study may justify the reported deviations and the more serious of these should normally be commented upon in the discussion or experimental section of a paper or in the "special\_details" fields of the CIF. checkCIF was carefully designed to identify outliers and unusual parameters, but every test has its limitations and alerts that are not important in a particular case may appear. Conversely, the absence of alerts does not guarantee there are no aspects of the results needing attention. It is up to the individual to critically assess their own results and, if necessary, seek expert advice.

### **Publication of your CIF in IUCr journals**

A basic structural check has been run on your CIF. These basic checks will be run on all CIFs submitted for publication in IUCr journals (*Acta Crystallographica*, *Journal of Applied Crystallography*, *Journal of Synchrotron Radiation*); however, if you intend to submit to *Acta Crystallographica Section C* or *E* or *IUCrData*, you should make sure that full publication checks are run on the final version of your CIF prior to submission.

### **Publication of your CIF in other journals**

Please refer to the *Notes for Authors* of the relevant journal for any special instructions relating to CIF submission.



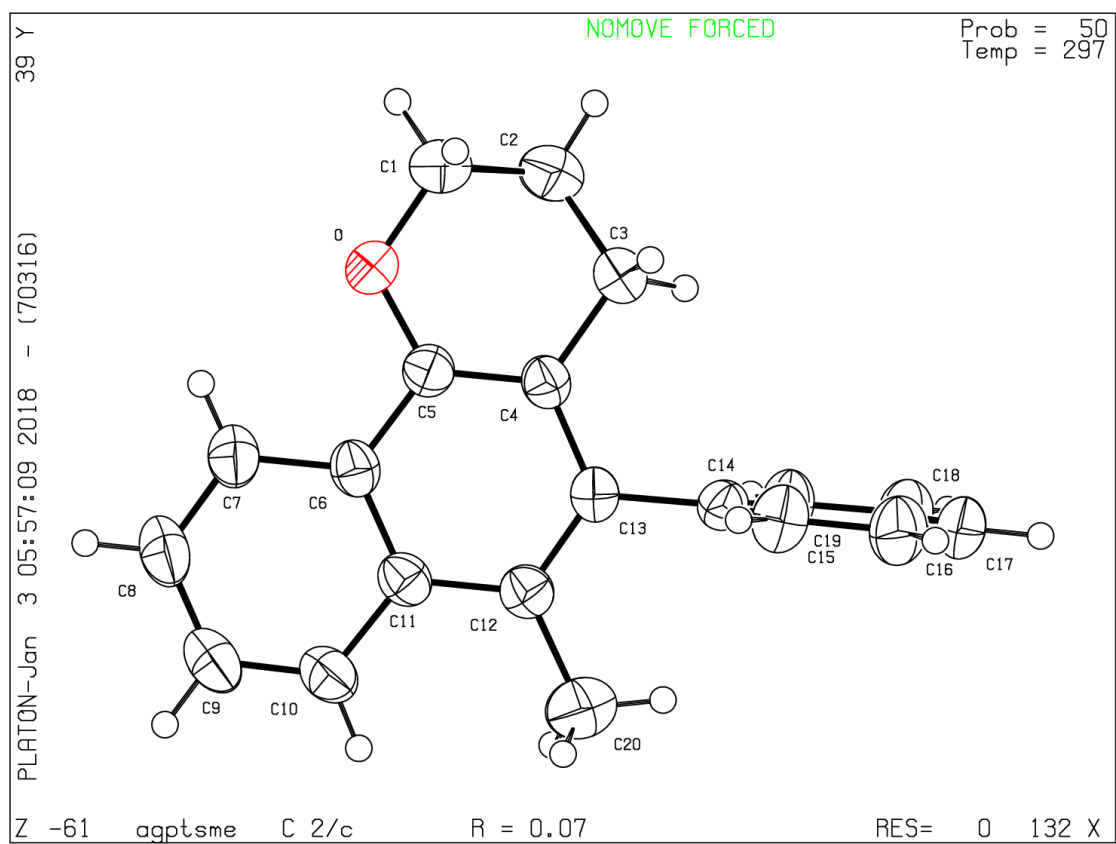



## checkCIF/PLATON report

Structure factors have been supplied for datablock(s) pmeint

THIS REPORT IS FOR GUIDANCE ONLY. IF USED AS PART OF A REVIEW PROCEDURE FOR PUBLICATION, IT SHOULD NOT REPLACE THE EXPERTISE OF AN EXPERIENCED CRYSTALLOGRAPHIC REFEREE.

No syntax errors found.      CIF dictionary      Interpreting this report

### Datablock: pmeint

---

Bond precision:    C-C = 0.0045 Å                      Wavelength=0.71073

Cell:                a=6.3828(8)                      b=10.3101(16)                      c=11.896(2)  
                       alpha=104.198(14)    beta=100.779(12)    gamma=97.652(12)

Temperature:    297 K

|                | Calculated  | Reported    |
|----------------|-------------|-------------|
| Volume         | 732.3(2)    | 732.2(2)    |
| Space group    | P -1        | P -1        |
| Hall group     | -P 1        | -P 1        |
| Moiety formula | C19 H16 O2  | C19 H16 O2  |
| Sum formula    | C19 H16 O2  | C19 H16 O2  |
| Mr             | 276.32      | 276.32      |
| Dx,g cm-3      | 1.253       | 1.253       |
| Z              | 2           | 2           |
| Mu (mm-1)      | 0.080       | 0.080       |
| F000           | 292.0       | 292.0       |
| F000'          | 292.13      |             |
| h,k,lmax       | 8,14,16     | 8,14,15     |
| Nref           | 3949        | 3328        |
| Tmin,Tmax      | 0.960,0.984 | 0.929,1.000 |
| Tmin'          | 0.951       |             |

Correction method= # Reported T Limits: Tmin=0.929 Tmax=1.000  
 AbsCorr = MULTI-SCAN

Data completeness= 0.843                      Theta(max)= 29.156

R(reflections)= 0.0636( 1834)                      wR2(reflections)= 0.2617( 3328)

S = 0.867                      Npar= 191

---

The following ALERTS were generated. Each ALERT has the format

**test-name\_ALERT\_alert-type\_alert-level.**

Click on the hyperlinks for more details of the test.



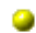**Alert level C**

|                                                                    |              |
|--------------------------------------------------------------------|--------------|
| PLAT084_ALERT_3_C High wR2 Value (i.e. > 0.25) .....               | 0.26 Report  |
| PLAT340_ALERT_3_C Low Bond Precision on C-C Bonds .....            | 0.00455 Ang. |
| PLAT906_ALERT_3_C Large K Value in the Analysis of Variance .....  | 4.389 Check  |
| PLAT978_ALERT_2_C Number C-C Bonds with Positive Residual Density. | 0 Info       |

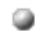**Alert level G**

|                                                                    |              |
|--------------------------------------------------------------------|--------------|
| PLAT063_ALERT_4_G Crystal Size Likely too Large for Beam Size .... | 0.63 mm      |
| PLAT072_ALERT_2_G SHELXL First Parameter in WGHT Unusually Large   | 0.17 Report  |
| PLAT380_ALERT_4_G Incorrectly? Oriented X(sp2)-Methyl Moiety ..... | C13 Check    |
| PLAT398_ALERT_2_G Deviating C-O-C Angle From 120 for O2            | 106.2 Degree |
| PLAT898_ALERT_4_G Second Reported H-M Symbol in CIF Ignored .....  | ! Check      |
| PLAT910_ALERT_3_G Missing # of FCF Reflection(s) Below Theta(Min). | 3 Note       |
| PLAT912_ALERT_4_G Missing # of FCF Reflections Above STh/L= 0.600  | 604 Note     |

---

0 **ALERT level A** = Most likely a serious problem - resolve or explain  
 0 **ALERT level B** = A potentially serious problem, consider carefully  
 4 **ALERT level C** = Check. Ensure it is not caused by an omission or oversight  
 7 **ALERT level G** = General information/check it is not something unexpected

0 ALERT type 1 CIF construction/syntax error, inconsistent or missing data  
 3 ALERT type 2 Indicator that the structure model may be wrong or deficient  
 4 ALERT type 3 Indicator that the structure quality may be low  
 4 ALERT type 4 Improvement, methodology, query or suggestion  
 0 ALERT type 5 Informative message, check

---

**Validation response form**

Please find below a validation response form (VRF) that can be filled in and pasted into your CIF.

```
# start Validation Reply Form
_vrf_PLAT084_pmeint
;
PROBLEM: High wR2 Value (i.e. > 0.25) ..... 0.26 Report
RESPONSE: ...
;
_vrf_PLAT340_pmeint
;
PROBLEM: Low Bond Precision on C-C Bonds ..... 0.00455 Ang.
RESPONSE: ...
;
_vrf_PLAT906_pmeint
;
PROBLEM: Large K Value in the Analysis of Variance ..... 4.389 Check
RESPONSE: ...
;
_vrf_PLAT978_pmeint
;
PROBLEM: Number C-C Bonds with Positive Residual Density. 0 Info
RESPONSE: ...
;
# end Validation Reply Form
```

---



It is advisable to attempt to resolve as many as possible of the alerts in all categories. Often the minor alerts point to easily fixed oversights, errors and omissions in your CIF or refinement strategy, so attention to these fine details can be worthwhile. In order to resolve some of the more serious problems it may be necessary to carry out additional measurements or structure refinements. However, the purpose of your study may justify the reported deviations and the more serious of these should normally be commented upon in the discussion or experimental section of a paper or in the "special\_details" fields of the CIF. checkCIF was carefully designed to identify outliers and unusual parameters, but every test has its limitations and alerts that are not important in a particular case may appear. Conversely, the absence of alerts does not guarantee there are no aspects of the results needing attention. It is up to the individual to critically assess their own results and, if necessary, seek expert advice.

### **Publication of your CIF in IUCr journals**

A basic structural check has been run on your CIF. These basic checks will be run on all CIFs submitted for publication in IUCr journals (*Acta Crystallographica*, *Journal of Applied Crystallography*, *Journal of Synchrotron Radiation*); however, if you intend to submit to *Acta Crystallographica Section C* or *E* or *IUCrData*, you should make sure that full publication checks are run on the final version of your CIF prior to submission.

### **Publication of your CIF in other journals**

Please refer to the *Notes for Authors* of the relevant journal for any special instructions relating to CIF submission.



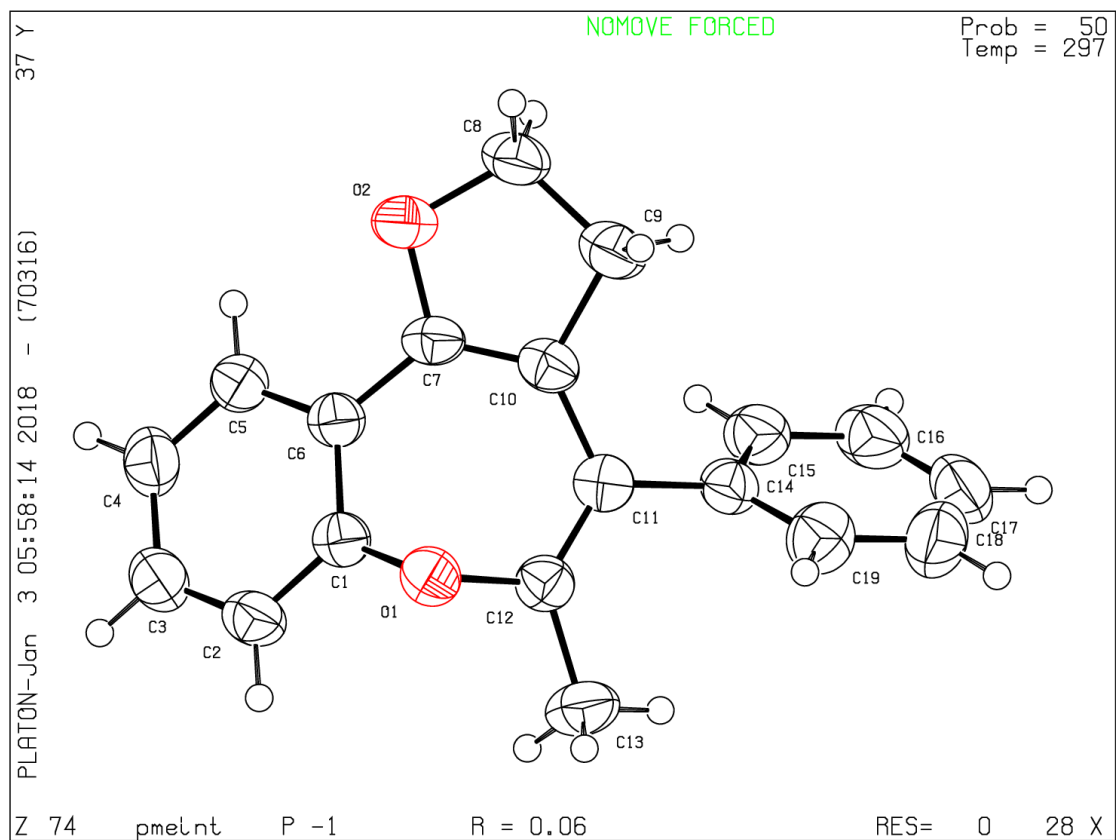



## checkCIF/PLATON report

Structure factors have been supplied for datablock(s) rp12173

THIS REPORT IS FOR GUIDANCE ONLY. IF USED AS PART OF A REVIEW PROCEDURE FOR PUBLICATION, IT SHOULD NOT REPLACE THE EXPERTISE OF AN EXPERIENCED CRYSTALLOGRAPHIC REFEREE.

No syntax errors found.      CIF dictionary      Interpreting this report

### Datablock: rp12173

---

|                 |                |                    |              |
|-----------------|----------------|--------------------|--------------|
| Bond precision: | C-C = 0.0033 A | Wavelength=0.71073 |              |
| Cell:           | a=9.5200(17)   | b=13.201(2)        | c=8.3853(14) |
|                 | alpha=90       | beta=112.716(19)   | gamma=90     |
| Temperature:    | 297 K          |                    |              |
|                 | Calculated     | Reported           |              |
| Volume          | 972.1(3)       | 972.1(3)           |              |
| Space group     | P 21/c         | P 21/c             |              |
| Hall group      | -P 2ybc        | -P 2ybc            |              |
| Moiety formula  | C12 H10 O3     | C12 H10 O3         |              |
| Sum formula     | C12 H10 O3     | C12 H10 O3         |              |
| Mr              | 202.20         | 202.20             |              |
| Dx,g cm-3       | 1.382          | 1.382              |              |
| Z               | 4              | 4                  |              |
| Mu (mm-1)       | 0.099          | 0.099              |              |
| F000            | 424.0          | 424.0              |              |
| F000'           | 424.24         |                    |              |
| h,k,lmax        | 12,17,11       | 12,17,11           |              |
| Nref            | 2578           | 2225               |              |
| Tmin,Tmax       | 0.977,0.982    | 0.876,1.000        |              |
| Tmin'           | 0.940          |                    |              |

Correction method= # Reported T Limits: Tmin=0.876 Tmax=1.000  
AbsCorr = MULTI-SCAN

Data completeness= 0.863      Theta(max)= 28.974

R(reflections)= 0.0549( 1352)      wR2(reflections)= 0.1454( 2225)

S = 1.046      Npar= 137

---

The following ALERTS were generated. Each ALERT has the format

**test-name\_ALERT\_alert-type\_alert-level.**

Click on the hyperlinks for more details of the test.



**● Alert level C**

PLAT906\_ALERT\_3\_C Large K Value in the Analysis of Variance ..... 12.177 Check  
 PLAT906\_ALERT\_3\_C Large K Value in the Analysis of Variance ..... 2.432 Check

**● Alert level G**

PLAT063\_ALERT\_4\_G Crystal Size Likely too Large for Beam Size .... 0.62 mm  
 PLAT398\_ALERT\_2\_G Deviating C-O-C Angle From 120 for O1 108.2 Degree  
 PLAT898\_ALERT\_4\_G Second Reported H-M Symbol in CIF Ignored ..... ! Check  
 PLAT910\_ALERT\_3\_G Missing # of FCF Reflection(s) Below Theta(Min). 1 Note  
 PLAT912\_ALERT\_4\_G Missing # of FCF Reflections Above STh/L= 0.600 351 Note  
 PLAT978\_ALERT\_2\_G Number C-C Bonds with Positive Residual Density. 1 Info

0 **ALERT level A** = Most likely a serious problem - resolve or explain  
 0 **ALERT level B** = A potentially serious problem, consider carefully  
 2 **ALERT level C** = Check. Ensure it is not caused by an omission or oversight  
 6 **ALERT level G** = General information/check it is not something unexpected

0 ALERT type 1 CIF construction/syntax error, inconsistent or missing data  
 2 ALERT type 2 Indicator that the structure model may be wrong or deficient  
 3 ALERT type 3 Indicator that the structure quality may be low  
 3 ALERT type 4 Improvement, methodology, query or suggestion  
 0 ALERT type 5 Informative message, check

**Validation response form**

Please find below a validation response form (VRF) that can be filled in and pasted into your CIF.

```
# start Validation Reply Form
_vrf_PLAT906_rp12173
;
PROBLEM: Large K Value in the Analysis of Variance ..... 12.177 Check
RESPONSE: ...
;
# end Validation Reply Form
```



It is advisable to attempt to resolve as many as possible of the alerts in all categories. Often the minor alerts point to easily fixed oversights, errors and omissions in your CIF or refinement strategy, so attention to these fine details can be worthwhile. In order to resolve some of the more serious problems it may be necessary to carry out additional measurements or structure refinements. However, the purpose of your study may justify the reported deviations and the more serious of these should normally be commented upon in the discussion or experimental section of a paper or in the "special\_details" fields of the CIF. checkCIF was carefully designed to identify outliers and unusual parameters, but every test has its limitations and alerts that are not important in a particular case may appear. Conversely, the absence of alerts does not guarantee there are no aspects of the results needing attention. It is up to the individual to critically assess their own results and, if necessary, seek expert advice.

### **Publication of your CIF in IUCr journals**

A basic structural check has been run on your CIF. These basic checks will be run on all CIFs submitted for publication in IUCr journals (*Acta Crystallographica*, *Journal of Applied Crystallography*, *Journal of Synchrotron Radiation*); however, if you intend to submit to *Acta Crystallographica Section C* or *E* or *IUCrData*, you should make sure that full publication checks are run on the final version of your CIF prior to submission.

### **Publication of your CIF in other journals**

Please refer to the *Notes for Authors* of the relevant journal for any special instructions relating to CIF submission.



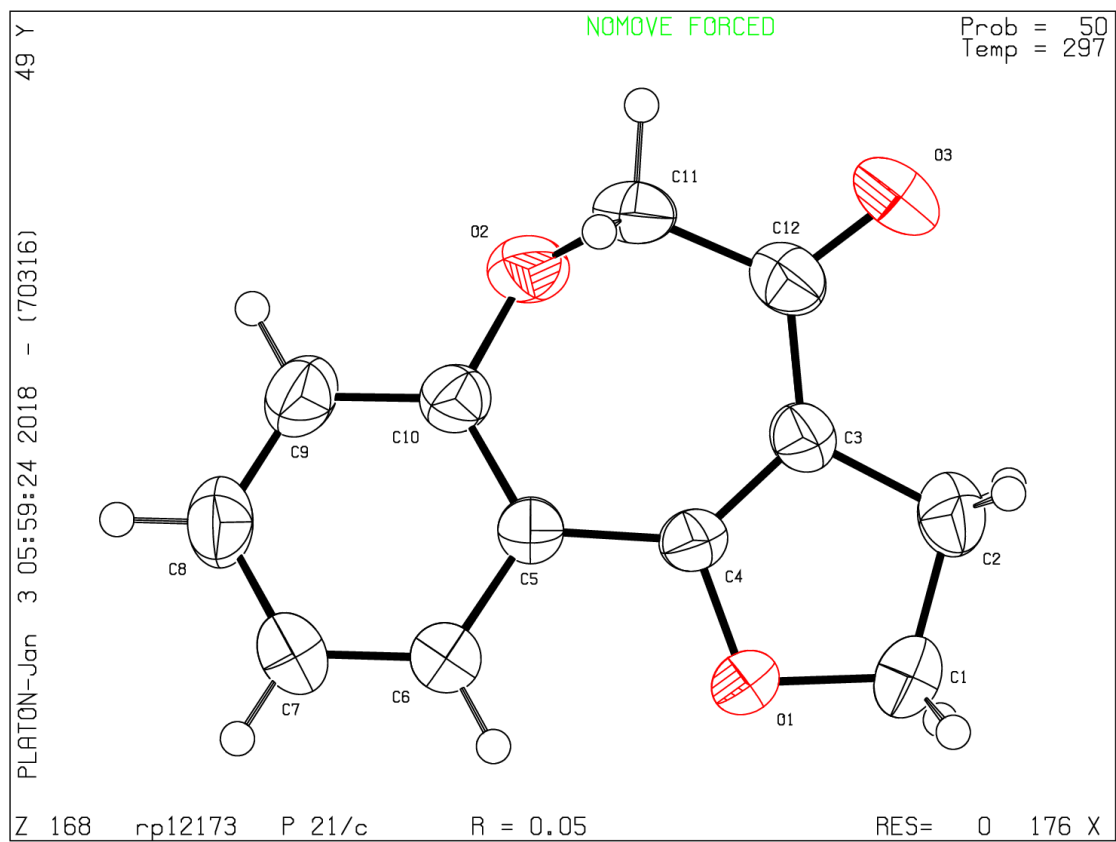

Supplement: c8gc00749g1.pdf [file c8gc00749g1.pdf]
